# Supplementary material for: A differential transcriptional profile by Culex quinquefasciatus larvae resistant to Lysinibacillus sphaericus IAB59 highlights genes and pathways associated with the resistance phenotype
Source: Parasit Vectors. 2019 Aug 20;12:407. doi: 10.1186/s13071-019-3661-y (PMC6702717; doi:10.1186/s13071-019-3661-y)
Supplement: Supplementary file 1 — Additional file 1: Table S1. Differentially expressed genes of Culex quinquefasciatus larvae from a Lysinibacillus sphaericus resistant colony (RIAB59) compared to a susceptible colony. [file 13071_2019_3661_MOESM1_ESM.xls]

## Sheet: Table S1
Additional file 1: Table S1. Differentially expressed genes of Culex quinquefasciatus larvae from a Lysinibacillus sphaericus resistant colony (RIAB59) compared to a susceptible colony.
Gene_id	Annotation	baseMean	log2FoldChange	lfcSE	stat	pvalue	padj	KEGG.ID	blast2go_nr_annotation	blast2go_uniprot_annotation	blast_nr_annotation	uniprot_manual_annotation
CPIJ017593	pantetheinase precursor	166.07	7.1285	0.481716	14.7982	1.51e-49	5.89e-47		Vanin 1	VNNL1_DROMEVanin 1 OS=Drosophila melanogaster OX=7227 GN=vanin-like PE=1 SV=1	INVnr_XP_001867961.1_pantetheinase_[Culex_quinquefasciatus]
CPIJ017592	Vanin-like protein 1 precursor, putative	59.4711	6.14299	0.524342	11.7156	1.06e-31	1.62e-29		Vanin 1	VNNL1_DROMEVanin 1 OS=Drosophila melanogaster OX=7227 GN=vanin-like PE=1 SV=1	INVnr_XP_001867960.1_Vanin-like_protein_1_[Culex_quinquefasciatus]
CPIJ001035	conserved hypothetical protein	93.0874	5.43236	0.384248	14.1377	2.23e-45	7.13e-43		lipase member H	LIPH_HUMANLipase member H OS=Homo sapiens OX=9606 GN=LIPH PE=1 SV=1	INVnr_XP_001842704.1_conserved_hypothetical_protein_[Culex_quinquefasciatus]
CPIJ016846	CYP6M13: cytochrome P450 6M13	40.4317	5.1442	0.512805	10.0315	1.11e-23	9.76e-22		cytochrome P450 6a8	CP6A8_DROMECytochrome P450 6a8 OS=Drosophila melanogaster OX=7227 GN=Cyp6a8 PE=2 SV=2	INVnr_XP_001867271.1_cytochrome_P450_6a8_[Culex_quinquefasciatus]
CPIJ013173	neutral and basic amino acid transport protein rBAT	1613.82	4.64647	0.124724	37.254	9.14e-304	6.44e-300		neutral and basic amino acid transport rBAT	MAL2_DROVIMaltase 2 OS=Drosophila virilis OX=7244 GN=Mal-B2 PE=3 SV=2	INVnr_XP_001863695.1_neutral_and_basic_amino_acid_transport_protein_rBAT_[Culex_quinquefasciatus]
CPIJ011081	heat shock protein 70 B2	63.5515	4.58172	0.622901	7.35546	1.9e-13	5.43e-12	cqu03040,cqu04141,cqu04144,cqu04213	heat shock 70 B2	HSP74_ANOALHeat shock 70 B2 OS=Anopheles albimanus OX=7167 GN=HSP70B2 PE=3 SV=1	INVnr_XP_001861437.1_heat_shock_protein_70_B2_[Culex_quinquefasciatus]
CPIJ002679	glutathione S-transferase theta-2	306.352	4.57226	0.558919	8.18053	2.83e-16	1.14e-14		glutathione S-transferase theta-2	GSTT1_MUSDOGlutathione S-transferase 1 OS=Musca domestica OX=7370 GN=Gst1 PE=2 SV=1	INVnr_XP_001844262.1_glutathione_S-transferase_theta-2_[Culex_quinquefasciatus]
CPIJ018744	ankyrin 2,3/unc44	18.4549	4.44307	0.551733	8.05294	8.08e-16	3.15e-14		ankyrin 2,3	ANK2_MOUSEAnkyrin-2 OS=Mus musculus OX=10090 GN=Ank2 PE=1 SV=2	INVnr_XP_001869129.1_ankyrin_2,3/unc44,_partial_[Culex_quinquefasciatus]
CPIJ006512	hypothetical protein	13.5648	4.35098	0.585699	7.4287	1.1e-13	3.25e-12		---NA---	---NA---	NA
CPIJ014435	hypothetical protein	20.1435	4.32824	0.529147	8.17966	2.85e-16	1.15e-14		hypothetical protein CpipJ_CPIJ014435	---NA---	INVnr_XP_001864879.1_hypothetical_protein_CpipJ_CPIJ014435_[Culex_quinquefasciatus]	Cuticle protein 38-like
CPIJ009045	conserved hypothetical protein	90.5472	4.19012	0.318606	13.1514	1.67e-39	3.92e-37		delta(7)-sterol 5(6)-desaturase erg32-like	---NA---	INVnr_XP_001850583.1_conserved_hypothetical_protein_[Culex_quinquefasciatus]	Fatty acid hydroxylase superfamily
CPIJ015726	apolipoprotein D, putative	14.8922	4.10194	0.570613	7.18866	6.54e-13	1.76e-11		apolipo D	APOD_CAVPOApolipo D OS=Cavia porcellus OX=10141 GN=APOD PE=2 SV=1	INVnr_XP_001866789.1_apolipoprotein_D_[Culex_quinquefasciatus]
CPIJ005154	nuclear transport factor 2	19.0926	4.06146	0.517339	7.85067	4.14e-15	1.48e-13		nuclear transport factor 2	---NA---	INVnr_XP_001846934.1_nuclear_transport_factor_2_[Culex_quinquefasciatus]
CPIJ002783	AN1-type zinc finger protein 2B	139.459	3.97327	0.567418	7.00237	2.52e-12	6.17e-11		AN1-type zinc finger 2B	ZFN2B_HUMANAN1-type zinc finger 2B OS=Homo sapiens OX=9606 GN=ZFAND2B PE=1 SV=1	INVnr_XP_001844366.1_AN1-type_zinc_finger_protein_2B_[Culex_quinquefasciatus]
CPIJ014193	conserved hypothetical protein	115.896	3.95375	0.26218	15.0803	2.18e-51	9.61e-49		conserved hypothetical protein	---NA---	INVnr_XP_001864222.1_conserved_hypothetical_protein_[Culex_quinquefasciatus]	Chitin-binding protein
CPIJ008858	conserved hypothetical protein	52.0461	3.94149	0.353226	11.1585	6.51e-29	8.18e-27		conserved hypothetical protein	LCP_STRK3Rubber oxygenase OS=Streptomyces (strain K30) OX=256642 GN=lcp PE=1 SV=2	INVnr_XP_001850776.1_conserved_hypothetical_protein_[Culex_quinquefasciatus]	STRK3 / Rubber oxygenase
CPIJ004068	suppressor of T-cell receptor signaling 1	255.758	3.88499	0.543481	7.14835	8.78e-13	2.32e-11		suppressor of T-cell receptor signaling 1	UBS3A_DROME UBASH3A homolog OS=Drosophila melanogaster OX=7227 GN=CG13604 PE=2 SV=1	INVnr_XP_001845698.1_suppressor_of_T-cell_receptor_signaling_1_[Culex_quinquefasciatus]
CPIJ011433	brachyurin	1148.92	3.76644	0.303828	12.3966	2.73e-35	5.19e-33		brachyurin	CTRB1_LITVAChymotrypsin BI OS=Litopenaeus vannamei OX=6689 PE=1 SV=1	INVnr_XP_001861478.1_brachyurin_[Culex_quinquefasciatus]
CPIJ017634	disulfide oxidoreductase	8.53661	3.74848	0.609479	6.15029	7.73e-10	1.29e-08		apoptosis-inducing factor mitochondrial	AIFM1_DROME apoptosis-inducing factor mitochondrial OS=Drosophila melanogaster OX=7227 GN=AIF PE=2 SV=2	INVnr_XP_001868357.1_disulfide_oxidoreductase_[Culex_quinquefasciatus]
CPIJ007305	conserved hypothetical protein	10.0848	3.71506	0.580948	6.39483	1.61e-10	2.92e-09		conserved hypothetical protein	---NA---	INVnr_XP_001848673.1_conserved_hypothetical_protein_[Culex_quinquefasciatus]
CPIJ018624	glutathione-s-transferase theta, gst	51.143	3.64238	0.351934	10.3496	4.2e-25	4.29e-23		glutathione-s-transferase gst	GSTT1_MANSEGlutathione S-transferase 1 OS=Manduca sexta OX=7130 GN=GST1 PE=2 SV=1	INVnr_XP_001868767.1_glutathione-s-transferase_theta,_gst_[Culex_quinquefasciatus]
CPIJ005645	heat shock protein 22	314.092	3.63148	0.639789	5.67605	1.38e-08	1.84e-07		lethal(2)essential for life	L2EFL_DROME lethal(2)essential for life OS=Drosophila melanogaster OX=7227 GN=l(2)efl PE=1 SV=1	INVnr_XP_001847194.1_heat_shock_protein_22_[Culex_quinquefasciatus]
CPIJ003813	pickpocket	10.8603	3.57288	0.55677	6.41716	1.39e-10	2.55e-09		gonad-specific amiloride-sensitive sodium channel 1	---NA---	INVnr_XP_001845386.1_pickpocket_[Culex_quinquefasciatus]
CPIJ008659	metalloproteinase, putative	17.6517	3.52855	0.508651	6.93708	4e-12	9.31e-11		metallo ase	NAS4_CAEELZinc metallo ase nas-4 OS=Caenorhabditis elegans OX=6239 GN=nas-4 PE=2 SV=4	INVnr_XP_001850227.1_metalloproteinase_[Culex_quinquefasciatus]
CPIJ002726	lipase 3 precursor	34.4314	3.51731	0.409269	8.59415	8.39e-18	4.08e-16		lipase 3	LIP3_DROMELipase 3 OS=Drosophila melanogaster OX=7227 GN=Lip3 PE=2 SV=1	INVnr_XP_001844309.1_lipase_3_[Culex_quinquefasciatus]
CPIJ014889	pyruvate dehydrogenase	8.26228	3.466	0.587525	5.89933	3.65e-09	5.4e-08	cqu00010,cqu00020,cqu00620,cqu01100,cqu01200	pyruvate dehydrogenase	ODPT_ASCSUPyruvate dehydrogenase E1 component subunit alpha type mitochondrial (Fragment) OS=Ascaris suum OX=6253 PE=2 SV=1	INVnr_XP_001864937.1_pyruvate_dehydrogenase_[Culex_quinquefasciatus]
CPIJ016451	crotonobetainyl-CoA dehydrogenase	574.346	3.39962	0.15887	21.3988	1.37e-101	3.22e-98	cqu00071,cqu01100,cqu01212	crotonobetainyl- dehydrogenase	ACADV_MOUSEVery long-chain specific acyl- mitochondrial OS=Mus musculus OX=10090 GN=Acadvl PE=1 SV=3	INVnr_XP_001866600.1_crotonobetainyl-CoA_dehydrogenase_[Culex_quinquefasciatus]
CPIJ011083	heat shock protein 70 B2	99.772	3.37451	0.648427	5.20415	1.95e-07	2.01e-06	cqu03040,cqu04141,cqu04144,cqu04213	heat shock 70 B2	HSP74_ANOALHeat shock 70 B2 OS=Anopheles albimanus OX=7167 GN=HSP70B2 PE=3 SV=1	INVnr_XP_001861438.1_heat_shock_protein_70_B2_[Culex_quinquefasciatus]
CPIJ008888	conserved hypothetical protein	71.6929	3.36708	0.303125	11.1079	1.15e-28	1.4e-26		p53 and DNA damage-regulated 1	PDRG1_HUMANp53 and DNA damage-regulated 1 OS=Homo sapiens OX=9606 GN=PDRG1 PE=1 SV=2	INVnr_XP_001850500.1_conserved_hypothetical_protein_[Culex_quinquefasciatus]
CPIJ015727	apolipoprotein D, putative	86.8937	3.34102	0.534779	6.24748	4.17e-10	7.18e-09		apolipo D	APOD_CAVPOApolipo D OS=Cavia porcellus OX=10141 GN=APOD PE=2 SV=1	INVnr_XP_001866789.1_apolipoprotein_D_[Culex_quinquefasciatus]
CPIJ004369	glucosyl transferase	65.2563	3.31437	0.47712	6.94663	3.74e-12	8.78e-11	cqu00040,cqu00053,cqu00830,cqu00860,cqu00980,cqu00982,cqu00983,cqu01100	2-hydroxyacylsphingosine 1-beta-galactosyltransferase-like	UD17C_MOUSEUDP-glucuronosyltransferase 1-7C OS=Mus musculus OX=10090 GN=Ugt1a7c PE=1 SV=1	INVnr_XP_001846128.1_glucosyl_transferase_[Culex_quinquefasciatus]
CPIJ014496	conserved hypothetical protein	207.547	3.29745	0.412624	7.99141	1.33e-15	5.08e-14		transient receptor potential cation channel painless	---NA---	INVnr_XP_001864790.1_conserved_hypothetical_protein_[Culex_quinquefasciatus]	Transient receptor potential cation channel protein
CPIJ004637	glutactin precursor	559.591	3.21904	0.186263	17.2822	6.4e-67	5.01e-64		glutactin	GLT_DROMEGlutactin OS=Drosophila melanogaster OX=7227 GN=Glt PE=1 SV=2	INVnr_XP_001846172.1_glutactin_[Culex_quinquefasciatus]
CPIJ013192	conserved hypothetical protein	6.67114	3.19995	0.599745	5.33552	9.53e-08	1.05e-06		conserved hypothetical protein	---NA---	INVnr_XP_001864103.1_conserved_hypothetical_protein_[Culex_quinquefasciatus]
CPIJ015075	heat shock protein 83	1026.23	3.16434	0.376817	8.39755	4.56e-17	2.1e-15	cqu04141	heat shock 83	HSP83_ANOGAHeat shock 83 OS=Anopheles gambiae OX=7165 GN=Hsp83 PE=3 SV=3	INVnr_XP_001865484.1_heat_shock_protein_83_[Culex_quinquefasciatus]
CPIJ018427	nuclear pore complex protein nup93	4.74429	3.13816	0.630494	4.9773	6.45e-07	5.98e-06		nuclear pore complex nup93	NU931_DROMENuclear pore complex Nup93-1 OS=Drosophila melanogaster OX=7227 GN=Nup93-1 PE=1 SV=1	INVnr_XP_001868558.1_nuclear_pore_complex_protein_nup93_[Culex_quinquefasciatus]
CPIJ017588	peroxidase precursor	7.95668	3.13494	0.577509	5.42839	5.69e-08	6.57e-07		peroxidase	PERO_DROMEPeroxidase OS=Drosophila melanogaster OX=7227 GN=Pxd PE=2 SV=2	INVnr_XP_001867956.1_peroxidase_[Culex_quinquefasciatus]
CPIJ011585	glutamate-cysteine ligase	582.14	3.12093	0.452804	6.89244	5.48e-12	1.25e-10	cqu00270,cqu00480,cqu01100	glutamate--cysteine ligase	GSH1_DROMEGlutamate--cysteine ligase OS=Drosophila melanogaster OX=7227 GN=Gclc PE=2 SV=1	INVnr_XP_001862212.1_glutamate-cysteine_ligase_[Culex_quinquefasciatus]
CPIJ019704	CYP6N24: cytochrome P450 6N24	11.3838	3.11655	0.542123	5.74878	8.99e-09	1.24e-07		cytochrome P450 6A1	C6A17_DROMEProbable cytochrome P450 6a17 OS=Drosophila melanogaster OX=7227 GN=Cyp6a17 PE=2 SV=1	INVnr_XP_001870176.1_cytochrome_P450_6A1_[Culex_quinquefasciatus]
CPIJ019567	vegetatible incompatibility protein HET-E-1, putative	6.04314	3.08218	0.603182	5.10987	3.22e-07	3.19e-06		vegetatible incompatibility HET-E-1	---NA---	INVnr_XP_001869783.1_vegetatible_incompatibility_protein_HET-E-1_[Culex_quinquefasciatus]
CPIJ011244	heat shock protein 83	515.245	3.05189	0.404552	7.54389	4.56e-14	1.43e-12	cqu04141	heat shock 83	HSP83_ANOGAHeat shock 83 OS=Anopheles gambiae OX=7165 GN=Hsp83 PE=3 SV=3	INVnr_XP_001861926.1_heat_shock_protein_83_[Culex_quinquefasciatus]
CPIJ002042	translocon-associated protein, delta subunit	5.69155	3.03776	0.605989	5.01289	5.36e-07	5.08e-06	cqu04141	translocon-associated delta subunit	SSRD_PONABTranslocon-associated subunit delta OS=Pongo abelii OX=9601 GN=SSR4 PE=2 SV=2	INVnr_XP_001843582.1_translocon-associated_protein,_delta_subunit_[Culex_quinquefasciatus]
CPIJ008831	Pupal cuticle protein, putative	11.5104	2.99663	0.525268	5.70495	1.16e-08	1.58e-07		Pupal cuticle	CU22_BOMMOLarval cuticle LCP-22 OS=Bombyx mori OX=7091 GN=LCP22 PE=2 SV=1	INVnr_XP_001850720.1_Pupal_cuticle_protein_[Culex_quinquefasciatus]
CPIJ006509	tetratricopeptide repeat protein, putative	8.2608	2.95767	0.557299	5.30716	1.11e-07	1.2e-06		Bardet-Biedl syndrome 4 homolog	BBS4_DROMEBardet-Biedl syndrome 4 homolog OS=Drosophila melanogaster OX=7227 GN=BBS4 PE=3 SV=1	INVnr_XP_001848193.1_tetratricopeptide_repeat_protein_[Culex_quinquefasciatus]
CPIJ005643	protein lethal(2)essential for life	61.1842	2.95325	0.646723	4.56648	4.96e-06	3.8e-05		lethal(2)essential for life	L2EFL_DROME lethal(2)essential for life OS=Drosophila melanogaster OX=7227 GN=l(2)efl PE=1 SV=1	INVnr_XP_001847192.1_lethal(2)essential_for_life_[Culex_quinquefasciatus]
CPIJ004230	lipase	308.78	2.94385	0.165184	17.8217	4.8e-71	4.22e-68		lipase member H	PLA1A_BOVINPhospholipase A1 member A OS=Bos taurus OX=9913 GN=PLA1A PE=2 SV=1	INVnr_XP_001845810.1_lipase_[Culex_quinquefasciatus]
CPIJ002307	conserved hypothetical protein	13.0682	2.92286	0.486068	6.01328	1.82e-09	2.84e-08		conserved hypothetical protein	---NA---	INVnr_XP_001843976.1_conserved_hypothetical_protein_[Culex_quinquefasciatus]
CPIJ001351	conserved hypothetical protein	10.4032	2.90557	0.518848	5.60004	2.14e-08	2.74e-07		conserved hypothetical protein	YAO3_SCHPOUncharacterized protein C11D3.03c OS=Schizosaccharomyces pombe (strain 972 / ATCC 24843) OX=284812 GN=SPAC11D3.03c PE=4 SV=1	INVnr_XP_001843129.1_conserved_hypothetical_protein_[Culex_quinquefasciatus]
CPIJ005505	hypothetical protein	29.6161	2.90278	0.363407	7.98768	1.38e-15	5.21e-14		hypothetical protein CpipJ_CPIJ005505	---NA---	INVnr_XP_001846982.1_hypothetical_protein_CpipJ_CPIJ005505_[Culex_quinquefasciatus]
CPIJ017076	conserved hypothetical protein	138.297	2.88131	0.212786	13.5409	8.97e-42	2.43e-39		conserved hypothetical protein	---NA---	INVnr_XP_001867206.1_conserved_hypothetical_protein_[Culex_quinquefasciatus]
CPIJ015686	cyclopentanol dehydrogenase	121.553	2.87639	0.215495	13.3479	1.22e-40	3.18e-38		cyclopentanol dehydrogenase	DHB14_HUMAN17-beta-hydroxysteroid dehydrogenase 14 OS=Homo sapiens OX=9606 GN=HSD17B14 PE=1 SV=1	INVnr_XP_001866147.1_cyclopentanol_dehydrogenase_[Culex_quinquefasciatus]
CPIJ014194	conserved hypothetical protein	589.731	2.87488	0.182543	15.7491	6.97e-56	3.51e-53		conserved hypothetical protein	---NA---	INVnr_XP_001864223.1_conserved_hypothetical_protein_[Culex_quinquefasciatus]
CPIJ016852	CYP6N19: cytochrome P450 6N19	238.253	2.8748	0.462117	6.22093	4.94e-10	8.39e-09		cytochrome P450 6B5	C6A14_DROMEProbable cytochrome P450 6a14 OS=Drosophila melanogaster OX=7227 GN=Cyp6a14 PE=3 SV=2	INVnr_XP_001867277.1_cytochrome_P450_6B5_[Culex_quinquefasciatus]
CPIJ010149	conserved hypothetical protein	6.53367	2.84876	0.589233	4.83469	1.33e-06	1.16e-05		KRTCAP2 homolog	KTAP2_AEDAE KRTCAP2 homolog OS=Aedes aegypti OX=7159 GN=AAEL007634 PE=2 SV=1	INVnr_XP_001854065.1_conserved_hypothetical_protein_[Culex_quinquefasciatus]
CPIJ001801	endocuticle structural glycoprotein SgAbd-1	13.7677	2.84417	0.649335	4.38012	1.19e-05	8.36e-05		endocuticle structural glyco bd-1	CUD1_SCHGREndocuticle structural glyco bd-1 OS=Schistocerca gregaria OX=7010 PE=1 SV=1	INVnr_XP_001843475.1_endocuticle_structural_glycoprotein_SgAbd-1_[Culex_quinquefasciatus]
CPIJ018848	mitochondrial protein import protein MAS5	771.913	2.83772	0.329729	8.60624	7.55e-18	3.72e-16		mitochondrial import MAS5	DNAJ1_DROME homolog 1 OS=Drosophila melanogaster OX=7227 GN= -1 PE=1 SV=3	INVnr_XP_001869188.1_mitochondrial_protein_import_protein_MAS5_[Culex_quinquefasciatus]
CPIJ011276	zinc metalloproteinase nas-4 precursor	23.5083	2.83551	0.40077	7.07515	1.49e-12	3.8e-11		zinc metallo ase nas-4	ASTL_MOUSEAstacin-like metalloendopeptidase OS=Mus musculus OX=10090 GN=Astl PE=1 SV=3	INVnr_XP_001861558.1_zinc_metalloproteinase_nas-4_[Culex_quinquefasciatus]
CPIJ009924	conserved hypothetical protein	7.51387	2.83495	0.562571	5.03927	4.67e-07	4.48e-06		ion channel nompc	V240_FOWPN ankyrin repeat FPV240 OS=Fowlpox virus (strain NVSL) OX=928301 GN=FPV240 PE=4 SV=1	INVnr_XP_001870721.1_conserved_hypothetical_protein_[Culex_quinquefasciatus]
CPIJ000565	conserved hypothetical protein	25.6705	2.80063	0.383165	7.3092	2.69e-13	7.51e-12		conserved hypothetical protein	---NA---	INVnr_XP_001842328.1_conserved_hypothetical_protein_[Culex_quinquefasciatus]
CPIJ004873	conserved hypothetical protein	53.6283	2.77194	0.335816	8.25433	1.53e-16	6.64e-15		RING finger and SPRY domain-containing 1	RSPRY_MOUSERING finger and SPRY domain-containing 1 OS=Mus musculus OX=10090 GN=Rspry1 PE=1 SV=1	INVnr_XP_001846522.1_conserved_hypothetical_protein_[Culex_quinquefasciatus]
CPIJ000564	conserved hypothetical protein	11.8447	2.7573	0.500109	5.5134	3.52e-08	4.3e-07		conserved hypothetical protein	---NA---	INVnr_XP_001842327.1_conserved_hypothetical_protein_[Culex_quinquefasciatus]
CPIJ013743	integrin beta-1-binding protein 2	31.3354	2.75285	0.359395	7.65968	1.86e-14	6.11e-13		integrin beta-1-binding 2	CHRD1_DROMECysteine and histidine-rich domain-containing OS=Drosophila melanogaster OX=7227 GN=CHORD PE=1 SV=1	INVnr_XP_001864518.1_integrin_beta-1-binding_protein_2_[Culex_quinquefasciatus]
CPIJ004287	conserved hypothetical protein	35.2389	2.72373	0.645077	4.22233	2.42e-05	0.000156971		cuticular RR-2 family	CU21_LOCMICuticle 21 OS=Locusta migratoria OX=7004 GN=ACP21 PE=1 SV=1	INVnr_XP_001688326.1_AGAP003390-PA_[Anopheles_gambiae_str._PEST]
CPIJ003266	CCAAT/enhancer-binding protein	80.8012	2.72319	0.26496	10.2777	8.88e-25	8.94e-23		CCAAT enhancer-binding	CEBP_DROMECCAAT enhancer-binding OS=Drosophila melanogaster OX=7227 GN=slbo PE=1 SV=3	INVnr_XP_001844637.1_CCAAT/enhancer-binding_protein_[Culex_quinquefasciatus]
CPIJ003550	78 kDa glucose-regulated protein precursor	1641.92	2.71913	0.151285	17.9735	3.14e-72	3.16e-69	cqu03060,cqu04141	heat shock 70 kDa cognate 3	BIP_DROMEEndoplasmic reticulum chaperone OS=Drosophila melanogaster OX=7227 GN=Hsc70-3 PE=1 SV=2	INVnr_XP_001845218.1_78_kDa_glucose-regulated_protein_[Culex_quinquefasciatus]
CPIJ018159	fibrinogen and fibronectin	39.111	2.70841	0.328349	8.24857	1.6e-16	6.89e-15		fibrinogen and fibronectin	FCN1_PIGFicolin-1 OS=Sus scrofa OX=9823 GN=FCN1 PE=1 SV=1	INVnr_XP_001868568.1_fibrinogen_and_fibronectin_[Culex_quinquefasciatus]
CPIJ012697	conserved hypothetical protein	32.5044	2.69995	0.581931	4.63963	3.49e-06	2.74e-05		conserved hypothetical protein	---NA---	INVnr_XP_001863903.1_conserved_hypothetical_protein_[Culex_quinquefasciatus]
CPIJ005455	zinc finger protein 14	147.846	2.68951	0.234899	11.4497	2.36e-30	3.39e-28		zinc finger 14	SCRT1_MOUSETranscriptional repressor scratch 1 OS=Mus musculus OX=10090 GN=Scrt1 PE=1 SV=1	INVnr_XP_001847117.1_zinc_finger_protein_14_[Culex_quinquefasciatus]
CPIJ004285	neural/ectodermal development factor IMP-L2 precursor	16.4448	2.66298	0.444866	5.98603	2.15e-09	3.31e-08		neural ectodermal development factor IMP-L2	IMPL2_DROMENeural ectodermal development factor IMP-L2 OS=Drosophila melanogaster OX=7227 GN= 2 PE=1 SV=4	INVnr_XP_001845927.1_neural/ectodermal_development_factor_IMP-L2_[Culex_quinquefasciatus]
CPIJ019470	3-demethylubiquinone-9 3-methyltransferase	120.335	2.66059	0.271258	9.80833	1.04e-22	8.49e-21		---NA---	COQ3_RATUbiquinone biosynthesis O- mitochondrial OS=Rattus norvegicus OX=10116 GN=Coq3 PE=2 SV=2	INVnr_XP_001869688.1_3-demethylubiquinone-9_3-methyltransferase_[Culex_quinquefasciatus]
CPIJ002309	conserved hypothetical protein	68.9789	2.62683	0.260407	10.0874	6.28e-24	5.75e-22		conserved hypothetical protein	---NA---	INVnr_XP_001843978.1_conserved_hypothetical_protein_[Culex_quinquefasciatus]
CPIJ015947	purine nucleoside phosphorylase	6.35747	2.62318	0.57122	4.59223	4.39e-06	3.39e-05	cqu00230,cqu00240,cqu00760,cqu01100	purine nucleoside phosphorylase	PNPH_BOVINPurine nucleoside phosphorylase OS=Bos taurus OX=9913 GN=PNP PE=1 SV=3	INVnr_XP_001866321.1_purine_nucleoside_phosphorylase_[Culex_quinquefasciatus]
CPIJ004733	predicted protein	3176.62	2.60726	0.119163	21.8798	4.05e-106	1.43e-102		glutamic acid-rich -like isoform X2	---NA---	INVnr_XP_001846757.1_predicted_protein_[Culex_quinquefasciatus]
CPIJ007228	heat shock protein, putative	296.092	2.57973	0.217168	11.879	1.52e-32	2.55e-30		heat shock	CH10_SCHJA10 kDa heat shock mitochondrial OS=Schistosoma japonicum OX=6182 GN=SJCHGC01960 PE=3 SV=2	INVnr_XP_001848951.1_heat_shock_protein_[Culex_quinquefasciatus]
CPIJ005644	protein lethal(2)essential for life	404.956	2.57496	0.65535	3.92915	8.52e-05	0.000478095		lethal(2)essential for life	L2EFL_DROME lethal(2)essential for life OS=Drosophila melanogaster OX=7227 GN=l(2)efl PE=1 SV=1	INVnr_XP_001847193.1_lethal(2)essential_for_life_[Culex_quinquefasciatus]
CPIJ002678	glutathione transferase I	175.909	2.5746	0.235879	10.9149	9.78e-28	1.13e-25		glutathione transferase I	GSTT1_MUSDOGlutathione S-transferase 1 OS=Musca domestica OX=7370 GN=Gst1 PE=2 SV=1	INVnr_XP_001844261.1_glutathione_transferase_I_[Culex_quinquefasciatus]
CPIJ018626	glutathione-s-transferase theta, gst	157.588	2.5547	0.398634	6.40864	1.47e-10	2.68e-09		glutathione-s-transferase gst	GSTT1_MANSEGlutathione S-transferase 1 OS=Manduca sexta OX=7130 GN=GST1 PE=2 SV=1	INVnr_XP_001868769.1_glutathione-s-transferase_theta,_gst_[Culex_quinquefasciatus]
CPIJ015920	conserved hypothetical protein	7.96521	2.5296	0.534268	4.7347	2.19e-06	1.83e-05		conserved hypothetical protein	---NA---	INVnr_XP_001866186.1_conserved_hypothetical_protein_[Culex_quinquefasciatus]
CPIJ012919	GDP-mannose 4,6 dehydratase	14.9813	2.49899	0.447182	5.58832	2.29e-08	2.92e-07	cqu00051,cqu00520,cqu01100	GDP-mannose 4,6 dehydratase	GMDS_DROMEGDP-mannose 4,6 dehydratase OS=Drosophila melanogaster OX=7227 GN=Gmd PE=1 SV=2	INVnr_XP_001863206.1_GDP-mannose_4,6_dehydratase_[Culex_quinquefasciatus]
CPIJ002957	sugar transporter	6.63401	2.48385	0.56331	4.40939	1.04e-05	7.4e-05		sugar transporter	TRET1_BOMMOFacilitated trehalose transporter Tret1 OS=Bombyx mori OX=7091 GN=Tret1 PE=1 SV=1	INVnr_XP_001844575.1_sugar_transporter_[Culex_quinquefasciatus]
CPIJ015110	synaptic vesicle protein	12.4822	2.47851	0.467837	5.29781	1.17e-07	1.26e-06		synaptic vesicle	SV2B_MOUSESynaptic vesicle glyco 2B OS=Mus musculus OX=10090 GN=Sv2b PE=1 SV=1	INVnr_XP_001865146.1_synaptic_vesicle_protein_[Culex_quinquefasciatus]
CPIJ002605	protein serine/threonine kinase, putative	41.1171	2.47699	0.300255	8.24963	1.59e-16	6.87e-15		serine threonine kinase	PEB3_DROMEEjaculatory bulb-specific 3 OS=Drosophila melanogaster OX=7227 GN= PE=2 SV=2	INVnr_XP_001844674.1_serine/threonine_kinase_[Culex_quinquefasciatus]
CPIJ013278	conserved hypothetical protein	62.0436	2.47659	0.611892	4.04743	5.18e-05	0.000308858		conserved hypothetical protein	---NA---	INVnr_XP_001863630.1_conserved_hypothetical_protein_[Culex_quinquefasciatus]
CPIJ005646	alphaA-crystallin, putative	473.247	2.46177	0.654201	3.76302	0.000167875	0.000861889		lethal(2)essential for life	L2EFL_DROME lethal(2)essential for life OS=Drosophila melanogaster OX=7227 GN=l(2)efl PE=1 SV=1	INVnr_XP_001847195.1_alphaA-crystallin_[Culex_quinquefasciatus]
CPIJ011181	oligoribonuclease	10.3584	2.45721	0.493359	4.98057	6.34e-07	5.89e-06	cqu03008	oligoribonuclease-like isoform X1	mitochondrial OS=Homo sapiens OX=9606 GN=REXO2 PE=1 SV=3	INVnr_XP_001859612.1_oligoribonuclease_[Culex_quinquefasciatus]
CPIJ011590	conserved hypothetical protein	88.7118	2.45075	0.227199	10.7868	3.97e-27	4.44e-25		probable serine threonine- kinase DDB_G0282963	---NA---	INVnr_XP_001862217.1_conserved_hypothetical_protein_[Culex_quinquefasciatus]
CPIJ005508	DNA-J/hsp40	97.9289	2.45032	0.224995	10.8906	1.28e-27	1.45e-25	cqu04141	DNA-J hsp40	DJSHV_DROME homolog shv OS=Drosophila melanogaster OX=7227 GN=shv PE=1 SV=1	INVnr_XP_001846985.1_DNA-J/hsp40_[Culex_quinquefasciatus]
CPIJ006316	conserved hypothetical protein	162.203	2.45003	0.513424	4.77194	1.82e-06	1.54e-05		interferon-related developmental regulator 2-like	IFRD1_MOUSEInterferon-related developmental regulator 1 OS=Mus musculus OX=10090 GN=Ifrd1 PE=1 SV=2	INVnr_XP_001848022.1_conserved_hypothetical_protein_[Culex_quinquefasciatus]
CPIJ010531	ABC1 family protein	47.597	2.40628	0.337052	7.13918	9.39e-13	2.45e-11		uncharacterized aarF domain-containing kinase 1	ADCK1_MOUSEUncharacterized aarF domain-containing kinase 1 OS=Mus musculus OX=10090 GN=Adck1 PE=1 SV=1	INVnr_XP_001855172.1_ABC1_family_protein_[Culex_quinquefasciatus]
CPIJ007525	conserved hypothetical protein	69.8143	2.38658	0.250742	9.51807	1.76e-21	1.22e-19		conserved hypothetical protein	GILT1_DROMEGILT 1 OS=Drosophila melanogaster OX=7227 GN=GILT1 PE=2 SV=1	INVnr_XP_001849339.1_conserved_hypothetical_protein_[Culex_quinquefasciatus]
CPIJ002956	sugar transporter	7.31964	2.35339	0.547649	4.29726	1.73e-05	0.000116559		sugar transporter	TRET1_DROVIFacilitated trehalose transporter Tret1 OS=Drosophila virilis OX=7244 GN=Tret1 PE=3 SV=2	INVnr_XP_001844574.1_sugar_transporter_[Culex_quinquefasciatus]
CPIJ011623	conserved hypothetical protein	374.578	2.34952	0.185035	12.6977	6.09e-37	1.23e-34		conserved hypothetical protein	PE1_ANOGAPeritrophin-1 OS=Anopheles gambiae OX=7165 GN=Aper1 PE=2 SV=2	INVnr_XP_001861680.1_conserved_hypothetical_protein_[Culex_quinquefasciatus]
CPIJ009333	cuticle protein, putative	104.221	2.30233	0.254668	9.04051	1.56e-19	9.23e-18		cuticle -like	CUD2_SCHGREndocuticle structural glyco bd-2 OS=Schistocerca gregaria OX=7010 PE=1 SV=1	INVnr_XP_001851258.1_cuticle_protein_[Culex_quinquefasciatus]
CPIJ018241	microsomal glutathione S-transferase 1	295.42	2.28286	0.167228	13.6512	1.99e-42	5.6e-40	cqu00480,cqu00980,cqu00982	microsomal glutathione S-transferase 1-like	MGST1_MOUSEMicrosomal glutathione S-transferase 1 OS=Mus musculus OX=10090 GN=Mgst1 PE=1 SV=3	INVnr_XP_001868657.1_microsomal_glutathione_S-transferase_1_[Culex_quinquefasciatus]
CPIJ007946	conserved hypothetical protein	66.3999	2.27843	0.469103	4.857	1.19e-06	1.04e-05		erythroid differentiation-related factor 1	EDRF1_PONABErythroid differentiation-related factor 1 OS=Pongo abelii OX=9601 GN=EDRF1 PE=2 SV=1	INVnr_XP_001849748.1_conserved_hypothetical_protein_[Culex_quinquefasciatus]
CPIJ012908	glutaminyl-peptide cyclotransferase	19.0073	2.27756	0.399983	5.69414	1.24e-08	1.67e-07		glutaminyl-peptide cyclotransferase	QPCT_MOUSEGlutaminyl-peptide cyclotransferase OS=Mus musculus OX=10090 GN=Qpct PE=1 SV=2	INVnr_XP_001863195.1_glutaminyl-peptide_cyclotransferase_[Culex_quinquefasciatus]
CPIJ005830	glutaredoxin, putative	97.1327	2.27485	0.486903	4.67209	2.98e-06	2.39e-05		thioredoxin domain-containing 17	TXD17_DANREThioredoxin domain-containing 17 OS=Danio rerio OX=7955 GN=txndc17 PE=2 SV=1	INVnr_XP_001847851.1_glutaredoxin_[Culex_quinquefasciatus]
CPIJ001776	synaptic vesicle protein, putative	17.9024	2.27404	0.41729	5.44956	5.05e-08	5.9e-07		synaptic vesicle	SV2B_HUMANSynaptic vesicle glyco 2B OS=Homo sapiens OX=9606 GN=SV2B PE=1 SV=1	INVnr_XP_001843450.1_synaptic_vesicle_protein_[Culex_quinquefasciatus]
CPIJ005558	conserved hypothetical protein	33.7053	2.27222	0.333182	6.81975	9.12e-12	2.02e-10		conserved hypothetical protein	---NA---	INVnr_XP_001847798.1_conserved_hypothetical_protein_[Culex_quinquefasciatus]
CPIJ006569	glutaminase	29.4083	2.26873	0.574426	3.94956	7.83e-05	0.00044441	cqu00220,cqu00250,cqu00471,cqu01100	glutaminase kidney mitochondrial-like isoform X3	GLSK_RATGlutaminase kidney mitochondrial OS=Rattus norvegicus OX=10116 GN=Gls PE=1 SV=2	INVnr_XP_001848066.1_glutaminase_[Culex_quinquefasciatus]
CPIJ019024	cytochrome c	1019.98	2.23385	0.108383	20.6107	2.2e-94	3.87e-91	cqu00920,cqu01100,cqu04214,cqu04215	cytochrome c-2	CYC2_DROMECytochrome c-2 OS=Drosophila melanogaster OX=7227 GN=Cyt-c-p PE=1 SV=2	INVnr_XP_001869210.1_cytochrome_c_[Culex_quinquefasciatus]
CPIJ005818	13 kDa ribonucleoprotein-associated protein	52.7788	2.22994	0.281431	7.92357	2.31e-15	8.47e-14	cqu03008,cqu03040	NHP2 1 homolog	NH2L1_DROMENHP2 1 homolog OS=Drosophila melanogaster OX=7227 GN=hoip PE=2 SV=1	INVnr_XP_019526231.1_PREDICTED:_NHP2-like_protein_1_homolog_[Aedes_albopictus]
CPIJ020078	conserved hypothetical protein	9.01752	2.20861	0.509976	4.33082	1.49e-05	0.000102684		conserved hypothetical protein	---NA---	INVnr_XP_001870611.1_conserved_hypothetical_protein_[Culex_quinquefasciatus]
CPIJ000151	sodium/solute symporter	125.609	2.20622	0.210627	10.4745	1.13e-25	1.21e-23		sodium solute symporter	SC5AC_BOVINSodium-coupled monocarboxylate transporter 2 OS=Bos taurus OX=9913 GN=SLC5A12 PE=2 SV=1	INVnr_XP_001841916.1_sodium/solute_symporter_[Culex_quinquefasciatus]
CPIJ009240	ganglioside-induced differentiation-associated protein 1	26.8356	2.20415	0.354131	6.22412	4.84e-10	8.26e-09		ganglioside-induced differentiation-associated 1	GDAP1_BOVINGanglioside-induced differentiation-associated 1 OS=Bos taurus OX=9913 GN=GDAP1 PE=2 SV=1	INVnr_XP_001851150.1_ganglioside-induced_differentiation-associated_protein_1_[Culex_quinquefasciatus]
CPIJ007080	trypsin-1 precursor	30.3375	2.20276	0.337395	6.52873	6.63e-11	1.29e-09	cqu04080	trypsin-1	TRY1_ANOGATrypsin-1 OS=Anopheles gambiae OX=7165 GN=TRYP1 PE=2 SV=3	INVnr_XP_001848609.1_trypsin-1_[Culex_quinquefasciatus]
CPIJ011246	heat shock protein 83	445.996	2.1985	0.380889	5.77203	7.83e-09	1.1e-07	cqu04141	heat shock 83	HSP83_ANOGAHeat shock 83 OS=Anopheles gambiae OX=7165 GN=Hsp83 PE=3 SV=3	INVnr_XP_001861928.1_heat_shock_protein_83_[Culex_quinquefasciatus]
CPIJ013810	cartilage associated protein	9.20947	2.19622	0.510509	4.30203	1.69e-05	0.000114408		cartilage associated	P3H1_MOUSEProlyl 3-hydroxylase 1 OS=Mus musculus OX=10090 GN=P3h1 PE=1 SV=2	INVnr_XP_001863789.1_cartilage_associated_protein_[Culex_quinquefasciatus]
CPIJ008889	60 kDa heat shock protein, mitochondrial precursor	211.171	2.18578	0.375563	5.82003	5.88e-09	8.39e-08	cqu03018	60 kDa heat shock mitochondrial	CH60A_DROMEHeat shock 60A OS=Drosophila melanogaster OX=7227 GN=Hsp60A PE=1 SV=3	INVnr_XP_001850501.1_60_kDa_heat_shock_protein,_mitochondrial_[Culex_quinquefasciatus]
CPIJ000150	conserved hypothetical protein	33.526	2.17562	0.349595	6.22324	4.87e-10	8.29e-09		sodium-coupled monocarboxylate transporter 1	---NA---	INVnr_XP_001841915.1_conserved_hypothetical_protein_[Culex_quinquefasciatus]
CPIJ007938	asparagine synthetase B	18.317	2.17448	0.402561	5.40161	6.6e-08	7.54e-07	cqu00250,cqu01100	asparagine synthetase B	ASNS_DICDIProbable asparagine synthetase	INVnr_XP_001849740.1_asparagine_synthetase_B_[Culex_quinquefasciatus]
CPIJ009064	abhydrolase domain-containing protein 4	155.492	2.16909	0.243742	8.8991	5.63e-19	3.17e-17		abhydrolase domain-containing 4	ABHD4_MOUSE ABHD4 OS=Mus musculus OX=10090 GN=Abhd4 PE=1 SV=1	INVnr_XP_001850602.1_abhydrolase_domain-containing_protein_4_[Culex_quinquefasciatus]
CPIJ005586	histidine triad protein member	26.7798	2.15862	0.398932	5.41099	6.27e-08	7.18e-07	cqu03018	histidine triad member	DCPS_BOVINm7 diphosphatase OS=Bos taurus OX=9913 GN=DCPS PE=2 SV=1	INVnr_XP_001847826.1_histidine_triad_protein_member_[Culex_quinquefasciatus]
CPIJ004226	pancreatic triacylglycerol lipase	18.5913	2.15201	0.400661	5.37115	7.82e-08	8.8e-07		pancreatic triacylglycerol lipase	LIPR2_MOUSEPancreatic lipase-related 2 OS=Mus musculus OX=10090 GN=Pnliprp2 PE=1 SV=2	INVnr_XP_001845806.1_pancreatic_triacylglycerol_lipase_[Culex_quinquefasciatus]
CPIJ015106	tonin precursor	78.2096	2.14138	0.228626	9.36632	7.51e-21	5.09e-19		trypsin alpha-3	KLK2_RATTonin OS=Rattus norvegicus OX=10116 GN=Klk2 PE=1 SV=1	INVnr_XP_001865142.1_tonin_[Culex_quinquefasciatus]
CPIJ011600	long-chain-fatty-acid coa ligase	162.561	2.14113	0.229659	9.32308	1.13e-20	7.58e-19	cqu00061,cqu00071,cqu01100,cqu01212,cqu04146	long-chain-fatty-acid coa ligase	ACSL6_MOUSELong-chain-fatty-acid-- ligase 6 OS=Mus musculus OX=10090 GN=Acsl6 PE=1 SV=1	INVnr_XP_001862260.1_long-chain-fatty-acid_coa_ligase_[Culex_quinquefasciatus]
CPIJ009018	fibrinogen and fibronectin	6.07547	2.14031	0.553108	3.8696	0.000109014	0.00059527		fibrinogen and fibronectin	TENA_CHICKTenascin OS=Gallus gallus OX=9031 GN=TNC PE=1 SV=2	INVnr_XP_001850686.1_fibrinogen_and_fibronectin_[Culex_quinquefasciatus]
CPIJ015728	conserved hypothetical protein	10.0474	2.12703	0.478935	4.44117	8.95e-06	6.47e-05		outer membrane lipo Blc isoform X1	BLC_CITFROuter membrane lipo Blc OS=Citrobacter freundii OX=546 PE=3 SV=1	INVnr_XP_001866791.1_conserved_hypothetical_protein_[Culex_quinquefasciatus]
CPIJ009003	conserved hypothetical protein	73.6582	2.12283	0.232131	9.14495	5.97e-20	3.72e-18		sulfiredoxin isoform X3	SRX_DROME sulfiredoxin OS=Drosophila melanogaster OX=7227 GN=CG6762 PE=2 SV=1	INVnr_XP_001850565.1_conserved_hypothetical_protein_[Culex_quinquefasciatus]
CPIJ011247	heat shock protein 82	38.7981	2.11828	0.321677	6.58512	4.55e-11	9.12e-10		heat shock 82	HSP83_DROMIHeat shock 83 (Fragment) OS=Drosophila miranda OX=7229 GN=Hsp83 PE=3 SV=1	INVnr_XP_001861929.1_heat_shock_protein_82_[Culex_quinquefasciatus]
CPIJ007989	porphobilinogen deaminase	39.471	2.09143	0.313399	6.67338	2.5e-11	5.19e-10	cqu00860,cqu01100	porphobilinogen deaminase	HEM3_BOVINPorphobilinogen deaminase OS=Bos taurus OX=9913 GN=HMBS PE=2 SV=1	INVnr_XP_001849943.1_porphobilinogen_deaminase_[Culex_quinquefasciatus]
CPIJ017844	Tetratricopeptide repeat protein, putative	120.93	2.07959	0.217489	9.56186	1.16e-21	8.4e-20	cqu04141	Tetratricopeptide repeat	DNJC3_CHICK homolog subfamily C member 3 OS=Gallus gallus OX=9031 GN=DNAJC3 PE=2 SV=1	INVnr_XP_001868052.1_Tetratricopeptide_repeat_protein_[Culex_quinquefasciatus]
CPIJ011502	short-chain dehydrogenase	92.1466	2.06689	0.235898	8.76181	1.92e-18	1.01e-16		short-chain dehydrogenase	RDH11_HUMANRetinol dehydrogenase 11 OS=Homo sapiens OX=9606 GN=RDH11 PE=1 SV=2	INVnr_XP_001861515.1_short-chain_dehydrogenase_[Culex_quinquefasciatus]
CPIJ018084	uty-prov protein	33.5455	2.06042	0.317817	6.48305	8.99e-11	1.72e-09		histone demethylase UTY isoform X1	KDM6A_HUMANLysine-specific demethylase 6A OS=Homo sapiens OX=9606 GN=KDM6A PE=1 SV=2	INVnr_XP_001868424.1_uty-prov_protein_[Culex_quinquefasciatus]
CPIJ015367	conserved hypothetical protein	20.5432	2.05791	0.386642	5.32253	1.02e-07	1.11e-06		conserved hypothetical protein	---NA---	INVnr_XP_001865841.1_conserved_hypothetical_protein_[Culex_quinquefasciatus]
CPIJ009326	endocuticle structural glycoprotein SgAbd-4	4.11323	2.0553	0.598401	3.43466	0.000593297	0.00261036		endocuticle structural glyco bd-4	CUD2_SCHGREndocuticle structural glyco bd-2 OS=Schistocerca gregaria OX=7010 PE=1 SV=1	INVnr_XP_001851251.1_endocuticle_structural_glycoprotein_SgAbd-4_[Culex_quinquefasciatus]
CPIJ012580	Caspase-3 precursor	41.1398	2.05378	0.289961	7.08293	1.41e-12	3.6e-11	cqu04214	serine- and threonine-rich caspase 16	DRICE_DROMECaspase OS=Drosophila melanogaster OX=7227 GN=Drice PE=1 SV=2	INVnr_XP_001862816.1_Caspase-3_[Culex_quinquefasciatus]
CPIJ010187	sodium/solute symporter	19.4797	2.05265	0.411029	4.99392	5.92e-07	5.55e-06		sodium-dependent multivitamin transporter	SC5A6_DROME sodium-dependent multivitamin transporter OS=Drosophila melanogaster OX=7227 GN=CG32669 PE=2 SV=1	INVnr_XP_001857950.1_sodium/solute_symporter_[Culex_quinquefasciatus]
CPIJ002430	cytidine deaminase	42.6715	2.04617	0.311151	6.57611	4.83e-11	9.64e-10	cqu00240,cqu00983,cqu01100	cytidine deaminase	CDD_HUMANCytidine deaminase OS=Homo sapiens OX=9606 GN=CDA PE=1 SV=2	INVnr_XP_001844039.1_cytidine_deaminase_[Culex_quinquefasciatus]
CPIJ003870	acyl-CoA oxidase	15.4841	2.04134	0.416588	4.90014	9.58e-07	8.56e-06	cqu00071,cqu00592,cqu01040,cqu01100,cqu01212,cqu04146	peroxisomal acyl-coenzyme A oxidase 3	ACOX3_MOUSEPeroxisomal acyl-coenzyme A oxidase 3 OS=Mus musculus OX=10090 GN=Acox3 PE=1 SV=2	INVnr_XP_021702273.1_peroxisomal_acyl-coenzyme_A_oxidase_3_[Aedes_aegypti]
CPIJ012840	39S ribosomal protein L24, mitochondrial precursor	16.5359	2.03634	0.405558	5.02108	5.14e-07	4.88e-06	cqu03010	39S ribosomal mitochondrial	RM24_DROMEProbable 39S ribosomal mitochondrial OS=Drosophila melanogaster OX=7227 GN=m 24 PE=2 SV=1	INVnr_XP_001842014.1_39S_ribosomal_protein_L24,_mitochondrial_[Culex_quinquefasciatus]
CPIJ012180	conserved hypothetical protein	51.3941	2.03385	0.267282	7.60938	2.75e-14	8.9e-13		NPC2 homolog	NPC2_DROMENPC intracellular cholesterol transporter 2 homolog a OS=Drosophila melanogaster OX=7227 GN=Npc2a PE=2 SV=1	INVnr_XP_001862378.1_conserved_hypothetical_protein_[Culex_quinquefasciatus]
CPIJ006734	DNA-directed RNA polymerase II 16 kDa polypeptide	11.2126	2.03228	0.480024	4.23369	2.3e-05	0.000150215	cqu00230,cqu00240,cqu01100,cqu03020	DNA-directed RNA polymerase II 16 kDa polypeptide isoform X2	RPB4_DROMEDNA-directed RNA polymerase II subunit Rpb4 OS=Drosophila melanogaster OX=7227 GN=Rpb4 PE=2 SV=5	INVnr_XP_001849109.1_DNA-directed_RNA_polymerase_II_16_kDa_polypeptide_[Culex_quinquefasciatus]
CPIJ007213	conserved hypothetical protein	80.2542	2.02211	0.232962	8.67998	3.96e-18	2.02e-16		conserved hypothetical protein	MRJP2_APIMEMajor royal jelly 2 OS=Apis mellifera OX=7460 GN=MRJP2 PE=1 SV=1	INVnr_XP_001848555.1_conserved_hypothetical_protein_[Culex_quinquefasciatus]
CPIJ005064	alpha-amylase precursor	70.0803	2.0122	0.245625	8.19216	2.57e-16	1.06e-14	cqu00500,cqu01100	alpha-amylase A-like	AMYB_DROYAAlpha-amylase B OS=Drosophila yakuba OX=7245 GN=Amy-d PE=3 SV=2	INVnr_XP_001846545.1_alpha-amylase_[Culex_quinquefasciatus]
CPIJ001706	small nuclear ribonucleoprotein sm d2	24.4238	2.00476	0.352298	5.69053	1.27e-08	1.7e-07	cqu03040	probable small nuclear ribonucleo Sm D2	SMD2_DROMEProbable small nuclear ribonucleo Sm D2 OS=Drosophila melanogaster OX=7227 GN= 2 PE=1 SV=1	INVnr_XP_001843246.1_small_nuclear_ribonucleoprotein_sm_d2_[Culex_quinquefasciatus]
CPIJ016258	probable ER retained protein	50.3382	1.99991	0.266057	7.51684	5.61e-14	1.76e-12		probable ER retained	SDF2_MOUSEStromal cell-derived factor 2 OS=Mus musculus OX=10090 GN=Sdf2 PE=1 SV=1	INVnr_XP_001866801.1_probable_ER_retained_protein_[Culex_quinquefasciatus]
CPIJ004138	1-acyl-sn-glycerol-3-phosphate acyltransferase	168.691	1.9996	0.176981	11.2984	1.34e-29	1.81e-27	cqu00561,cqu00564,cqu01100	1-acyl-sn-glycerol-3-phosphate acyltransferase alpha	PLCA_HUMAN1-acyl-sn-glycerol-3-phosphate acyltransferase alpha OS=Homo sapiens OX=9606 GN=AGPAT1 PE=1 SV=2	INVnr_XP_001845864.1_1-acyl-sn-glycerol-3-phosphate_acyltransferase_[Culex_quinquefasciatus]
CPIJ010359	H4 histone	7.61522	1.99784	0.513996	3.88689	0.000101539	0.000558345		CChain Structure of the H3-H4 chaperone Asf1 bound to histones H3 and H4	H4_XENTRHistone H4 OS=Xenopus tropicalis OX=8364 GN= PE=3 SV=1	VRTnr_XP_018925819.1_PREDICTED:_histone_H4-like_[Cyprinus_carpio]
CPIJ000084	jun	81.3514	1.98934	0.23713	8.38925	4.89e-17	2.24e-15	cqu04013,cqu04137,cqu04214,cqu04310,cqu04624,cqu04933	transcription factor AP-1-like	JRA_DROMETranscription factor AP-1 OS=Drosophila melanogaster OX=7227 GN=Jra PE=1 SV=2	INVnr_XP_001841754.1_jun_[Culex_quinquefasciatus]
CPIJ001036	conserved hypothetical protein	1098.84	1.98334	0.123686	16.0353	7.24e-58	3.92e-55		lipase member H	PLA1A_BOVINPhospholipase A1 member A OS=Bos taurus OX=9913 GN=PLA1A PE=2 SV=1	INVnr_XP_001842705.1_conserved_hypothetical_protein_[Culex_quinquefasciatus]
CPIJ003399	peroxiredoxins, prx-1, prx-2, prx-3	174.573	1.98213	0.240752	8.23308	1.82e-16	7.79e-15	cqu04146	peroxiredoxin 1	PRDX1_DROMEPeroxiredoxin 1 OS=Drosophila melanogaster OX=7227 GN=Jafrac1 PE=1 SV=1	INVnr_XP_001844844.1_peroxiredoxins,_prx-1,_prx-2,_prx-3_[Culex_quinquefasciatus]
CPIJ006724	tubulin alpha-1 chain	1378.86	1.97801	0.142648	13.8664	1.01e-43	2.97e-41	cqu04145	Tubulin alpha-1 chain	TBA1_DROMETubulin alpha-1 chain OS=Drosophila melanogaster OX=7227 GN=alphaTub84B PE=1 SV=1	INVnr_XP_018305623.1_PREDICTED:_tubulin_alpha-1_chain-like_[Trachymyrmex_zeteki]
CPIJ003181	rnase h	18.601	1.97465	0.402087	4.91101	9.06e-07	8.14e-06	cqu03008	RNAse H	REXO1_MOUSERNA exonuclease 1 homolog OS=Mus musculus OX=10090 GN=Rexo1 PE=1 SV=1	INVnr_XP_001844769.1_RNAse_H_[Culex_quinquefasciatus]
CPIJ003257	conserved hypothetical protein	124.064	1.97318	0.247953	7.95787	1.75e-15	6.52e-14		oxidative stress-induced growth inhibitor 2 isoform X1	OSGI1_HUMANOxidative stress-induced growth inhibitor 1 OS=Homo sapiens OX=9606 GN=OSGIN1 PE=1 SV=3	INVnr_XP_001844628.1_conserved_hypothetical_protein_[Culex_quinquefasciatus]
CPIJ010633	conserved hypothetical protein	4.71822	1.9727	0.579691	3.40302	0.000666442	0.002896		conserved hypothetical protein	---NA---	INVnr_XP_001871006.1_conserved_hypothetical_protein_[Culex_quinquefasciatus]
CPIJ006965	conserved hypothetical protein	17.5297	1.97213	0.397846	4.95703	7.16e-07	6.59e-06		conserved hypothetical protein	CCCP_DROMECircadian clock-controlled OS=Drosophila melanogaster OX=7227 GN=anon- PE=2 SV=2	INVnr_XP_001849012.1_conserved_hypothetical_protein_[Culex_quinquefasciatus]
CPIJ019137	dihydropteridine reductase	9.20316	1.97152	0.501	3.93516	8.31e-05	0.000467015	cqu00790,cqu01100	dihydropteridine reductase	DHPR_BOVINDihydropteridine reductase OS=Bos taurus OX=9913 GN=QDPR PE=2 SV=1	INVnr_XP_001869487.1_dihydropteridine_reductase_[Culex_quinquefasciatus]
CPIJ015560	nudix hydrolase 3	4.49093	1.96236	0.582836	3.36691	0.000760143	0.00326436		nudix hydrolase 3	NUDT8_MOUSENucleoside diphosphate-linked moiety X motif 8 OS=Mus musculus OX=10090 GN=Nudt8 PE=1 SV=1	INVnr_XP_001865984.1_nudix_hydrolase_3_[Culex_quinquefasciatus]
CPIJ016853	CYP6N21P: cytochrome P450 6N21	68.1685	1.9593	0.287354	6.81842	9.2e-12	2.03e-10		cytochrome P450 4F12	C6A23_DROMEProbable cytochrome P450 6a23 OS=Drosophila melanogaster OX=7227 GN=Cyp6a23 PE=2 SV=2	INVnr_XP_001867278.1_cytochrome_P450_4F12_[Culex_quinquefasciatus]
CPIJ017744	sterol desaturase	11.5685	1.95856	0.457126	4.28451	1.83e-05	0.000122483		sterol desaturase	FXDC2_HUMANFatty acid hydroxylase domain-containing 2 OS=Homo sapiens OX=9606 GN=FAXDC2 PE=2 SV=1	INVnr_XP_001868022.1_sterol_desaturase_[Culex_quinquefasciatus]
CPIJ001310	canalicular multispecific organic anion transporter 2	49.8012	1.95527	0.530858	3.68321	0.000230311	0.00114025		multidrug resistance-associated 4	MRP4_HUMANMultidrug resistance-associated 4 OS=Homo sapiens OX=9606 GN=ABCC4 PE=1 SV=3	INVnr_XP_001843088.1_canalicular_multispecific_organic_anion_transporter_2_[Culex_quinquefasciatus]
CPIJ016941	conserved hypothetical protein	68.0357	1.95521	0.269435	7.25672	3.97e-13	1.1e-11	cqu04711	conserved hypothetical protein	NFIL3_MOUSENuclear factor interleukin-3-regulated OS=Mus musculus OX=10090 GN=Nfil3 PE=1 SV=1	INVnr_XP_001867106.1_conserved_hypothetical_protein_[Culex_quinquefasciatus]
CPIJ012670	nucleotide exchange factor SIL1 precursor	14.2055	1.94213	0.423861	4.582	4.61e-06	3.54e-05	cqu04141	nucleotide exchange factor SIL1	SIL1_DROMENucleotide exchange factor SIL1 OS=Drosophila melanogaster OX=7227 GN=CG10420 PE=2 SV=1	INVnr_XP_001862933.1_nucleotide_exchange_factor_SIL1_[Culex_quinquefasciatus]
CPIJ008529	lactase-phlorizin hydrolase precursor	743.568	1.93828	0.128527	15.0807	2.17e-51	9.61e-49	cqu00052,cqu01100	lactase-phlorizin hydrolase	LPH_HUMANLactase-phlorizin hydrolase OS=Homo sapiens OX=9606 GN=LCT PE=1 SV=3	INVnr_XP_001850318.1_lactase-phlorizin_hydrolase_[Culex_quinquefasciatus]
CPIJ007212	conserved hypothetical protein	22.4132	1.93167	0.354261	5.45268	4.96e-08	5.81e-07		conserved hypothetical protein	YELL_DROGU yellow OS=Drosophila guanche OX=7266 GN=y PE=3 SV=1	INVnr_XP_001848554.1_conserved_hypothetical_protein_[Culex_quinquefasciatus]
CPIJ019794	prov protein, putative	61.4482	1.92283	0.242069	7.94333	1.97e-15	7.3e-14	cqu04141	Tetratricopeptide repeat	DNJC3_CHICK homolog subfamily C member 3 OS=Gallus gallus OX=9031 GN=DNAJC3 PE=2 SV=1	INVnr_XP_001870072.1_prov_protein_[Culex_quinquefasciatus]
CPIJ000536	secreted protein	8.34049	1.91963	0.50294	3.81681	0.000135189	0.000717072		secreted protein	---NA---	INVnr_XP_001842206.1_secreted_protein_[Culex_quinquefasciatus]
CPIJ007721	hypothetical protein	3302.62	1.91693	0.127572	15.0263	4.94e-51	2.05e-48		hypothetical protein CpipJ_CPIJ007721	---NA---	INVnr_XP_001850182.1_hypothetical_protein_CpipJ_CPIJ007721_[Culex_quinquefasciatus]
CPIJ007178	conserved hypothetical protein	39.0482	1.91677	0.294144	6.51644	7.2e-11	1.4e-09		conserved hypothetical protein	---NA---	INVnr_XP_001848733.1_conserved_hypothetical_protein_[Culex_quinquefasciatus]
CPIJ012368	lipoprotein-releasing system ATP-binding protein lolD	7.97181	1.91472	0.500319	3.82699	0.000129719	0.000691701		abc transporter	ABCG1_MOUSEATP-binding cassette sub-family G member 1 OS=Mus musculus OX=10090 GN=Abcg1 PE=1 SV=1	INVnr_XP_001863370.1_lipoprotein-releasing_system_ATP-binding_protein_lolD_[Culex_quinquefasciatus]
CPIJ005585	conserved hypothetical protein	17.9846	1.90937	0.399231	4.78261	1.73e-06	1.46e-05		conserved hypothetical protein	---NA---	INVnr_XP_001847825.1_conserved_hypothetical_protein_[Culex_quinquefasciatus]
CPIJ002809	conserved hypothetical protein	46.9099	1.905	0.313876	6.06929	1.28e-09	2.07e-08		BAG domain-containing Samui	BAGS_BOMMOBAG domain-containing Samui OS=Bombyx mori OX=7091 GN=Samui PE=2 SV=1	INVnr_XP_001844965.1_conserved_hypothetical_protein_[Culex_quinquefasciatus]
CPIJ009023	conserved hypothetical protein	6.5192	1.902	0.53533	3.55294	0.000380946	0.00177825		conserved hypothetical protein	---NA---	INVnr_XP_001850691.1_conserved_hypothetical_protein_[Culex_quinquefasciatus]
CPIJ004401	ornithine aminotransferase, mitochondrial precursor	167.439	1.89772	0.241889	7.84544	4.31e-15	1.53e-13	cqu00330,cqu01100	ornithine mitochondrial	OAT_DROMEOrnithine mitochondrial OS=Drosophila melanogaster OX=7227 GN=Oat PE=2 SV=1	INVnr_XP_001845987.1_ornithine_aminotransferase,_mitochondrial_[Culex_quinquefasciatus]
CPIJ004023	NADH:ubiquinone dehydrogenase, putative	281.444	1.88323	0.155015	12.1487	5.83e-34	1.01e-31	cqu00190,cqu01100	NADH:ubiquinone dehydrogenase	NDUA4_MOUSECytochrome c oxidase subunit NDUFA4 OS=Mus musculus OX=10090 GN=Ndufa4 PE=1 SV=2	INVnr_XP_001845609.1_NADH:ubiquinone_dehydrogenase_[Culex_quinquefasciatus]
CPIJ012653	septin	5.37058	1.88082	0.568356	3.30922	0.000935549	0.00386965	cqu04215	septin-4	SEPT4_MOUSESeptin-4 OS=Mus musculus OX=10090 GN=Sept4 PE=1 SV=1	INVnr_XP_001862952.1_septin_[Culex_quinquefasciatus]
CPIJ011457	conserved hypothetical protein	164.018	1.87893	0.381632	4.92341	8.51e-07	7.71e-06		transmembrane 205	TM205_XENLATransmembrane 205 OS=Xenopus laevis OX=8355 GN=tmem205 PE=2 SV=1	INVnr_XP_001861702.1_conserved_hypothetical_protein_[Culex_quinquefasciatus]
CPIJ013046	keratinocyte lectin, putative	14.3065	1.87442	0.425465	4.40559	1.05e-05	7.52e-05		keratinocyte lectin	---NA---	INVnr_XP_001863476.1_keratinocyte_lectin_[Culex_quinquefasciatus]
CPIJ003256	conserved hypothetical protein	16.3779	1.87366	0.402191	4.65863	3.18e-06	2.53e-05		oxidative stress-induced growth inhibitor 2 isoform X2	OSGI2_HUMANOxidative stress-induced growth inhibitor 2 OS=Homo sapiens OX=9606 GN=OSGIN2 PE=2 SV=1	INVnr_XP_001844627.1_conserved_hypothetical_protein_[Culex_quinquefasciatus]
CPIJ007997	sodium-dependent serotonin transporter	22.0826	1.86701	0.374148	4.99004	6.04e-07	5.64e-06		sodium-dependent serotonin transporter	SC6A4_DROMESodium-dependent serotonin transporter OS=Drosophila melanogaster OX=7227 GN= PE=2 SV=1	INVnr_XP_001849951.1_sodium-dependent_serotonin_transporter_[Culex_quinquefasciatus]
CPIJ012888	rRNA processing protein Ebp2	25.4566	1.85981	0.343165	5.41958	5.97e-08	6.85e-07		rRNA processing Ebp2	EBP2_DROMEProbable rRNA-processing EBP2 homolog OS=Drosophila melanogaster OX=7227 GN=CG1542 PE=2 SV=1	INVnr_XP_001863228.1_rRNA_processing_protein_Ebp2_[Culex_quinquefasciatus]
CPIJ014512	conserved hypothetical protein	6.34399	1.85233	0.531596	3.48447	0.000493112	0.00222374		transient receptor potential cation channel trpm-like isoform X2	TRPCG_DROMETransient receptor potential cation channel trpm OS=Drosophila melanogaster OX=7227 GN=Trpm PE=1 SV=1	INVnr_XP_001864921.1_conserved_hypothetical_protein_[Culex_quinquefasciatus]
CPIJ004321	gram-negative bacteria binding protein	5265.88	1.84931	0.107684	17.1735	4.19e-66	2.95e-63		gram-negative bacteria binding	BGBP_PENMOBeta-1,3-glucan-binding OS=Penaeus monodon OX=6687 PE=2 SV=1	INVnr_XP_001845963.1_gram-negative_bacteria_binding_protein_[Culex_quinquefasciatus]
CPIJ017145	conserved hypothetical protein	9.10804	1.84837	0.484335	3.8163	0.000135467	0.000718005		nascent polypeptide-associated complex subunit muscle-specific form isoform X1	---NA---	INVnr_XP_001867402.1_conserved_hypothetical_protein_[Culex_quinquefasciatus]
CPIJ016639	acetyl-coa synthetase	384.642	1.84612	0.395033	4.67333	2.96e-06	2.38e-05	cqu00010,cqu00620,cqu00640,cqu01100,cqu01200	acetyl- synthetase	ACSA_DROMEAcetyl-coenzyme A synthetase OS=Drosophila melanogaster OX=7227 GN= oAS PE=2 SV=1	INVnr_XP_001866807.1_acetyl-CoA_synthetase_[Culex_quinquefasciatus]
CPIJ008018	dual specificity protein phosphatase	20.0824	1.84317	0.384277	4.79647	1.61e-06	1.38e-05	cqu04013,cqu04214	dual specificity phosphatase	DUS10_BOVINDual specificity phosphatase 10 OS=Bos taurus OX=9913 GN=DUSP10 PE=2 SV=1	INVnr_XP_001850047.1_dual_specificity_protein_phosphatase_[Culex_quinquefasciatus]
CPIJ002741	conserved hypothetical protein	186.858	1.84022	0.18971	9.70019	3.01e-22	2.41e-20		conserved hypothetical protein	---NA---	INVnr_XP_001844324.1_conserved_hypothetical_protein_[Culex_quinquefasciatus]
CPIJ012207	ammonium transporter 1	16.6112	1.8336	0.393839	4.65571	3.23e-06	2.56e-05		ammonium transporter 1	RHBG_TAKRUAmmonium transporter Rh type B OS=Takifugu rubripes OX=31033 GN=rhbg PE=1 SV=1	INVnr_XP_001862160.1_ammonium_transporter_1_[Culex_quinquefasciatus]
CPIJ003801	NADP-dependent leukotriene B4 12-hydroxydehydrogenase	121.668	1.82625	0.260441	7.01214	2.35e-12	5.8e-11		NADP-dependent leukotriene B4 12-hydroxydehydrogenase	PTGR1_CAVPOProstaglandin reductase 1 OS=Cavia porcellus OX=10141 GN=Ptgr1 PE=1 SV=1	INVnr_XP_001845374.1_NADP-dependent_leukotriene_B4_12-hydroxydehydrogenase_[Culex_quinquefasciatus]
CPIJ008595	ran	106.368	1.82489	0.219112	8.3286	8.18e-17	3.67e-15	cqu03008,cqu03013	GTP-binding nuclear Ran	RAN_DROMEGTP-binding nuclear Ran OS=Drosophila melanogaster OX=7227 GN=Ran PE=1 SV=1	INVnr_XP_019538297.1_PREDICTED:_GTP-binding_nuclear_protein_Ran_[Aedes_albopictus]
CPIJ012503	gamma-glutamylcysteine synthetase, putative	87.0414	1.82268	0.464203	3.92647	8.62e-05	0.000482288	cqu00270,cqu00480,cqu01100	glutamate--cysteine ligase regulatory subunit	GSH0_RATGlutamate--cysteine ligase regulatory subunit OS=Rattus norvegicus OX=10116 GN=Gclm PE=1 SV=1	INVnr_XP_001862478.1_gamma-glutamylcysteine_synthetase_[Culex_quinquefasciatus]
CPIJ003751	conserved hypothetical protein	14.2009	1.81626	0.431749	4.20674	2.59e-05	0.000166509		conserved hypothetical protein	TM201_DANRETransmembrane 201 OS=Danio rerio OX=7955 GN=tmem201 PE=2 SV=1	INVnr_XP_001845324.1_conserved_hypothetical_protein_[Culex_quinquefasciatus]
CPIJ002181	endoplasmic reticulum-Golgi intermediate compartment protein 3	7.38604	1.80913	0.51048	3.54399	0.000394126	0.00182766		endoplasmic reticulum-Golgi intermediate compartment 3	ERGI3_XENLAEndoplasmic reticulum-Golgi intermediate compartment 3 OS=Xenopus laevis OX=8355 GN=ergic3 PE=2 SV=1	INVnr_XP_001843851.1_endoplasmic_reticulum-Golgi_intermediate_compartment_protein_3_[Culex_quinquefasciatus]
CPIJ011082	heat shock protein 70 B2	113.208	1.80259	0.642706	2.80469	0.00503646	0.0163187	cqu03040,cqu04141,cqu04144,cqu04213	heat shock 70 B2	HSP74_ANOALHeat shock 70 B2 OS=Anopheles albimanus OX=7167 GN=HSP70B2 PE=3 SV=1	INVnr_XP_001861437.1_heat_shock_protein_70_B2_[Culex_quinquefasciatus]
CPIJ007435	conserved hypothetical protein	99.9281	1.79965	0.206051	8.73402	2.46e-18	1.28e-16		sodium phosphate cotransporter	VGLU1_XENLAVesicular glutamate transporter 1 OS=Xenopus laevis OX=8355 GN=slc17a7 PE=2 SV=1	INVnr_XP_001849060.1_conserved_hypothetical_protein_[Culex_quinquefasciatus]
CPIJ017566	synaptic vesicle protein	29.7216	1.79896	0.342154	5.25775	1.46e-07	1.54e-06		synaptic vesicle	SV2B_MOUSESynaptic vesicle glyco 2B OS=Mus musculus OX=10090 GN=Sv2b PE=1 SV=1	INVnr_XP_001867964.1_synaptic_vesicle_protein_[Culex_quinquefasciatus]
CPIJ014054	glutathione S-transferase theta-1	8.97841	1.79864	0.48862	3.68105	0.000232273	0.00114897	cqu00480,cqu00980,cqu00982	glutathione S-transferase theta-1	GSTT3_MOUSEGlutathione S-transferase theta-3 OS=Mus musculus OX=10090 GN=Gstt3 PE=1 SV=1	INVnr_XP_001864152.1_glutathione_S-transferase_theta-1_[Culex_quinquefasciatus]
CPIJ008379	conserved hypothetical protein	318.944	1.79695	0.182394	9.85204	6.72e-23	5.57e-21		conserved hypothetical protein	---NA---	INVnr_XP_001849875.1_conserved_hypothetical_protein_[Culex_quinquefasciatus]
CPIJ003007	elongase, putative	35.2393	1.79452	0.321118	5.58833	2.29e-08	2.92e-07	cqu00062,cqu01040,cqu01212	elongation of very long chain fatty acids 6-like	ELOV6_CHICKElongation of very long chain fatty acids 6 OS=Gallus gallus OX=9031 GN=ELOVL6 PE=2 SV=1	INVnr_XP_001844899.1_elongase_[Culex_quinquefasciatus]
CPIJ016771	peptidoglycan recognition protein precursor	2290.9	1.79395	0.137433	13.0533	6.09e-39	1.34e-36		peptidoglycan recognition	PGSC2_DROSIPeptidoglycan-recognition SC2 OS=Drosophila simulans OX=7240 GN=PGRP-SC2 PE=3 SV=1	INVnr_XP_001867002.1_peptidoglycan_recognition_protein_[Culex_quinquefasciatus]
CPIJ007376	calreticulin	1155.67	1.78925	0.14055	12.7304	4.01e-37	8.31e-35	cqu04141,cqu04145	calreticulin	CALR_DROMECalreticulin OS=Drosophila melanogaster OX=7227 GN=Calr PE=1 SV=2	INVnr_XP_001848824.1_calreticulin_[Culex_quinquefasciatus]
CPIJ008588	mRNA turnover protein 4	43.5804	1.78625	0.272814	6.54751	5.85e-11	1.15e-09		mRNA turnover 4	MRT4_MOUS turnover 4 homolog OS=Mus musculus OX=10090 GN=Mrto4 PE=1 SV=1	INVnr_XP_001850330.1_mRNA_turnover_protein_4_[Culex_quinquefasciatus]
CPIJ014897	disulfide oxidoreductase	116.038	1.7806	0.222509	8.00237	1.22e-15	4.67e-14		disulfide oxidoreductase	AIFM3_HUMANApoptosis-inducing factor 3 OS=Homo sapiens OX=9606 GN=AIFM3 PE=1 SV=1	INVnr_XP_001864945.1_disulfide_oxidoreductase_[Culex_quinquefasciatus]
CPIJ005483	conserved hypothetical protein	29.2847	1.77305	0.321333	5.51782	3.43e-08	4.23e-07		cysteine-rich with EGF-like domain 2 isoform X2	CREL2_DANRECysteine-rich with EGF-like domain 2 OS=Danio rerio OX=7955 GN=creld2 PE=2 SV=2	INVnr_XP_001846960.1_conserved_hypothetical_protein_[Culex_quinquefasciatus]
CPIJ007956	conserved hypothetical protein	72.4947	1.7689	0.273824	6.45998	1.05e-10	1.97e-09		conserved hypothetical protein	---NA---	INVnr_XP_001849910.1_conserved_hypothetical_protein_[Culex_quinquefasciatus]
CPIJ007102	conserved hypothetical protein	7.89688	1.76133	0.496721	3.54592	0.000391248	0.00181791		UPF0746 DDB_G0281095 isoform X1	---NA---	INVnr_XP_001849081.1_conserved_hypothetical_protein_[Culex_quinquefasciatus]
CPIJ012022	organic cation/carnitine transporter 1	38.9493	1.7583	0.312568	5.62533	1.85e-08	2.42e-07		organic cation carnitine transporter 1	CART_DROMECarcinine transporter OS=Drosophila melanogaster OX=7227 GN= PE=2 SV=1	INVnr_XP_001862289.1_organic_cation/carnitine_transporter_1_[Culex_quinquefasciatus]
CPIJ008191	protein grpE	69.5316	1.75368	0.25539	6.86668	6.57e-12	1.47e-10		grpE mitochondrial	GRPE_DROME mitochondrial OS=Drosophila melanogaster OX=7227 GN=Roe1 PE=2 SV=2	INVnr_XP_001849441.1_grpE_[Culex_quinquefasciatus]
CPIJ002168	conserved hypothetical protein	7607.81	1.75156	0.133983	13.073	4.7e-39	1.07e-36		conserved hypothetical protein	---NA---	INVnr_XP_001843436.1_conserved_hypothetical_protein_[Culex_quinquefasciatus]
CPIJ016336	esterase B1 precursor	306.458	1.7472	0.154686	11.2951	1.39e-29	1.82e-27		esterase B1	EST6_APIMEVenom carboxylesterase-6 OS=Apis mellifera OX=7460 PE=2 SV=1	INVnr_XP_001866701.1_esterase_B1_[Culex_quinquefasciatus]
CPIJ007556	regulator of ribosome biosynthesis	41.7466	1.74575	0.293367	5.95072	2.67e-09	4.04e-08		ribosome biogenesis regulatory homolog	RRS1_HUMANRibosome biogenesis regulatory homolog OS=Homo sapiens OX=9606 GN=RRS1 PE=1 SV=2	INVnr_XP_001849672.1_regulator_of_ribosome_biosynthesis_[Culex_quinquefasciatus]
CPIJ002384	endoplasmin precursor	1097.88	1.74508	0.122837	14.2065	8.35e-46	2.8e-43	cqu04141	endoplasmin	ENPL_BOVINEndoplasmin OS=Bos taurus OX=9913 GN=HSP90B1 PE=2 SV=1	INVnr_XP_001844128.1_endoplasmin_[Culex_quinquefasciatus]
CPIJ002176	phosphatidylserine synthase	67.8292	1.7433	0.236544	7.3699	1.71e-13	4.89e-12	cqu00564,cqu01100	phosphatidylserine synthase	PTSS1_CHICKPhosphatidylserine synthase 1 OS=Gallus gallus OX=9031 GN=PTDSS1 PE=2 SV=2	INVnr_XP_001843845.1_phosphatidylserine_synthase_[Culex_quinquefasciatus]
CPIJ003525	vitellogenin-1 precursor	5.1508	1.74041	0.554733	3.13738	0.00170465	0.00649056		lipase member H isoform X3	LIPH_RABITLipase member H OS=Oryctolagus cuniculus OX=9986 GN=LIPH PE=2 SV=1	INVnr_XP_001845165.1_vitellogenin-1_[Culex_quinquefasciatus]
CPIJ001505	conserved hypothetical protein	29.2835	1.74037	0.31584	5.5103	3.58e-08	4.36e-07		conserved hypothetical protein	MLEC_DANREMalectin OS=Danio rerio OX=7955 GN=mlec PE=3 SV=1	INVnr_XP_001843806.1_conserved_hypothetical_protein_[Culex_quinquefasciatus]
CPIJ011687	inosine-5-monophosphate dehydrogenase	42.8822	1.73757	0.287432	6.04515	1.49e-09	2.38e-08	cqu00230,cqu00983,cqu01100	inosine-5 -monophosphate dehydrogenase-like	IMDH_DROMEInosine-5 -monophosphate dehydrogenase OS=Drosophila melanogaster OX=7227 GN=ras PE=1 SV=1	INVnr_XP_001861658.1_inosine-5-monophosphate_dehydrogenase_[Culex_quinquefasciatus]
CPIJ012699	conserved hypothetical protein	26.259	1.73051	0.336872	5.13699	2.79e-07	2.8e-06		conserved hypothetical protein	MTNK_GEOKAMethylthioribose kinase OS=Geobacillus kaustophilus (strain HTA426) OX=235909 GN=mtnK PE=3 SV=1	INVnr_XP_001863905.1_conserved_hypothetical_protein_[Culex_quinquefasciatus]
CPIJ008106	conserved hypothetical protein	19.6805	1.72552	0.390112	4.42313	9.73e-06	6.96e-05		conserved hypothetical protein	NRF6_CAEELNose resistant to fluoxetine 6 OS=Caenorhabditis elegans OX=6239 GN=nrf-6 PE=1 SV=3	INVnr_XP_001849838.1_conserved_hypothetical_protein_[Culex_quinquefasciatus]
CPIJ014557	nitrilase and fragile histidine triad fusion protein NitFhit	13.223	1.72451	0.444663	3.87825	0.00010521	0.000575837	cqu00250	nitrilase and fragile histidine triad fusion hit	NIT2_HUMANOmega-amidase NIT2 OS=Homo sapiens OX=9606 GN=NIT2 PE=1 SV=1	INVnr_XP_001864903.1_nitrilase_and_fragile_histidine_triad_fusion_protein_NitFhit_[Culex_quinquefasciatus]
CPIJ006963	conserved hypothetical protein	5.20896	1.71685	0.561117	3.05971	0.00221551	0.00815364		circadian clock-controlled isoform X2	CCCP_DROMECircadian clock-controlled OS=Drosophila melanogaster OX=7227 GN=anon- PE=2 SV=2	INVnr_XP_001849010.1_conserved_hypothetical_protein_[Culex_quinquefasciatus]
CPIJ006266	conserved hypothetical protein	10.8636	1.71378	0.446375	3.83933	0.000123369	0.000663874		conserved hypothetical protein	SCRN1_MOUSESecernin-1 OS=Mus musculus OX=10090 GN=Scrn1 PE=1 SV=1	INVnr_XP_001847667.1_conserved_hypothetical_protein_[Culex_quinquefasciatus]
CPIJ011127	CYP4H34: cytochrome P450 4H34	210.544	1.71116	0.399706	4.28106	1.86e-05	0.000123957		cytochrome P450	CP4D2_DROMECytochrome P450 4d2 OS=Drosophila melanogaster OX=7227 GN=Cyp4d2 PE=2 SV=2	INVnr_XP_001861370.1_cytochrome_P450_4d1_[Culex_quinquefasciatus]
CPIJ010244	conserved hypothetical protein	51.0422	1.70822	0.271534	6.29101	3.15e-10	5.47e-09		sodium hydrogen exchanger 9B2 isoform X2	SL9B2_HUMANSodium hydrogen exchanger 9B2 OS=Homo sapiens OX=9606 GN=SLC9B2 PE=1 SV=2	INVnr_XP_001852926.1_conserved_hypothetical_protein_[Culex_quinquefasciatus]
CPIJ018239	conserved hypothetical protein	10.9825	1.7029	0.635114	2.68125	0.00733477	0.0225125		conserved hypothetical protein	---NA---	INVnr_XP_001868393.1_conserved_hypothetical_protein_[Culex_quinquefasciatus]
CPIJ005552	thioredoxin reductase 1, mitochondrial precursor	529.358	1.69368	0.425297	3.98234	6.82e-05	0.000393685	cqu00450	thioredoxin reductase mitochondrial	TRXR1_DROMEThioredoxin reductase mitochondrial OS=Drosophila melanogaster OX=7227 GN=Trxr-1 PE=1 SV=2	INVnr_XP_001847793.1_thioredoxin_reductase_1,_mitochondrial_[Culex_quinquefasciatus]
CPIJ015908	cabut	75.2239	1.69121	0.276682	6.11246	9.81e-10	1.61e-08		Krueppel-like factor 10	KLF10_HUMANKrueppel-like factor 10 OS=Homo sapiens OX=9606 GN=KLF10 PE=1 SV=1	INVnr_XP_001866174.1_cabut_[Culex_quinquefasciatus]
CPIJ009025	hypothetical protein	284.573	1.68547	0.176402	9.55469	1.24e-21	8.82e-20	cqu03060,cqu04141,cqu04145	transport Sec61 subunit beta-like	SC61B_PONAB transport Sec61 subunit beta OS=Pongo abelii OX=9601 GN=SEC61B PE=3 SV=3	INVnr_XP_019873967.1_PREDICTED:_LOW_QUALITY_PROTEIN:_protein_transport_protein_Sec61_subunit_beta-like_[Aethina_tumida]
CPIJ004141	1-acyl-sn-glycerol-3-phosphate acyltransferase beta	33.193	1.6839	0.317181	5.30895	1.1e-07	1.19e-06		1-acyl-sn-glycerol-3-phosphate acyltransferase beta	PLCA_HUMAN1-acyl-sn-glycerol-3-phosphate acyltransferase alpha OS=Homo sapiens OX=9606 GN=AGPAT1 PE=1 SV=2	INVnr_XP_001845865.1_1-acyl-sn-glycerol-3-phosphate_acyltransferase_beta_[Culex_quinquefasciatus]
CPIJ011366	mitochondrial ribosomal protein S31	45.386	1.68162	0.281438	5.97509	2.3e-09	3.51e-08		mitochondrial ribosomal S31	RT31_HUMAN28S ribosomal mitochondrial OS=Homo sapiens OX=9606 GN=MRPS31 PE=1 SV=3	INVnr_XP_001861604.1_mitochondrial_ribosomal_protein_S31_[Culex_quinquefasciatus]
CPIJ007514	ATPase family AAA domain-containing protein 3	50.9974	1.68106	0.275827	6.09461	1.1e-09	1.79e-08		ATPase family AAA domain-containing 3	ATD3A_DROMEATPase family AAA domain-containing 3A homolog OS=Drosophila melanogaster OX=7227 GN=bor PE=1 SV=2	INVnr_XP_001849328.1_ATPase_family_AAA_domain-containing_protein_3_[Culex_quinquefasciatus]
CPIJ008856	conserved hypothetical protein	97.5627	1.6709	0.426767	3.91524	9.03e-05	0.000503294		abhydrolase domain-containing 2	ABHD2_DROMEAbhydrolase domain-containing 2 OS=Drosophila melanogaster OX=7227 GN=Hydr2 PE=2 SV=2	INVnr_XP_001850774.1_conserved_hypothetical_protein_[Culex_quinquefasciatus]
CPIJ012780	conserved hypothetical protein	8.96826	1.66883	0.482561	3.45827	0.000543651	0.0024176		solute carrier family 12 member 4-like isoform X7	---NA---	INVnr_XP_001862999.1_conserved_hypothetical_protein_[Culex_quinquefasciatus]
CPIJ008800	ATP-dependent protease La	82.6043	1.66174	0.447043	3.71718	0.000201461	0.00101341		ATP-dependent protease La	LONM_DROMELon protease mitochondrial OS=Drosophila melanogaster OX=7227 GN=Lon PE=1 SV=1	INVnr_XP_001850455.1_ATP-dependent_protease_La_[Culex_quinquefasciatus]
CPIJ002941	high choriolytic enzyme 1 precursor	468.132	1.66066	0.132926	12.4931	8.14e-36	1.59e-33		high choriolytic enzyme 1	SEMP1_DROMESeminal metalloprotease 1 OS=Drosophila melanogaster OX=7227 GN=Semp1 PE=1 SV=1	INVnr_XP_001844559.1_high_choriolytic_enzyme_1_[Culex_quinquefasciatus]
CPIJ019868	heat shock 70 kDa protein 4	114.375	1.65856	0.241235	6.87528	6.19e-12	1.4e-10	cqu04141	heat shock 70 kDa 4	HSP74_HUMANHeat shock 70 kDa 4 OS=Homo sapiens OX=9606 GN=HSPA4 PE=1 SV=4	INVnr_XP_001870146.1_heat_shock_70_kDa_protein_4_[Culex_quinquefasciatus]
CPIJ004815	uricase	9.78302	1.65708	0.467908	3.54146	0.000397923	0.00184186	cqu00230,cqu01100	2-oxo-4-hydroxy-4-carboxy-5-ureidoimidazoline decarboxylase-like	URAD_AMICA2-oxo-4-hydroxy-4-carboxy-5-ureidoimidazoline decarboxylase OS=Amia calva OX=7924 GN=urad PE=3 SV=1	INVnr_XP_001846425.1_uricase_[Culex_quinquefasciatus]
CPIJ008702	conserved hypothetical protein	25.513	1.65695	0.34656	4.78113	1.74e-06	1.47e-05		GILT 1 isoform X1	GILT1_DROMEGILT 1 OS=Drosophila melanogaster OX=7227 GN=GILT1 PE=2 SV=1	INVnr_XP_001850270.1_conserved_hypothetical_protein_[Culex_quinquefasciatus]
CPIJ008164	conserved hypothetical protein	69.6965	1.65515	0.262653	6.30166	2.94e-10	5.15e-09		probable G- coupled receptor Mth-like 14	MTH14_DROMEProbable G- coupled receptor Mth-like 14 OS=Drosophila melanogaster OX=7227 GN=mthl14 PE=2 SV=1	INVnr_XP_001849799.1_conserved_hypothetical_protein_[Culex_quinquefasciatus]
CPIJ002958	sterol o-acyltransferase	42.8663	1.65081	0.29467	5.60224	2.12e-08	2.71e-07		sterol o-acyltransferase	SOAT1_HUMANSterol O-acyltransferase 1 OS=Homo sapiens OX=9606 GN=SOAT1 PE=1 SV=3	INVnr_XP_001844576.1_sterol_o-acyltransferase_[Culex_quinquefasciatus]
CPIJ011877	pyridoxamine-phosphate oxidase	73.0044	1.65058	0.220829	7.47449	7.75e-14	2.33e-12	cqu00750,cqu01100	pyridoxamine-phosphate oxidase	PNPO_BOVINPyridoxine-5 -phosphate oxidase OS=Bos taurus OX=9913 GN=PNPO PE=2 SV=1	INVnr_XP_001863268.1_pyridoxamine-phosphate_oxidase_[Culex_quinquefasciatus]
CPIJ007098	ubiquitin-fold modifier 1 precursor	68.8183	1.64002	0.234891	6.98202	2.91e-12	7.02e-11		ubiquitin-fold modifier 1	UFM1_CULQUUbiquitin-fold modifier 1 OS=Culex quinquefasciatus OX=7176 GN=CPIJ007098 PE=3 SV=1	INVnr_XP_001849077.1_ubiquitin-fold_modifier_1_[Culex_quinquefasciatus]
CPIJ004227	lipase	2289.82	1.6365	0.112821	14.5053	1.12e-47	3.95e-45		phospholipase A1-like isoform X1	LIPH_RABITLipase member H OS=Oryctolagus cuniculus OX=9986 GN=LIPH PE=2 SV=1	INVnr_XP_001845807.1_lipase_[Culex_quinquefasciatus]
CPIJ012737	nucleoporin 50kDa	20.2064	1.63648	0.377885	4.33062	1.49e-05	0.000102684	cqu03013	nucleoporin 50kDa	NUP50_DROMENuclear pore complex Nup50 OS=Drosophila melanogaster OX=7227 GN=Nup50 PE=2 SV=1	INVnr_XP_001863028.1_nucleoporin_50kDa_[Culex_quinquefasciatus]
CPIJ012226	augmenter of liver regeneration	14.8527	1.63638	0.401599	4.07466	4.61e-05	0.00027962		augmenter of liver regeneration	ALR_MOUSEFAD-linked sulfhydryl oxidase ALR OS=Mus musculus OX=10090 GN=Gfer PE=1 SV=2	INVnr_XP_001862367.1_augmenter_of_liver_regeneration_[Culex_quinquefasciatus]
CPIJ005656	oxidoreductase	25.5399	1.63416	0.347879	4.69749	2.63e-06	2.14e-05		farnesol dehydrogenase-like	SDR1_AEDAEFarnesol dehydrogenase OS=Aedes aegypti OX=7159 GN=SDR-1 PE=1 SV=2	INVnr_XP_001847205.1_oxidoreductase_[Culex_quinquefasciatus]
CPIJ008582	hypothetical protein	88.4229	1.63362	0.217675	7.50485	6.15e-14	1.88e-12		single-pass membrane and coiled-coil domain-containing 4 homolog	SMCO4_CULQUSingle-pass membrane and coiled-coil domain-containing 4 homolog OS=Culex quinquefasciatus OX=7176 GN=CPIJ008582 PE=3 SV=1	INVnr_XP_001850178.1_hypothetical_protein_CpipJ_CPIJ008582_[Culex_quinquefasciatus]
CPIJ004899	eukaryotic translation initiation factor 3 subunit 1	165.399	1.63058	0.182312	8.94391	3.76e-19	2.13e-17	cqu03013	eukaryotic translation initiation factor 3 subunit 1	EIF3J_CULQUEukaryotic translation initiation factor 3 subunit J OS=Culex quinquefasciatus OX=7176 GN=CPIJ004899 PE=3 SV=1	INVnr_XP_001846579.1_eukaryotic_translation_initiation_factor_3_subunit_1_[Culex_quinquefasciatus]
CPIJ001699	dolichyl pyrophosphate Glc1Man9GlcNAc2 alpha-1,3-glucosyltransferase	9.22158	1.62974	0.467923	3.48293	0.000495961	0.0022323	cqu00510,cqu01100	dolichyl pyrophosphate Glc1Man9 c2 alpha-1,3-glucosyltransferase	ALG8_DROMEProbable dolichyl pyrophosphate Glc1Man9 c2 alpha-1,3-glucosyltransferase OS=Drosophila melanogaster OX=7227 GN=xit PE=2 SV=1	INVnr_XP_001843239.1_dolichyl_pyrophosphate_Glc1Man9GlcNAc2_alpha-1,3-glucosyltransferase_[Culex_quinquefasciatus]
CPIJ007074	protein l(2)37Cc	24.3382	1.62881	0.33663	4.83856	1.31e-06	1.13e-05		l(2)37Cc	L2CC_DROME l(2)37Cc OS=Drosophila melanogaster OX=7227 GN=l(2)37Cc PE=2 SV=2	INVnr_XP_001848603.1_l(2)37Cc_[Culex_quinquefasciatus]
CPIJ004228	lipase	1949.4	1.62606	0.0978634	16.6157	5.37e-62	3.15e-59		phospholipase A1-like isoform X1	LIPH_RABITLipase member H OS=Oryctolagus cuniculus OX=9986 GN=LIPH PE=2 SV=1	INVnr_XP_001845808.1_lipase_[Culex_quinquefasciatus]
CPIJ018833	H/ACA ribonucleoprotein complex subunit 3	43.9289	1.62548	0.270626	6.00637	1.9e-09	2.95e-08	cqu03008	H ACA ribonucleo complex subunit 3	NOP10_DROMEH ACA ribonucleo complex subunit 3 OS=Drosophila melanogaster OX=7227 GN=CG7637 PE=2 SV=1	INVnr_XP_001869107.1_H/ACA_ribonucleoprotein_complex_subunit_3_[Culex_quinquefasciatus]
CPIJ009725	conserved hypothetical protein	18.4489	1.62443	0.373001	4.35504	1.33e-05	9.26e-05		proline- glutamic acid- and leucine-rich 1-like	PELP1_XENLAProline- glutamic acid- and leucine-rich 1 OS=Xenopus laevis OX=8355 GN=pelp1 PE=1 SV=1	INVnr_XP_001851523.1_conserved_hypothetical_protein_[Culex_quinquefasciatus]
CPIJ002675	glutathione S-transferase 1	446.703	1.62141	0.178191	9.09926	9.1e-20	5.57e-18		glutathione S-transferase 1	GSTT1_MUSDOGlutathione S-transferase 1 OS=Musca domestica OX=7370 GN=Gst1 PE=2 SV=1	INVnr_XP_001844258.1_glutathione_S-transferase_1_[Culex_quinquefasciatus]
CPIJ018160	lipid storage droplets surface binding protein 2	520.293	1.61861	0.348841	4.63996	3.48e-06	2.74e-05		lipid storage droplets surface binding 2	LSD2_DROMELipid storage droplets surface-binding 2 OS=Drosophila melanogaster OX=7227 GN=Lsd-2 PE=1 SV=1	INVnr_XP_001868569.1_lipid_storage_droplets_surface_binding_protein_2_[Culex_quinquefasciatus]
CPIJ010176	conserved hypothetical protein	15.2133	1.61819	0.400892	4.03647	5.43e-05	0.000321462		O-acyltransferase like -like	NRF6_CAEELNose resistant to fluoxetine 6 OS=Caenorhabditis elegans OX=6239 GN=nrf-6 PE=1 SV=3	INVnr_XP_001870710.1_conserved_hypothetical_protein_[Culex_quinquefasciatus]
CPIJ011320	Ufm1-conjugating enzyme 1	39.4647	1.61756	0.287655	5.62325	1.87e-08	2.44e-07		Ufm1-conjugating enzyme 1	UFC1_CULQUUbiquitin-fold modifier-conjugating enzyme 1 OS=Culex quinquefasciatus OX=7176 GN=CPIJ011320 PE=3 SV=1	INVnr_XP_001861346.1_Ufm1-conjugating_enzyme_1_[Culex_quinquefasciatus]
CPIJ014499	conserved hypothetical protein	22.5844	1.61194	0.35004	4.60502	4.12e-06	3.2e-05	cqu00531,cqu01100,cqu04142	conserved hypothetical protein	IDUA_MOUSEAlpha-L-iduronidase OS=Mus musculus OX=10090 GN=Idua PE=1 SV=2	INVnr_XP_001864703.1_conserved_hypothetical_protein_[Culex_quinquefasciatus]
CPIJ000045	carboxylesterase	11.5833	1.60744	0.442084	3.63605	0.000276852	0.00134772		esterase B1	EST1_CULPIEsterase B1 OS=Culex pipiens OX=7175 GN=B1 PE=3 SV=1	INVnr_XP_001841715.1_carboxylesterase,_partial_[Culex_quinquefasciatus]
CPIJ002068	conserved hypothetical protein	35.6581	1.60505	0.292747	5.48271	4.19e-08	5e-07		UPF0553 C9orf64-like	QSPP_HUMANQueuosine salvage OS=Homo sapiens OX=9606 GN=C9orf64 PE=1 SV=1	INVnr_XP_001843336.1_conserved_hypothetical_protein,_partial_[Culex_quinquefasciatus]
CPIJ011962	multidrug resistance-associated protein 14	81.6111	1.60368	0.283301	5.6607	1.51e-08	2e-07	cqu02010	multidrug resistance-associated 14	MRP1_MOUSEMultidrug resistance-associated 1 OS=Mus musculus OX=10090 GN=Abcc1 PE=1 SV=1	INVnr_XP_001862061.1_multidrug_resistance-associated_protein_14_[Culex_quinquefasciatus]
CPIJ019675	conserved hypothetical protein	44.1321	1.59869	0.314248	5.08737	3.63e-07	3.54e-06		ABHD1-like	ABHD3_MOUSEPhospholipase ABHD3 OS=Mus musculus OX=10090 GN=Abhd3 PE=1 SV=1	INVnr_XP_001870235.1_conserved_hypothetical_protein_[Culex_quinquefasciatus]
CPIJ012113	brix domain-containing protein 2	6.30787	1.59785	0.537622	2.97207	0.00295797	0.010395		brix domain-containing 2	BRX1_DROMERibosome biogenesis BRX1 homolog OS=Drosophila melanogaster OX=7227 GN=CG11583 PE=2 SV=2	INVnr_XP_001862861.1_brix_domain-containing_protein_2_[Culex_quinquefasciatus]
CPIJ009789	conserved hypothetical protein	9.61318	1.59586	0.462103	3.45348	0.000553409	0.00245634		tetratricopeptide repeat 39B	TT39B_XENLATetratricopeptide repeat 39B OS=Xenopus laevis OX=8355 GN=ttc39b PE=2 SV=1	INVnr_XP_001851337.1_conserved_hypothetical_protein_[Culex_quinquefasciatus]
CPIJ007693	conserved hypothetical protein	267.497	1.59487	0.180012	8.85977	8.02e-19	4.43e-17		ER with RDEL retention signal	SEELE_DROME seele OS=Drosophila melanogaster OX=7227 GN=sel PE=1 SV=1	INVnr_XP_001849587.1_conserved_hypothetical_protein_[Culex_quinquefasciatus]
CPIJ014772	techylectin-5B precursor	22.1404	1.59349	0.354474	4.49535	6.95e-06	5.12e-05		microfibril-associated glyco 4-like	FBCD1_HUMANFibrinogen C domain-containing 1 OS=Homo sapiens OX=9606 GN=FIBCD1 PE=1 SV=2	INVnr_XP_001865150.1_techylectin-5B_[Culex_quinquefasciatus]
CPIJ007384	azurocidin precursor	876.955	1.59038	0.156596	10.156	3.12e-24	2.89e-22		serine-type enodpeptidase	CTR1_ANOGAChymotrypsin-1 OS=Anopheles gambiae OX=7165 GN=CHYM1 PE=1 SV=3	INVnr_XP_001848832.1_azurocidin_[Culex_quinquefasciatus]
CPIJ007481	SET and MYND domain-containing protein 5	22.5496	1.59032	0.358228	4.43941	9.02e-06	6.51e-05		SET and MYND domain-containing 5	SMYD5_XENLASET and MYND domain-containing 5 OS=Xenopus laevis OX=8355 GN=smyd5 PE=2 SV=1	INVnr_XP_001848651.1_SET_and_MYND_domain-containing_protein_5_[Culex_quinquefasciatus]
CPIJ011728	serine/threonine protein kinase	11.9044	1.58686	0.440371	3.60347	0.000314001	0.00150056	cqu04150	serine threonine kinase	STRAA_CHICKSTE20-related kinase adapter alpha OS=Gallus gallus OX=9031 GN=STRADA PE=2 SV=1	INVnr_XP_001862085.1_serine/threonine_protein_kinase_[Culex_quinquefasciatus]
CPIJ010805	carboxypeptidase A1 precursor	1044.95	1.58672	0.158819	9.99078	1.67e-23	1.44e-21		carboxypeptidase A1	CBPA1_PIGCarboxypeptidase A1 OS=Sus scrofa OX=9823 GN=CPA1 PE=1 SV=2	INVnr_XP_001856184.1_carboxypeptidase_A1_[Culex_quinquefasciatus]
CPIJ008799	ATP-dependent Lon protease, putative	39.2317	1.58618	0.301493	5.26107	1.43e-07	1.52e-06		ATP-dependent Lon protease	LONM_DROMELon protease mitochondrial OS=Drosophila melanogaster OX=7227 GN=Lon PE=1 SV=1	INVnr_XP_001850454.1_ATP-dependent_Lon_protease_[Culex_quinquefasciatus]
CPIJ014363	Rrp15 protein	27.0857	1.57832	0.326877	4.82849	1.38e-06	1.19e-05		RRP15 isoform X2	RRP15_DROPSRRP15 OS=Drosophila pseudoobscura pseudoobscura OX=46245 GN=GA17706 PE=3 SV=1	INVnr_XP_001864631.1_Rrp15_protein_[Culex_quinquefasciatus]
CPIJ019179	ninjurin a	19.4088	1.57226	0.371774	4.22907	2.35e-05	0.000152628		ninjurin a	---NA---	INVnr_XP_001869446.1_ninjurin_a_[Culex_quinquefasciatus]
CPIJ018452	conserved hypothetical protein	224.678	1.56949	0.18359	8.54889	1.24e-17	5.88e-16		coiled-coil-helix-coiled-coil-helix domain-containing mitochondrial	CHCH2_MOUSECoiled-coil-helix-coiled-coil-helix domain-containing 2 OS=Mus musculus OX=10090 GN=Chchd2 PE=2 SV=1	INVnr_XP_001868606.1_conserved_hypothetical_protein_[Culex_quinquefasciatus]
CPIJ015151	adenylate cyclase, putative	66.2097	1.56438	0.241615	6.4747	9.5e-11	1.8e-09		adenylate cyclase	PCFT_XENLAProton-coupled folate transporter OS=Xenopus laevis OX=8355 GN=slc46a1 PE=2 SV=1	INVnr_XP_001865419.1_adenylate_cyclase_[Culex_quinquefasciatus]
CPIJ017218	lupus la ribonucleoprotein, putative	121.42	1.56414	0.244976	6.38488	1.72e-10	3.11e-09		la homolog	LA_AEDALLa homolog OS=Aedes albopictus OX=7160 PE=1 SV=1	INVnr_XP_001867380.1_lupus_la_ribonucleoprotein_[Culex_quinquefasciatus]
CPIJ000323	conserved hypothetical protein	10.9316	1.56287	0.454119	3.44154	0.000578414	0.00255445		bromodomain-containing 4-like	---NA---	INVnr_XP_001841896.1_conserved_hypothetical_protein_[Culex_quinquefasciatus]
CPIJ004373	UDP-glucuronosyltransferase	50.4653	1.56157	0.255392	6.11442	9.69e-10	1.59e-08	cqu00040,cqu00053,cqu00830,cqu00860,cqu00980,cqu00982,cqu00983,cqu01100	UDP-glucuronosyltransferase 1-3-like	UD13_RATUDP-glucuronosyltransferase 1-3 OS=Rattus norvegicus OX=10116 GN=Ugt1a3 PE=2 SV=1	INVnr_XP_001846132.1_UDP-glucuronosyltransferase_[Culex_quinquefasciatus]
CPIJ000795	H/ACA ribonucleoprotein complex subunit 4	102.11	1.56088	0.201049	7.76369	8.25e-15	2.83e-13	cqu03008	H ACA ribonucleo complex subunit 4	DKC1_DROMEH ACA ribonucleo complex subunit 4 OS=Drosophila melanogaster OX=7227 GN=Nop60B PE=1 SV=1	INVnr_XP_001842601.1_H/ACA_ribonucleoprotein_complex_subunit_4_[Culex_quinquefasciatus]
CPIJ007052	protein VNG2075C	8.82206	1.55708	0.485672	3.20603	0.00134582	0.00530793		ribosome biogenesis TSR3 homolog	TSR3_MOUSERibosome biogenesis TSR3 homolog OS=Mus musculus OX=10090 GN=Tsr3 PE=1 SV=1	INVnr_XP_001848581.1_conserved_hypothetical_protein_[Culex_quinquefasciatus]
CPIJ004839	transmembrane and coiled-coil domain-containing protein 1	18.2585	1.55099	0.372619	4.16241	3.15e-05	0.00019805		transmembrane and coiled-coil domain-containing 1	TMCO1_DANRECalcium load-activated calcium channel OS=Danio rerio OX=7955 GN=tmco1 PE=2 SV=1	INVnr_XP_001846488.1_transmembrane_and_coiled-coil_domain-containing_protein_1_[Culex_quinquefasciatus]
CPIJ006320	rieske-domain protein Neverland	199.759	1.55061	0.201858	7.68167	1.57e-14	5.17e-13	cqu00981	rieske-domain Neverland	DAF36_CAEELCholesterol 7-desaturase OS=Caenorhabditis elegans OX=6239 GN=daf-36 PE=1 SV=2	INVnr_XP_001848026.1_rieske-domain_protein_Neverland_[Culex_quinquefasciatus]
CPIJ015475	thiamin pyrophosphokinase 1	9.87802	1.54589	0.460838	3.35452	0.000795038	0.00338998	cqu00730,cqu01100	thiamin pyrophosphokinase 1	TPK1_HUMANThiamin pyrophosphokinase 1 OS=Homo sapiens OX=9606 GN=TPK1 PE=1 SV=1	INVnr_XP_001865581.1_thiamin_pyrophosphokinase_1_[Culex_quinquefasciatus]
CPIJ014901	conserved hypothetical protein	17.2511	1.53713	0.378355	4.06268	4.85e-05	0.000291824		conserved hypothetical protein	---NA---	INVnr_XP_001865242.1_conserved_hypothetical_protein_[Culex_quinquefasciatus]
CPIJ006768	phosphomannomutase	48.2631	1.5359	0.266337	5.76675	8.08e-09	1.13e-07	cqu00051,cqu00520,cqu01100	probable phosphomannomutase	PMM_DROMEProbable phosphomannomutase OS=Drosophila melanogaster OX=7227 GN=CG10688 PE=2 SV=1	INVnr_XP_001848159.1_phosphomannomutase_[Culex_quinquefasciatus]
CPIJ020069	methionine aminopeptidase 2	29.0098	1.53502	0.310175	4.94888	7.46e-07	6.86e-06		methionine aminopeptidase 2	MAP2_MOUSEMethionine aminopeptidase 2 OS=Mus musculus OX=10090 GN=Metap2 PE=1 SV=1	INVnr_XP_001870451.1_methionine_aminopeptidase_2_[Culex_quinquefasciatus]
CPIJ012829	fibrinogen and fibronectin	298.673	1.53463	0.170907	8.97928	2.73e-19	1.57e-17		fibrinogen and fibronectin	FCN1_PIGFicolin-1 OS=Sus scrofa OX=9823 GN=FCN1 PE=1 SV=1	INVnr_XP_001863537.1_fibrinogen_and_fibronectin_[Culex_quinquefasciatus]
CPIJ011915	multisynthetase complex, auxiliary protein, p38, putative	42.1658	1.53055	0.278507	5.49554	3.9e-08	4.67e-07		probable aminoacyl tRNA synthase complex-interacting multifunctional 2 isoform X2	AIMP2_DROMEProbable aminoacyl tRNA synthase complex-interacting multifunctional 2 OS=Drosophila melanogaster OX=7227 GN=AIMP2 PE=3 SV=1	INVnr_XP_001862128.1_multisynthetase_complex,_auxiliary_protein,_p38_[Culex_quinquefasciatus]
CPIJ000119	kelch domain-containing protein 4	28.1599	1.52993	0.323205	4.7336	2.21e-06	1.83e-05		kelch domain-containing 4	KLDC4_MOUSEKelch domain-containing 4 OS=Mus musculus OX=10090 GN=Klhdc4 PE=2 SV=2	INVnr_XP_001841789.1_kelch_domain-containing_protein_4_[Culex_quinquefasciatus]
CPIJ006517	hypothetical protein	16.0302	1.52989	0.396783	3.85572	0.000115387	0.000625917		vitelline membrane Vm26Ab-like	---NA---	INVnr_XP_001848201.1_hypothetical_protein_CpipJ_CPIJ006517_[Culex_quinquefasciatus]
CPIJ006849	galactosyltransferase	6.31505	1.52858	0.520441	2.93708	0.00331318	0.0114534	cqu00514	beta-1,3-glucosyltransferase isoform X1	B3GLT_MOUSEBeta-1,3-glucosyltransferase OS=Mus musculus OX=10090 GN=B3glct PE=1 SV=3	INVnr_XP_001848397.1_galactosyltransferase_[Culex_quinquefasciatus]
CPIJ018627	glutathione S-transferase 1-1	538.334	1.52398	0.133125	11.4477	2.42e-30	3.4e-28	cqu00480,cqu00980,cqu00982	glutathione S-transferase epsilon 2	GSTT1_MANSEGlutathione S-transferase 1 OS=Manduca sexta OX=7130 GN=GST1 PE=2 SV=1	INVnr_XP_001868770.1_glutathione_S-transferase_1-1_[Culex_quinquefasciatus]
CPIJ003580	cle7, putative	9.7822	1.52083	0.457864	3.32158	0.000895099	0.00372306		UPF0568 C14orf166	RTRAF_PONABRNA translation and transport factor OS=Pongo abelii OX=9601 GN=RTRAF PE=2 SV=1	INVnr_XP_001845248.1_cle7_[Culex_quinquefasciatus]
CPIJ002523	spermidine synthase	37.5308	1.51975	0.283556	5.35961	8.34e-08	9.31e-07	cqu00270,cqu00330,cqu00410,cqu00480,cqu01100	spermidine synthase	SPEE_MOUSESpermidine synthase OS=Mus musculus OX=10090 GN=Srm PE=1 SV=1	INVnr_XP_001844192.1_spermidine_synthase_[Culex_quinquefasciatus]
CPIJ007987	ATP-dependent RNA helicase DRS1	49.1537	1.51866	0.26342	5.76514	8.16e-09	1.14e-07		probable ATP-dependent RNA helicase DDX27	DDX27_HUMANProbable ATP-dependent RNA helicase DDX27 OS=Homo sapiens OX=9606 GN=DDX27 PE=1 SV=2	INVnr_XP_001849941.1_ATP-dependent_RNA_helicase_DRS1_[Culex_quinquefasciatus]
CPIJ001771	3-oxoacyl-[acyl-carrier-protein] reductase	166.866	1.51841	0.182615	8.31482	9.19e-17	4.1e-15	cqu01100	3-oxoacyl-[acyl-carrier- ] reductase	DHB8_CANLFEstradiol 17-beta-dehydrogenase 8 OS=Canis lupus familiaris OX=9615 GN=HSD17B8 PE=3 SV=1	INVnr_XP_001843445.1_3-oxoacyl-[acyl-carrier-protein]_reductase_[Culex_quinquefasciatus]
CPIJ009167	cAMP and cAMP-inhibited cGMP 3,5-cyclic phosphodiesterase 10A	18.1694	1.51821	0.378661	4.00941	6.09e-05	0.000354657	cqu00230	probable 3 ,5 -cyclic phosphodiesterase pde-5	PDE5_CAEELProbable 3 ,5 -cyclic phosphodiesterase pde-5 OS=Caenorhabditis elegans OX=6239 GN=pde-5 PE=3 SV=3	INVnr_XP_001850655.1_cAMP_and_cAMP-inhibited_cGMP_3,5-cyclic_phosphodiesterase_10A_[Culex_quinquefasciatus]
CPIJ008583	DnaJ domain containing protein	43.0554	1.51679	0.272238	5.57157	2.52e-08	3.19e-07		domain containing	TIM14_DROMEMitochondrial import inner membrane translocase subunit TIM14 OS=Drosophila melanogaster OX=7227 GN=Tim14 PE=3 SV=2	INVnr_XP_001850179.1_DnaJ_domain_containing_protein_[Culex_quinquefasciatus]
CPIJ000250	conserved hypothetical protein	8.68274	1.51432	0.478837	3.16249	0.00156427	0.00602444		conserved hypothetical protein	MOX11_DROMEMOXD1 homolog 1 OS=Drosophila melanogaster OX=7227 GN=CG5235 PE=2 SV=2	INVnr_XP_001841823.1_conserved_hypothetical_protein_[Culex_quinquefasciatus]
CPIJ000415	phosphatidyltransferase	39.3356	1.5142	0.281346	5.38198	7.37e-08	8.32e-07	cqu00440,cqu00564,cqu00565,cqu01100	ethanolaminephosphotransferase 1-like isoform X1	EPT1_HUMANEthanolaminephosphotransferase 1 OS=Homo sapiens OX=9606 GN=SELENOI PE=1 SV=3	INVnr_XP_001842085.1_phosphatidyltransferase_[Culex_quinquefasciatus]
CPIJ002129	trypsin alpha-4 precursor	766.371	1.51118	0.148759	10.1586	3.03e-24	2.85e-22		trypsin alpha-4	COGS_LEPPGBrachyurin OS=Leptuca pugilator OX=6772 PE=1 SV=2	INVnr_XP_001843397.1_trypsin_alpha-4_[Culex_quinquefasciatus]
CPIJ008915	heat shock 70 kDa protein cognate 4	4656.59	1.51095	0.24896	6.06903	1.29e-09	2.07e-08	cqu03040,cqu04141,cqu04144,cqu04213	heat shock 70 kDa cognate 4	HSP7D_DROMEHeat shock 70 kDa cognate 4 OS=Drosophila melanogaster OX=7227 GN=Hsc70-4 PE=1 SV=3	INVnr_XP_001850527.1_heat_shock_70_kDa_protein_cognate_4_[Culex_quinquefasciatus]
CPIJ005675	NBP2b protein, putative	12.4474	1.50969	0.424353	3.55764	0.000374204	0.00175142		surfeit locus 6 homolog	SURF6_DROMESurfeit locus 6 homolog OS=Drosophila melanogaster OX=7227 GN=Surf6 PE=1 SV=1	INVnr_XP_001847224.1_NBP2b_protein_[Culex_quinquefasciatus]
CPIJ013804	hypothetical protein	168.341	1.5081	0.212667	7.09138	1.33e-12	3.4e-11	cqu00190,cqu01100	NADH dehydrogenase [ubiquinone] 1 alpha subcomplex subunit 7	NDUA7_MOUSENADH dehydrogenase	INVnr_XP_001863783.1_hypothetical_protein_CpipJ_CPIJ013804_[Culex_quinquefasciatus]
CPIJ007073	protein l(2)37Cc	143.403	1.5059	0.229102	6.57305	4.93e-11	9.81e-10		l(2)37Cc	L2CC_DROME l(2)37Cc OS=Drosophila melanogaster OX=7227 GN=l(2)37Cc PE=2 SV=2	INVnr_XP_001848602.1_l(2)37Cc_[Culex_quinquefasciatus]
CPIJ008983	ATP-dependent RNA helicase DBP8	13.0541	1.50453	0.412813	3.64459	0.000267816	0.00130644		probable ATP-dependent RNA helicase Dbp45A	DDX49_DROMEProbable ATP-dependent RNA helicase Dbp45A OS=Drosophila melanogaster OX=7227 GN=Dbp45A PE=2 SV=2	INVnr_XP_001850610.1_ATP-dependent_RNA_helicase_DBP8_[Culex_quinquefasciatus]
CPIJ004148	N-acetyllactosaminide beta-1,3-N-acetylglucosaminyltransferase, putative	115.514	1.50422	0.212938	7.06411	1.62e-12	4.07e-11		beta-1,4-glucuronyltransferase 1-like	B4GA1_DANREBeta-1,4-glucuronyltransferase 1 OS=Danio rerio OX=7955 GN=b4gat1 PE=2 SV=1	INVnr_XP_001845872.1_N-acetyl_lactosaminide_beta-1,3-N-acetyl_glucosaminyl_transferase_[Culex_quinquefasciatus]
CPIJ009233	sprouty	5.14444	1.50386	0.549663	2.73598	0.00621952	0.0194886	cqu04013	sprouty isoform X1	SPY_DROME sprouty OS=Drosophila melanogaster OX=7227 GN=sty PE=1 SV=2	INVnr_XP_001851143.1_sprouty_[Culex_quinquefasciatus]
CPIJ012907	luciferin 4-monooxygenase	159.124	1.50341	0.42194	3.56309	0.000366512	0.00171885		luciferin 4-monooxygenase	4CL3_DICDIProbable 4-coumarate-- ligase 3 OS=Dictyostelium discoideum OX=44689 GN=4cl3 PE=3 SV=2	INVnr_XP_001862983.1_luciferin_4-monooxygenase_[Culex_quinquefasciatus]
CPIJ005390	conserved hypothetical protein	14.4501	1.50198	0.421614	3.56246	0.000367396	0.00172185		TP53-regulated inhibitor of apoptosis 1	TRIA1_HUMANTP53-regulated inhibitor of apoptosis 1 OS=Homo sapiens OX=9606 GN=TRIAP1 PE=1 SV=1	INVnr_XP_001847339.1_conserved_hypothetical_protein_[Culex_quinquefasciatus]
CPIJ014050	predicted protein	90.1312	1.49828	0.214124	6.99726	2.61e-12	6.32e-11	cqu00190,cqu01100	cytochrome c oxidase copper chaperone	COX17_CANLFCytochrome c oxidase copper chaperone OS=Canis lupus familiaris OX=9615 GN=COX17 PE=3 SV=3	INVnr_XP_001864148.1_predicted_protein_[Culex_quinquefasciatus]
CPIJ007468	conserved hypothetical protein	16.4684	1.49606	0.38622	3.87359	0.000107243	0.000586053		translation machinery-associated 16 homolog	TMA16_DROMETranslation machinery-associated 16 homolog OS=Drosophila melanogaster OX=7227 GN=CG15027 PE=2 SV=2	INVnr_XP_001848638.1_conserved_hypothetical_protein_[Culex_quinquefasciatus]
CPIJ010488	DEAD box ATP-dependent RNA helicase	68.4868	1.49287	0.243185	6.13882	8.31e-10	1.37e-08		probable ATP-dependent RNA helicase pitchoune	DDX18_DROMEProbable ATP-dependent RNA helicase pitchoune OS=Drosophila melanogaster OX=7227 GN=pit PE=2 SV=2	INVnr_XP_001859201.1_DEAD_box_ATP-dependent_RNA_helicase_[Culex_quinquefasciatus]
CPIJ007196	conserved hypothetical protein	362.567	1.49086	0.174172	8.55966	1.13e-17	5.46e-16	cqu04141	hypoxia up-regulated 1	HYOU1_DANREHypoxia up-regulated 1 OS=Danio rerio OX=7955 GN=hyou1 PE=2 SV=1	INVnr_XP_001849302.1_conserved_hypothetical_protein_[Culex_quinquefasciatus]
CPIJ003138	UNC93A protein, putative	503.747	1.48955	0.126789	11.7482	7.21e-32	1.13e-29		UNC93A protein	UN93L_DROMEUNC93 OS=Drosophila melanogaster OX=7227 GN=CG4928 PE=2 SV=1	INVnr_XP_001844726.1_UNC93A_protein_[Culex_quinquefasciatus]
CPIJ018717	conserved hypothetical protein	68.7336	1.482	0.265721	5.57729	2.44e-08	3.11e-07		F-box LRR-repeat 4-like	---NA---	INVnr_XP_001868929.1_conserved_hypothetical_protein_[Culex_quinquefasciatus]
CPIJ002055	laminin subunit gamma-1 precursor	226.452	1.47229	0.181134	8.1282	4.36e-16	1.71e-14	cqu04512	laminin subunit gamma-1	LAMC1_DROMELaminin subunit gamma-1 OS=Drosophila melanogaster OX=7227 GN= 2 PE=2 SV=2	INVnr_XP_001843323.1_laminin_subunit_gamma-1_[Culex_quinquefasciatus]
CPIJ008108	conserved hypothetical protein	62.0084	1.46978	0.251265	5.84951	4.93e-09	7.13e-08		nose resistant to fluoxetine 6-like	NRF6_CAEELNose resistant to fluoxetine 6 OS=Caenorhabditis elegans OX=6239 GN=nrf-6 PE=1 SV=3	INVnr_XP_001849840.1_conserved_hypothetical_protein_[Culex_quinquefasciatus]
CPIJ000615	clip-domain serine protease, putative	19.5622	1.46848	0.370477	3.96374	7.38e-05	0.000422169		clip-domain serine protease	GRASS_DROMESerine protease grass OS=Drosophila melanogaster OX=7227 GN=grass PE=1 SV=1	INVnr_XP_001842378.1_clip-domain_serine_protease_[Culex_quinquefasciatus]
CPIJ009363	U3 small nucleolar ribonucleoprotein protein MPP10	38.0307	1.46727	0.300284	4.88628	1.03e-06	9.11e-06	cqu03008	U3 small nucleolar ribonucleo MPP10	MPP10_HUMANU3 small nucleolar ribonucleo MPP10 OS=Homo sapiens OX=9606 GN=MPHOSPH10 PE=1 SV=2	INVnr_XP_001850858.1_U3_small_nucleolar_ribonucleoprotein_protein_MPP10_[Culex_quinquefasciatus]
CPIJ015325	protein AFG2	11.0155	1.46691	0.451853	3.24642	0.00116865	0.00469595	cqu03008	spermatogenesis-associated 5	SPAT5_MOUSESpermatogenesis-associated 5 OS=Mus musculus OX=10090 GN=Spata5 PE=1 SV=2	INVnr_XP_001865273.1_AFG2_[Culex_quinquefasciatus]
CPIJ005010	fibrillarin	214.059	1.46464	0.168802	8.67664	4.08e-18	2.07e-16	cqu03008	rRNA 2 -O-methyltransferase fibrillarin	FBRL_DROM 2 -O-methyltransferase fibrillarin OS=Drosophila melanogaster OX=7227 GN=Fib PE=2 SV=1	INVnr_XP_001846651.1_fibrillarin_[Culex_quinquefasciatus]
CPIJ015729	apolipoprotein D, putative	16.7577	1.46046	0.378784	3.85564	0.000115427	0.000625917		apolipo D	APOD_CAVPOApolipo D OS=Cavia porcellus OX=10141 GN=APOD PE=2 SV=1	INVnr_XP_001866792.1_apolipoprotein_D_[Culex_quinquefasciatus]
CPIJ011578	mitochondrial ribosomal protein L30	44.8286	1.45896	0.272619	5.35162	8.72e-08	9.7e-07	cqu03010	mitochondrial ribosomal L30	RM30_BOVIN39S ribosomal mitochondrial OS=Bos taurus OX=9913 GN=MRPL30 PE=1 SV=1	INVnr_XP_001862205.1_mitochondrial_ribosomal_protein_L30_[Culex_quinquefasciatus]
CPIJ007982	conserved hypothetical protein	9.95651	1.45624	0.458061	3.17914	0.00147714	0.00573275		tudor domain-containing 7A-like isoform X2	TDRD7_XENLATudor domain-containing 7 OS=Xenopus laevis OX=8355 GN=tdrd7 PE=2 SV=1	INVnr_XP_001849936.1_conserved_hypothetical_protein_[Culex_quinquefasciatus]
CPIJ006520	conserved hypothetical protein	10.4109	1.45175	0.445186	3.26099	0.00111022	0.00448933		TM2 domain-containing almondex-like	AMX_DROMETM2 domain-containing almondex OS=Drosophila melanogaster OX=7227 GN=amx PE=2 SV=1	INVnr_XP_001848204.1_conserved_hypothetical_protein_[Culex_quinquefasciatus]
CPIJ005783	signal peptidase complex subunit 1	102.816	1.45166	0.20706	7.01085	2.37e-12	5.83e-11	cqu03060	signal peptidase complex subunit 1	SPCS1_DROMESignal peptidase complex subunit 1 OS=Drosophila melanogaster OX=7227 GN=Spase12 PE=1 SV=2	INVnr_XP_001847267.1_signal_peptidase_complex_subunit_1_[Culex_quinquefasciatus]
CPIJ004454	conserved hypothetical protein	373.489	1.45091	0.34001	4.26725	1.98e-05	0.000130893	cqu03018	heat shock 70 kDa cognate 5	HSP7E_DROMEHeat shock 70 kDa cognate 5 OS=Drosophila melanogaster OX=7227 GN=Hsc70-5 PE=1 SV=2	INVnr_XP_001846040.1_conserved_hypothetical_protein_[Culex_quinquefasciatus]
CPIJ005587	s-adenosylmethionine decarboxylase	39.9021	1.4499	0.27792	5.21696	1.82e-07	1.88e-06		s-adenosyl methionine decarboxylase	DCAM_HUMANS-adenosylmethionine decarboxylase proenzyme OS=Homo sapiens OX=9606 GN=AMD1 PE=1 SV=2	INVnr_XP_001847039.1_s-adenosyl_methionine_decarboxylase_[Culex_quinquefasciatus]
CPIJ007327	protein disulfide-isomerase A6 precursor	449.58	1.44612	0.144732	9.99168	1.66e-23	1.44e-21	cqu04141	disulfide-isomerase A6 homolog	PDIA6_DROME disulfide-isomerase A6 homolog OS=Drosophila melanogaster OX=7227 GN= 1 PE=1 SV=1	INVnr_XP_001848695.1_disulfide-isomerase_A6_[Culex_quinquefasciatus]
CPIJ013697	tricarboxylate transport protein, mitochondrial precursor	87.5493	1.44199	0.216895	6.64835	2.96e-11	6.09e-10		tricarboxylate transport mitochondrial	TXTP_CAEEL tricarboxylate transport mitochondrial OS=Caenorhabditis elegans OX=6239 GN= PE=3 SV=1	INVnr_XP_001864030.1_tricarboxylate_transport_protein,_mitochondrial_[Culex_quinquefasciatus]
CPIJ003835	conserved hypothetical protein	5.40186	1.43914	0.539893	2.66561	0.00768488	0.0234441		microsomal triglyceride transfer large subunit	MTP_BOVINMicrosomal triglyceride transfer large subunit (Fragment) OS=Bos taurus OX=9913 GN=MTTP PE=1 SV=1	INVnr_XP_001845472.1_conserved_hypothetical_protein_[Culex_quinquefasciatus]
CPIJ000981	prohibitin-2	196.799	1.43583	0.20612	6.96599	3.26e-12	7.73e-11		prohibitin-2 isoform X4	PHB2_MOUSEProhibitin-2 OS=Mus musculus OX=10090 GN=Phb2 PE=1 SV=1	INVnr_XP_001842651.1_prohibitin-2_[Culex_quinquefasciatus]
CPIJ012702	conserved hypothetical protein	34.1109	1.43509	0.349953	4.10081	4.12e-05	0.00025306		conserved hypothetical protein	---NA---	INVnr_XP_001863908.1_conserved_hypothetical_protein_[Culex_quinquefasciatus]
CPIJ010392	PET191 polypeptide, putative	17.7324	1.43304	0.376511	3.80612	0.000141163	0.000742609		PET191 polypeptide	COA5_BOVINCytochrome c oxidase assembly factor 5 OS=Bos taurus OX=9913 GN=COA5 PE=3 SV=1	INVnr_XP_001870890.1_PET191_polypeptide_[Culex_quinquefasciatus]
CPIJ011616	serine collagenase 1 precursor, putative	1465.53	1.4319	0.117677	12.1681	4.6e-34	8.31e-32		serine collagenase 1	CTRC_HUMANChymotrypsin-C OS=Homo sapiens OX=9606 GN=CTRC PE=1 SV=2	INVnr_XP_001861673.1_serine_collagenase_1_[Culex_quinquefasciatus]
CPIJ001742	zinc carboxypeptidase	243.582	1.43185	0.373245	3.83623	0.000124939	0.000671811		zinc carboxypeptidase	CBPA1_ANOGAZinc carboxypeptidase A 1 OS=Anopheles gambiae OX=7165 GN=AGAP009593 PE=2 SV=3	INVnr_XP_001843607.1_zinc_carboxypeptidase_[Culex_quinquefasciatus]
CPIJ000134	phosphatidate phosphatase	259.232	1.4316	0.354238	4.04135	5.31e-05	0.000315635	cqu00561,cqu00564,cqu00565,cqu00600,cqu01100	phosphatidate phosphatase	WUN_DROME phosphatidate phosphatase OS=Drosophila melanogaster OX=7227 GN=wun PE=1 SV=2	INVnr_XP_001841804.1_phosphatidate_phosphatase_[Culex_quinquefasciatus]
CPIJ016651	HemK methyltransferase family member 1	9.91485	1.43056	0.460993	3.10321	0.00191437	0.0071804		methyltransferase family member 1	HEMK1_MOUSE methyltransferase family member 1 OS=Mus musculus OX=10090 GN=Hemk1 PE=2 SV=2	INVnr_XP_001866716.1_HemK_methyltransferase_family_member_1_[Culex_quinquefasciatus]
CPIJ006110	conserved hypothetical protein	16.9041	1.42995	0.38346	3.72908	0.000192183	0.000975317		COMM domain-containing 10	---NA---	INVnr_XP_001847993.1_conserved_hypothetical_protein_[Culex_quinquefasciatus]
CPIJ013968	conserved hypothetical protein	10.5939	1.42778	0.447938	3.18746	0.00143529	0.00558912		nucleolar 12-like	NOL12_XENTRNucleolar 12 OS=Xenopus tropicalis OX=8364 GN=nol12 PE=2 SV=1	INVnr_XP_001864753.1_conserved_hypothetical_protein_[Culex_quinquefasciatus]
CPIJ019606	asparagine synthetase, putative	11.5972	1.42737	0.435351	3.27867	0.00104299	0.00424917	cqu00250,cqu01100	asparagine synthetase	ASNS_DICDIProbable asparagine synthetase	INVnr_XP_001870015.1_asparagine_synthetase_[Culex_quinquefasciatus]
CPIJ013678	conserved hypothetical protein	12.048	1.42711	0.426507	3.34605	0.000819719	0.00347419		conserved hypothetical protein	---NA---	INVnr_XP_001863771.1_conserved_hypothetical_protein_[Culex_quinquefasciatus]
CPIJ015538	endonuclease G, mitochondrial precursor	17.2177	1.42693	0.382622	3.72934	0.000191979	0.000974982		endonuclease mitochondrial	NUCG_CAEELEndonuclease mitochondrial OS=Caenorhabditis elegans OX=6239 GN=cps-6 PE=1 SV=1	INVnr_XP_001865830.1_endonuclease_G,_mitochondrial_[Culex_quinquefasciatus]
CPIJ016072	SEC63 protein, putative	22.6179	1.42613	0.347554	4.10334	4.07e-05	0.000250743		translocation SEC63 homolog	SEC63_PONABTranslocation SEC63 homolog OS=Pongo abelii OX=9601 GN=SEC63 PE=2 SV=1	INVnr_XP_001867124.1_SEC63_protein_[Culex_quinquefasciatus]
CPIJ010925	heat shock protein 70	438.822	1.42599	0.192167	7.42056	1.17e-13	3.44e-12		heat shock 70	STIP1_BOVINStress-induced-phospho 1 OS=Bos taurus OX=9913 GN=STIP1 PE=2 SV=1	INVnr_XP_001857580.1_heat_shock_protein_70_[Culex_quinquefasciatus]
CPIJ010572	preimplantation protein 3	18.4423	1.42585	0.36379	3.91944	8.88e-05	0.000495793		preimplantation 3	MOB4_DROMEMOB kinase activator-like 4 OS=Drosophila melanogaster OX=7227 GN=Mob4 PE=2 SV=1	INVnr_XP_001870808.1_preimplantation_protein_3_[Culex_quinquefasciatus]
CPIJ001128	valacyclovir hydrolase, putative	43.4329	1.42527	0.302714	4.70829	2.5e-06	2.04e-05		valacyclovir hydrolase	KRAK_DROMEProbable serine hydrolase OS=Drosophila melanogaster OX=7227 GN=kraken PE=2 SV=1	INVnr_XP_001842797.1_valacyclovir_hydrolase_[Culex_quinquefasciatus]
CPIJ004849	eukaryotic translation initiation factor 4 gamma	54.064	1.42426	0.257942	5.52162	3.36e-08	4.14e-07	cqu03013	eukaryotic translation initiation factor 4 gamma	IF4G3_MOUSEEukaryotic translation initiation factor 4 gamma 3 OS=Mus musculus OX=10090 GN=Eif4g3 PE=1 SV=2	INVnr_XP_001846498.1_eukaryotic_translation_initiation_factor_4_gamma_[Culex_quinquefasciatus]
CPIJ011934	succinyl-coa:3-ketoacid-coenzyme a transferase	117.096	1.42204	0.217267	6.54512	5.94e-11	1.17e-09	cqu00072,cqu00280,cqu00650	succinyl- :3-ketoacid coenzyme A transferase mitochondrial isoform X2	SCOT1_HUMANSuccinyl- :3-ketoacid coenzyme A transferase mitochondrial OS=Homo sapiens OX=9606 GN=OXCT1 PE=1 SV=1	INVnr_XP_001862147.1_succinyl-coa:3-ketoacid-coenzyme_a_transferase_[Culex_quinquefasciatus]
CPIJ007346	TTC27 protein	18.3548	1.41959	0.372563	3.81034	0.000138776	0.00073264		tetratricopeptide repeat 27-like	TTC27_CHICKTetratricopeptide repeat 27 OS=Gallus gallus OX=9031 GN=TTC27 PE=2 SV=1	INVnr_XP_001849148.1_TTC27_protein_[Culex_quinquefasciatus]
CPIJ014218	CYP9M10: cytochrome P450 9M10	806.161	1.41566	0.159479	8.87674	6.88e-19	3.85e-17		cytochrome P450	CP9E2_BLAGECytochrome P450 9e2 OS=Blattella germanica OX=6973 GN=CYP9E2 PE=2 SV=1	INVnr_XP_001864297.1_cytochrome_P450_9b2_[Culex_quinquefasciatus]
CPIJ015637	antioxidant enzyme	80.5388	1.41322	0.217627	6.49377	8.37e-11	1.61e-09		antioxidant enzyme	ATOX1_CANLFCopper transport ATOX1 OS=Canis lupus familiaris OX=9615 GN=ATOX1 PE=3 SV=1	INVnr_XP_001865898.1_antioxidant_enzyme_[Culex_quinquefasciatus]
CPIJ010320	conserved hypothetical protein	33.3086	1.41055	0.295745	4.76949	1.85e-06	1.55e-05		conserved hypothetical protein	---NA---	INVnr_XP_001858986.1_conserved_hypothetical_protein_[Culex_quinquefasciatus]
CPIJ020138	conserved hypothetical protein	501.421	1.40466	0.17153	8.18903	2.63e-16	1.08e-14		conserved hypothetical protein	---NA---	INVnr_XP_001870557.1_conserved_hypothetical_protein_[Culex_quinquefasciatus]
CPIJ003898	mitochondrial import inner membrane translocase subunit Tim17-A	91.9281	1.40206	0.20886	6.71291	1.91e-11	4.06e-10		mitochondrial import inner membrane translocase subunit Tim17-A	TI17B_HUMANMitochondrial import inner membrane translocase subunit Tim17-B OS=Homo sapiens OX=9606 GN=TIMM17B PE=1 SV=1	INVnr_XP_001845566.1_mitochondrial_import_inner_membrane_translocase_subunit_Tim17-A_[Culex_quinquefasciatus]
CPIJ015281	conserved hypothetical protein	66.4337	1.40134	0.242022	5.79011	7.03e-09	9.95e-08		dnaJ 60	---NA---	INVnr_XP_001865526.1_conserved_hypothetical_protein_[Culex_quinquefasciatus]
CPIJ006169	WD repeat protein 74	22.4216	1.39963	0.343883	4.07006	4.7e-05	0.000284203		WD repeat 74	WDR74_BOVINWD repeat-containing 74 OS=Bos taurus OX=9913 GN=WDR74 PE=2 SV=1	INVnr_XP_001847613.1_WD_repeat_protein_74_[Culex_quinquefasciatus]
CPIJ008401	nucleolar protein 66	13.1658	1.39962	0.421236	3.32266	0.000891651	0.00371425		nucleolar 66	NO66_CULQUBifunctional lysine-specific demethylase and histidyl-hydroxylase NO66 OS=Culex quinquefasciatus OX=7176 GN=CPIJ008401 PE=3 SV=1	INVnr_XP_001849897.1_nucleolar_protein_66_[Culex_quinquefasciatus]
CPIJ010515	phosphoenolpyruvate carboxykinase	8.98994	1.39882	0.463047	3.0209	0.00252029	0.00906685	cqu00010,cqu00020,cqu00620,cqu01100,cqu04068	phosphoenolpyruvate carboxykinase	PCKG_DROMEPhosphoenolpyruvate carboxykinase	INVnr_XP_001859363.1_phosphoenolpyruvate_carboxykinase_[Culex_quinquefasciatus]
CPIJ018157	exosome complex exonuclease RRP46	8.01214	1.39866	0.482878	2.8965	0.00377353	0.0128038	cqu03018	---NA---	EXOS5_HUMANExosome complex component RRP46 OS=Homo sapiens OX=9606 GN=EXOSC5 PE=1 SV=1	INVnr_XP_001868566.1_exosome_complex_exonuclease_RRP46_[Culex_quinquefasciatus]
CPIJ009793	glioma tumor suppressor candidate region gene 2 protein	50.3812	1.39774	0.264704	5.2804	1.29e-07	1.38e-06		glioma tumor suppressor candidate region gene 2	NOP53_DROMERibosome biogenesis NOP53 OS=Drosophila melanogaster OX=7227 GN=CG1785 PE=2 SV=1	INVnr_XP_001851341.1_glioma_tumor_suppressor_candidate_region_gene_2_protein_[Culex_quinquefasciatus]
CPIJ002140	chymotrypsin BI precursor	1137.03	1.39461	0.299442	4.65735	3.2e-06	2.54e-05		chymotrypsin BI	COGS_HYPLICollagenase OS=Hypoderma lineatum OX=7389 PE=1 SV=3	INVnr_XP_001843408.1_chymotrypsin_BI_[Culex_quinquefasciatus]
CPIJ012513	tetratricopeptide repeat protein 4	11.8148	1.39438	0.43571	3.20024	0.00137314	0.00538536		tetratricopeptide repeat 4	TTC4_HUMANTetratricopeptide repeat 4 OS=Homo sapiens OX=9606 GN=TTC4 PE=1 SV=3	INVnr_XP_001862488.1_tetratricopeptide_repeat_protein_4_[Culex_quinquefasciatus]
CPIJ002058	conserved hypothetical protein	241.336	1.39094	0.151868	9.15884	5.25e-20	3.33e-18		proton-coupled amino acid transporter pathetic isoform X1	PATH_DROMEProton-coupled amino acid transporter pathetic OS=Drosophila melanogaster OX=7227 GN=path PE=1 SV=1	INVnr_XP_001843326.1_conserved_hypothetical_protein_[Culex_quinquefasciatus]
CPIJ005551	short-chain dehydrogenase	66.3071	1.39079	0.232299	5.98706	2.14e-09	3.29e-08		short-chain dehydrogenase	CSGA_MYXXAC-factor OS=Myxococcus xanthus OX=34 GN=csgA PE=1 SV=1	INVnr_XP_001847792.1_short-chain_dehydrogenase_[Culex_quinquefasciatus]
CPIJ039947	SNORA73: Small nucleolar RNA SNORA73 family	5.31632	1.38937	0.541853	2.56411	0.0103441	0.0299974		---NA---	---NA---	NA
CPIJ010562	aromatic amino acid decarboxylase	70.4095	1.38706	0.259284	5.34957	8.82e-08	9.76e-07		aromatic amino acid decarboxylase	TDC1_CAEELTyrosine decarboxylase OS=Caenorhabditis elegans OX=6239 GN=tdc-1 PE=2 SV=1	INVnr_XP_001870798.1_aromatic_amino_acid_decarboxylase_[Culex_quinquefasciatus]
CPIJ017722	gamma glutamyl transpeptidases	122.245	1.38603	0.246021	5.63378	1.76e-08	2.32e-07	cqu00430,cqu00480,cqu00590,cqu01100	gamma glutamyl transpeptidase	GGT1_RATGlutathione hydrolase 1 proenzyme OS=Rattus norvegicus OX=10116 GN=Ggt1 PE=1 SV=4	INVnr_XP_001867920.1_gamma_glutamyl_transpeptidase_[Culex_quinquefasciatus]
CPIJ016740	conserved hypothetical protein	20.7229	1.38531	0.359045	3.85831	0.000114172	0.00062007		acyl-coenzyme A thioesterase 13-like	ACO13_MOUSEAcyl-coenzyme A thioesterase 13 OS=Mus musculus OX=10090 GN=Acot13 PE=1 SV=1	INVnr_XP_001866940.1_conserved_hypothetical_protein_[Culex_quinquefasciatus]
CPIJ003997	nuclear pore complex protein Nup107	20.1942	1.38484	0.360102	3.84567	0.000120223	0.000648432	cqu03013	nuclear pore complex Nup107	NU107_DROMENuclear pore complex Nup107 OS=Drosophila melanogaster OX=7227 GN=Nup107 PE=1 SV=1	INVnr_XP_001845583.1_nuclear_pore_complex_protein_Nup107_[Culex_quinquefasciatus]
CPIJ008928	cationic amino acid transporter	114.044	1.3812	0.204681	6.74807	1.5e-11	3.2e-10		cationic amino acid transporter	BAT1_HUMANb(0,+)-type amino acid transporter 1 OS=Homo sapiens OX=9606 GN=SLC7A9 PE=1 SV=1	INVnr_XP_001851014.1_cationic_amino_acid_transporter_[Culex_quinquefasciatus]
CPIJ002543	phosphate transporter	281.22	1.38034	0.385203	3.58341	0.000339137	0.00160328		sodium-dependent phosphate transporter 2	S20A2_FELCASodium-dependent phosphate transporter 2 OS=Felis catus OX=9685 GN=SLC20A2 PE=1 SV=1	INVnr_XP_001844212.1_phosphate_transporter_[Culex_quinquefasciatus]
CPIJ004980	ATP-binding cassette sub-family A member 3	394.69	1.37323	0.163738	8.38673	5e-17	2.27e-15	cqu02010	ATP-binding cassette sub-family A member 3	ABCA3_HUMANATP-binding cassette sub-family A member 3 OS=Homo sapiens OX=9606 GN=ABCA3 PE=1 SV=2	INVnr_XP_001846621.1_ATP-binding_cassette_sub-family_A_member_3_[Culex_quinquefasciatus]
CPIJ010315	Juvenile hormone-inducible protein, putative	177.668	1.3715	0.176269	7.78072	7.21e-15	2.51e-13		Juvenile hormone-inducible	---NA---	INVnr_XP_001858962.1_Juvenile_hormone-inducible_protein_[Culex_quinquefasciatus]
CPIJ002340	conserved hypothetical protein	75.9029	1.37035	0.225988	6.0638	1.33e-09	2.13e-08		ABHD1-like	ABHD3_MOUSEPhospholipase ABHD3 OS=Mus musculus OX=10090 GN=Abhd3 PE=1 SV=1	INVnr_XP_001870235.1_conserved_hypothetical_protein_[Culex_quinquefasciatus]
CPIJ012841	valacyclovir hydrolase	16.8378	1.36898	0.395947	3.45748	0.000545257	0.00242321		probable serine hydrolase	KRAK_DROMEProbable serine hydrolase OS=Drosophila melanogaster OX=7227 GN=kraken PE=2 SV=1	INVnr_XP_001863581.1_valacyclovir_hydrolase_[Culex_quinquefasciatus]
CPIJ039594		12.6994	1.36452	0.415059	3.28754	0.00101068	0.00414149		---NA---	---NA---	NA
CPIJ011493	conserved hypothetical protein	9.39194	1.36413	0.455078	2.99758	0.00272135	0.00966773		CUE domain-containing 1	CUED1_HUMANCUE domain-containing 1 OS=Homo sapiens OX=9606 GN=CUEDC1 PE=1 SV=1	INVnr_XP_001861506.1_conserved_hypothetical_protein_[Culex_quinquefasciatus]
CPIJ000881	conserved hypothetical protein	140.815	1.36265	0.179542	7.5896	3.21e-14	1.03e-12		transmembrane 214-like isoform X1	TM214_BOVINTransmembrane 214 OS=Bos taurus OX=9913 GN=TMEM214 PE=2 SV=1	INVnr_XP_001842504.1_conserved_hypothetical_protein_[Culex_quinquefasciatus]
CPIJ019996	conserved hypothetical protein	40.1694	1.36089	0.289117	4.70706	2.51e-06	2.05e-05		conserved hypothetical protein	TMM53_DANRETransmembrane 53 OS=Danio rerio OX=7955 GN=tmem53 PE=2 SV=1	INVnr_XP_001870294.1_conserved_hypothetical_protein_[Culex_quinquefasciatus]
CPIJ013588	mitochondrial 28S ribosomal protein S2	27.2079	1.35924	0.314627	4.32015	1.56e-05	0.000107047	cqu03010	28S ribosomal mitochondrial	RT02_BOVIN28S ribosomal mitochondrial OS=Bos taurus OX=9913 GN=MRPS2 PE=1 SV=2	INVnr_XP_001863960.1_mitochondrial_28S_ribosomal_protein_S2_[Culex_quinquefasciatus]
CPIJ013920	aldehyde oxidase	828.894	1.35863	0.173711	7.82119	5.23e-15	1.83e-13	cqu00230,cqu00232,cqu00983,cqu01100,cqu04146	aldehyde oxidase	XDH_RATXanthine dehydrogenase oxidase OS=Rattus norvegicus OX=10116 GN=Xdh PE=1 SV=3	INVnr_XP_001864334.1_aldehyde_oxidase_[Culex_quinquefasciatus]
CPIJ005330	60S ribosome subunit biogenesis protein NIP7	22.2819	1.35843	0.345065	3.93674	8.26e-05	0.00046508		60S ribosome subunit biogenesis NIP7	NIP7_TETNG60S ribosome subunit biogenesis NIP7 homolog OS=Tetraodon nigroviridis OX=99883 GN=nip7 PE=3 SV=1	INVnr_XP_001846772.1_60S_ribosome_subunit_biogenesis_protein_NIP7_[Culex_quinquefasciatus]
CPIJ009657	conserved hypothetical protein	10.6303	1.35772	0.445221	3.04955	0.00229184	0.00836894		serine protease	NOP16_TETNGNucleolar 16 OS=Tetraodon nigroviridis OX=99883 GN=nop16 PE=3 SV=1	INVnr_XP_001851355.1_conserved_hypothetical_protein_[Culex_quinquefasciatus]
CPIJ009423	WD repeat protein	35.308	1.35584	0.287893	4.70951	2.48e-06	2.04e-05		WD repeat	NLE_DROME Notchless OS=Drosophila melanogaster OX=7227 GN=Nle PE=1 SV=2	INVnr_XP_001851092.1_WD_repeat_protein_[Culex_quinquefasciatus]
CPIJ005137	Sec61 protein complex gamma subunit, putative	434.543	1.34803	0.146989	9.17096	4.69e-20	3e-18	cqu03060,cqu04141,cqu04145	transport Sec61 subunit gamma	S61G1_DROME transport Sec61 gamma-1 subunit OS=Drosophila melanogaster OX=7227 GN=SEC61G1 PE=3 SV=1	INVnr_XP_019565483.1_PREDICTED:_protein_transport_protein_Sec61_subunit_gamma_[Aedes_albopictus]
CPIJ002128	mast cell protease 2 precursor	803.859	1.34443	0.139574	9.63235	5.84e-22	4.47e-20		mast cell protease 2	CTRB1_LITVAChymotrypsin BI OS=Litopenaeus vannamei OX=6689 PE=1 SV=1	INVnr_XP_001843396.1_mast_cell_protease_2_[Culex_quinquefasciatus]
CPIJ008853	maltose phosphorylase	287.323	1.34072	0.351921	3.80972	0.000139123	0.00073297		maltose phosphorylase	PGGHG_MOUSE -glucosylgalactosylhydroxylysine glucosidase OS=Mus musculus OX=10090 GN=Pgghg PE=1 SV=1	INVnr_XP_001850771.1_maltose_phosphorylase_[Culex_quinquefasciatus]
CPIJ008246	conserved hypothetical protein	678.005	1.33798	0.173126	7.72834	1.09e-14	3.71e-13		regulator of microtubule dynamics 1-like	RMD1_RATRegulator of microtubule dynamics 1 OS=Rattus norvegicus OX=10116 GN=Rmdn1 PE=2 SV=1	INVnr_XP_001849622.1_conserved_hypothetical_protein_[Culex_quinquefasciatus]
CPIJ019135	conserved hypothetical protein	16.2612	1.33737	0.382869	3.49302	0.000477585	0.0021662		conserved hypothetical protein	---NA---	INVnr_XP_001869485.1_conserved_hypothetical_protein_[Culex_quinquefasciatus]
CPIJ014394	tRNA-dihydrouridine synthase	8.73209	1.33553	0.477308	2.79805	0.00514122	0.0166123		tRNA-dihydrouridine(20a 20b) synthase [NAD(P)+]-like	DUS4L_HUMA -dihydrouridine(20a 20b) synthase	INVnr_XP_001864482.1_tRNA-dihydrouridine_synthase_[Culex_quinquefasciatus]
CPIJ015891	ischemia/reperfusion inducible protein	56.9779	1.333	0.243558	5.47304	4.42e-08	5.25e-07		ischemia reperfusion inducible	YRDC_RAT domain-containing mitochondrial OS=Rattus norvegicus OX=10116 GN=Yrdc PE=2 SV=1	INVnr_XP_001866124.1_ischemia/reperfusion_inducible_protein_[Culex_quinquefasciatus]
CPIJ001657	organic cation transporter protein	30.8376	1.33188	0.327824	4.06279	4.85e-05	0.000291824		organic cation transporter	ORCT_DROMEOrganic cation transporter OS=Drosophila melanogaster OX=7227 GN=Orct PE=1 SV=1	INVnr_XP_001843197.1_organic_cation_transporter_protein_[Culex_quinquefasciatus]
CPIJ004081	protein Peter pan	32.4589	1.3317	0.312908	4.25588	2.08e-05	0.000137209		Peter pan	PPAN_DROME Peter pan OS=Drosophila melanogaster OX=7227 GN=ppan PE=1 SV=1	INVnr_XP_001845711.1_Peter_pan_[Culex_quinquefasciatus]
CPIJ016849	CYPM12: cytochrome P450 6M12	358.568	1.32993	0.350753	3.79165	0.000149652	0.00078201		cytochrome P450 71B36	C6A23_DROMEProbable cytochrome P450 6a23 OS=Drosophila melanogaster OX=7227 GN=Cyp6a23 PE=2 SV=2	INVnr_XP_001867274.1_cytochrome_P450_71B36_[Culex_quinquefasciatus]
CPIJ016657	short-chain dehydrogenase	7.29541	1.3265	0.501989	2.64248	0.00823009	0.0247641		short-chain dehydrogenase	DHB13_HUMAN17-beta-hydroxysteroid dehydrogenase 13 OS=Homo sapiens OX=9606 GN=HSD17B13 PE=1 SV=1	INVnr_XP_001866722.1_short-chain_dehydrogenase_[Culex_quinquefasciatus]
CPIJ017840	39S ribosomal protein L12, mitochondrial precursor	73.2139	1.32611	0.224794	5.89925	3.65e-09	5.4e-08	cqu03010	50S ribosomal L7 L12	RM12_BOVIN39S ribosomal mitochondrial OS=Bos taurus OX=9913 GN=MRPL12 PE=1 SV=1	INVnr_XP_001867980.1_39S_ribosomal_protein_L12,_mitochondrial_[Culex_quinquefasciatus]
CPIJ017291	conserved hypothetical protein	6.14666	1.32409	0.523386	2.52985	0.011411	0.0325026		DNA damage-binding 1-like	DDB1_XENLADNA damage-binding 1 OS=Xenopus laevis OX=8355 GN=ddb1 PE=2 SV=1	INVnr_XP_001867587.1_conserved_hypothetical_protein,_partial_[Culex_quinquefasciatus]
CPIJ003897	transmembrane protein, putative	41.9099	1.31767	0.281107	4.68742	2.77e-06	2.25e-05		thioredoxin domain-containing	TXND_THEPAThioredoxin domain-containing OS=Theileria parva OX=5875 GN=TP02_0602 PE=1 SV=1	INVnr_XP_001845565.1_transmembrane_protein_[Culex_quinquefasciatus]
CPIJ008446	protein anon-37Cs	18.8598	1.31336	0.363098	3.61709	0.000297937	0.00143352		amine oxidase	PAOX_BOVINPeroxisomal N(1)-acetyl-spermine spermidine oxidase OS=Bos taurus OX=9913 GN=PAOX PE=1 SV=3	INVnr_XP_001849990.1_anon-37Cs_[Culex_quinquefasciatus]
CPIJ001930	conserved hypothetical protein	11.2484	1.31275	0.431666	3.04113	0.00235696	0.00857563		conserved hypothetical protein	---NA---	INVnr_XP_001843707.1_conserved_hypothetical_protein_[Culex_quinquefasciatus]
CPIJ000655	CYP329B1: cytochrome P450 329B1	65.6764	1.31105	0.235405	5.56935	2.56e-08	3.23e-07		cytochrome P450 9b2	CP9F2_DROMEProbable cytochrome P450 9f2 OS=Drosophila melanogaster OX=7227 GN=Cyp9f2 PE=2 SV=1	INVnr_XP_001842418.1_cytochrome_P450_9b2_[Culex_quinquefasciatus]
CPIJ007722	hypothetical protein	320.741	1.30823	0.148806	8.79151	1.48e-18	7.87e-17		hypothetical protein CpipJ_CPIJ007722	---NA---	INVnr_XP_001850183.1_hypothetical_protein_CpipJ_CPIJ007722_[Culex_quinquefasciatus]
CPIJ005148	conserved hypothetical protein	14.6763	1.30566	0.401658	3.25066	0.00115136	0.0046344		conserved hypothetical protein	---NA---	INVnr_XP_001846928.1_conserved_hypothetical_protein_[Culex_quinquefasciatus]
CPIJ005814	conserved hypothetical protein	6.44504	1.30517	0.511817	2.55007	0.0107701	0.0309117		probable RNA polymerase II nuclear localization SLC7A6OS	S7A6O_XENLAProbable RNA polymerase II nuclear localization SLC7A6OS OS=Xenopus laevis OX=8355 GN=slc7a6os PE=2 SV=1	INVnr_XP_001847835.1_conserved_hypothetical_protein_[Culex_quinquefasciatus]
CPIJ007981	conserved hypothetical protein	42.9507	1.30432	0.304157	4.2883	1.8e-05	0.000120672		tudor domain-containing 7A isoform X1	TDRD7_CANLFTudor domain-containing 7 OS=Canis lupus familiaris OX=9615 GN=TDRD7 PE=3 SV=1	INVnr_XP_001849935.1_conserved_hypothetical_protein_[Culex_quinquefasciatus]
CPIJ005468	adenosine diphosphatase	74.5258	1.30405	0.228834	5.6987	1.21e-08	1.63e-07	cqu00230,cqu00240	adenosine diphosphatase	ENTP5_BOVINEctonucleoside triphosphate diphosphohydrolase 5 OS=Bos taurus OX=9913 GN=ENTPD5 PE=3 SV=1	INVnr_XP_001847437.1_adenosine_diphosphatase_[Culex_quinquefasciatus]
CPIJ009249	tRNA	36.7418	1.30375	0.283689	4.59571	4.31e-06	3.34e-05		tRNA methyltransferase	TRM5_AEDA (guanine(37)-N1)-methyltransferase OS=Aedes aegypti OX=7159 GN=AAEL009603 PE=3 SV=1	INVnr_XP_001851159.1_tRNA_methyltransferase_[Culex_quinquefasciatus]
CPIJ005033	nucleolar protein NHP2	60.157	1.30289	0.241536	5.39418	6.88e-08	7.85e-07	cqu03008	H ACA ribonucleo complex subunit 2	NHP2_DROMEH ACA ribonucleo complex subunit 2 OS=Drosophila melanogaster OX=7227 GN=NHP2 PE=1 SV=1	INVnr_XP_001846874.1_nucleolar_protein_NHP2_[Culex_quinquefasciatus]
CPIJ009364	anamorsin, putative	51.1383	1.30174	0.286691	4.54055	5.61e-06	4.25e-05		anamorsin homolog	DRE2_CULQUAnamorsin homolog OS=Culex quinquefasciatus OX=7176 GN=CPIJ009364 PE=3 SV=1	INVnr_XP_001850859.1_anamorsin_[Culex_quinquefasciatus]
CPIJ017520	U3 small nucleolar ribonucleoprotein protein IMP3	32.8936	1.29493	0.297114	4.35836	1.31e-05	9.17e-05	cqu03008	U3 small nucleolar ribonucleo IMP3	IMP3_MOUSEU3 small nucleolar ribonucleo IMP3 OS=Mus musculus OX=10090 GN=Imp3 PE=2 SV=1	INVnr_XP_001867852.1_U3_small_nucleolar_ribonucleoprotein_protein_IMP3_[Culex_quinquefasciatus]
CPIJ019000	conserved hypothetical protein	16.1357	1.29472	0.389726	3.32212	0.000893365	0.00371919		polynucleotide 5 -hydroxyl-kinase NOL9	NOL9_DROMEPolynucleotide 5 -hydroxyl-kinase NOL9 OS=Drosophila melanogaster OX=7227 GN=CG8414 PE=2 SV=1	INVnr_XP_001869289.1_conserved_hypothetical_protein_[Culex_quinquefasciatus]
CPIJ001789	conserved hypothetical protein	11.5345	1.29402	0.434019	2.98148	0.00286859	0.0101184		adenosine monophosphate- transferase FICD homolog	FICD_CULQUAdenosine monophosphate- transferase Fic OS=Culex quinquefasciatus OX=7176 GN=CPIJ001789 PE=3 SV=1	INVnr_XP_001843463.1_conserved_hypothetical_protein_[Culex_quinquefasciatus]
CPIJ010410	tRNA-dihydrouridine synthase	22.6394	1.29387	0.364604	3.54871	0.00038713	0.00180234		tRNA-dihydrouridine synthase	DUS3L_XENL -dihydrouridine(47) synthase	INVnr_XP_001870922.1_tRNA-dihydrouridine_synthase_[Culex_quinquefasciatus]
CPIJ010003	T-complex protein 1 subunit gamma	26.7533	1.29381	0.315192	4.10484	4.05e-05	0.00024956		T-complex 1 subunit gamma	TCPG_DROMET-complex 1 subunit gamma OS=Drosophila melanogaster OX=7227 GN=CCT3 PE=2 SV=2	INVnr_XP_001870703.1_T-complex_protein_1_subunit_gamma_[Culex_quinquefasciatus]
CPIJ003379	suppressors of cytokine signalling	16.9793	1.2933	0.387204	3.34009	0.000837516	0.00352825		mucin-5AC isoform X1	SOCS5_MOUSESuppressor of cytokine signaling 5 OS=Mus musculus OX=10090 GN=Socs5 PE=1 SV=2	INVnr_XP_001844824.1_suppressorsof_cytokine_signalling_[Culex_quinquefasciatus]
CPIJ004872	protein phosphatase 2C isoform beta	36.5773	1.29294	0.281959	4.58556	4.53e-06	3.48e-05	cqu04013	phosphatase 1B isoform X1	PPM1B_RAT phosphatase 1B OS=Rattus norvegicus OX=10116 GN=Ppm1b PE=2 SV=1	INVnr_XP_001846521.1_phosphatase_2C_beta_[Culex_quinquefasciatus]
CPIJ000199	conserved hypothetical protein	12.2105	1.29005	0.426765	3.02286	0.00250399	0.00901282		conserved hypothetical protein	PBDC1_HUMAN PBDC1 OS=Homo sapiens OX=9606 GN=PBDC1 PE=1 SV=1	INVnr_XP_001841964.1_conserved_hypothetical_protein_[Culex_quinquefasciatus]
CPIJ019694	ceramide glucosyltransferase	159.589	1.28903	0.192611	6.69237	2.2e-11	4.64e-10	cqu00600,cqu01100	ceramide glucosyltransferase	CEGT_HUMANCeramide glucosyltransferase OS=Homo sapiens OX=9606 GN=UGCG PE=1 SV=1	INVnr_XP_001869890.1_ceramide_glucosyltransferase_[Culex_quinquefasciatus]
CPIJ001861	sodium/solute symporter	11.1727	1.28409	0.463157	2.77248	0.00556311	0.0177528		sodium-coupled monocarboxylate transporter 1 isoform X2	SC5A8_DANRESodium-coupled monocarboxylate transporter 1 OS=Danio rerio OX=7955 GN=slc5a8 PE=1 SV=1	INVnr_XP_001843638.1_sodium/solute_symporter_[Culex_quinquefasciatus]
CPIJ010518	phosphoenolpyruvate carboxykinase	285.371	1.28403	0.149296	8.60056	7.93e-18	3.88e-16	cqu00010,cqu00020,cqu00620,cqu01100,cqu04068	phosphoenolpyruvate carboxykinase	PCKG_DROMEPhosphoenolpyruvate carboxykinase	INVnr_XP_001859378.1_phosphoenolpyruvate_carboxykinase_[Culex_quinquefasciatus]
CPIJ016638	glycine cleavage system h protein	35.4868	1.28303	0.282142	4.54745	5.43e-06	4.13e-05	cqu00260,cqu00630,cqu01100,cqu01200	glycine cleavage system h	GCSH_DROMEGlycine cleavage system H mitochondrial OS=Drosophila melanogaster OX=7227 GN=ppl PE=2 SV=1	INVnr_XP_001866806.1_glycine_cleavage_system_h_protein_[Culex_quinquefasciatus]
CPIJ012341	malic enzyme	344.22	1.28297	0.379289	3.38256	0.00071813	0.00309768	cqu00620,cqu01100,cqu01200	malic enzyme	MAOX_ANAPLNADP-dependent malic enzyme OS=Anas platyrhynchos OX=8839 GN=ME1 PE=1 SV=1	INVnr_XP_001862425.1_malic_enzyme_[Culex_quinquefasciatus]
CPIJ011992	hypothetical protein	8.58106	1.28084	0.473163	2.70698	0.00678976	0.0210634		hypothetical protein CpipJ_CPIJ011992, partial	---NA---	INVnr_XP_001861964.1_hypothetical_protein_CpipJ_CPIJ011992,_partial_[Culex_quinquefasciatus]
CPIJ007068	mitosis protein dim1	10.5462	1.27604	0.437921	2.91387	0.00356982	0.0121772	cqu03040	mitosis dim1	TXN4A_MOUSEThioredoxin 4A OS=Mus musculus OX=10090 GN=Txnl4a PE=1 SV=1	INVnr_XP_001848597.1_mitosis_protein_dim1_[Culex_quinquefasciatus]
CPIJ006247	midline fasciclin	53.1749	1.27596	0.247236	5.16089	2.46e-07	2.49e-06		midline fasciclin	BGH3_MOUSETransforming growth factor-beta-induced ig-h3 OS=Mus musculus OX=10090 GN=Tgfbi PE=1 SV=1	INVnr_XP_001847648.1_midline_fasciclin_[Culex_quinquefasciatus]
CPIJ014691	FK506-binding protein 59	125.356	1.27473	0.231204	5.51342	3.52e-08	4.3e-07		FK506-binding 59	FKB59_DROMEFK506-binding 59 OS=Drosophila melanogaster OX=7227 GN=FKBP59 PE=1 SV=1	INVnr_XP_001865043.1_FK506-binding_protein_59_[Culex_quinquefasciatus]
CPIJ014953	membrane glycoprotein LIG-1, putative	11.3412	1.27323	0.427517	2.97821	0.00289941	0.0102168		toll-like receptor 6 isoform X1	NISCH_RATNischarin OS=Rattus norvegicus OX=10116 GN=Nisch PE=2 SV=2	INVnr_XP_001865846.1_membrane_glycoprotein_LIG-1_[Culex_quinquefasciatus]
CPIJ007901	peritrophin-1 precursor	61.5772	1.27305	0.24576	5.18005	2.22e-07	2.27e-06		peritrophin-1	CPG2_CAEBRChondroitin proteoglycan 2 OS=Caenorhabditis briggsae OX=6238 GN=cpg-2 PE=3 SV=2	INVnr_XP_001849535.1_peritrophin-1_[Culex_quinquefasciatus]
CPIJ015753	conserved hypothetical protein	16.7719	1.27252	0.38339	3.31914	0.000902948	0.00374801		transmembrane 87A	TM87A_XENTRTransmembrane 87A OS=Xenopus tropicalis OX=8364 GN=tmem87a PE=2 SV=1	INVnr_XP_001866238.1_conserved_hypothetical_protein_[Culex_quinquefasciatus]
CPIJ010589	conserved hypothetical protein	34.2655	1.27233	0.293678	4.3324	1.47e-05	0.000102058		programmed cell death 5-like	PDCD5_MOUSEProgrammed cell death 5 OS=Mus musculus OX=10090 GN=Pdcd5 PE=1 SV=3	INVnr_XP_001870825.1_conserved_hypothetical_protein_[Culex_quinquefasciatus]
CPIJ010147	signal peptidase complex subunit 2	199.585	1.27085	0.158182	8.0341	9.43e-16	3.65e-14	cqu03060	signal peptidase complex subunit 2	SPCS2_DROMESignal peptidase complex subunit 2 OS=Drosophila melanogaster OX=7227 GN=Spase25 PE=2 SV=1	INVnr_XP_001851505.1_signal_peptidase_complex_subunit_2_[Culex_quinquefasciatus]
CPIJ017859	alcohol sulfotransferase A	9.6489	1.27078	0.473421	2.68424	0.00726945	0.022351		alcohol sulfotransferase A	ST1A2_HUMANSulfotransferase 1A2 OS=Homo sapiens OX=9606 GN=SULT1A2 PE=1 SV=2	INVnr_XP_001869096.1_alcohol_sulfotransferase_A_[Culex_quinquefasciatus]
CPIJ020137	ceramidase	5.38526	1.27069	0.536572	2.36817	0.0178763	0.0476971		neutral ceramidase-like	NCASE_DROPSNeutral ceramidase OS=Drosophila pseudoobscura pseudoobscura OX=46245 GN=CDase PE=3 SV=1	INVnr_XP_001870533.1_ceramidase_[Culex_quinquefasciatus]
CPIJ006096	membrin	19.5436	1.26987	0.365654	3.47287	0.000514926	0.00230587	cqu04130	probable Golgi SNAP receptor complex member 2	GOSR2_DROMEProbable Golgi SNAP receptor complex member 2 OS=Drosophila melanogaster OX=7227 GN=Membrin PE=2 SV=1	INVnr_XP_001847979.1_membrin_[Culex_quinquefasciatus]
CPIJ016672	conserved hypothetical protein	12.3245	1.26943	0.425548	2.98304	0.00285404	0.0100771		mitochondrial import inner membrane translocase subunit Tim29	TIM29_HUMANMitochondrial import inner membrane translocase subunit Tim29 OS=Homo sapiens OX=9606 GN=TIMM29 PE=1 SV=2	INVnr_XP_001866905.1_conserved_hypothetical_protein_[Culex_quinquefasciatus]
CPIJ004739	adenylate cyclase	7.74762	1.26868	0.482337	2.63028	0.00853155	0.0255186	cqu00230,cqu04213	adenylate cyclase type 2 isoform X1	ADCY2_DROMEAdenylate cyclase type 2 OS=Drosophila melanogaster OX=7227 GN=Ac76E PE=2 SV=3	INVnr_XP_001846806.1_adenylate_cyclase_[Culex_quinquefasciatus]
CPIJ003163	conserved hypothetical protein	9.47191	1.26862	0.461305	2.75007	0.00595832	0.0187535	cqu04146	PXMP2 4 family 4	MP17L_XENLAMpv17 OS=Xenopus laevis OX=8355 GN=mpv17l PE=2 SV=1	INVnr_XP_001844751.1_conserved_hypothetical_protein_[Culex_quinquefasciatus]
CPIJ004859	growth hormone-inducible transmembrane protein	132.754	1.2676	0.235391	5.38505	7.24e-08	8.21e-07		growth hormone-inducible transmembrane	GHITM_HUMANGrowth hormone-inducible transmembrane OS=Homo sapiens OX=9606 GN=GHITM PE=1 SV=2	INVnr_XP_001846508.1_growth_hormone-inducible_transmembrane_protein_[Culex_quinquefasciatus]
CPIJ005723	conserved hypothetical protein	104.109	1.26595	0.229975	5.50471	3.7e-08	4.48e-07		conserved hypothetical protein	---NA---	INVnr_XP_001847146.1_conserved_hypothetical_protein_[Culex_quinquefasciatus]
CPIJ006079	tryptase gamma precursor	3938.15	1.26584	0.112072	11.2948	1.39e-29	1.82e-27		tryptase gamma	TRY7_ANOGATrypsin-7 OS=Anopheles gambiae OX=7165 GN=TRYP7 PE=2 SV=2	INVnr_XP_001847493.1_tryptase_gamma_[Culex_quinquefasciatus]
CPIJ002330	prefoldin, subunit, putative	106.588	1.26467	0.212821	5.94243	2.81e-09	4.24e-08		probable prefoldin subunit 4	PFD4_DROMEProbable prefoldin subunit 4 OS=Drosophila melanogaster OX=7227 GN=Pfdn4 PE=3 SV=1	INVnr_XP_001843999.1_prefoldin_[Culex_quinquefasciatus]
CPIJ001272	leucine-rich transmembrane protein	92.7224	1.26352	0.251104	5.03186	4.86e-07	4.64e-06		trophoblast glyco	LRRC3_BOVINLeucine-rich repeat-containing 3 OS=Bos taurus OX=9913 GN=LRRC3 PE=2 SV=1	INVnr_XP_001842941.1_leucine-rich_transmembrane_protein_[Culex_quinquefasciatus]
CPIJ004614	solute carrier family 23 member 2	10.4814	1.26301	0.4456	2.83441	0.0045911	0.0150838		solute carrier family 23 member 2	S23A2_XENTRSolute carrier family 23 member 2 OS=Xenopus tropicalis OX=8364 GN=slc23a2 PE=2 SV=1	INVnr_XP_001846149.1_solute_carrier_family_23_member_2_[Culex_quinquefasciatus]
CPIJ014896	conserved hypothetical protein	46.2284	1.26295	0.267158	4.72736	2.27e-06	1.88e-05		ribosomal mitochondrial	RT63_MOUSERibosomal mitochondrial OS=Mus musculus OX=10090 GN=Mrpl57 PE=1 SV=1	INVnr_XP_001864944.1_conserved_hypothetical_protein_[Culex_quinquefasciatus]
CPIJ019233	cerebral protein 1	11.4992	1.26147	0.440429	2.86419	0.00418081	0.0139374		cerebral 1	RRP8_DROMERibosomal RNA-processing 8 OS=Drosophila melanogaster OX=7227 GN=CG7137 PE=1 SV=1	INVnr_XP_001869661.1_cerebral_protein_1_[Culex_quinquefasciatus]
CPIJ003754	conserved hypothetical protein	65.0454	1.26118	0.276228	4.56571	4.98e-06	3.81e-05	cqu04144	rab11 family-interacting 5 isoform X1	RFIP5_HUMANRab11 family-interacting 5 OS=Homo sapiens OX=9606 GN=RAB11FIP5 PE=1 SV=1	INVnr_XP_001845327.1_conserved_hypothetical_protein_[Culex_quinquefasciatus]
CPIJ009822	DNA-directed RNA polymerase III subunit C	7.43474	1.2602	0.491216	2.56546	0.0103039	0.0299177	cqu00230,cqu00240,cqu01100,cqu03020	DNA-directed RNA polymerase III subunit C	RPC3_HUMANDNA-directed RNA polymerase III subunit RPC3 OS=Homo sapiens OX=9606 GN=POLR3C PE=1 SV=1	INVnr_XP_001851545.1_DNA-directed_RNA_polymerase_III_subunit_C_[Culex_quinquefasciatus]
CPIJ002493	cation efflux protein/ zinc transporter	5.7099	1.26009	0.529062	2.38174	0.0172311	0.0462383		zinc transporter 2	ZNT2_MOUSEZinc transporter 2 OS=Mus musculus OX=10090 GN=Slc30a2 PE=1 SV=1	INVnr_XP_001844162.1_cation_efflux_protein/_zinc_transporter_[Culex_quinquefasciatus]
CPIJ008671	zinc-finger protein ZPR1	99.9315	1.25977	0.209092	6.02497	1.69e-09	2.67e-08		zinc-finger ZPR1	ZPR1_HUMANZinc finger ZPR1 OS=Homo sapiens OX=9606 GN=ZPR1 PE=1 SV=1	INVnr_XP_001850239.1_zinc-finger_protein_ZPR1_[Culex_quinquefasciatus]
CPIJ007688	E1a binding protein P400	15.9315	1.25948	0.383953	3.28029	0.00103702	0.00422973		E1a binding P400	DOM_DROMEHelicase domino OS=Drosophila melanogaster OX=7227 GN=dom PE=1 SV=2	INVnr_XP_001849582.1_E1a_binding_protein_P400_[Culex_quinquefasciatus]
CPIJ016541	conserved hypothetical protein	6.41692	1.25615	0.509653	2.46472	0.0137119	0.0379815		F-box LRR-repeat 13-like isoform X2	FXL15_CANLFF-box LRR-repeat 15 OS=Canis lupus familiaris OX=9615 GN=FBXL15 PE=3 SV=1	INVnr_XP_001866650.1_conserved_hypothetical_protein_[Culex_quinquefasciatus]
CPIJ008402	mitochondrial ribosomal protein, L33, putative	37.0968	1.25569	0.289189	4.34212	1.41e-05	9.78e-05	cqu03010	39S ribosomal mitochondrial	RM33_ANOGA39S ribosomal mitochondrial OS=Anopheles gambiae OX=7165 GN=m 33 PE=3 SV=2	INVnr_XP_001849898.1_mitochondrial_ribosomal_protein,_L33_[Culex_quinquefasciatus]
CPIJ011715	translation initiation factor	64.6926	1.25498	0.227922	5.50616	3.67e-08	4.45e-07	cqu03008	translation initiation factor	IF6_DROMEEukaryotic translation initiation factor 6 OS=Drosophila melanogaster OX=7227 GN=eIF6 PE=2 SV=3	INVnr_XP_001862578.1_translation_initiation_factor_[Culex_quinquefasciatus]
CPIJ018326	conserved hypothetical protein	11.6737	1.2539	0.429588	2.91884	0.00351335	0.012029		Niemann-Pick Type C-2	---NA---	INVnr_XP_001868700.1_conserved_hypothetical_protein_[Culex_quinquefasciatus]
CPIJ011255	hypothetical protein	80.5031	1.25318	0.231064	5.42352	5.84e-08	6.73e-07		hypothetical protein CpipJ_CPIJ011255	---NA---	INVnr_XP_001861937.1_hypothetical_protein_CpipJ_CPIJ011255_[Culex_quinquefasciatus]
CPIJ000434	microfibril-associated glycoprotein 4 precursor	25.5562	1.25093	0.35069	3.56706	0.000361004	0.00169528		fibrinogen and fibronectin	ANGL2_MOUSEAngiopoietin-related 2 OS=Mus musculus OX=10090 GN=Angptl2 PE=2 SV=2	INVnr_XP_001842104.1_microfibril-associated_glycoprotein_4_[Culex_quinquefasciatus]
CPIJ009790	conserved hypothetical protein	30.8203	1.25031	0.304195	4.11021	3.95e-05	0.000244466		tetratricopeptide repeat 39B	TT39B_XENTRTetratricopeptide repeat 39B OS=Xenopus tropicalis OX=8364 GN=ttc39b PE=2 SV=1	INVnr_XP_001851338.1_conserved_hypothetical_protein_[Culex_quinquefasciatus]
CPIJ010457	conserved hypothetical protein	8.30604	1.25001	0.470528	2.65662	0.00789294	0.0239131		conserved hypothetical protein	F136A_XENTR FAM136A OS=Xenopus tropicalis OX=8364 GN=fam136a PE=2 SV=1	INVnr_XP_001861591.1_conserved_hypothetical_protein_[Culex_quinquefasciatus]
CPIJ015639	39S ribosomal protein L21, mitochondrial precursor	5.89507	1.24706	0.52167	2.39051	0.0168248	0.0453207	cqu03010	39S ribosomal mitochondrial	RM21_BOVIN39S ribosomal mitochondrial OS=Bos taurus OX=9913 GN=MRPL21 PE=1 SV=1	INVnr_XP_001865900.1_39S_ribosomal_protein_L21,_mitochondrial_[Culex_quinquefasciatus]
CPIJ009056	caspase-3 precursor	19.4893	1.24641	0.356422	3.49701	0.000470506	0.00213822		caspase isoform X2	DRICE_DROMECaspase OS=Drosophila melanogaster OX=7227 GN=Drice PE=1 SV=2	INVnr_XP_001850594.1_caspase-3_[Culex_quinquefasciatus]
CPIJ002084	grb2-associated binder	24.2384	1.24631	0.329673	3.78044	0.000156552	0.000810251	cqu04013	daughter of sevenless	DOS_DROME daughter of sevenless OS=Drosophila melanogaster OX=7227 GN=dos PE=1 SV=1	INVnr_XP_001843352.1_grb2-associated_binder_[Culex_quinquefasciatus]
CPIJ008477	acyl-CoA-binding domain-containing protein 6	35.2226	1.24417	0.282572	4.40303	1.07e-05	7.6e-05		acyl- -binding domain-containing 6	ACBD6_DANREAcyl- -binding domain-containing 6 OS=Danio rerio OX=7955 GN=acbd6 PE=2 SV=1	INVnr_XP_001850076.1_acyl-CoA-binding_domain-containing_protein_6_[Culex_quinquefasciatus]
CPIJ010052	ankyrin repeat domain-containing protein 44	33.0694	1.24111	0.306845	4.04473	5.24e-05	0.00031191		ankyrin repeat domain-containing 44	WARA_DICDIHomeobox Wariai OS=Dictyostelium discoideum OX=44689 GN=warA PE=2 SV=1	INVnr_XP_001851565.1_ankyrin_repeat_domain-containing_protein_44_[Culex_quinquefasciatus]
CPIJ002532	sodium-dependent multivitamin transporter	10.0717	1.24019	0.453212	2.73644	0.00621072	0.0194696		sodium-dependent multivitamin transporter	SC5A8_HUMANSodium-coupled monocarboxylate transporter 1 OS=Homo sapiens OX=9606 GN=SLC5A8 PE=1 SV=2	INVnr_XP_001844201.1_sodium-dependent_multivitamin_transporter_[Culex_quinquefasciatus]
CPIJ000716	ion channel nompc	19.3801	1.24017	0.360638	3.43883	0.000584237	0.00257694		ion channel	Y381_RICFE ankyrin repeat RF_0381 OS=Rickettsia felis (strain ATCC VR-1525 URRWXCal2) OX=315456 GN=RF_0381 PE=4 SV=1	INVnr_XP_001842281.1_ion_channel_nompc,_partial_[Culex_quinquefasciatus]
CPIJ006716	peptidoglycan recognition protein sb2	8.67283	1.23945	0.474888	2.60999	0.00905459	0.0268975		peptidoglycan recognition sb2	PGPLB_DROMEPeptidoglycan-recognition LB OS=Drosophila melanogaster OX=7227 GN=PGRP-LB PE=1 SV=1	INVnr_XP_001849091.1_peptidoglycan_recognition_protein_sb2_[Culex_quinquefasciatus]
CPIJ004671	ATP synthase mitochondrial F1 complex assembly factor 2	26.0649	1.23757	0.317236	3.90109	9.58e-05	0.000529876		ATP synthase mitochondrial F1 complex assembly factor 2	ATPF2_BOVINATP synthase mitochondrial F1 complex assembly factor 2 OS=Bos taurus OX=9913 GN=ATPAF2 PE=2 SV=1	INVnr_XP_001846232.1_ATP_synthase_mitochondrial_F1_complex_assembly_factor_2_[Culex_quinquefasciatus]
CPIJ016353	elongase, putative	9.76169	1.23562	0.446222	2.76906	0.00562184	0.0178782		elongation of very long chain fatty acids 4-like	ELOV4_HUMANElongation of very long chain fatty acids 4 OS=Homo sapiens OX=9606 GN=ELOVL4 PE=1 SV=1	INVnr_XP_001866629.1_elongase_[Culex_quinquefasciatus]
CPIJ009046	proliferating cell nuclear antigen	41.3076	1.23495	0.272717	4.52832	5.95e-06	4.48e-05	cqu03030,cqu03410,cqu03420,cqu03430	proliferating cell nuclear antigen	PCNA_DROMEProliferating cell nuclear antigen OS=Drosophila melanogaster OX=7227 GN=PCNA PE=1 SV=2	INVnr_XP_001850584.1_proliferating_cell_nuclear_antigen_[Culex_quinquefasciatus]
CPIJ003204	DNAJ chaperone	668.655	1.2348	0.158926	7.76969	7.87e-15	2.73e-13	cqu04141	DNAJ chaperone	DNJA1_HUMAN homolog subfamily A member 1 OS=Homo sapiens OX=9606 GN=DNAJA1 PE=1 SV=2	INVnr_XP_001844792.1_DNAJ_chaperone_[Culex_quinquefasciatus]
CPIJ017118	conserved hypothetical protein	22.7985	1.23272	0.352491	3.49717	0.000470219	0.00213822		conserved hypothetical protein	---NA---	INVnr_XP_001867422.1_conserved_hypothetical_protein_[Culex_quinquefasciatus]
CPIJ010586	transcription elongation factor SPT4	13.1227	1.23189	0.417075	2.95364	0.00314053	0.0109406		transcription elongation factor SPT4	SPT4H_DROMETranscription elongation factor SPT4 OS=Drosophila melanogaster OX=7227 GN=spt4 PE=1 SV=1	INVnr_XP_001870822.1_transcription_elongation_factor_SPT4_[Culex_quinquefasciatus]
CPIJ003659	peptidyl-tRNA hydrolase 2, mitochondrial precursor	25.1948	1.23137	0.322477	3.81846	0.000134287	0.000713361		peptidyl-tRNA hydrolase mitochondrial	PTH2_DROMEProbable peptidyl-tRNA hydrolase 2 OS=Drosophila melanogaster OX=7227 GN=CG1307 PE=2 SV=2	INVnr_XP_001845438.1_peptidyl-tRNA_hydrolase_2,_mitochondrial_[Culex_quinquefasciatus]
CPIJ002299	conserved hypothetical protein	53.2019	1.23119	0.248237	4.95974	7.06e-07	6.51e-06		zinc finger 706	ZN706_CHICKZinc finger 706 OS=Gallus gallus OX=9031 GN=ZNF706 PE=3 SV=1	INVnr_XP_001843968.1_conserved_hypothetical_protein_[Culex_quinquefasciatus]
CPIJ013673	39S ribosomal protein L11, mitochondrial precursor	20.8046	1.22906	0.346292	3.54919	0.000386421	0.00180023	cqu03010	39S ribosomal mitochondrial	RM11_DROME39S ribosomal mitochondrial OS=Drosophila melanogaster OX=7227 GN=m 11 PE=1 SV=1	INVnr_XP_001863766.1_39S_ribosomal_protein_L11,_mitochondrial_[Culex_quinquefasciatus]
CPIJ003279	tryptophanyl-tRNA synthetase	243.702	1.2286	0.217514	5.64839	1.62e-08	2.14e-07	cqu00970	tryptophanyl-tRNA synthetase	SYWC_HUMANTryptophan--tRNA cytoplasmic OS=Homo sapiens OX=9606 GN=WARS PE=1 SV=2	INVnr_XP_001845005.1_tryptophanyl-tRNA_synthetase_[Culex_quinquefasciatus]
CPIJ002133	trypsin epsilon precursor	300.058	1.22632	0.158937	7.71577	1.2e-14	4.03e-13		trypsin epsilon	CTRB1_LITVAChymotrypsin BI OS=Litopenaeus vannamei OX=6689 PE=1 SV=1	INVnr_XP_001843401.1_trypsin_epsilon_[Culex_quinquefasciatus]
CPIJ000318	cytochrome b5, putative	19.9363	1.22542	0.359335	3.41025	0.000649038	0.00282735		cytochrome b5	CYB5_MUSDOCytochrome b5 OS=Musca domestica OX=7370 GN=Cyt-b5 PE=1 SV=1	INVnr_XP_001841891.1_cytochrome_b5_[Culex_quinquefasciatus]
CPIJ010413	mitochondrial import inner membrane translocase subunit Tim23	61.4205	1.21853	0.23734	5.13413	2.83e-07	2.84e-06		mitochondrial import inner membrane translocase subunit Tim23	TIM23_PONABMitochondrial import inner membrane translocase subunit Tim23 OS=Pongo abelii OX=9601 GN=TIMM23 PE=2 SV=1	INVnr_XP_001870925.1_mitochondrial_import_inner_membrane_translocase_subunit_Tim23_[Culex_quinquefasciatus]
CPIJ012815	mannose-1-phosphate guanyltransferase	51.2678	1.21797	0.271193	4.49116	7.08e-06	5.22e-05	cqu00051,cqu00520,cqu01100	mannose-1-phosphate guanyltransferase	GMPPB_DROPSMannose-1-phosphate guanyltransferase beta OS=Drosophila pseudoobscura pseudoobscura OX=46245 GN=GA10892 PE=3 SV=1	INVnr_XP_001863315.1_mannose-1-phosphate_guanyltransferase_[Culex_quinquefasciatus]
CPIJ009270	conserved hypothetical protein	12.074	1.2171	0.427119	2.84955	0.00437812	0.0144786		galactosylgalactosylxylosyl 3-beta-glucuronosyltransferase S-like	B3G2S_DROMEGalactosylgalactosylxylosyl 3-beta-glucuronosyltransferase S OS=Drosophila melanogaster OX=7227 GN= -S PE=1 SV=2	INVnr_XP_001850735.1_conserved_hypothetical_protein_[Culex_quinquefasciatus]
CPIJ009389	p21-activated protein kinase-interacting protein 1	15.4715	1.21492	0.394095	3.08281	0.00205058	0.00761428		p21-activated kinase-interacting 1-like	PK1IP_XENLAp21-activated kinase-interacting 1-like OS=Xenopus laevis OX=8355 GN=pak1ip1 PE=2 SV=1	INVnr_XP_001850983.1_p21-activated_protein_kinase-interacting_protein_1_[Culex_quinquefasciatus]
CPIJ000031	glutathione S-transferase	162.168	1.21394	0.170604	7.11554	1.11e-12	2.88e-11	cqu00480,cqu00790	glutathione S-transferase	SEPIA_DROMEPyrimidodiazepine synthase OS=Drosophila melanogaster OX=7227 GN=se PE=1 SV=1	INVnr_XP_001841701.1_glutathione_S-transferase_[Culex_quinquefasciatus]
CPIJ003538	conserved hypothetical protein	14.9684	1.21171	0.388097	3.12219	0.00179511	0.00678731		conserved hypothetical protein	---NA---	INVnr_XP_001845178.1_conserved_hypothetical_protein_[Culex_quinquefasciatus]
CPIJ008309	para-hydroxybenzoate-polyprenyltransferase, mitochondrial precursor	49.2839	1.21165	0.261255	4.6378	3.52e-06	2.76e-05	cqu00130,cqu01100	para-hydroxybenzoate- mitochondrial	COQ2_AEDAE4-hydroxybenzoate mitochondrial OS=Aedes aegypti OX=7159 GN=coq2 PE=3 SV=1	INVnr_XP_001849425.1_para-hydroxybenzoate-polyprenyltransferase,_mitochondrial_[Culex_quinquefasciatus]
CPIJ009916	brix domain-containing protein 2	13.6895	1.21114	0.405412	2.98744	0.00281324	0.00994803		brix domain-containing 2	BRX1_DROMERibosome biogenesis BRX1 homolog OS=Drosophila melanogaster OX=7227 GN=CG11583 PE=2 SV=2	INVnr_XP_001862861.1_brix_domain-containing_protein_2_[Culex_quinquefasciatus]
CPIJ010828	conserved hypothetical protein	224.978	1.21001	0.168558	7.17862	7.04e-13	1.88e-11		ceramide-1-phosphate transfer -like	CPTP_XENLACeramide-1-phosphate transfer OS=Xenopus laevis OX=8355 GN=cptp PE=2 SV=1	INVnr_XP_001861323.1_conserved_hypothetical_protein_[Culex_quinquefasciatus]
CPIJ008876	lysosomal pro-X carboxypeptidase, putative	4559.13	1.20974	0.133645	9.05186	1.41e-19	8.42e-18		serine protease	YM67_CAEEL serine protease OS=Caenorhabditis elegans OX=6239 GN= PE=3 SV=2	INVnr_XP_001850488.1_lysosomal_pro-X_carboxypeptidase_[Culex_quinquefasciatus]
CPIJ015132	conserved hypothetical protein	19.388	1.20956	0.357998	3.37867	0.000728375	0.00313995	cqu03013	ribonuclease P subunit p14	RPP14_MOUSERibonuclease P subunit p14 OS=Mus musculus OX=10090 GN=Rpp14 PE=1 SV=1	INVnr_XP_001865318.1_conserved_hypothetical_protein_[Culex_quinquefasciatus]
CPIJ003826	serine proteases 1/2 precursor	3218.75	1.20796	0.104556	11.5533	7.11e-31	1.04e-28		serine protease1 2	COGS_HYPLICollagenase OS=Hypoderma lineatum OX=7389 PE=1 SV=3	INVnr_XP_001845462.1_serine_protease1/2_[Culex_quinquefasciatus]
CPIJ009694	tRNA	12.0324	1.20326	0.419355	2.86931	0.00411372	0.0137528		tRNA methyltransferase	TRMB_CULQ (guanine-N(7)-)-methyltransferase OS=Culex quinquefasciatus OX=7176 GN=CPIJ009694 PE=3 SV=1	INVnr_XP_001851677.1_tRNA_methyltransferase_[Culex_quinquefasciatus]
CPIJ008530	lactase-phlorizin hydrolase precursor	1085.73	1.2025	0.12406	9.69287	3.23e-22	2.56e-20		lactase-phlorizin hydrolase	MYRO1_BREBRMyrosinase 1 OS=Brevicoryne brassicae OX=69196 PE=1 SV=1	INVnr_XP_001850319.1_lactase-phlorizin_hydrolase_[Culex_quinquefasciatus]
CPIJ013088	conserved hypothetical protein	12.9294	1.19988	0.408279	2.93886	0.00329417	0.0114062		FAM206 family CG9288-like	F206_DROMEFAM206 family CG9288 OS=Drosophila melanogaster OX=7227 GN=CG9288 PE=2 SV=1	INVnr_XP_001863390.1_conserved_hypothetical_protein_[Culex_quinquefasciatus]
CPIJ009186	complement component	103.856	1.19286	0.197878	6.02825	1.66e-09	2.62e-08		complement component	C1QBP_BOVINComplement component 1 Q subcomponent-binding mitochondrial OS=Bos taurus OX=9913 GN=C1QBP PE=2 SV=1	INVnr_XP_001850674.1_complement_component_[Culex_quinquefasciatus]
CPIJ018687	mitochondrial import inner membrane translocase subunit Tim9	45.0948	1.19166	0.269325	4.4246	9.66e-06	6.92e-05		mitochondrial import inner membrane translocase subunit Tim9	TIM9_DROMEMitochondrial import inner membrane translocase subunit Tim9 OS=Drosophila melanogaster OX=7227 GN=Tim9a PE=3 SV=1	INVnr_XP_001868839.1_mitochondrial_import_inner_membrane_translocase_subunit_Tim9_[Culex_quinquefasciatus]
CPIJ016326	conserved hypothetical protein	109.418	1.18985	0.407908	2.91695	0.0035347	0.0120866		flexible cuticle 12	CU12_HYACEFlexible cuticle 12 OS=Hyalophora cecropia OX=7123 GN=CP12 PE=2 SV=1	INVnr_XP_001866507.1_conserved_hypothetical_protein_[Culex_quinquefasciatus]
CPIJ000770	trypsin precursor	5876.73	1.18867	0.104542	11.3702	5.89e-30	8.13e-28		trypsin	PRS27_RATSerine protease 27 OS=Rattus norvegicus OX=10116 GN=Prss27 PE=2 SV=1	INVnr_XP_001842576.1_trypsin_[Culex_quinquefasciatus]
CPIJ015971	26S proteasome non-ATPase regulatory subunit 11	71.1589	1.18702	0.241659	4.91196	9.02e-07	8.11e-06	cqu03050	26S proteasome non-ATPase regulatory subunit 11	PSD11_DROME26S proteasome non-ATPase regulatory subunit 11 OS=Drosophila melanogaster OX=7227 GN=Rpn6 PE=1 SV=1	INVnr_XP_001866360.1_26S_proteasome_non-ATPase_regulatory_subunit_11_[Culex_quinquefasciatus]
CPIJ000131	conserved hypothetical protein	18.829	1.18652	0.365693	3.24458	0.00117624	0.00472106		lysM and peptidoglycan-binding domain-containing 3	LYSM3_HUMAN and peptidoglycan-binding domain-containing 3 OS=Homo sapiens OX=9606 GN=LYSMD3 PE=1 SV=2	INVnr_XP_001841801.1_conserved_hypothetical_protein_[Culex_quinquefasciatus]
CPIJ005012	conserved hypothetical protein	65.8176	1.18553	0.479265	2.47363	0.0133748	0.0372221		conserved hypothetical protein	FA98B_MOUSE FAM98B OS=Mus musculus OX=10090 GN=Fam98b PE=1 SV=1	INVnr_XP_001846653.1_conserved_hypothetical_protein_[Culex_quinquefasciatus]
CPIJ018211	mitochondrial inner membrane protein translocase, 13kD-subunit, putative	58.4879	1.1833	0.234819	5.03921	4.67e-07	4.48e-06		mitochondrial import inner membrane translocase subunit Tim13	TIM13_DROMEMitochondrial import inner membrane translocase subunit Tim13 OS=Drosophila melanogaster OX=7227 GN=Tim13 PE=3 SV=1	INVnr_XP_001868540.1_mitochondrial_inner_membrane_protein_translocase,_13kD-subunit_[Culex_quinquefasciatus]
CPIJ010707		20.6757	1.1817	0.356277	3.3168	0.00091056	0.00377707		clumping factor B-like isoform X4	---NA---	INVnr_XP_001861748.1_conserved_hypothetical_protein_[Culex_quinquefasciatus]
CPIJ009942	density-regulated protein	25.7832	1.18109	0.319309	3.69889	0.000216548	0.001078		density-regulated homolog	DENR_DROMEDensity-regulated homolog OS=Drosophila melanogaster OX=7227 GN=DENR PE=1 SV=3	INVnr_XP_001870739.1_density-regulated_protein_[Culex_quinquefasciatus]
CPIJ005705	ATP-binding cassette sub-family F member 1	134.885	1.18092	0.209867	5.62699	1.83e-08	2.4e-07		---NA---	ABCF1_RATATP-binding cassette sub-family F member 1 OS=Rattus norvegicus OX=10116 GN=Abcf1 PE=1 SV=1	INVnr_XP_001847128.1_ATP-binding_cassette_sub-family_F_member_1_[Culex_quinquefasciatus]
CPIJ019271	conserved hypothetical protein	200.204	1.18059	0.169934	6.94734	3.72e-12	8.77e-11		arginine kinase isoform X2	KARG_PLOINArginine kinase OS=Plodia interpunctella OX=58824 GN=ARGK PE=1 SV=1	INVnr_XP_001870075.1_conserved_hypothetical_protein_[Culex_quinquefasciatus]
CPIJ009819	hypothetical protein	8.51247	1.17894	0.466583	2.52675	0.0115122	0.032747		gamma-aminobutyric acid receptor subunit alpha-6	---NA---	INVnr_XP_001870767.1_hypothetical_protein_CpipJ_CPIJ009819_[Culex_quinquefasciatus]
CPIJ010271	conserved hypothetical protein	44.7839	1.17855	0.266331	4.42514	9.64e-06	6.91e-05		zinc finger 622-like	ZN622_HUMANZinc finger 622 OS=Homo sapiens OX=9606 GN=ZNF622 PE=1 SV=1	INVnr_XP_001870854.1_conserved_hypothetical_protein_[Culex_quinquefasciatus]
CPIJ004400	ornithine aminotransferase, mitochondrial precursor	146.647	1.17756	0.219549	5.36354	8.16e-08	9.15e-07	cqu00330,cqu01100	ornithine mitochondrial	OAT_DROMEOrnithine mitochondrial OS=Drosophila melanogaster OX=7227 GN=Oat PE=2 SV=1	INVnr_XP_001845986.1_ornithine_aminotransferase,_mitochondrial_[Culex_quinquefasciatus]
CPIJ002850	cgi-51-prov protein	34.3477	1.17709	0.284685	4.13472	3.55e-05	0.000221539		SAM50 CG7639	SAM50_DROMESAM50 CG7639 OS=Drosophila melanogaster OX=7227 GN=CG7639 PE=2 SV=2	INVnr_XP_001844381.1_cgi-51-prov_protein_[Culex_quinquefasciatus]
CPIJ014672	conserved hypothetical protein	354.658	1.17414	0.144299	8.13683	4.06e-16	1.61e-14		alpha-tocopherol transfer -like	PINTA_DROMERetinol-binding pinta OS=Drosophila melanogaster OX=7227 GN=pinta PE=2 SV=1	INVnr_XP_001865347.1_conserved_hypothetical_protein_[Culex_quinquefasciatus]
CPIJ007774	conserved hypothetical protein	15.4033	1.17267	0.385902	3.03879	0.00237534	0.00862174		ankyrin repeat domain-containing 27 isoform X1	ANR27_PONABAnkyrin repeat domain-containing 27 OS=Pongo abelii OX=9601 GN=ANKRD27 PE=2 SV=1	INVnr_XP_001849277.1_conserved_hypothetical_protein_[Culex_quinquefasciatus]
CPIJ002918	eukaryotic translation initiation factor 4 gamma	127.019	1.1722	0.20864	5.61826	1.93e-08	2.5e-07	cqu03013	eukaryotic translation initiation factor 4 gamma 2	IF4G2_PONABEukaryotic translation initiation factor 4 gamma 2 OS=Pongo abelii OX=9601 GN=EIF4G2 PE=2 SV=2	INVnr_XP_001844536.1_eukaryotic_translation_initiation_factor_4_gamma_[Culex_quinquefasciatus]
CPIJ008935	39S ribosomal protein L17, mitochondrial precursor	25.1928	1.17174	0.319996	3.66173	0.000250515	0.00123056	cqu03010	39S ribosomal mitochondrial	RM17_HUMAN39S ribosomal mitochondrial OS=Homo sapiens OX=9606 GN=MRPL17 PE=1 SV=1	INVnr_XP_001851021.1_39S_ribosomal_protein_L17,_mitochondrial_[Culex_quinquefasciatus]
CPIJ009679	peroxiredoxin-2	73.2731	1.17086	0.219154	5.34263	9.16e-08	1.01e-06		peroxiredoxin-2	PRDX3_PONABThioredoxin-dependent peroxide mitochondrial OS=Pongo abelii OX=9601 GN=PRDX3 PE=2 SV=1	INVnr_XP_001852614.1_peroxiredoxin-2_[Culex_quinquefasciatus]
CPIJ016151	conserved hypothetical protein	43.425	1.16847	0.269296	4.339	1.43e-05	9.91e-05		conserved hypothetical protein	TG325_CAEELWW domain-containing tag-325 OS=Caenorhabditis elegans OX=6239 GN=tag-325 PE=4 SV=1	INVnr_XP_001867013.1_conserved_hypothetical_protein_[Culex_quinquefasciatus]
CPIJ013127	conserved hypothetical protein	10.7634	1.16776	0.433747	2.69225	0.00709723	0.0218979		short coiled-coil homolog	SCOC_BRUMAShort coiled-coil homolog OS=Brugia malayi OX=6279 GN=Bm1_04115 PE=3 SV=1	INVnr_XP_001863448.1_conserved_hypothetical_protein_[Culex_quinquefasciatus]
CPIJ016781	conserved hypothetical protein	11.3441	1.16716	0.447207	2.60988	0.00905748	0.0268975		H ACA ribonucleo complex non-core subunit NAF1	NAF1_DROMEH ACA ribonucleo complex non-core subunit NAF1 OS=Drosophila melanogaster OX=7227 GN=CG10341 PE=1 SV=2	INVnr_XP_001867727.1_conserved_hypothetical_protein_[Culex_quinquefasciatus]
CPIJ003560	conserved hypothetical protein	40.2229	1.16583	0.270758	4.30583	1.66e-05	0.000112788		programmed cell death 7 isoform X1	---NA---	INVnr_XP_001845228.1_conserved_hypothetical_protein_[Culex_quinquefasciatus]
CPIJ016789	zinc finger protein	12.0991	1.16543	0.434659	2.68126	0.00733454	0.0225125		zinc finger	ZN271_MOUSEZinc finger 271 OS=Mus musculus OX=10090 GN=Znf271 PE=2 SV=1	INVnr_XP_001866945.1_zinc_finger_protein_[Culex_quinquefasciatus]
CPIJ015157	Lsm6 protein	22.4652	1.16478	0.33884	3.43754	0.000587014	0.00258595	cqu03018,cqu03040	U6 snRNA-associated Sm LSm6	LSM6_MOUSEU6 snRNA-associated Sm LSm6 OS=Mus musculus OX=10090 GN=Lsm6 PE=1 SV=1	INVnr_XP_013112899.1_PREDICTED:_U6_snRNA-associated_Sm-like_protein_LSm6_[Stomoxys_calcitrans]
CPIJ005186	organic anion transporter, putative	60.4576	1.1645	0.273732	4.25418	2.1e-05	0.000137995		organic anion transporter	SO3A1_BOVINSolute carrier organic anion transporter family member 3A1 OS=Bos taurus OX=9913 GN=SLCO3A1 PE=2 SV=1	INVnr_XP_001847079.1_organic_anion_transporter_[Culex_quinquefasciatus]
CPIJ004060	aminopeptidase N precursor	1820.15	1.16366	0.126821	9.17564	4.49e-20	2.9e-18		aminopeptidase N	AMPN_PLUXYAminopeptidase N OS=Plutella xylostella OX=51655 GN=APN1 PE=1 SV=1	INVnr_XP_001845690.1_aminopeptidase_N_[Culex_quinquefasciatus]
CPIJ004798	troponin C	38.34	1.16293	0.276117	4.21174	2.53e-05	0.000163464		troponin C	TNNC_TACTRTroponin C OS=Tachypleus tridentatus OX=6853 PE=1 SV=1	INVnr_XP_001846408.1_troponin_C_[Culex_quinquefasciatus]
CPIJ013934	xanthine dehydrogenase/oxidase	37.909	1.1613	0.296987	3.91026	9.22e-05	0.000511361	cqu00230,cqu00232,cqu00983,cqu01100,cqu04146	xanthine dehydrogenase oxidase	XDH_RATXanthine dehydrogenase oxidase OS=Rattus norvegicus OX=10116 GN=Xdh PE=1 SV=3	INVnr_XP_001864348.1_xanthine_dehydrogenase/oxidase_[Culex_quinquefasciatus]
CPIJ000373	conserved hypothetical protein	68.7397	1.15854	0.225394	5.14008	2.75e-07	2.76e-06	cqu04137	FUN14 domain-containing 1-like isoform X1	FUND1_DANREFUN14 domain-containing 1 OS=Danio rerio OX=7955 GN=fundc1 PE=2 SV=2	INVnr_XP_001842043.1_conserved_hypothetical_protein_[Culex_quinquefasciatus]
CPIJ008097	conserved hypothetical protein	51.2195	1.15806	0.25405	4.5584	5.15e-06	3.94e-05		C19orf12 homolog	---NA---	INVnr_XP_001849829.1_conserved_hypothetical_protein_[Culex_quinquefasciatus]
CPIJ011727	translocon-associated protein subunit gamma	268.773	1.15718	0.151248	7.65089	2e-14	6.51e-13	cqu04141	translocon-associated subunit gamma	SSRG_HUMANTranslocon-associated subunit gamma OS=Homo sapiens OX=9606 GN=SSR3 PE=1 SV=1	INVnr_XP_001862084.1_translocon-associated_protein_subunit_gamma_[Culex_quinquefasciatus]
CPIJ003120	hypothetical protein	168.415	1.15712	0.180813	6.39958	1.56e-10	2.84e-09		---NA---	---NA---	NA
CPIJ005272	trypsin 3A1 precursor	35.6129	1.15664	0.34028	3.39909	0.000676094	0.00292891		trypsin 2	TRY3_AEDAETrypsin 3A1 OS=Aedes aegypti OX=7159 GN=AAEL007818 PE=2 SV=2	INVnr_XP_001847027.1_trypsin_3A1_[Culex_quinquefasciatus]
CPIJ012069	sucrose transport protein	37.1917	1.15633	0.295495	3.9132	9.11e-05	0.000506012		sucrose transport	S45A2_MOUSEMembrane-associated transporter OS=Mus musculus OX=10090 GN=Slc45a2 PE=1 SV=1	INVnr_XP_001862448.1_sucrose_transport_protein_[Culex_quinquefasciatus]
CPIJ002182	conserved hypothetical protein	45.7464	1.15491	0.259307	4.45383	8.44e-06	6.13e-05		reactive oxygen species modulator 1	ROMO1_DANREReactive oxygen species modulator 1 OS=Danio rerio OX=7955 GN=romo1 PE=3 SV=1	INVnr_XP_001843850.1_conserved_hypothetical_protein_[Culex_quinquefasciatus]
CPIJ002043	translocon-associated protein, delta subunit	14.4315	1.1548	0.391535	2.94942	0.00318366	0.011069	cqu04141	translocon-associated delta subunit	SSRD_PONABTranslocon-associated subunit delta OS=Pongo abelii OX=9601 GN=SSR4 PE=2 SV=2	INVnr_XP_001843582.1_translocon-associated_protein,_delta_subunit_[Culex_quinquefasciatus]
CPIJ000767	hypothetical protein	101.219	1.15393	0.198057	5.82624	5.67e-09	8.12e-08		hypothetical protein CpipJ_CPIJ000767	---NA---	INVnr_XP_001842573.1_hypothetical_protein_CpipJ_CPIJ000767_[Culex_quinquefasciatus]
CPIJ009344	conserved hypothetical protein	13.1965	1.15341	0.40504	2.84765	0.00440436	0.0145313		transmembrane 186	TM186_HUMANTransmembrane 186 OS=Homo sapiens OX=9606 GN=TMEM186 PE=2 SV=1	INVnr_XP_001851269.1_conserved_hypothetical_protein_[Culex_quinquefasciatus]
CPIJ004697	conserved hypothetical protein	28.485	1.15312	0.311155	3.70593	0.000210614	0.00105517		conserved hypothetical protein	---NA---	INVnr_XP_001846258.1_conserved_hypothetical_protein_[Culex_quinquefasciatus]
CPIJ007628	Juvenile hormone-inducible protein, putative	145.924	1.15029	0.182818	6.29201	3.13e-10	5.45e-09		Juvenile hormone-inducible	---NA---	INVnr_XP_001848858.1_Juvenile_hormone-inducible_protein_[Culex_quinquefasciatus]
CPIJ013871	hypothetical protein	61.8204	1.14764	0.229449	5.00171	5.68e-07	5.34e-06		hypothetical protein CpipJ_CPIJ013871	---NA---	INVnr_XP_001864114.1_hypothetical_protein_CpipJ_CPIJ013871_[Culex_quinquefasciatus]
CPIJ004778	ER protein reticulon	96.8073	1.14761	0.199211	5.7608	8.37e-09	1.17e-07		ER reticulon	RTN1A_XENLAReticulon-1-A OS=Xenopus laevis OX=8355 GN=rtn1-a PE=2 SV=1	INVnr_XP_001846388.1_ER_protein_reticulon_[Culex_quinquefasciatus]
CPIJ018693	hyp37.3 putative secreted salivary gland protein	34.1708	1.14717	0.316832	3.62074	0.000293765	0.00141635		secreted salivary gland	---NA---	INVnr_XP_001868942.1_hyp37.3_putative_secreted_salivary_gland_protein_[Culex_quinquefasciatus]
CPIJ001131	erythrocyte band 7 integral membrane protein	25.3886	1.14674	0.319071	3.594	0.000325644	0.00154689		stomatin mitochondrial	STML2_MOUSEStomatin mitochondrial OS=Mus musculus OX=10090 GN=Stoml2 PE=1 SV=1	INVnr_XP_001842800.1_erythrocyte_band_7_integral_membrane_protein_[Culex_quinquefasciatus]
CPIJ000729	mitochondrial ribosomal protein, L17, putative	25.896	1.14428	0.319814	3.57795	0.000346303	0.00163277	cqu03010	mitochondrial ribosomal L17	RM18_MOUSE39S ribosomal mitochondrial OS=Mus musculus OX=10090 GN=Mrpl18 PE=1 SV=1	INVnr_XP_001842294.1_mitochondrial_ribosomal_protein,_L17_[Culex_quinquefasciatus]
CPIJ016640	inositol monophosphatase	44.6448	1.14076	0.260185	4.38444	1.16e-05	8.21e-05	cqu00562,cqu01100,cqu04070	inositol monophosphatase	IMPA1_PONABInositol monophosphatase 1 OS=Pongo abelii OX=9601 GN=IMPA1 PE=2 SV=1	INVnr_XP_001866808.1_inositol_monophosphatase_[Culex_quinquefasciatus]
CPIJ015801	mitogen activated protein kinase kinase 2, mapkk2, mek2	14.8857	1.13673	0.404759	2.80842	0.00497847	0.016168	cqu04013,cqu04068,cqu04140,cqu04150,cqu04320	dual specificity mitogen-activated kinase kinase dSOR1	DSOR1_DROMEDual specificity mitogen-activated kinase kinase dSOR1 OS=Drosophila melanogaster OX=7227 GN=Dsor1 PE=1 SV=2	INVnr_XP_001866069.1_mitogen_activated_protein_kinase_kinase_2_[Culex_quinquefasciatus]
CPIJ012795	arp2/3 complex 16 kd subunit	134.07	1.13628	0.185876	6.11312	9.77e-10	1.6e-08	cqu04144	actin-related 2 3 complex subunit 5	ARPC5_RATActin-related 2 3 complex subunit 5 OS=Rattus norvegicus OX=10116 GN=Arpc5 PE=1 SV=3	INVnr_XP_001862975.1_arp2/3_complex_16_kd_subunit_[Culex_quinquefasciatus]
CPIJ003678	U3 small nucleolar ribonucleoprotein protein IMP4	13.6934	1.1341	0.403393	2.81139	0.00493279	0.0160344	cqu03008	U3 small nucleolar ribonucleo IMP4	IMP4_RATU3 small nucleolar ribonucleo IMP4 OS=Rattus norvegicus OX=10116 GN=Imp4 PE=2 SV=1	INVnr_XP_001845456.1_U3_small_nucleolar_ribonucleoprotein_protein_IMP4_[Culex_quinquefasciatus]
CPIJ005219	protein disulfide isomerase	464.17	1.13404	0.1699	6.67474	2.48e-11	5.18e-10	cqu04141	disulfide isomerase	PDI_DROME disulfide-isomerase OS=Drosophila melanogaster OX=7227 GN=Pdi PE=2 SV=1	INVnr_XP_001847538.1_disulfide_isomerase_[Culex_quinquefasciatus]
CPIJ006543	urokinase-type plasminogen activator precursor	113.945	1.13154	0.39721	2.84871	0.00438966	0.014503		urokinase-type plasminogen activator	CTR1_SOLINChymotrypsin-1 OS=Solenopsis invicta OX=13686 PE=1 SV=1	INVnr_XP_001848040.1_urokinase-type_plasminogen_activator_[Culex_quinquefasciatus]
CPIJ000746	hypothetical protein	140.233	1.13085	0.216511	5.22305	1.76e-07	1.83e-06		isoform A	---NA---	INVnr_XP_001842311.1_hypothetical_protein_CpipJ_CPIJ000746_[Culex_quinquefasciatus]
CPIJ010526	cysteinyl-tRNA synthetase	63.1561	1.12893	0.264844	4.26262	2.02e-05	0.000133381	cqu00970	cysteinyl-tRNA synthetase	SYCC_DROPSCysteine--tRNA cytoplasmic OS=Drosophila pseudoobscura pseudoobscura OX=46245 GN=Aats-cys PE=3 SV=1	INVnr_XP_001855148.1_cysteinyl-tRNA_synthetase_[Culex_quinquefasciatus]
CPIJ016873	Gr15: gustatory receptor Gr15	8.11948	1.12822	0.473436	2.38304	0.0171702	0.0461278		Gustatory receptor 64f	GR64A_DROMEGustatory receptor for sugar taste 64a OS=Drosophila melanogaster OX=7227 GN=Gr64a PE=2 SV=1	INVnr_XP_001866970.1_Gustatory_receptor_64f_[Culex_quinquefasciatus]
CPIJ011924	conserved hypothetical protein	742.534	1.1255	0.127041	8.85937	8.05e-19	4.43e-17		farnesoic acid O-methyl transferase	---NA---	INVnr_XP_001862137.1_conserved_hypothetical_protein_[Culex_quinquefasciatus]
CPIJ007480	transmembrane emp24 domain-containing protein 9 precursor	131.434	1.12447	0.17727	6.34325	2.25e-10	4.03e-09		transmembrane emp24 domain-containing 9	TMEDE_DROWITransmembrane emp24 domain-containing eca OS=Drosophila willistoni OX=7260 GN=eca PE=3 SV=1	INVnr_XP_001848650.1_transmembrane_emp24_domain-containing_protein_9_[Culex_quinquefasciatus]
CPIJ009416	ubiquitin-activating enzyme E1 domain-containing protein 1	50.3659	1.12435	0.248157	4.53081	5.88e-06	4.45e-05		ubiquitin-like modifier-activating enzyme 5	UBA5_CULQUUbiquitin-like modifier-activating enzyme 5 OS=Culex quinquefasciatus OX=7176 GN=CPIJ009416 PE=3 SV=1	INVnr_XP_001851085.1_ubiquitin-activating_enzyme_E1_domain-containing_protein_1_[Culex_quinquefasciatus]
CPIJ008190	39S ribosomal protein L14, mitochondrial precursor	42.9269	1.12192	0.277253	4.04656	5.2e-05	0.000309746	cqu03010	39S ribosomal mitochondrial	RM14_DANRE39S ribosomal mitochondrial OS=Danio rerio OX=7955 GN=mrpl14 PE=2 SV=1	INVnr_XP_001849440.1_39S_ribosomal_protein_L14,_mitochondrial_[Culex_quinquefasciatus]
CPIJ004362	lethal 87Df	36.4996	1.11933	0.29273	3.82375	0.000131436	0.0006998		cytochrome c oxidase 20 homolog	COX20_HUMANCytochrome c oxidase assembly mitochondrial OS=Homo sapiens OX=9606 GN=COX20 PE=1 SV=2	INVnr_XP_001846121.1_lethal_87Df_[Culex_quinquefasciatus]
CPIJ013047	predicted protein	17.9101	1.11929	0.36316	3.08209	0.00205555	0.00762872		keratinocyte lectin	---NA---	INVnr_XP_001863477.1_predicted_protein_[Culex_quinquefasciatus]
CPIJ017383	tubulin alpha-1 chain	787.446	1.11536	0.172946	6.44918	1.12e-10	2.1e-09	cqu04145	Tubulin alpha-1 chain	TBA1_DROMETubulin alpha-1 chain OS=Drosophila melanogaster OX=7227 GN=alphaTub84B PE=1 SV=1	INVnr_XP_019548309.1_PREDICTED:_tubulin_alpha-1_chain_[Aedes_albopictus]
CPIJ016922	serine 3-dehydrogenase	164.581	1.11511	0.179846	6.20032	5.63e-10	9.45e-09	cqu00900,cqu00981	serine 3-dehydrogenase	SDR1_AEDAEFarnesol dehydrogenase OS=Aedes aegypti OX=7159 GN=SDR-1 PE=1 SV=2	INVnr_XP_001867078.1_serine_3-dehydrogenase_[Culex_quinquefasciatus]
CPIJ013729	sterol regulatory element-binding protein cleavage-activating protein	48.5414	1.115	0.299695	3.72043	0.000198882	0.00100641		sterol regulatory element-binding cleavage-activating -like	SCAP_HUMANSterol regulatory element-binding cleavage-activating OS=Homo sapiens OX=9606 GN=SCAP PE=1 SV=4	INVnr_XP_001863686.1_sterol_regulatory_element-binding_protein_cleavage-activating_protein_[Culex_quinquefasciatus]
CPIJ006616	small nuclear ribonucleoprotein-associated protein B	32.3593	1.11422	0.292006	3.81572	0.000135785	0.00071915	cqu03040	small nuclear ribonucleo -associated B	RSMB_DROMESmall nuclear ribonucleo -associated B OS=Drosophila melanogaster OX=7227 GN= PE=1 SV=1	INVnr_XP_001848091.1_small_nuclear_ribonucleoprotein-associated_protein_B_[Culex_quinquefasciatus]
CPIJ009340	conserved hypothetical protein	16.8319	1.11326	0.372334	2.98995	0.00279026	0.0098717		proteasome assembly chaperone 4 isoform X2	---NA---	INVnr_XP_001851265.1_conserved_hypothetical_protein_[Culex_quinquefasciatus]
CPIJ012308	tetratricopeptide repeat protein 35	69.5127	1.11117	0.22555	4.92649	8.37e-07	7.63e-06		tetratricopeptide repeat 35	EMC2_XENTRER membrane complex subunit 2 OS=Xenopus tropicalis OX=8364 GN=emc2 PE=2 SV=1	INVnr_XP_001862551.1_tetratricopeptide_repeat_protein_35_[Culex_quinquefasciatus]
CPIJ014505	conserved hypothetical protein	17.8914	1.11057	0.36978	3.00331	0.00267058	0.00953932		conserved hypothetical protein	NDUF2_HUMANNADH dehydrogenase	INVnr_XP_001864709.1_conserved_hypothetical_protein_[Culex_quinquefasciatus]
CPIJ015892	DNA-directed RNA polymerases III 12.5 kDa polypeptide	75.4386	1.11027	0.222901	4.981	6.33e-07	5.89e-06	cqu00230,cqu00240,cqu01100,cqu03020	DNA-directed RNA polymeraseIII kDa polypeptide	RPC10_HUMANDNA-directed RNA polymerase III subunit RPC10 OS=Homo sapiens OX=9606 GN=POLR3K PE=1 SV=2	INVnr_XP_001866125.1_DNA-directed_RNA_polymeraseIII_12.5_kDa_polypeptide_[Culex_quinquefasciatus]
CPIJ018143	conserved hypothetical protein	9.89596	1.10945	0.453354	2.44721	0.0143967	0.0397376		histidine methyltransferase 1 homolog	MET18_RATHistidine methyltransferase 1 homolog OS=Rattus norvegicus OX=10116 GN=Mettl18 PE=2 SV=1	INVnr_XP_001868217.1_conserved_hypothetical_protein_[Culex_quinquefasciatus]
CPIJ018539	wd-repeat protein	41.3938	1.10769	0.272253	4.06859	4.73e-05	0.000285738		periodic tryptophan 1 homolog	PWP1_BOVINPeriodic tryptophan 1 homolog OS=Bos taurus OX=9913 GN=PWP1 PE=2 SV=1	INVnr_XP_001868901.1_wd-repeat_protein_[Culex_quinquefasciatus]
CPIJ010381	conserved hypothetical protein	70.6747	1.10632	0.218504	5.06317	4.12e-07	4e-06		conserved hypothetical protein	---NA---	INVnr_XP_001870877.1_conserved_hypothetical_protein_[Culex_quinquefasciatus]
CPIJ007339	RNA-binding protein 8A	27.9535	1.10328	0.311592	3.54077	0.000398962	0.00184402	cqu03013,cqu03015,cqu03040	RNA-binding 8A	RBM8A_DROMERNA-binding 8A OS=Drosophila melanogaster OX=7227 GN=tsu PE=1 SV=1	INVnr_XP_001849141.1_RNA-binding_protein_8A_[Culex_quinquefasciatus]
CPIJ006723	apyrase	25.9498	1.10271	0.316986	3.47874	0.000503777	0.00226026	cqu00230,cqu00240	apyrase	CANT1_RATSoluble calcium-activated nucleotidase 1 OS=Rattus norvegicus OX=10116 GN=Cant1 PE=1 SV=1	INVnr_XP_001849098.1_apyrase_[Culex_quinquefasciatus]
CPIJ003202	conserved hypothetical protein	130.592	1.10212	0.178452	6.17602	6.57e-10	1.1e-08		flocculation FLO11-like	---NA---	INVnr_XP_001844790.1_conserved_hypothetical_protein_[Culex_quinquefasciatus]
CPIJ009671	WD repeat protein 18	30.0123	1.10173	0.30583	3.60244	0.000315246	0.00150447		WD repeat 18	WDR18_RATWD repeat-containing 18 OS=Rattus norvegicus OX=10116 GN=Wdr18 PE=2 SV=1	INVnr_XP_001852246.1_WD_repeat_protein_18_[Culex_quinquefasciatus]
CPIJ008917	sex-regulated protein janus-A	64.4121	1.10013	0.243285	4.52197	6.13e-06	4.58e-05		sex-regulated janus-A	JANA_DROPSSex-regulated janus-A OS=Drosophila pseudoobscura pseudoobscura OX=46245 GN=janA PE=3 SV=2	INVnr_XP_001850529.1_sex-regulated_protein_janus-A_[Culex_quinquefasciatus]
CPIJ018232	cholinesterase	2320.65	1.09839	0.116343	9.441	3.69e-21	2.53e-19		fatty acyl- hydrolase medium chain-like	ESTE_MYZPEEsterase E4 OS=Myzus persicae OX=13164 PE=1 SV=1	INVnr_XP_001868404.1_cholinesterase_[Culex_quinquefasciatus]
CPIJ009430	mitogen-activated protein kinase kinase 1-interacting protein 1	57.7775	1.09823	0.23538	4.66579	3.07e-06	2.45e-05	cqu04150	mitogen-activated kinase kinase 1-interacting 1	LTOR3_DROMERagulator complex LAMTOR3 homolog OS=Drosophila melanogaster OX=7227 GN=CG5110 PE=2 SV=1	INVnr_XP_001851099.1_mitogen-activated_protein_kinase_kinase_1-interacting_protein_1_[Culex_quinquefasciatus]
CPIJ002692	adipocyte plasma membrane-associated protein	147.114	1.09779	0.175984	6.23804	4.43e-10	7.61e-09		adipocyte plasma membrane-associated	APMAP_BOVINAdipocyte plasma membrane-associated OS=Bos taurus OX=9913 GN=APMAP PE=2 SV=1	INVnr_XP_001844275.1_adipocyte_plasma_membrane-associated_protein_[Culex_quinquefasciatus]
CPIJ013962	sumo-1-activating enzyme E1a	19.6384	1.09455	0.349905	3.12812	0.00175928	0.00667692	cqu04120	sumo-1-activating enzyme E1a	SAE1_XENTRSUMO-activating enzyme subunit 1 OS=Xenopus tropicalis OX=8364 GN=sae1 PE=2 SV=1	INVnr_XP_001864747.1_sumo-1-activating_enzyme_E1a_[Culex_quinquefasciatus]
CPIJ006076	hypodermin-B precursor	145.101	1.09387	0.229446	4.76744	1.87e-06	1.56e-05		trypsin theta	TRY7_ANOGATrypsin-7 OS=Anopheles gambiae OX=7165 GN=TRYP7 PE=2 SV=2	INVnr_XP_001847490.1_hypodermin-B_[Culex_quinquefasciatus]
CPIJ012373	virus-induced RNA, putative	28.1769	1.0925	0.313936	3.48001	0.000501396	0.00225388		virus-induced RNA	ICA_APIMEIcarapin-like OS=Apis mellifera OX=7460 PE=2 SV=1	INVnr_XP_001863375.1_virus-induced_RNA_[Culex_quinquefasciatus]
CPIJ007629	splicing factor, putative	150.441	1.0923	0.178079	6.13378	8.58e-10	1.42e-08		splicing factor	IF4H_PONABEukaryotic translation initiation factor 4H OS=Pongo abelii OX=9601 GN=EIF4H PE=2 SV=1	INVnr_XP_001848859.1_splicing_factor_[Culex_quinquefasciatus]
CPIJ007314	mitochondrial 18 kDa protein	40.0964	1.0907	0.267342	4.07981	4.51e-05	0.000274394		mitochondrial 18 kDa	MTFP1_CAEELMitochondrial fission process 1 OS=Caenorhabditis elegans OX=6239 GN=mtp-18 PE=3 SV=2	INVnr_XP_001848682.1_mitochondrial_18_kDa_protein_[Culex_quinquefasciatus]
CPIJ020092	conserved hypothetical protein	146.878	1.09061	0.183602	5.94007	2.85e-09	4.29e-08	cqu00620	lactoylglutathione lyase	LGUL_RATLactoylglutathione lyase OS=Rattus norvegicus OX=10116 GN=Glo1 PE=1 SV=3	INVnr_XP_001870320.1_conserved_hypothetical_protein_[Culex_quinquefasciatus]
CPIJ002642	apoptosis-inducing factor 1, mitochondrial precursor	49.8197	1.08992	0.26135	4.17036	3.04e-05	0.000192642	cqu04214	apoptosis-inducing factor mitochondrial	AIFM1_DROME apoptosis-inducing factor mitochondrial OS=Drosophila melanogaster OX=7227 GN=AIF PE=2 SV=2	INVnr_XP_001844711.1_apoptosis-inducing_factor_1,_mitochondrial_[Culex_quinquefasciatus]
CPIJ007787	conserved hypothetical protein	9.13086	1.08794	0.454694	2.39268	0.0167258	0.0451312		conserved hypothetical protein	YMH6_CAEELUncharacterized protein F58A4.6 OS=Caenorhabditis elegans OX=6239 GN=F58A4.6 PE=4 SV=3	INVnr_XP_001849290.1_conserved_hypothetical_protein_[Culex_quinquefasciatus]
CPIJ003456	uricase	11.5625	1.08762	0.439299	2.4758	0.0132937	0.0370854	cqu00230,cqu00232,cqu01100	urate oxidase	URIC_DROMEUricase OS=Drosophila melanogaster OX=7227 GN=Uro PE=2 SV=2	INVnr_XP_001845096.1_uricase_[Culex_quinquefasciatus]
CPIJ002757	conserved hypothetical protein	17.3997	1.08731	0.385895	2.81763	0.004838	0.0157699		cellular tumor antigen p53 isoform X3	P53_CRIGRCellular tumor antigen p53 OS=Cricetulus griseus OX=10029 GN=TP53 PE=2 SV=1	INVnr_XP_001844340.1_conserved_hypothetical_protein_[Culex_quinquefasciatus]
CPIJ011923	conserved hypothetical protein	2359.55	1.0863	0.098538	11.0241	2.92e-28	3.49e-26		natterin-4 isoform X3	---NA---	INVnr_XP_001862136.1_conserved_hypothetical_protein_[Culex_quinquefasciatus]
CPIJ015622	dynein light chain 1, cytoplasmic-like protein	23.0938	1.08526	0.335563	3.23415	0.00122004	0.00487464		dynein light chain cytoplasmic isoform X2	DYL1_DROMEDynein light chain cytoplasmic OS=Drosophila melanogaster OX=7227 GN=ctp PE=1 SV=1	INVnr_XP_001865724.1_dynein_light_chain_1,_cytoplasmic-like_protein_[Culex_quinquefasciatus]
CPIJ002158	conserved hypothetical protein	11.3293	1.08303	0.42381	2.55547	0.0106046	0.0305266		autophagy-related 13 homolog isoform X2	ATG13_DROMEAutophagy-related 13 homolog OS=Drosophila melanogaster OX=7227 GN=Atg13 PE=1 SV=1	INVnr_XP_001843426.1_conserved_hypothetical_protein_[Culex_quinquefasciatus]
CPIJ005886	polyribonucleotide nucleotidyltransferase 1, mitochondrial precursor	9.9992	1.0814	0.452095	2.39198	0.0167578	0.0451749	cqu00230,cqu00240,cqu03018	polyribonucleotide nucleotidyltransferase mitochondrial	PNPT1_PONABPolyribonucleotide nucleotidyltransferase mitochondrial OS=Pongo abelii OX=9601 GN=PNPT1 PE=2 SV=2	INVnr_XP_001847711.1_polyribonucleotide_nucleotidyltransferase_1,_mitochondrial_[Culex_quinquefasciatus]
CPIJ006563	UDP-sugar transporter UST74c	51.34	1.08054	0.284105	3.80331	0.000142778	0.000749941		UDP-sugar transporter UST74c	US74C_DROMEUDP-sugar transporter UST74c OS=Drosophila melanogaster OX=7227 GN=frc PE=1 SV=2	INVnr_XP_001848060.1_UDP-sugar_transporter_UST74c_[Culex_quinquefasciatus]
CPIJ009939	conserved hypothetical protein	15.3808	1.07935	0.392932	2.74692	0.0060157	0.0189088		mannosyl-oligosaccharide alpha-1,2-mannosidase IA isoform X1	MA1A1_DROMEMannosyl-oligosaccharide alpha-1,2-mannosidase IA OS=Drosophila melanogaster OX=7227 GN=alpha-Man-Ia PE=2 SV=2	INVnr_XP_001870736.1_conserved_hypothetical_protein_[Culex_quinquefasciatus]
CPIJ013093	hypothetical protein	1467.4	1.077	0.131349	8.19951	2.41e-16	1e-14	cqu00190,cqu01100	hypothetical protein CpipJ_CPIJ013093	---NA---	INVnr_XP_001863395.1_hypothetical_protein_CpipJ_CPIJ013093_[Culex_quinquefasciatus]
CPIJ006139	mitochondrial ribosomal protein, L53, putative	16.4319	1.07665	0.381365	2.82315	0.00475545	0.0155368		mitochondrial ribosomal L53	---NA---	INVnr_XP_001847583.1_mitochondrial_ribosomal_protein,_L53_[Culex_quinquefasciatus]
CPIJ003123	DNA-directed RNA polymerase I 40 kDa polypeptide	22.2739	1.07614	0.336383	3.19916	0.00137829	0.0053997	cqu00230,cqu00240,cqu01100,cqu03020	DNA-directed RNA polymerase I 40 kDa polypeptide	RPAC1_BOVINDNA-directed RNA polymerases I and III subunit RPAC1 OS=Bos taurus OX=9913 GN=POLR1C PE=2 SV=1	INVnr_XP_001844509.1_DNA-directed_RNA_polymerase_I_40_kDa_polypeptide_[Culex_quinquefasciatus]
CPIJ015705	aquaporin-1	68.4413	1.07614	0.218021	4.93595	7.98e-07	7.29e-06		aquaporin isoform X3	AQP_AEDAEAquaporin OS=Aedes aegypti OX=7159 GN=AAEL003512 PE=2 SV=2	INVnr_XP_001865732.1_aquaporin-1_[Culex_quinquefasciatus]
CPIJ004082	conserved hypothetical protein	251.412	1.07511	0.162073	6.63353	3.28e-11	6.67e-10	cqu04144	ras-related Rab-11A isoform X1	RB11B_DIPOMRas-related Rab-11B OS=Diplobatis ommata OX=1870830 PE=2 SV=1	INVnr_XP_001845712.1_conserved_hypothetical_protein_[Culex_quinquefasciatus]
CPIJ012633	conserved hypothetical protein	634.658	1.07389	0.372418	2.88357	0.00393197	0.0132394		conserved hypothetical protein	REF2P_DROME ref(2)P OS=Drosophila melanogaster OX=7227 GN=ref(2)P PE=1 SV=2	INVnr_XP_001862557.1_conserved_hypothetical_protein_[Culex_quinquefasciatus]
CPIJ011517	Tes39	35.657	1.07127	0.287649	3.72422	0.00019592	0.000992136		ubiquitin 5	UBL5_DROMEUbiquitin 5 OS=Drosophila melanogaster OX=7227 GN=ubl PE=3 SV=1	INVnr_XP_019558579.1_PREDICTED:_ubiquitin-like_protein_5_[Aedes_albopictus]
CPIJ015549	ribosomal biogenesis protein Gar2	37.8892	1.06968	0.274983	3.88998	0.000100252	0.000552994		ribosomal biogenesis Gar2	MK67I_DANREMKI67 FHA domain-interacting nucleolar phospho OS=Danio rerio OX=7955 GN=nifk PE=2 SV=2	INVnr_XP_001865709.1_ribosomal_biogenesis_protein_Gar2_[Culex_quinquefasciatus]
CPIJ000466	conserved hypothetical protein	43.6361	1.0696	0.298926	3.57814	0.000346051	0.00163267		TLD domain-containing 1	TLDC1_XENLATLD domain-containing 1 OS=Xenopus laevis OX=8355 GN=tldc1 PE=2 SV=1	INVnr_XP_001842136.1_conserved_hypothetical_protein_[Culex_quinquefasciatus]
CPIJ011978	conserved hypothetical protein	30.5393	1.06831	0.306534	3.48512	0.000491923	0.00222122		immediate early response 3-interacting 1	IR3IP_XENLAImmediate early response 3-interacting 1 OS=Xenopus laevis OX=8355 GN=ier3ip1 PE=3 SV=1	INVnr_XP_001862333.1_conserved_hypothetical_protein_[Culex_quinquefasciatus]
CPIJ002065	hydroxymethylglutaryl-CoA synthase 1	21.2698	1.06792	0.350983	3.04265	0.00234507	0.00853677	cqu00072,cqu00280,cqu00650,cqu00900,cqu01100	hydroxymethylglutaryl- synthase 1	HMCS1_BLAGEHydroxymethylglutaryl- synthase 1 OS=Blattella germanica OX=6973 GN=HMGCS-1 PE=2 SV=1	INVnr_XP_001843333.1_hydroxymethylglutaryl-CoA_synthase_1_[Culex_quinquefasciatus]
CPIJ008180	conserved hypothetical protein	130.216	1.06786	0.177583	6.0133	1.82e-09	2.84e-08	cqu03008,cqu03013	ribonuclease P subunit p40-like isoform X2	U184_AEDAEUPF0184 AAEL002161 OS=Aedes aegypti OX=7159 GN=AAEL002161 PE=3 SV=1	INVnr_XP_001849815.1_conserved_hypothetical_protein_[Culex_quinquefasciatus]
CPIJ000665	galectin, putative	743.479	1.06497	0.147949	7.1982	6.1e-13	1.65e-11		32 kDa beta-galactoside-binding lectin lec-3	LEC3_CAEEL32 kDa beta-galactoside-binding lectin lec-3 OS=Caenorhabditis elegans OX=6239 GN=lec-3 PE=2 SV=3	INVnr_XP_001842230.1_galectin_[Culex_quinquefasciatus]
CPIJ006164	serine palmitoyltransferase 1	102.035	1.06442	0.244341	4.35629	1.32e-05	9.24e-05	cqu00600,cqu01100	serine palmitoyltransferase 1	SPTC1_MOUSESerine palmitoyltransferase 1 OS=Mus musculus OX=10090 GN=Sptlc1 PE=1 SV=2	INVnr_XP_001847608.1_serine_palmitoyltransferase_1_[Culex_quinquefasciatus]
CPIJ008199	conserved hypothetical protein	303.605	1.06392	0.159887	6.65416	2.85e-11	5.87e-10	cqu00590,cqu01100	conserved hypothetical protein	DAF41_CAEELCo-chaperone daf-41 OS=Caenorhabditis elegans OX=6239 GN=daf-41 PE=2 SV=1	INVnr_XP_001849449.1_conserved_hypothetical_protein_[Culex_quinquefasciatus]
CPIJ009433	conserved hypothetical protein	58.8962	1.06202	0.250253	4.2438	2.2e-05	0.000144135		hypothetical conserved	TM199_HUMANTransmembrane 199 OS=Homo sapiens OX=9606 GN=TMEM199 PE=1 SV=1	INVnr_XP_001851102.1_conserved_hypothetical_protein_[Culex_quinquefasciatus]
CPIJ010740	conserved protein, putative	84.9173	1.06143	0.227313	4.66947	3.02e-06	2.42e-05		small integral membrane 14	SIM14_BOVINSmall integral membrane 14 OS=Bos taurus OX=9913 GN=SMIM14 PE=3 SV=1	INVnr_XP_001858490.1_conserved_hypothetical_protein_[Culex_quinquefasciatus]
CPIJ015123	sterol carrier protein-2, putative	9926.01	1.06128	0.110282	9.62332	6.37e-22	4.83e-20		sterol carrier -2	NLTP1_CAEELNon-specific lipid-transfer -like 1 OS=Caenorhabditis elegans OX=6239 GN=nlt-1 PE=4 SV=1	INVnr_XP_001865125.1_sterol_carrier_protein-2_[Culex_quinquefasciatus]
CPIJ011261	cell cycle control protein cwf8	14.1419	1.05891	0.398121	2.65976	0.00781952	0.0237666	cqu03040,cqu04120	cell cycle control cwf8	PRP19_HUMANPre-mRNA-processing factor 19 OS=Homo sapiens OX=9606 GN=PRPF19 PE=1 SV=1	INVnr_XP_001861543.1_cell_cycle_control_protein_cwf8_[Culex_quinquefasciatus]
CPIJ003559	tubulin-specific chaperone A	52.2028	1.0588	0.25969	4.07718	4.56e-05	0.000277054		tubulin-specific chaperone A	TBCA_CHICKTubulin-specific chaperone A OS=Gallus gallus OX=9031 GN=TBCA PE=1 SV=2	INVnr_XP_001845227.1_tubulin-specific_chaperone_A_[Culex_quinquefasciatus]
CPIJ006080	trypsin theta precursor	14053.9	1.05642	0.102881	10.2683	9.79e-25	9.71e-23		trypsin theta	TRY7_ANOGATrypsin-7 OS=Anopheles gambiae OX=7165 GN=TRYP7 PE=2 SV=2	INVnr_XP_001847494.1_trypsin_theta_[Culex_quinquefasciatus]
CPIJ000846	conserved hypothetical protein	18.3415	1.05505	0.383019	2.75457	0.0058769	0.018547		BUB3-interacting and GLEBS motif-containing ZNF207 isoform X4	ZN207_XENLABUB3-interacting and GLEBS motif-containing ZNF207 OS=Xenopus laevis OX=8355 GN=znf207 PE=1 SV=1	INVnr_XP_001842469.1_conserved_hypothetical_protein_[Culex_quinquefasciatus]
CPIJ005984	conserved hypothetical protein	29.5441	1.05474	0.299639	3.52002	0.000431507	0.00198015		c-type lectin	---NA---	INVnr_XP_001847297.1_conserved_hypothetical_protein_[Culex_quinquefasciatus]
CPIJ003331	conserved hypothetical protein	12.9752	1.05296	0.405619	2.59592	0.00943372	0.0278621		OPA3 CG13603 isoform X1	OPA32_DROME OPA3 CG13603 OS=Drosophila melanogaster OX=7227 GN=CG13601 PE=2 SV=1	INVnr_XP_001845057.1_conserved_hypothetical_protein_[Culex_quinquefasciatus]
CPIJ012850	splicing factor u2af large subunit	49.3622	1.05009	0.249075	4.21594	2.49e-05	0.000160743	cqu03040	splicing factor u2af large subunit	U2AF2_DROMESplicing factor U2AF 50 kDa subunit OS=Drosophila melanogaster OX=7227 GN=U2af50 PE=1 SV=1	INVnr_XP_001863087.1_splicing_factor_u2af_large_subunit_[Culex_quinquefasciatus]
CPIJ018993	allergen, putative	4034.36	1.05008	0.0956865	10.9742	5.09e-28	5.97e-26		probable fatty acid-binding	FABP_ANOGAProbable fatty acid-binding OS=Anopheles gambiae OX=7165 GN=ENSANGG00000000821 PE=3 SV=2	INVnr_XP_001864031.1_allergen_[Culex_quinquefasciatus]
CPIJ000563	conserved hypothetical protein	29.9807	1.04939	0.301254	3.48339	0.000495102	0.00223087		conserved hypothetical protein	---NA---	INVnr_XP_001842326.1_conserved_hypothetical_protein_[Culex_quinquefasciatus]
CPIJ019902	conserved hypothetical protein	23.409	1.0492	0.33298	3.15093	0.0016275	0.00624405		conserved hypothetical protein	---NA---	INVnr_XP_001870144.1_conserved_hypothetical_protein_[Culex_quinquefasciatus]
CPIJ016851	CYP6Y5: cytochrome P450 6Y5	33.6491	1.04776	0.295327	3.54778	0.000388489	0.00180748		cytochrome P450	CP6A2_DROMECytochrome P450 6a2 OS=Drosophila melanogaster OX=7227 GN=Cyp6a2 PE=2 SV=2	INVnr_XP_001867276.1_cytochrome_P450_6a9_[Culex_quinquefasciatus]
CPIJ001564	selenide	101.739	1.04672	0.210848	4.96435	6.89e-07	6.37e-06	cqu00450,cqu01100	water dikinase	water dikinase OS=Drosophila melanogaster OX=7227 GN= PE=2 SV=1	INVnr_XP_001843048.1_selenide_[Culex_quinquefasciatus]
CPIJ005831	GTPase activating protein RanGAP1	15.1397	1.04659	0.396782	2.63771	0.0083469	0.0250514	cqu03013	ran GTPase-activating	RAGP1_DROMERan GTPase-activating OS=Drosophila melanogaster OX=7227 GN= PE=1 SV=1	INVnr_XP_019544873.1_PREDICTED:_ran_GTPase-activating_protein-like_[Aedes_albopictus]
CPIJ018658	ubiquitin-conjugating enzyme E2 G2	27.4293	1.04656	0.3093	3.38365	0.000715304	0.00308738	cqu04120,cqu04141	ubiquitin-conjugating enzyme E2 G2	UB2G2_PONABUbiquitin-conjugating enzyme E2 G2 OS=Pongo abelii OX=9601 GN=UBE2G2 PE=2 SV=1	INVnr_XP_001868916.1_ubiquitin-conjugating_enzyme_E2_G2_[Culex_quinquefasciatus]
CPIJ002517	oxidoreductase	11.9675	1.04461	0.415128	2.51636	0.0118575	0.0336383		farnesol dehydrogenase-like	SDR1_AEDAEFarnesol dehydrogenase OS=Aedes aegypti OX=7159 GN=SDR-1 PE=1 SV=2	INVnr_XP_001844186.1_oxidoreductase_[Culex_quinquefasciatus]
CPIJ018834	conserved hypothetical protein	21.1367	1.04406	0.345182	3.02466	0.0024891	0.00897298		transmembrane 223	TM223_DANRETransmembrane 223 OS=Danio rerio OX=7955 GN=tmem223 PE=2 SV=1	INVnr_XP_001869108.1_conserved_hypothetical_protein_[Culex_quinquefasciatus]
CPIJ011268	tetraspanin, putative	987.559	1.04378	0.139162	7.50051	6.36e-14	1.94e-12	cqu04142	23 kDa integral membrane -like isoform X1	TSN36_DANRETetraspanin-36 OS=Danio rerio OX=7955 GN=tspan36 PE=1 SV=2	INVnr_XP_001861550.1_tetraspanin_[Culex_quinquefasciatus]
CPIJ002854	U3 small nucleolar RNA-associated protein 15	19.2828	1.04311	0.354451	2.9429	0.00325155	0.0112716	cqu03008	U3 small nucleolar RNA-associated 15 homolog	UTP15_RATU3 small nucleolar RNA-associated 15 homolog OS=Rattus norvegicus OX=10116 GN=Utp15 PE=2 SV=1	INVnr_XP_001844385.1_U3_small_nucleolar_RNA-associated_protein_15_[Culex_quinquefasciatus]
CPIJ016097	peroxisomal membrane protein 70 abcd3	133.483	1.04008	0.202195	5.14392	2.69e-07	2.71e-06	cqu02010,cqu04146	peroxisomal membrane 70 abcd3	ABCD3_HUMANATP-binding cassette sub-family D member 3 OS=Homo sapiens OX=9606 GN=ABCD3 PE=1 SV=1	INVnr_XP_001866626.1_peroxisomal_membrane_protein_70_abcd3_[Culex_quinquefasciatus]
CPIJ014495	transient receptor potential cation channel protein painless	50.1716	1.04002	0.267679	3.88531	0.000102198	0.000561533		transient receptor potential cation channel painless	PAIN_DROMETransient receptor potential cation channel painless OS=Drosophila melanogaster OX=7227 GN=pain PE=1 SV=1	INVnr_XP_001864789.1_transient_receptor_potential_cation_channel_protein_painless_[Culex_quinquefasciatus]
CPIJ002278	S-methyl-5-thioadenosine phosphorylase	45.7516	1.03939	0.255333	4.0707	4.69e-05	0.000284135	cqu00270,cqu01100	S-methyl-5 -thioadenosine phosphorylase	MTAP_AEDAES-methyl-5 -thioadenosine phosphorylase OS=Aedes aegypti OX=7159 GN=AAEL012172 PE=3 SV=1	INVnr_XP_001843947.1_S-methyl-5-thioadenosine_phosphorylase_[Culex_quinquefasciatus]
CPIJ016848	CYP6M14: cytochrome P450 6M14	248.34	1.03855	0.182336	5.69577	1.23e-08	1.65e-07		cytochrome P450 6a8	C6A14_DROMEProbable cytochrome P450 6a14 OS=Drosophila melanogaster OX=7227 GN=Cyp6a14 PE=3 SV=2	INVnr_XP_001867273.1_cytochrome_P450_93A3_[Culex_quinquefasciatus]
CPIJ002685	POSSIBLE ENOYL-CoA HYDRATASE ECHA12	160.267	1.03712	0.172606	6.00861	1.87e-09	2.92e-08	cqu04146	enoyl- hydratase ECHA12	ECH1_MOUSEDelta(3,5)-Delta(2,4)-dienoyl- mitochondrial OS=Mus musculus OX=10090 GN=Ech1 PE=1 SV=1	INVnr_XP_001844268.1_enoyl-CoA_hydratase_ECHA12_[Culex_quinquefasciatus]
CPIJ003888	conserved hypothetical protein	48.9655	1.03429	0.248283	4.16576	3.1e-05	0.000195868		serine arginine repetitive matrix 2 isoform X1	PPRC1_MOUSEPeroxisome proliferator-activated receptor gamma coactivator-related 1 OS=Mus musculus OX=10090 GN=Pprc1 PE=1 SV=1	INVnr_XP_001845556.1_conserved_hypothetical_protein_[Culex_quinquefasciatus]
CPIJ010835	short-chain dehydrogenase	18.1945	1.03412	0.357184	2.89519	0.0037893	0.0128511		short-chain dehydrogenase	RDH13_HUMANRetinol dehydrogenase 13 OS=Homo sapiens OX=9606 GN=RDH13 PE=1 SV=2	INVnr_XP_001861330.1_short-chain_dehydrogenase_[Culex_quinquefasciatus]
CPIJ003174	ubiquitin fusion degradation protein 2	24.8108	1.03319	0.344153	3.00213	0.00268093	0.00955693	cqu03010	ubiquitin fusion degradation 2	RNF37_HUMANRING finger 37 OS=Homo sapiens OX=9606 GN=UBOX5 PE=1 SV=1	INVnr_XP_001844762.1_ubiquitin_fusion_degradation_protein_2_[Culex_quinquefasciatus]
CPIJ010425	transportin-3	53.5678	1.03241	0.284804	3.62497	0.000288991	0.00139619		transportin-3 isoform X2	TNPO3_HUMANTransportin-3 OS=Homo sapiens OX=9606 GN=TNPO3 PE=1 SV=3	INVnr_XP_001853537.1_transportin-3_[Culex_quinquefasciatus]
CPIJ009054	coiled-coil domain-containing protein 47 precursor	147.4	1.03237	0.17913	5.76325	8.25e-09	1.15e-07		coiled-coil domain-containing 47	CCD47_HUMANCoiled-coil domain-containing 47 OS=Homo sapiens OX=9606 GN=CCDC47 PE=1 SV=1	INVnr_XP_001850592.1_coiled-coil_domain-containing_protein_47_[Culex_quinquefasciatus]
CPIJ012528	derlin-2.1	90.8956	1.03184	0.211739	4.87315	1.1e-06	9.69e-06	cqu04141	derlin 1	DERL1_DROMEDerlin-1 OS=Drosophila melanogaster OX=7227 GN=Der-1 PE=2 SV=1	INVnr_XP_001863080.1_derlin-2.1_[Culex_quinquefasciatus]
CPIJ000191	sugar transporter	62.9071	1.03112	0.256023	4.02745	5.64e-05	0.000332366		facilitated trehalose transporter Tret1-like	TRET1_CULQUFacilitated trehalose transporter Tret1 OS=Culex quinquefasciatus OX=7176 GN=Tret1 PE=3 SV=1	INVnr_XP_001841956.1_sugar_transporter_[Culex_quinquefasciatus]
CPIJ002574	conserved hypothetical protein	15.0646	1.03079	0.412934	2.49627	0.0125508	0.0352925		transient receptor potential cation channel painless-like isoform X1	PAIN_DROMETransient receptor potential cation channel painless OS=Drosophila melanogaster OX=7227 GN=pain PE=1 SV=1	INVnr_XP_001844643.1_conserved_hypothetical_protein_[Culex_quinquefasciatus]
CPIJ016660	conserved hypothetical protein	27.9418	1.02926	0.31002	3.31998	0.000900226	0.00373891		conserved hypothetical protein	LNPB_DANREEndoplasmic reticulum junction formation lunapark-B OS=Danio rerio OX=7955 GN=lnpkb PE=2 SV=2	INVnr_XP_001866725.1_conserved_hypothetical_protein_[Culex_quinquefasciatus]
CPIJ017540	coatomer subunit delta	64.2329	1.02745	0.235225	4.36797	1.25e-05	8.81e-05		coatomer subunit delta	COPD_HUMANCoatomer subunit delta OS=Homo sapiens OX=9606 GN=ARCN1 PE=1 SV=1	INVnr_XP_001867645.1_coatomer_subunit_delta_[Culex_quinquefasciatus]
CPIJ008580	mitochondrial carrier protein, putative	18.942	1.02744	0.352828	2.912	0.00359123	0.0122383		S-adenosylmethionine mitochondrial carrier homolog	SAMC_DROMES-adenosylmethionine mitochondrial carrier homolog OS=Drosophila melanogaster OX=7227 GN=CG4743 PE=2 SV=2	INVnr_XP_001850176.1_mitochondrial_carrier_protein_[Culex_quinquefasciatus]
CPIJ002096	importin-7	201.917	1.02613	0.184257	5.569	2.56e-08	3.23e-07	cqu04013	importin-7 isoform X2	IPO7_MOUSEImportin-7 OS=Mus musculus OX=10090 GN=Ipo7 PE=1 SV=2	INVnr_XP_001843364.1_importin-7_[Culex_quinquefasciatus]
CPIJ003802	NADP-dependent leukotriene B4 12-hydroxydehydrogenase	1229.88	1.02569	0.388011	2.64347	0.00820622	0.0247134		NADP-dependent leukotriene B4 12-hydroxydehydrogenase	PTGR1_MOUSEProstaglandin reductase 1 OS=Mus musculus OX=10090 GN=Ptgr1 PE=1 SV=2	INVnr_XP_001845375.1_NADP-dependent_leukotriene_B4_12-hydroxydehydrogenase_[Culex_quinquefasciatus]
CPIJ002849	conserved hypothetical protein	11.1239	1.02516	0.430288	2.3825	0.0171954	0.0461611		conserved hypothetical protein	---NA---	INVnr_XP_001844380.1_conserved_hypothetical_protein_[Culex_quinquefasciatus]
CPIJ001901	predicted protein	88.5719	1.02377	0.203278	5.03629	4.75e-07	4.54e-06		small EDRK-rich factor 2	SERFL_DROME SERF OS=Drosophila melanogaster OX=7227 GN=CG17931 PE=3 SV=1	INVnr_XP_001843678.1_predicted_protein_[Culex_quinquefasciatus]
CPIJ016920	NADP-dependent L-serine/L-allo-threonine dehydrogenase ydfG	260.752	1.02283	0.173726	5.88763	3.92e-09	5.75e-08		NADP-dependent L-serine L-allo-threonine dehydrogenase ydfG	SDR1_AEDAEFarnesol dehydrogenase OS=Aedes aegypti OX=7159 GN=SDR-1 PE=1 SV=2	INVnr_XP_001867076.1_NADP-dependent_L-serine/L-allo-threonine_dehydrogenase_ydfG_[Culex_quinquefasciatus]
CPIJ015636	bestrophin 2,3,4	23.8385	1.02277	0.332483	3.07616	0.00209689	0.00776575		bestrophin 2,3,4	BEST3_MOUSEBestrophin-3 OS=Mus musculus OX=10090 GN=Best3 PE=2 SV=1	INVnr_XP_001865897.1_bestrophin_2,3,4_[Culex_quinquefasciatus]
CPIJ017546	HIG1 domain family member 1A	90.9168	1.02194	0.226128	4.51931	6.2e-06	4.63e-05		HIG1 domain family member mitochondrial isoform X2	HIG1A_RATHIG1 domain family member mitochondrial OS=Rattus norvegicus OX=10116 GN=Higd1a PE=1 SV=2	INVnr_XP_001867651.1_HIG1_domain_family_member_1A_[Culex_quinquefasciatus]
CPIJ005635	camp-specific cyclic nucleotide phosphodiesterase	20.3593	1.02141	0.358833	2.84648	0.00442059	0.0145712	cqu00230	c-AMP specific cyclic nucleotide phosphodiesterase	PDE8_DROMEHigh affinity cAMP-specific and IBMX-insensitive 3 ,5 -cyclic phosphodiesterase 8 OS=Drosophila melanogaster OX=7227 GN=Pde8 PE=2 SV=1	INVnr_XP_001847184.1_c-AMP_specific_cyclic_nucleotide_phosphodiesterase_[Culex_quinquefasciatus]
CPIJ005730	conserved hypothetical protein	539.121	1.02079	0.124152	8.22212	2e-16	8.38e-15	cqu04141	conserved hypothetical protein	XBP1_BOVINX-box-binding 1 OS=Bos taurus OX=9913 GN=XBP1 PE=2 SV=1	INVnr_XP_001847153.1_conserved_hypothetical_protein_[Culex_quinquefasciatus]
CPIJ003767	conserved hypothetical protein	80.407	1.02062	0.254741	4.00652	6.16e-05	0.000358425	cqu04013,cqu04214,cqu04624	transcription factor kayak isoform X4	FOSL_DROMOTranscription factor kayak OS=Drosophila mojavensis OX=7230 GN=kay PE=3 SV=1	INVnr_XP_001845340.1_conserved_hypothetical_protein_[Culex_quinquefasciatus]
CPIJ000503	mitochondrial ATPase inhibitor, putative	670.628	1.01972	0.122322	8.33641	7.66e-17	3.46e-15		mitochondrial ATPase inhibitor	---NA---	INVnr_XP_001842173.1_mitochondrial_ATPase_inhibitor_[Culex_quinquefasciatus]
CPIJ007943	peroxiredoxin 5, prdx5	113.232	1.01697	0.183987	5.52744	3.25e-08	4.02e-07	cqu04146	peroxiredoxin prdx5	PRDX5_HUMANPeroxiredoxin- mitochondrial OS=Homo sapiens OX=9606 GN=PRDX5 PE=1 SV=4	INVnr_XP_001849745.1_peroxiredoxin_5,_prdx5_[Culex_quinquefasciatus]
CPIJ007775	apolipophorin-III, putative	71.0115	1.01643	0.23561	4.31404	1.6e-05	0.000109518		apolipophorin-III	APL3_MANSEApolipophorin-3 OS=Manduca sexta OX=7130 PE=1 SV=1	INVnr_XP_001849278.1_apolipophorin-III_[Culex_quinquefasciatus]
CPIJ019940	tubulin alpha-1 chain	175.242	1.01609	0.186094	5.46008	4.76e-08	5.6e-07	cqu04145	Tubulin alpha-1 chain	TBA1_DROMETubulin alpha-1 chain OS=Drosophila melanogaster OX=7227 GN=alphaTub84B PE=1 SV=1	INVnr_XP_019548309.1_PREDICTED:_tubulin_alpha-1_chain_[Aedes_albopictus]
CPIJ000275	poly polymerase 16	53.2879	1.0158	0.241728	4.20223	2.64e-05	0.000169556		poly polymerase 16	PAR16_RATMono	INVnr_XP_001841848.1_poly_polymerase_16_[Culex_quinquefasciatus]
CPIJ014577	phosphoglycerate mutase 2	101.979	1.0152	0.196015	5.17922	2.23e-07	2.27e-06	cqu00010,cqu00260,cqu01100,cqu01200,cqu01230	phosphoglycerate mutase 2	PGAM2_HUMANPhosphoglycerate mutase 2 OS=Homo sapiens OX=9606 GN=PGAM2 PE=1 SV=3	INVnr_XP_001864878.1_phosphoglycerate_mutase_2_[Culex_quinquefasciatus]
CPIJ015331	calmin	128.374	1.01484	0.19412	5.2279	1.71e-07	1.79e-06		calmin	SYNE1_MOUSENesprin-1 OS=Mus musculus OX=10090 GN=Syne1 PE=1 SV=2	INVnr_XP_001865282.1_calmin_[Culex_quinquefasciatus]
CPIJ018021	calcium-transporting atpase sarcoplasmic/endoplasmic reticulum type	133.72	1.01408	0.185461	5.46788	4.55e-08	5.38e-07		calcium-transporting ATPase sarcoplasmic endoplasmic reticulum type isoform X1	ATC1_ANOGACalcium-transporting ATPase sarcoplasmic endoplasmic reticulum type OS=Anopheles gambiae OX=7165 GN=Ca-P60A PE=3 SV=5	INVnr_XP_001868188.1_calcium-transporting_atpase_sarcoplasmic/endoplasmic_reticulum_type_[Culex_quinquefasciatus]
CPIJ006912	maggie	25.8099	1.01398	0.330092	3.07181	0.00212762	0.00786718		mitochondrial import receptor subunit TOM22 homolog isoform X2	TOM22_MACFAMitochondrial import receptor subunit TOM22 homolog OS=Macaca fascicularis OX=9541 GN=TOMM22 PE=2 SV=3	INVnr_XP_001848517.1_maggie_[Culex_quinquefasciatus]
CPIJ018231	carboxylesterase	288.69	1.01381	0.15694	6.45982	1.05e-10	1.97e-09		acylcarnitine hydrolase-like	EST1_RABITLiver carboxylesterase 1 OS=Oryctolagus cuniculus OX=9986 PE=1 SV=3	INVnr_XP_001868403.1_carboxylesterase_[Culex_quinquefasciatus]
CPIJ011359	thymidylate synthase	12.4418	1.01334	0.417527	2.427	0.0152243	0.0417121	cqu00240,cqu00670,cqu01100	thymidylate synthase	TYSY_DROMEThymidylate synthase OS=Drosophila melanogaster OX=7227 GN=Ts PE=1 SV=2	INVnr_XP_001861577.1_thymidylate_synthase_[Culex_quinquefasciatus]
CPIJ010137	zinc carboxypeptidase A 1 precursor	2457.42	1.01295	0.119579	8.47098	2.43e-17	1.14e-15		zinc carboxypeptidase A 1	CBPA1_ANOGAZinc carboxypeptidase A 1 OS=Anopheles gambiae OX=7165 GN=AGAP009593 PE=2 SV=3	INVnr_XP_001851495.1_zinc_carboxypeptidase_A_1_[Culex_quinquefasciatus]
CPIJ007255	cytidylate kinase	64.8331	1.01238	0.264077	3.83363	0.000126264	0.000676865	cqu00240,cqu01100	UMP-CMP kinase	KCY_XENTRUMP-CMP kinase OS=Xenopus tropicalis OX=8364 GN=cmpk1 PE=2 SV=2	INVnr_XP_001848791.1_cytidylate_kinase_[Culex_quinquefasciatus]
CPIJ010318	conserved hypothetical protein	111.333	1.01125	0.222128	4.55254	5.3e-06	4.04e-05		conserved hypothetical protein	---NA---	INVnr_XP_001858976.1_conserved_hypothetical_protein_[Culex_quinquefasciatus]
CPIJ004440	conserved hypothetical protein	56.8746	1.01111	0.236052	4.28342	1.84e-05	0.00012288		transmembrane 165	TM165_HUMANTransmembrane 165 OS=Homo sapiens OX=9606 GN=TMEM165 PE=1 SV=1	INVnr_XP_001846026.1_conserved_hypothetical_protein_[Culex_quinquefasciatus]
CPIJ013498	sui1	45.7519	1.00999	0.257958	3.91533	9.03e-05	0.000503294	cqu03013	translation factor SUI1 homolog	ETIF1_ANOGAEukaryotic translation initiation factor eIF1 OS=Anopheles gambiae OX=7165 GN=eIF1 PE=3 SV=1	INVnr_XP_001863733.1_sui1_[Culex_quinquefasciatus]
CPIJ002590	amsh	30.2678	1.00993	0.323917	3.11786	0.00182171	0.00688049	cqu04144	STAM-binding -like A	STABP_RATSTAM-binding OS=Rattus norvegicus OX=10116 GN=Stambp PE=2 SV=1	INVnr_XP_001844659.1_amsh_[Culex_quinquefasciatus]
CPIJ007966	conserved hypothetical protein	291.726	1.00868	0.155463	6.48824	8.68e-11	1.66e-09		proteoglycan 4 isoform X2	---NA---	INVnr_XP_001849920.1_conserved_hypothetical_protein_[Culex_quinquefasciatus]
CPIJ009818	heat shock protein	28.7768	1.0081	0.301891	3.33927	0.000839993	0.00353459		heat shock	HSPB1_BOVINHeat shock beta-1 OS=Bos taurus OX=9913 GN=HSPB1 PE=2 SV=1	INVnr_XP_001870766.1_heat_shock_protein_[Culex_quinquefasciatus]
CPIJ006275	organic anion transporter	159.653	1.00759	0.196409	5.13008	2.9e-07	2.9e-06		solute carrier organic anion transporter family member 3A1	SO3A1_MOUSESolute carrier organic anion transporter family member 3A1 OS=Mus musculus OX=10090 GN=Slco3a1 PE=1 SV=1	INVnr_XP_001847741.1_organic_anion_transporter_[Culex_quinquefasciatus]
CPIJ013224	conserved hypothetical protein	22.133	1.00558	0.347962	2.88992	0.00385336	0.013012		UPF0687 C20orf27 homolog	CT027_BOVINUPF0687 C20orf27 homolog OS=Bos taurus OX=9913 PE=2 SV=1	INVnr_XP_001863348.1_conserved_hypothetical_protein_[Culex_quinquefasciatus]
CPIJ010035	conserved hypothetical protein	48.9531	1.00396	0.251703	3.98869	6.64e-05	0.000384235		brain I3-like	BRI3_BOVINBrain I3 OS=Bos taurus OX=9913 GN=BRI3 PE=2 SV=1	INVnr_XP_001851394.1_conserved_hypothetical_protein_[Culex_quinquefasciatus]
CPIJ008366	mitochondrial malate dehydrogenase 2	980.15	1.00331	0.104322	9.61736	6.75e-22	5.06e-20	cqu00020,cqu00270,cqu00620,cqu00630,cqu01100,cqu01200	mitochondrial malate dehydrogenase 2	MDHM_RATMalate mitochondrial OS=Rattus norvegicus OX=10116 GN=Mdh2 PE=1 SV=2	INVnr_XP_001849862.1_mitochondrial_malate_dehydrogenase_2_[Culex_quinquefasciatus]
CPIJ012138	conserved hypothetical protein	1005.37	1.00306	0.11487	8.73213	2.5e-18	1.29e-16		conserved hypothetical protein	---NA---	INVnr_XP_001862752.1_conserved_hypothetical_protein_[Culex_quinquefasciatus]
CPIJ000872	signal peptide peptidase	149.369	1.00283	0.174091	5.76037	8.39e-09	1.17e-07		signal peptide peptidase	HM13_MOUSEMinor histocompatibility antigen H13 OS=Mus musculus OX=10090 GN=Hm13 PE=1 SV=1	INVnr_XP_001842495.1_signal_peptide_peptidase_[Culex_quinquefasciatus]
CPIJ018609	mitochondrial import inner membrane translocase subunit tim44	57.976	1.00192	0.233331	4.29398	1.75e-05	0.000118069		mitochondrial import inner membrane translocase subunit tim44	TIM44_MOUSEMitochondrial import inner membrane translocase subunit TIM44 OS=Mus musculus OX=10090 GN=Timm44 PE=1 SV=2	INVnr_XP_001868783.1_mitochondrial_import_inner_membrane_translocase_subunit_tim44_[Culex_quinquefasciatus]
CPIJ002063	mitochondrial ribosomal protein L42	32.5847	1.00064	0.299792	3.33778	0.000844498	0.00354508		39S ribosomal mitochondrial	RM42_PONAB39S ribosomal mitochondrial OS=Pongo abelii OX=9601 GN=MRPL42 PE=2 SV=1	INVnr_XP_001843331.1_mitochondrial_ribosomal_protein_L42_[Culex_quinquefasciatus]
CPIJ008579	conserved hypothetical protein	16.4497	1.00058	0.373171	2.68129	0.00733391	0.0225125		conserved hypothetical protein	---NA---	INVnr_XP_001850175.1_conserved_hypothetical_protein_[Culex_quinquefasciatus]
CPIJ011126	symplekin	32.9224	-1.00053	0.305488	-3.27519	0.00105592	0.00429937	cqu03015	symplekin	SYMPK_DROMESymplekin OS=Drosophila melanogaster OX=7227 GN=Sym PE=1 SV=1	INVnr_XP_001861369.1_symplekin_[Culex_quinquefasciatus]
CPIJ012238	protein phosphatase 4	73.4509	-1.00123	0.218563	-4.58096	4.63e-06	3.55e-05		phosphatase 4	PP4R1_MOUSESerine threonine- phosphatase 4 regulatory subunit 1 OS=Mus musculus OX=10090 GN=Ppp4r1 PE=1 SV=2	INVnr_XP_001862278.1_phosphatase_4_[Culex_quinquefasciatus]
CPIJ005423	vacuolar sorting protein	227.543	-1.00357	0.187122	-5.36319	8.18e-08	9.16e-07		sortilin-related receptor-like	SORL_RABITSortilin-related receptor OS=Oryctolagus cuniculus OX=9986 GN=SORL1 PE=2 SV=1	INVnr_XP_001846859.1_vacuolar_sorting_protein_[Culex_quinquefasciatus]
CPIJ004606	phd finger domain	56.2481	-1.00388	0.240951	-4.16633	3.1e-05	0.000195553		phd finger domain	P20L1_MOUSEPHD finger 20 1 OS=Mus musculus OX=10090 GN=Phf20l1 PE=1 SV=2	INVnr_XP_001846370.1_phd_finger_domain_[Culex_quinquefasciatus]
CPIJ008846	basic helix-loop-helix zip transcription factor	127.989	-1.00421	0.200486	-5.00888	5.47e-07	5.17e-06		carbohydrate-responsive element-binding isoform X1	MLXPL_RATCarbohydrate-responsive element-binding OS=Rattus norvegicus OX=10116 GN=Mlxipl PE=1 SV=1	INVnr_XP_001850764.1_basic_helix-loop-helix_zip_transcription_factor_[Culex_quinquefasciatus]
CPIJ009367	conserved hypothetical protein	54.4514	-1.00459	0.247595	-4.05741	4.96e-05	0.000296958		conserved hypothetical protein	---NA---	INVnr_XP_001850862.1_conserved_hypothetical_protein_[Culex_quinquefasciatus]
CPIJ002339	conserved hypothetical protein	325.367	-1.00538	0.147688	-6.80744	9.94e-12	2.19e-10		conserved hypothetical protein	GILT1_DROMEGILT 1 OS=Drosophila melanogaster OX=7227 GN=GILT1 PE=2 SV=1	INVnr_XP_001844008.1_conserved_hypothetical_protein_[Culex_quinquefasciatus]
CPIJ011298	brachyurin	24.7581	-1.00611	0.329597	-3.05253	0.00226919	0.00830348		venom serine protease-like	SP34_APIMEVenom serine protease 34 OS=Apis mellifera OX=7460 PE=2 SV=1	INVnr_XP_001861527.1_brachyurin_[Culex_quinquefasciatus]
CPIJ009741	n-acetylglucosamine-6-phosphate deacetylase	12.2525	-1.00839	0.419813	-2.40199	0.0163059	0.0442868	cqu00520	N-acetylglucosamine-6-phosphate deacetylase	NAGA_DROMEN-acetylglucosamine-6-phosphate deacetylase OS=Drosophila melanogaster OX=7227 GN=CG17065 PE=2 SV=1	INVnr_XP_001851539.1_N-acetylglucosamine-6-phosphate_deacetylase_[Culex_quinquefasciatus]
CPIJ017085	2-oxoglutarate dehydrogenase E1 component	329.839	-1.00939	0.136552	-7.39202	1.45e-13	4.23e-12		probable 2-oxoglutarate dehydrogenase E1 component DHKTD1 mitochondrial	DHTK1_DROMEProbable 2-oxoglutarate dehydrogenase E1 component DHKTD1 mitochondrial OS=Drosophila melanogaster OX=7227 GN=CG1544 PE=2 SV=2	INVnr_XP_001867443.1_2-oxoglutarate_dehydrogenase_E1_component_[Culex_quinquefasciatus]
CPIJ016134	ubiquitin carboxyl-terminal hydrolase 64E	14.8427	-1.01044	0.391433	-2.5814	0.00984013	0.028803		ubiquitin carboxyl-terminal hydrolase 64E isoform X1	UBPE_DROMEUbiquitin carboxyl-terminal hydrolase 47 OS=Drosophila melanogaster OX=7227 GN=Usp47 PE=1 SV=2	INVnr_XP_001866927.1_ubiquitin_carboxyl-terminal_hydrolase_64E_[Culex_quinquefasciatus]
CPIJ015382	charged multivesicular body protein 5	19.7037	-1.01138	0.355724	-2.84315	0.00446701	0.0147036	cqu04144	charged multivesicular body 5	CHMP5_DROMECharged multivesicular body 5 OS=Drosophila melanogaster OX=7227 GN=Vps60 PE=1 SV=2	INVnr_XP_001865745.1_charged_multivesicular_body_protein_5_[Culex_quinquefasciatus]
CPIJ001733	conserved hypothetical protein	36.0013	-1.01214	0.286954	-3.52719	0.000419997	0.0019349		ribonuclease H1	RNH1_HUMANRibonuclease H1 OS=Homo sapiens OX=9606 GN=RNASEH1 PE=1 SV=2	INVnr_XP_011493451.1_ribonuclease_H1_[Aedes_aegypti]
CPIJ001097	conserved hypothetical protein	35.0761	-1.01226	0.290606	-3.48327	0.000495327	0.00223087		conserved hypothetical protein	SICK_DROME sickie OS=Drosophila melanogaster OX=7227 GN=sick PE=3 SV=3	INVnr_XP_001842766.1_conserved_hypothetical_protein_[Culex_quinquefasciatus]
CPIJ009505	conserved hypothetical protein	74.0642	-1.01246	0.218727	-4.62889	3.68e-06	2.87e-05		intracellular transport USO1-like	---NA---	INVnr_XP_001851132.1_conserved_hypothetical_protein_[Culex_quinquefasciatus]
CPIJ011538	rho-associated protein kinase 1	138.21	-1.01309	0.195439	-5.18368	2.18e-07	2.23e-06	cqu04350	rho-associated kinase 1	ROCK2_HUMANRho-associated kinase 2 OS=Homo sapiens OX=9606 GN=ROCK2 PE=1 SV=4	INVnr_XP_001861861.1_rho-associated_protein_kinase_1_[Culex_quinquefasciatus]
CPIJ000802	conserved hypothetical protein	18.4115	-1.01517	0.373649	-2.7169	0.00658963	0.0205387		cholinephosphotransferase 1 isoform X5	CEPT1_CHICKCholine ethanolaminephosphotransferase 1 OS=Gallus gallus OX=9031 GN=CEPT1 PE=2 SV=2	INVnr_XP_001842425.1_conserved_hypothetical_protein_[Culex_quinquefasciatus]
CPIJ005876	huntingtin interacting protein, putative	25.2539	-1.01648	0.329273	-3.08703	0.00202165	0.00752271	cqu00310	probable histone-lysine N-methyltransferase CG1716	C1716_DROMEProbable histone-lysine N-methyltransferase CG1716 OS=Drosophila melanogaster OX=7227 GN=Set2 PE=1 SV=2	INVnr_XP_001847701.1_huntingtin_interacting_protein_[Culex_quinquefasciatus]
CPIJ007400	dalao	26.948	-1.01659	0.322105	-3.15607	0.0015991	0.0061485		SWI SNF-related matrix-associated actin-dependent regulator of chromatin subfamily E member 1	SMCE1_RATSWI SNF-related matrix-associated actin-dependent regulator of chromatin subfamily E member 1 OS=Rattus norvegicus OX=10116 GN=Smarce1 PE=1 SV=1	INVnr_XP_001849025.1_dalao_[Culex_quinquefasciatus]
CPIJ011266	conserved hypothetical protein	39.7448	-1.01825	0.273106	-3.72841	0.000192691	0.000977187		CD63 antigen isoform X1	---NA---	INVnr_XP_001861548.1_conserved_hypothetical_protein_[Culex_quinquefasciatus]
CPIJ002368	polyA-binding protein interacting protein, putative	24.1504	-1.01996	0.33559	-3.03932	0.00237112	0.00862174		polyadenylate-binding -interacting 2	PAI2B_HUMANPolyadenylate-binding -interacting 2B OS=Homo sapiens OX=9606 GN=PAIP2B PE=1 SV=2	INVnr_XP_001844112.1_polyA-binding_protein_interacting_protein_[Culex_quinquefasciatus]
CPIJ015894	exosome complex exonuclease RRP44	27.9674	-1.02049	0.322407	-3.16522	0.00154967	0.00598129		DIS3-like exonuclease 2	DI3L2_HUMANDIS3-like exonuclease 2 OS=Homo sapiens OX=9606 GN=DIS3L2 PE=1 SV=4	INVnr_XP_001866127.1_exosome_complex_exonuclease_RRP44_[Culex_quinquefasciatus]
CPIJ006409	alanine-glyoxylate aminotransferase	87.217	-1.02126	0.210789	-4.84493	1.27e-06	1.1e-05	cqu00564,cqu01100	alanine-glyoxylate aminotransferase	AGT2L_DROMEAlanine--glyoxylate aminotransferase 2-like OS=Drosophila melanogaster OX=7227 GN=CG8745 PE=2 SV=2	INVnr_XP_001848282.1_alanine-glyoxylate_aminotransferase_[Culex_quinquefasciatus]
CPIJ000863	6-pyruvoyl tetrahydrobiopterin synthase	46.2918	-1.02197	0.26463	-3.8619	0.00011251	0.000611516	cqu00790,cqu01100	6-pyruvoyl tetrahydrobiopterin synthase	PTPS_DROME6-pyruvoyl tetrahydrobiopterin synthase OS=Drosophila melanogaster OX=7227 GN=pr PE=1 SV=1	INVnr_XP_001842486.1_6-pyruvoyl_tetrahydrobiopterin_synthase_[Culex_quinquefasciatus]
CPIJ005794	tensin	54.3819	-1.02256	0.24581	-4.15998	3.18e-05	0.000199992		tensin-1-like isoform X7	TENS1_BOVINTensin-1 OS=Bos taurus OX=9913 GN=TNS1 PE=2 SV=1	INVnr_XP_001847278.1_tensin_[Culex_quinquefasciatus]
CPIJ019667	conserved hypothetical protein	17.4013	-1.02335	0.384461	-2.66177	0.0077731	0.0236619		short-chain dehydrogenase	---NA---	INVnr_XP_001869880.1_conserved_hypothetical_protein_[Culex_quinquefasciatus]
CPIJ001749	ring canal kelch protein	29.2723	-1.02514	0.323243	-3.17144	0.00151686	0.00586752		ring canal kelch	KELC_ANOSTRing canal kelch homolog OS=Anopheles stephensi OX=30069 GN=kel PE=2 SV=2	INVnr_XP_001843614.1_ring_canal_kelch_protein_[Culex_quinquefasciatus]
CPIJ014181	conserved hypothetical protein	916.474	-1.02648	0.285251	-3.59853	0.000320019	0.00152415		conserved hypothetical protein	---NA---	INVnr_XP_001864210.1_conserved_hypothetical_protein_[Culex_quinquefasciatus]
CPIJ018451	conserved hypothetical protein	14.6799	-1.02781	0.413441	-2.48598	0.0129196	0.0361708		conserved hypothetical protein	XMAS2_DROME xmas-2 OS=Drosophila melanogaster OX=7227 GN=xmas-2 PE=1 SV=3	INVnr_XP_001868605.1_conserved_hypothetical_protein_[Culex_quinquefasciatus]
CPIJ010681	B0WTU5: Coiled-coil domain-containing protein 22 homolog	52.6277	-1.02809	0.250829	-4.09876	4.15e-05	0.000255088		coiled-coil domain-containing 22 homolog	CCD22_CULQUCoiled-coil domain-containing 22 homolog OS=Culex quinquefasciatus OX=7176 GN=CPIJ010681 PE=3 SV=1	INVnr_XP_001855886.1_conserved_hypothetical_protein_[Culex_quinquefasciatus]
CPIJ019590	predicted protein	37.1458	-1.02925	0.278919	-3.69015	0.000224121	0.00111255		predicted protein	---NA---	INVnr_XP_001869821.1_predicted_protein_[Culex_quinquefasciatus]
CPIJ009095	luciferin 4-monooxygenase	74.1038	-1.0293	0.228927	-4.49622	6.92e-06	5.11e-05		luciferin 4-monooxygenase	LUCI_PHOPELuciferin 4-monooxygenase OS=Photuris pensylvanica OX=1710587 PE=2 SV=2	INVnr_XP_001850634.1_luciferin_4-monooxygenase_[Culex_quinquefasciatus]
CPIJ002118	iron-responsive element-binding protein 1	852.593	-1.03167	0.113165	-9.11651	7.76e-20	4.79e-18	cqu00020,cqu00630,cqu01100,cqu01200,cqu01210,cqu01230	iron-responsive element-binding 1	ACOC_MOUSECytoplasmic aconitate hydratase OS=Mus musculus OX=10090 GN=Aco1 PE=1 SV=3	INVnr_XP_001843386.1_iron-responsive_element-binding_protein_1_[Culex_quinquefasciatus]
CPIJ008310	conserved hypothetical protein	14.3119	-1.03219	0.399914	-2.58104	0.00985042	0.0288149		general transcriptional corepressor trfA-like	---NA---	INVnr_XP_001849426.1_conserved_hypothetical_protein_[Culex_quinquefasciatus]
CPIJ017721	gamma-glutamyltranspeptidase precursor	45.7205	-1.03239	0.309911	-3.33124	0.000864585	0.00361862	cqu00430,cqu00480,cqu00590,cqu01100	gamma-glutamyltranspeptidase 1	GGT1_PIGGlutathione hydrolase 1 proenzyme OS=Sus scrofa OX=9823 GN=GGT1 PE=2 SV=1	INVnr_XP_001867919.1_gamma-glutamyltranspeptidase_[Culex_quinquefasciatus]
CPIJ012812	thyroid hormone receptor interactor 12	89.5797	-1.03319	0.204727	-5.04664	4.5e-07	4.34e-06	cqu04120	E3 ubiquitin- ligase TRIP12	TRIPC_XENTRE3 ubiquitin- ligase TRIP12 OS=Xenopus tropicalis OX=8364 GN=trip12 PE=2 SV=1	INVnr_XP_001863312.1_thyroid_hormone_receptor_interactor_12_[Culex_quinquefasciatus]
CPIJ005860	conserved hypothetical protein	20.8106	-1.03448	0.35804	-2.88929	0.00386115	0.0130321		conserved hypothetical protein	---NA---	INVnr_XP_001847685.1_conserved_hypothetical_protein_[Culex_quinquefasciatus]
CPIJ005603	conserved hypothetical protein	11.201	-1.03461	0.432419	-2.39262	0.0167288	0.0451312		polycomb Sfmbt	SMBT_DROMEPolycomb Sfmbt OS=Drosophila melanogaster OX=7227 GN=Sfmbt PE=1 SV=2	INVnr_XP_001847055.1_conserved_hypothetical_protein_[Culex_quinquefasciatus]
CPIJ008984	conserved hypothetical protein	135	-1.03678	0.202691	-5.11506	3.14e-07	3.12e-06	cqu00760,cqu01100	NAD kinase mitochondrial	NAKD2_RATNAD kinase mitochondrial OS=Rattus norvegicus OX=10116 GN=Nadk2 PE=1 SV=1	INVnr_XP_001850611.1_conserved_hypothetical_protein_[Culex_quinquefasciatus]
CPIJ014125	short-chain dehydrogenase	635.848	-1.03781	0.140713	-7.37537	1.64e-13	4.73e-12		short-chain dehydrogenase	DHB13_MOUSE17-beta-hydroxysteroid dehydrogenase 13 OS=Mus musculus OX=10090 GN=Hsd17b13 PE=1 SV=2	INVnr_XP_001864567.1_short-chain_dehydrogenase_[Culex_quinquefasciatus]
CPIJ017954	conserved hypothetical protein	65.913	-1.03964	0.23057	-4.509	6.51e-06	4.83e-05		conserved hypothetical protein	NPA1P_HUMANNucleolar pre-ribosomal-associated 1 OS=Homo sapiens OX=9606 GN=URB1 PE=1 SV=4	INVnr_XP_001868235.1_conserved_hypothetical_protein_[Culex_quinquefasciatus]
CPIJ004020	saccharopine dehydrogenase domain-containing protein, putative	80.2193	-1.04136	0.214681	-4.85074	1.23e-06	1.07e-05		saccharopine dehydrogenase domain-containing	SCPDL_HUMANSaccharopine dehydrogenase-like oxidoreductase OS=Homo sapiens OX=9606 GN=SCCPDH PE=1 SV=1	INVnr_XP_001845606.1_saccharopine_dehydrogenase_domain-containing_protein_[Culex_quinquefasciatus]
CPIJ004151	nuclear hormone receptor FTZ-F1 beta	21.4981	-1.04237	0.346648	-3.00699	0.00263852	0.00945357		nuclear hormone receptor FTZ-F1 beta	FTF1B_DROMENuclear hormone receptor FTZ-F1 beta OS=Drosophila melanogaster OX=7227 GN=Hr39 PE=1 SV=3	INVnr_XP_001845875.1_nuclear_hormone_receptor_FTZ-F1_beta_[Culex_quinquefasciatus]
CPIJ001881	conserved hypothetical protein	13.0477	-1.04375	0.408068	-2.55778	0.0105342	0.0303848		zinc finger FYVE domain-containing 26 homolog	ZFY26_DROMEZinc finger FYVE domain-containing 26 homolog OS=Drosophila melanogaster OX=7227 GN=CG5270 PE=1 SV=3	INVnr_XP_001843658.1_conserved_hypothetical_protein_[Culex_quinquefasciatus]
CPIJ004801	hypothetical protein	37.4864	-1.04498	0.297713	-3.51003	0.000448054	0.00204851		hypothetical protein CpipJ_CPIJ004801	---NA---	INVnr_XP_001846411.1_hypothetical_protein_CpipJ_CPIJ004801_[Culex_quinquefasciatus]
CPIJ010965	pnuts protein	68.174	-1.04518	0.226075	-4.62314	3.78e-06	2.95e-05		muscle M-line assembly unc-89-like	PP1RA_PIGSerine threonine- phosphatase 1 regulatory subunit 10 OS=Sus scrofa OX=9823 GN=PPP1R10 PE=3 SV=1	INVnr_XP_001861779.1_pnuts_protein_[Culex_quinquefasciatus]
CPIJ010570	mitochondrial intermediate peptidase	32.8957	-1.04552	0.306337	-3.41297	0.0006426	0.00280103		mitochondrial intermediate peptidase	MIPEP_HUMANMitochondrial intermediate peptidase OS=Homo sapiens OX=9606 GN=MIPEP PE=1 SV=2	INVnr_XP_001870806.1_mitochondrial_intermediate_peptidase_[Culex_quinquefasciatus]
CPIJ018694	ion channel nompc	32.9361	-1.04611	0.297685	-3.51416	0.000441151	0.00202177		ion channel nompc	ANK3_HUMANAnkyrin-3 OS=Homo sapiens OX=9606 GN=ANK3 PE=1 SV=3	INVnr_XP_001868943.1_ion_channel_nompc_[Culex_quinquefasciatus]
CPIJ012884	otopetrin, putative	190.2	-1.04799	0.165595	-6.32861	2.47e-10	4.39e-09		otopetrin-2 isoform X4	OTOP_DROMEProton channel c OS=Drosophila melanogaster OX=7227 GN=CG42265 PE=3 SV=2	INVnr_XP_001863225.1_otopetrin_[Culex_quinquefasciatus]
CPIJ010259	voltage and ligand gated potassium channel	14.6007	-1.05027	0.412355	-2.547	0.0108652	0.0311123		voltage and ligand gated potassium	KCNH8_HUMANPotassium voltage-gated channel subfamily H member 8 OS=Homo sapiens OX=9606 GN=KCNH8 PE=2 SV=2	INVnr_XP_001853758.1_voltage_and_ligand_gated_potassium_channel,_partial_[Culex_quinquefasciatus]
CPIJ003439	intron-binding protein aquarius	15.0915	-1.05221	0.393913	-2.67117	0.00755865	0.023099	cqu03040	intron-binding aquarius	AQR_HUMANRNA helicase aquarius OS=Homo sapiens OX=9606 GN=AQR PE=1 SV=4	INVnr_XP_001845209.1_intron-binding_protein_aquarius_[Culex_quinquefasciatus]
CPIJ006032	coracle	245.536	-1.05317	0.152007	-6.92845	4.25e-12	9.79e-11		homolog isoform X1	41_DROME homolog OS=Drosophila melanogaster OX=7227 GN=cora PE=1 SV=1	INVnr_XP_001847375.1_coracle_[Culex_quinquefasciatus]
CPIJ005048	conserved hypothetical protein	30.0576	-1.05376	0.301625	-3.49361	0.000476533	0.00216282		conserved hypothetical protein	TDR12_BOMMO ATP-dependent RNA helicase TDRD12 OS=Bombyx mori OX=7091 GN=TDRD12 PE=1 SV=2	INVnr_XP_001846889.1_conserved_hypothetical_protein_[Culex_quinquefasciatus]
CPIJ019673	CYP6AG15: cytochrome P450 6AG15	147.455	-1.05407	0.175757	-5.99731	2.01e-09	3.1e-08		cytochrome P450 6A1	C28D1_DROMEProbable cytochrome P450 28d1 OS=Drosophila melanogaster OX=7227 GN=Cyp28d1 PE=2 SV=1	INVnr_XP_001869908.1_cytochrome_P450_6A1_[Culex_quinquefasciatus]
CPIJ012311	histone deacetylase	240.322	-1.05468	0.16022	-6.58267	4.62e-11	9.25e-10		histone deacetylase	HDAC6_HUMANHistone deacetylase 6 OS=Homo sapiens OX=9606 GN=HDAC6 PE=1 SV=2	INVnr_XP_001862395.1_histone_deacetylase_[Culex_quinquefasciatus]
CPIJ008743	valyl-tRNA synthetase	27.0034	-1.05778	0.318276	-3.32345	0.00088912	0.00371028	cqu00970	valyl-tRNA synthetase	SYVC_RATValine--tRNA ligase OS=Rattus norvegicus OX=10116 GN=Vars PE=2 SV=2	INVnr_XP_001850398.1_valyl-tRNA_synthetase_[Culex_quinquefasciatus]
CPIJ002582	conserved hypothetical protein	78.9929	-1.06074	0.217134	-4.88517	1.03e-06	9.14e-06	cqu00230,cqu01100	AMP deaminase 2 isoform X1	AMPD2_RATAMP deaminase 2 OS=Rattus norvegicus OX=10116 GN=Ampd2 PE=1 SV=2	INVnr_XP_001844651.1_conserved_hypothetical_protein_[Culex_quinquefasciatus]
CPIJ002961	conserved hypothetical protein	11.703	-1.06134	0.427276	-2.48397	0.0129928	0.0363035		conserved hypothetical protein	---NA---	INVnr_XP_001844579.1_conserved_hypothetical_protein_[Culex_quinquefasciatus]
CPIJ008596	phosphatidylinositol 4-kinase beta	13.0357	-1.06235	0.408318	-2.60177	0.00927434	0.027472	cqu00562,cqu01100,cqu04070	phosphatidylinositol 4-kinase beta	PI4KB_DANREPhosphatidylinositol 4-kinase beta OS=Danio rerio OX=7955 GN=pi4kb PE=2 SV=2	INVnr_XP_001850338.1_phosphatidylinositol_4-kinase_beta_[Culex_quinquefasciatus]
CPIJ003184	l-asparaginase	698.437	-1.06279	0.129881	-8.18284	2.77e-16	1.13e-14		isoaspartyl peptidase L-asparaginase	ASGL1_DROPSProbable isoaspartyl peptidase L-asparaginase GA20639 OS=Drosophila pseudoobscura pseudoobscura OX=46245 GN=GA20639 PE=3 SV=1	INVnr_XP_001844772.1_l-asparaginase_[Culex_quinquefasciatus]
CPIJ007753	5-3 exoribonuclease 1	38.4802	-1.06363	0.283123	-3.75678	0.000172111	0.000880427	cqu03008,cqu03018	5 -3 exoribonuclease 1	XRN1_HUMAN5 -3 exoribonuclease 1 OS=Homo sapiens OX=9606 GN=XRN1 PE=1 SV=1	INVnr_XP_001849256.1_5-3_exoribonuclease_1_[Culex_quinquefasciatus]
CPIJ012920	F-box only protein 9	283.99	-1.06385	0.160994	-6.60802	3.89e-11	7.88e-10		F-box only 9	FBX9_BOVINF-box only 9 OS=Bos taurus OX=9913 GN=FBXO9 PE=2 SV=2	INVnr_XP_001863207.1_F-box_only_protein_9_[Culex_quinquefasciatus]
CPIJ008049	hexokinase	156.892	-1.06971	0.193197	-5.53687	3.08e-08	3.83e-07	cqu00010,cqu00051,cqu00052,cqu00500,cqu00520,cqu01100,cqu01200	hexokinase type 2 isoform X1	HXK2_DROMEHexokinase type 2 OS=Drosophila melanogaster OX=7227 GN=Hex-t2 PE=2 SV=4	INVnr_XP_001850122.1_hexokinase_[Culex_quinquefasciatus]
CPIJ006765	conserved hypothetical protein	10.537	-1.07043	0.440287	-2.43122	0.0150481	0.0413089		zinc finger E-box-binding homeobox 1-like	ZKSC1_HUMANZinc finger with KRAB and SCAN domains 1 OS=Homo sapiens OX=9606 GN=ZKSCAN1 PE=1 SV=3	INVnr_XP_001848156.1_conserved_hypothetical_protein_[Culex_quinquefasciatus]
CPIJ016476	APG1: autophagy related gene	13.1766	-1.07051	0.411617	-2.60076	0.00930188	0.027542		calcium-dependent kinase	ULK3_XENLASerine threonine- kinase ULK3 OS=Xenopus laevis OX=8355 GN=ulk3 PE=2 SV=1	INVnr_XP_001866612.1_calcium-dependent_protein_kinase_[Culex_quinquefasciatus]
CPIJ001380	CYP314A1: cytochrome P450 314A1	145.852	-1.07093	0.179049	-5.98119	2.22e-09	3.4e-08	cqu00981	ecdysone 20-monooxygenase	CP314_DROMEEcdysone 20-monooxygenase OS=Drosophila melanogaster OX=7227 GN=shd PE=1 SV=3	INVnr_XP_001843278.1_cytochrome_P450_[Culex_quinquefasciatus]
CPIJ013392	conserved hypothetical protein	35.6046	-1.07135	0.283742	-3.77581	0.00015949	0.000823039		zinc finger CCCH domain-containing 14	ZC3HE_CHICKZinc finger CCCH domain-containing 14 OS=Gallus gallus OX=9031 GN=ZC3H14 PE=2 SV=1	INVnr_XP_001863574.1_conserved_hypothetical_protein_[Culex_quinquefasciatus]
CPIJ010172	poly(adp-ribose) glycohydrolase	22.9295	-1.0714	0.335977	-3.18889	0.0014282	0.00556794		poly(adp-ribose) glycohydrolase	PARG_DROMEPoly(ADP-ribose) glycohydrolase OS=Drosophila melanogaster OX=7227 GN=Parg PE=1 SV=3	INVnr_XP_001853435.1_poly(adp-ribose)_glycohydrolase_[Culex_quinquefasciatus]
CPIJ014325	hypothetical protein	9.75507	-1.07226	0.451426	-2.37527	0.017536	0.0469137		hypothetical protein CpipJ_CPIJ014325	---NA---	INVnr_XP_001864799.1_hypothetical_protein_CpipJ_CPIJ014325_[Culex_quinquefasciatus]
CPIJ010666	conserved hypothetical protein	10.2945	-1.07337	0.446184	-2.40567	0.0161427	0.0439342		conserved hypothetical protein	ANK2_HUMANAnkyrin-2 OS=Homo sapiens OX=9606 GN=ANK2 PE=1 SV=4	INVnr_XP_001855811.1_conserved_hypothetical_protein_[Culex_quinquefasciatus]
CPIJ016694	kuzbanian	11.8284	-1.07446	0.430663	-2.49489	0.0125997	0.0353877		disintegrin and metallo ase domain-containing 10-like isoform X1	ADA10_CAEELDisintegrin and metallo ase domain-containing 10 homolog OS=Caenorhabditis elegans OX=6239 GN=sup-17 PE=1 SV=1	INVnr_XP_001867334.1_kuzbanian_[Culex_quinquefasciatus]
CPIJ007837	zinc finger protein	59.5595	-1.07485	0.27452	-3.91536	9.03e-05	0.000503294		zinc finger	GLIS2_DROMEZinc finger GLIS2 homolog OS=Drosophila melanogaster OX=7227 GN=sug PE=2 SV=1	INVnr_XP_001849501.1_zinc_finger_protein_[Culex_quinquefasciatus]
CPIJ004168	conserved hypothetical protein	37.5773	-1.07525	0.291605	-3.68734	0.000226608	0.00112331		conserved hypothetical protein	---NA---	INVnr_XP_001845892.1_conserved_hypothetical_protein_[Culex_quinquefasciatus]
CPIJ000348	pregnancy zone protein precursor	68.1222	-1.07758	0.252695	-4.26435	2e-05	0.000132479		CD109 antigen	CD109_MOUSECD109 antigen OS=Mus musculus OX=10090 GN=Cd109 PE=1 SV=1	INVnr_XP_001842018.1_pregnancy_zone_protein_[Culex_quinquefasciatus]
CPIJ014397	xaa-pro dipeptidase	228.797	-1.07837	0.15776	-6.83552	8.17e-12	1.82e-10		xaa-pro dipeptidase	PEPD_HUMANXaa-Pro dipeptidase OS=Homo sapiens OX=9606 GN=PEPD PE=1 SV=3	INVnr_XP_001864675.1_xaa-pro_dipeptidase_[Culex_quinquefasciatus]
CPIJ014438	sex-determining protein fem-1	9.82862	-1.07963	0.452765	-2.38453	0.0171011	0.0459772		sex-determining fem-1	FEM1A_DROME fem-1 homolog CG6966 OS=Drosophila melanogaster OX=7227 GN=CG6966 PE=2 SV=2	INVnr_XP_001864882.1_sex-determining_protein_fem-1_[Culex_quinquefasciatus]
CPIJ009203	melanoma receptor tyrosine-protein kinase precursor	15.4229	-1.08013	0.398917	-2.70766	0.00677601	0.0210358	cqu04013,cqu04068,cqu04144,cqu04214,cqu04320	melanoma receptor tyrosine- kinase	EGFR_DROMEEpidermal growth factor receptor OS=Drosophila melanogaster OX=7227 GN=Egfr PE=1 SV=3	INVnr_XP_001850827.1_melanoma_receptor_tyrosine-protein_kinase_[Culex_quinquefasciatus]
CPIJ000973	conserved hypothetical protein	18.5713	-1.08014	0.371381	-2.90845	0.00363231	0.0123544		conserved hypothetical protein	---NA---	INVnr_XP_001842643.1_conserved_hypothetical_protein_[Culex_quinquefasciatus]
CPIJ009168	n-acetylglucosaminyltransferase vi	56.7344	-1.08077	0.255513	-4.22982	2.34e-05	0.000152402	cqu00510,cqu01100	alpha-1,3-mannosyl-glyco 4-beta-N-acetylglucosaminyltransferase A-like	MGT4B_DANREAlpha-1,3-mannosyl-glyco 4-beta-N-acetylglucosaminyltransferase B OS=Danio rerio OX=7955 GN=mgat4b PE=2 SV=1	INVnr_XP_001850656.1_N-acetylglucosaminyl_transferase_VI_[Culex_quinquefasciatus]
CPIJ015984	membrane protein tms1d	71.2194	-1.08124	0.223694	-4.83355	1.34e-06	1.16e-05		membrane tms1d	SERC1_RATSerine incorporator 1 OS=Rattus norvegicus OX=10116 GN=Serinc1 PE=1 SV=1	INVnr_XP_001866160.1_membrane_protein_tms1d_[Culex_quinquefasciatus]
CPIJ000263	DNA repair protein RAD16	12.5907	-1.08266	0.415619	-2.60494	0.00918896	0.0272556		DNA repair RAD16	SHPRH_MOUSEE3 ubiquitin- ligase SHPRH OS=Mus musculus OX=10090 GN=Shprh PE=1 SV=1	INVnr_XP_001841836.1_DNA_repair_protein_RAD16_[Culex_quinquefasciatus]
CPIJ012750	gamma-tubulin complex component 3	17.3851	-1.08499	0.3722	-2.91508	0.003556	0.0121359		gamma-tubulin complex component 3	GCP3_DROMEGamma-tubulin complex component 3 OS=Drosophila melanogaster OX=7227 GN=Grip91 PE=1 SV=2	INVnr_XP_001863041.1_gamma-tubulin_complex_component_3_[Culex_quinquefasciatus]
CPIJ005381	conserved hypothetical protein	10.4415	-1.08508	0.440196	-2.465	0.0137012	0.0379666	cqu04330	conserved hypothetical protein	HLES_DROME hairless OS=Drosophila melanogaster OX=7227 GN=H PE=1 SV=2	INVnr_XP_001847330.1_conserved_hypothetical_protein_[Culex_quinquefasciatus]
CPIJ007323	formin 3	66.1106	-1.08556	0.225947	-4.80448	1.55e-06	1.33e-05		formin 3	FHDC1_HUMANFH2 domain-containing 1 OS=Homo sapiens OX=9606 GN=FHDC1 PE=1 SV=2	INVnr_XP_001848691.1_formin_3_[Culex_quinquefasciatus]
CPIJ012916	conserved hypothetical protein	9.90959	-1.08699	0.451133	-2.40946	0.015976	0.0435507		KAT8 regulatory NSL complex subunit 2 isoform X1	KANL2_BOVINKAT8 regulatory NSL complex subunit 2 OS=Bos taurus OX=9913 GN=KANSL2 PE=2 SV=1	INVnr_XP_001863203.1_conserved_hypothetical_protein_[Culex_quinquefasciatus]
CPIJ004192	conserved hypothetical protein	36.1522	-1.08721	0.302822	-3.59025	0.000330366	0.00156707		furry isoform X3	FRY_DROME furry OS=Drosophila melanogaster OX=7227 GN=fry PE=1 SV=2	INVnr_XP_001846205.1_conserved_hypothetical_protein_[Culex_quinquefasciatus]
CPIJ002810	PR domain zinc finger protein 1	26.1358	-1.08836	0.329149	-3.3066	0.000944373	0.00390166		PR domain zinc finger 1	ZFP26_MOUSEZinc finger 26 OS=Mus musculus OX=10090 GN=Zfp26 PE=2 SV=2	INVnr_XP_001844966.1_PR_domain_zinc_finger_protein_1_[Culex_quinquefasciatus]
CPIJ001519	conserved hypothetical protein	47.3577	-1.08913	0.261603	-4.16329	3.14e-05	0.000197464		conserved hypothetical protein	---NA---	INVnr_XP_001843820.1_conserved_hypothetical_protein_[Culex_quinquefasciatus]
CPIJ010005	RING finger protein 126-B	54.9288	-1.08934	0.25239	-4.31611	1.59e-05	0.000108604		RING finger 126-B	RN126_XENTRE3 ubiquitin- ligase RNF126 OS=Xenopus tropicalis OX=8364 GN=rnf126 PE=2 SV=1	INVnr_XP_001870705.1_RING_finger_protein_126-B_[Culex_quinquefasciatus]
CPIJ019873	mitochondrial brown fat uncoupling protein	33.3701	-1.09091	0.326145	-3.34485	0.000823268	0.00348504		mitochondrial brown fat uncoupling	UCP2_RATMitochondrial uncoupling 2 OS=Rattus norvegicus OX=10116 GN=Ucp2 PE=2 SV=1	INVnr_XP_001870223.1_mitochondrial_brown_fat_uncoupling_protein_[Culex_quinquefasciatus]
CPIJ014044	conserved hypothetical protein	55.4792	-1.09176	0.245374	-4.44937	8.61e-06	6.24e-05		conserved hypothetical protein	SPNF_DROME spindle-F OS=Drosophila melanogaster OX=7227 GN=spn-F PE=1 SV=1	INVnr_XP_001864142.1_conserved_hypothetical_protein_[Culex_quinquefasciatus]
CPIJ000533	conserved hypothetical protein	2066.34	-1.09213	0.113976	-9.58214	9.51e-22	6.97e-20		salivary secreted peptide	---NA---	INVnr_XP_001842203.1_conserved_hypothetical_protein_[Culex_quinquefasciatus]
CPIJ012681	ADAM metalloprotease	48.9904	-1.096	0.253219	-4.32826	1.5e-05	0.000103585		ADAM metalloprotease	ADA12_HUMANDisintegrin and metallo ase domain-containing 12 OS=Homo sapiens OX=9606 GN=ADAM12 PE=1 SV=3	INVnr_XP_001862944.1_ADAM_metalloprotease_[Culex_quinquefasciatus]
CPIJ017188	conserved hypothetical protein	12.998	-1.09658	0.427786	-2.56339	0.0103657	0.0300353		helicase conserved C-terminal domain containing	SECA3_MAGMM translocase subunit 3 OS=Magnetococcus marinus (strain ATCC BAA-1437 JCM 17883 MC-1) OX=156889 GN=secA3 PE=3 SV=1	INVnr_XP_001867329.1_conserved_hypothetical_protein_[Culex_quinquefasciatus]
CPIJ015473	max binding protein	33.6823	-1.09721	0.295183	-3.71705	0.00020156	0.00101341		mucin-5AC isoform X3	MNT_MOUSEMax-binding MNT OS=Mus musculus OX=10090 GN=Mnt PE=2 SV=2	INVnr_XP_001865579.1_max_binding_protein_[Culex_quinquefasciatus]
CPIJ010504	inhibitor of Bruton tyrosine kinase	42.5052	-1.09842	0.268416	-4.09223	4.27e-05	0.000261697		inhibitor of Bruton tyrosine kinase	IBTK_HUMANInhibitor of Bruton tyrosine kinase OS=Homo sapiens OX=9606 GN=IBTK PE=1 SV=3	INVnr_XP_001853623.1_inhibitor_of_Bruton_tyrosine_kinase_[Culex_quinquefasciatus]
CPIJ011492	JmjC domain-containing histone demethylation protein 3C	16.3675	-1.10037	0.389972	-2.82168	0.00477731	0.015601		domain-containing histone demethylation 3C	KDM4B_DROMEProbable lysine-specific demethylase 4B OS=Drosophila melanogaster OX=7227 GN=Kdm4B PE=3 SV=3	INVnr_XP_001861505.1_JmjC_domain-containing_histone_demethylation_protein_3C_[Culex_quinquefasciatus]
CPIJ008729	4-aminobutyrate aminotransferase, mitochondrial precursor	35.8882	-1.10083	0.296138	-3.7173	0.000201363	0.00101341	cqu00250,cqu00280,cqu00410,cqu00640,cqu00650,cqu01100	4-aminobutyrate mitochondrial	GABT_PIG4-aminobutyrate mitochondrial OS=Sus scrofa OX=9823 GN=ABAT PE=1 SV=2	INVnr_XP_001850384.1_4-aminobutyrate_aminotransferase,_mitochondrial_[Culex_quinquefasciatus]
CPIJ000903	conserved hypothetical protein	19.6651	-1.10121	0.359168	-3.06599	0.00216952	0.00800947		Fanconi anemia group I	PLPL8_RABITCalcium-independent phospholipase A2-gamma OS=Oryctolagus cuniculus OX=9986 GN=PNPLA8 PE=1 SV=1	INVnr_XP_001842526.1_conserved_hypothetical_protein_[Culex_quinquefasciatus]
CPIJ017473	organic cation transporter	24.737	-1.10562	0.335719	-3.29327	0.000990278	0.00406736		organic cation transporter	S22A3_MOUSESolute carrier family 22 member 3 OS=Mus musculus OX=10090 GN=Slc22a3 PE=2 SV=1	INVnr_XP_001867672.1_organic_cation_transporter_[Culex_quinquefasciatus]
CPIJ002535	CYP6AG9: cytochrome P450 6AG9	15.0175	-1.10566	0.428507	-2.58027	0.00987219	0.0288666		cytochrome P450 6j1	C28A5_DROMEProbable cytochrome P450 28a5 OS=Drosophila melanogaster OX=7227 GN=Cyp28a5 PE=2 SV=1	INVnr_XP_001844204.1_cytochrome_P450_6j1_[Culex_quinquefasciatus]
CPIJ017353	cytoplasmic FMR1-interacting protein	17.0728	-1.10884	0.374371	-2.96189	0.00305761	0.0106994		cytoplasmic FMR1-interacting	CYFIP_DROMECytoplasmic FMR1-interacting OS=Drosophila melanogaster OX=7227 GN=Sra-1 PE=1 SV=1	INVnr_XP_001867531.1_cytoplasmic_FMR1-interacting_protein,_partial_[Culex_quinquefasciatus]
CPIJ005772	trithorax protein ash2	22.3871	-1.1124	0.356664	-3.11892	0.00181517	0.00685946		trithorax ash2	ASH2_DROMESet1 Ash2 histone methyltransferase complex subunit ASH2 OS=Drosophila melanogaster OX=7227 GN=ash2 PE=1 SV=2	INVnr_XP_001847256.1_trithorax_protein_ash2_[Culex_quinquefasciatus]
CPIJ017419	fibulin 1 and	104.487	-1.12073	0.195376	-5.73631	9.68e-09	1.33e-07		fibulin-1 isoform X1	FBLN2_MOUSEFibulin-2 OS=Mus musculus OX=10090 GN=Fbln2 PE=1 SV=2	INVnr_XP_001867489.1_fibulin_1_[Culex_quinquefasciatus]
CPIJ014208	monocarboxylate transporter	305.831	-1.12094	0.205134	-5.46441	4.64e-08	5.47e-07		monocarboxylate transporter	MOT4_CHICKMonocarboxylate transporter 4 OS=Gallus gallus OX=9031 GN=SLC16A3 PE=2 SV=1	INVnr_XP_001864440.1_monocarboxylate_transporter_[Culex_quinquefasciatus]
CPIJ007441	conserved hypothetical protein	10.2956	-1.12156	0.447464	-2.50649	0.0121936	0.0345086		conserved hypothetical protein	CUO6_BLACRCuticle 6 OS=Blaberus craniifer OX=6982 PE=1 SV=1	INVnr_XP_001849366.1_conserved_hypothetical_protein_[Culex_quinquefasciatus]
CPIJ001476	shwachman-Bodian-Diamond syndrome protein	78.9256	-1.12261	0.231351	-4.85241	1.22e-06	1.07e-05	cqu03008	shwachman-Bodian-Diamond syndrome	SBDS_XENTRRibosome maturation SBDS OS=Xenopus tropicalis OX=8364 GN=sbds PE=2 SV=1	INVnr_XP_001843777.1_shwachman-Bodian-Diamond_syndrome_protein_[Culex_quinquefasciatus]
CPIJ010405	protein phosphatase methylesterase 1	17.9121	-1.12327	0.373244	-3.00947	0.00261704	0.00938616		phosphatase methylesterase 1	PPME1_BOVIN phosphatase methylesterase 1 OS=Bos taurus OX=9913 GN=PPME1 PE=2 SV=3	INVnr_XP_001870917.1_phosphatase_methylesterase_1_[Culex_quinquefasciatus]
CPIJ018423	zinc finger protein	13.6144	-1.12431	0.405627	-2.77178	0.00557504	0.0177776		zinc finger	ZNF81_HUMANZinc finger 81 OS=Homo sapiens OX=9606 GN=ZNF81 PE=1 SV=3	INVnr_XP_001869125.1_zinc_finger_protein_[Culex_quinquefasciatus]
CPIJ015674	ezrin-binding protein pace-1	40.1281	-1.12495	0.276608	-4.06693	4.76e-05	0.000287283		ezrin-binding pace-1	PACE1_HUMAN -associating with the carboxyl-terminal domain of ezrin OS=Homo sapiens OX=9606 GN=SCYL3 PE=1 SV=3	INVnr_XP_001865663.1_ezrin-binding_protein_pace-1_[Culex_quinquefasciatus]
CPIJ003734	conserved hypothetical protein	14.0998	-1.12578	0.40233	-2.79816	0.00513943	0.0166123		conserved hypothetical protein	---NA---	INVnr_XP_001845307.1_conserved_hypothetical_protein_[Culex_quinquefasciatus]
CPIJ008322	conserved hypothetical protein	24.6005	-1.12751	0.346087	-3.25788	0.00112247	0.00452844		lin-54 homolog	LIN54_RAT lin-54 homolog OS=Rattus norvegicus OX=10116 GN=Lin54 PE=1 SV=2	INVnr_XP_001849706.1_conserved_hypothetical_protein_[Culex_quinquefasciatus]
CPIJ019182	ribonuclease UK114	10.1582	-1.12783	0.446813	-2.52417	0.0115971	0.0329662		AGAP005327	UK114_DROME family UK114 OS=Drosophila melanogaster OX=7227 GN=UK114 PE=2 SV=1	INVnr_XP_001869449.1_ribonuclease_UK114_[Culex_quinquefasciatus]
CPIJ001572	hypothetical protein	25.3933	-1.12845	0.326884	-3.45214	0.000556168	0.00246548		homeobox 5-like isoform X3	CRTC1_MOUSECREB-regulated transcription coactivator 1 OS=Mus musculus OX=10090 GN=Crtc1 PE=1 SV=1	INVnr_XP_001843056.1_hypothetical_protein_CpipJ_CPIJ001572_[Culex_quinquefasciatus]
CPIJ010230	CYP12F10: cytochrome P450 12F10	20.4486	-1.13015	0.357769	-3.15888	0.00158374	0.00609277		cytochrome P450 mitochondrial	C12B1_DROACCytochrome P450 mitochondrial OS=Drosophila acanthoptera OX=51166 GN=Cyp12b1 PE=2 SV=1	INVnr_XP_001855596.1_cytochrome_P450_[Culex_quinquefasciatus]
CPIJ007824	esterase B1 precursor	318.065	-1.13045	0.144444	-7.8262	5.03e-15	1.77e-13		esterase B1	EST6_APIMEVenom carboxylesterase-6 OS=Apis mellifera OX=7460 PE=2 SV=1	INVnr_XP_001849488.1_esterase_B1_[Culex_quinquefasciatus]
CPIJ015088	4-coumarate-CoA ligase 1	44.9816	-1.13098	0.267362	-4.23013	2.34e-05	0.000152328		4-coumarate-- ligase 1	LUCI_LUCMILuciferin 4-monooxygenase OS=Luciola mingrelica OX=27446 PE=1 SV=1	INVnr_XP_001865675.1_4-coumarate-CoA_ligase_1_[Culex_quinquefasciatus]
CPIJ012664	conserved hypothetical protein	10.6453	-1.13115	0.452901	-2.49757	0.0125048	0.0352053		RING finger 17-like	TDRD1_ORYLATudor domain-containing 1 OS=Oryzias latipes OX=8090 GN=tdrd1 PE=2 SV=1	INVnr_XP_001862963.1_conserved_hypothetical_protein_[Culex_quinquefasciatus]
CPIJ001759	CYP4H40: cytochrome P450 4H40	509.347	-1.13143	0.132265	-8.55426	1.19e-17	5.65e-16		cytochrome P450 4c21	C4D14_DROMEProbable cytochrome P450 4d14 OS=Drosophila melanogaster OX=7227 GN=Cyp4d14 PE=3 SV=1	INVnr_XP_001843624.1_cytochrome_P450_4c21_[Culex_quinquefasciatus]
CPIJ013632	conserved hypothetical protein	106.5	-1.1315	0.196777	-5.75019	8.91e-09	1.23e-07		acyl- -binding domain-containing 5	ACBD5_XENLAAcyl- -binding domain-containing 5 OS=Xenopus laevis OX=8355 GN=acbd5 PE=2 SV=1	INVnr_XP_001863706.1_conserved_hypothetical_protein_[Culex_quinquefasciatus]
CPIJ013403	conserved hypothetical protein	58.9543	-1.13181	0.235946	-4.79691	1.61e-06	1.38e-05		F-actin-methionine sulfoxide oxidase Mical-like	MCA3A_DANRE -methionine sulfoxide oxidase mical3a OS=Danio rerio OX=7955 GN=mical3a PE=2 SV=2	INVnr_XP_001863597.1_conserved_hypothetical_protein_[Culex_quinquefasciatus]
CPIJ013491	alpha-aspartyl dipeptidase	198.334	-1.13279	0.159114	-7.11936	1.08e-12	2.81e-11		probable alpha-aspartyl dipeptidase	PEPE_XENLAAlpha-aspartyl dipeptidase OS=Xenopus laevis OX=8355 GN=aad-a PE=1 SV=1	INVnr_XP_001863753.1_alpha-aspartyl_dipeptidase_[Culex_quinquefasciatus]
CPIJ006866	conserved hypothetical protein	41.4261	-1.13467	0.277903	-4.08298	4.45e-05	0.000271396		conserved hypothetical protein	---NA---	INVnr_XP_001848883.1_conserved_hypothetical_protein_[Culex_quinquefasciatus]
CPIJ016677	TPR repeat-containing protein	60.9648	-1.13688	0.240471	-4.72771	2.27e-06	1.88e-05		RNA polymerase-associated CTR9 homolog	CTR9_XENLARNA polymerase-associated CTR9 homolog OS=Xenopus laevis OX=8355 GN=ctr9 PE=2 SV=1	INVnr_XP_001866910.1_TPR_repeat-containing_protein_[Culex_quinquefasciatus]
CPIJ010980	anaphase-promoting complex subunit 8	12.1318	-1.13818	0.432679	-2.63055	0.00852467	0.0255088	cqu04120	anaphase-promoting complex subunit 8	CDC23_HUMANCell division cycle 23 homolog OS=Homo sapiens OX=9606 GN=CDC23 PE=1 SV=3	INVnr_XP_001861794.1_anaphase-promoting_complex_subunit_8_[Culex_quinquefasciatus]
CPIJ008283	multidrug resistance protein 2	16.2674	-1.1386	0.38616	-2.94853	0.00319289	0.0110901		multidrug resistance 2	L259_DROMEProbable multidrug resistance-associated lethal(2)03659 OS=Drosophila melanogaster OX=7227 GN=l(2)03659 PE=2 SV=4	INVnr_XP_001849399.1_multidrug_resistance_protein_2_[Culex_quinquefasciatus]
CPIJ004361	sin3b	72.696	-1.13888	0.22724	-5.0118	5.39e-07	5.11e-06		paired amphipathic helix Sin3a isoform X2	SIN3A_MOUSEPaired amphipathic helix Sin3a OS=Mus musculus OX=10090 GN=Sin3a PE=1 SV=3	INVnr_XP_001846120.1_sin3b_[Culex_quinquefasciatus]
CPIJ012986	epsin 4/enthoprotin	26.1131	-1.14025	0.329209	-3.46362	0.000532963	0.00237607		epsin 4 enthoprotin	TELO2_MOUSETelomere length regulation TEL2 homolog OS=Mus musculus OX=10090 GN=Telo2 PE=1 SV=2	INVnr_XP_001863514.1_epsin_4/enthoprotin_[Culex_quinquefasciatus]
CPIJ018355	smad, putative	9.01344	-1.14047	0.462281	-2.46705	0.0136231	0.0377995	cqu04068,cqu04144,cqu04350,cqu04933	smad	SMAD2_DANREMothers against decapentaplegic homolog 2 OS=Danio rerio OX=7955 GN=smad2 PE=2 SV=1	INVnr_XP_001868726.1_smad_[Culex_quinquefasciatus]
CPIJ012300	nonsense-mediated mrna decay protein 1	87.4623	-1.14057	0.205723	-5.54422	2.95e-08	3.68e-07	cqu03013,cqu03015	regulator of nonsense transcripts 1 homolog	RENT1_DROMERegulator of nonsense transcripts 1 homolog OS=Drosophila melanogaster OX=7227 GN=Upf1 PE=1 SV=2	INVnr_XP_001862543.1_nonsense-mediated_mRNA_decay_protein_1_[Culex_quinquefasciatus]
CPIJ016885	pre-mRNA-splicing factor prp1	25.7928	-1.14122	0.325086	-3.51053	0.000447206	0.00204819	cqu03040	pre-mRNA-splicing factor prp1	PRP6_HUMANPre-mRNA-processing factor 6 OS=Homo sapiens OX=9606 GN=PRPF6 PE=1 SV=1	INVnr_XP_001866982.1_pre-mRNA-splicing_factor_prp1_[Culex_quinquefasciatus]
CPIJ011378	cationic trypsin precursor	809.348	-1.14183	0.118816	-9.61005	7.25e-22	5.38e-20		cationic trypsin	CTR2_VESCRChymotrypsin-2 OS=Vespa crabro OX=7445 PE=1 SV=1	INVnr_XP_001861616.1_cationic_trypsin_[Culex_quinquefasciatus]
CPIJ011772	homeobox protein	10.6356	-1.14253	0.440526	-2.59355	0.00949906	0.0279966		pituitary homeobox homolog Ptx1	PITX_DROMEPituitary homeobox homolog Ptx1 OS=Drosophila melanogaster OX=7227 GN=Ptx1 PE=2 SV=2	INVnr_XP_001862650.1_homeobox_protein_[Culex_quinquefasciatus]
CPIJ000826	zinc finger protein nocA	54.12	-1.14253	0.261502	-4.36911	1.25e-05	8.78e-05		zinc finger nocA	NOC_DROMEZinc finger Noc OS=Drosophila melanogaster OX=7227 GN=noc PE=1 SV=1	INVnr_XP_001842449.1_zinc_finger_protein_nocA_[Culex_quinquefasciatus]
CPIJ011908	traf2 and nck interacting kinase, tnik	35.7622	-1.14409	0.288172	-3.97018	7.18e-05	0.000412967	cqu04013	traf2 and nck interacting tnik	MIG15_CAEELSerine threonine- kinase mig-15 OS=Caenorhabditis elegans OX=6239 GN=mig-15 PE=2 SV=3	INVnr_XP_001862121.1_traf2_and_nck_interacting_kinase,_tnik_[Culex_quinquefasciatus]
CPIJ011532	conserved hypothetical protein	73.3295	-1.14584	0.217292	-5.27326	1.34e-07	1.43e-06		conserved hypothetical protein	IWS1_RAT IWS1 homolog OS=Rattus norvegicus OX=10116 GN=Iws1 PE=1 SV=1	INVnr_XP_001861855.1_conserved_hypothetical_protein_[Culex_quinquefasciatus]
CPIJ006108	splicing factor	163.616	-1.14733	0.16937	-6.77409	1.25e-11	2.71e-10		splicing factor	HRP65_CHITEHrp65 OS=Chironomus tentans OX=7153 GN=HRP65 PE=1 SV=1	INVnr_XP_001847990.1_NONA_protein_[Culex_quinquefasciatus]
CPIJ004731	conserved hypothetical protein	15.6627	-1.14773	0.393644	-2.91565	0.00354944	0.0121253		conserved hypothetical protein	---NA---	INVnr_XP_001846755.1_conserved_hypothetical_protein_[Culex_quinquefasciatus]
CPIJ019900	inositol-1-monophosphatase	39.0137	-1.14831	0.286529	-4.00767	6.13e-05	0.000356984	cqu00562,cqu01100,cqu04070	inositol monophosphatase 2-like	SUHB_VIBCHInositol-1-monophosphatase OS=Vibrio cholerae serotype O1 (strain ATCC 39315 El Tor Inaba N16961) OX=243277 GN=VC_0745 PE=3 SV=2	INVnr_XP_001870231.1_inositol-1-monophosphatase_[Culex_quinquefasciatus]
CPIJ017444	mitochondrial GTPase 1	8.59788	-1.14967	0.473234	-2.42939	0.0151244	0.0415022		mitochondrial GTPase 1	MTG1_AEDAEMitochondrial GTPase 1 OS=Aedes aegypti OX=7159 GN=AAEL003813 PE=3 SV=1	INVnr_XP_001867602.1_mitochondrial_GTPase_1_[Culex_quinquefasciatus]
CPIJ014180	conserved hypothetical protein	10.2799	-1.14968	0.446681	-2.57382	0.0100583	0.0292892		conserved hypothetical protein	---NA---	INVnr_XP_001864209.1_conserved_hypothetical_protein_[Culex_quinquefasciatus]
CPIJ011583	hypothetical protein	15.3865	-1.15099	0.418284	-2.75169	0.00592877	0.0186772		---NA---	---NA---	NA
CPIJ002228	sentrin/sumo-specific protease senp7	10.7997	-1.15147	0.437716	-2.63064	0.00852238	0.0255088		sentrin sumo-specific protease senp7	---NA---	INVnr_XP_001843897.1_sentrin/sumo-specific_protease_senp7_[Culex_quinquefasciatus]
CPIJ013919	xanthine dehydrogenase/oxidase	529.505	-1.15167	0.179493	-6.41624	1.4e-10	2.56e-09	cqu00230,cqu00232,cqu00983,cqu01100,cqu04146	xanthine dehydrogenase oxidase	XDH_DROMEXanthine dehydrogenase OS=Drosophila melanogaster OX=7227 GN=ry PE=2 SV=2	INVnr_XP_001864333.1_xanthine_dehydrogenase/oxidase_[Culex_quinquefasciatus]
CPIJ001689	condensin	11.8261	-1.1522	0.425517	-2.70778	0.00677357	0.0210358		condensin complex subunit 1 isoform X2	CND1_MOUSECondensin complex subunit 1 OS=Mus musculus OX=10090 GN=Ncapd2 PE=1 SV=2	INVnr_XP_001843229.1_condensin_[Culex_quinquefasciatus]
CPIJ017077	conserved hypothetical protein	13.0218	-1.15232	0.419298	-2.74822	0.00599198	0.018851		split ends-like isoform X4	CECR2_MOUSECat eye syndrome critical region 2 homolog OS=Mus musculus OX=10090 GN=Cecr2 PE=1 SV=1	INVnr_XP_001867207.1_conserved_hypothetical_protein_[Culex_quinquefasciatus]
CPIJ013584	G patch domain containing 1	22.1778	-1.15241	0.346815	-3.32285	0.000891042	0.00371391		G patch domain containing 1	GPTC1_DROMEG patch domain-containing 1 homolog OS=Drosophila melanogaster OX=7227 GN=CG8833 PE=2 SV=1	INVnr_XP_001863956.1_G_patch_domain_containing_1_[Culex_quinquefasciatus]
CPIJ002867	AMP dependent coa ligase, putative	189.654	-1.15269	0.226053	-5.09922	3.41e-07	3.36e-06		4-coumarate-- ligase-like 7	4CL3_ORYSJProbable 4-coumarate-- ligase 3 OS=Oryza sativa japonica OX=39947 GN=4CL3 PE=2 SV=1	INVnr_XP_001844398.1_AMP_dependent_coa_ligase_[Culex_quinquefasciatus]
CPIJ010150	conserved hypothetical protein	47.3991	-1.15273	0.259023	-4.45033	8.57e-06	6.22e-05		conserved hypothetical protein	F16B1_XENLA FAM160B1 OS=Xenopus laevis OX=8355 GN=fam160b1 PE=2 SV=1	INVnr_XP_001854070.1_conserved_hypothetical_protein_[Culex_quinquefasciatus]
CPIJ011553	oligopeptidase A	266.264	-1.15387	0.152478	-7.56748	3.81e-14	1.2e-12		probable cytosolic oligopeptidase A	OOPDA_ARATHOrganellar oligopeptidase chloroplastic mitochondrial OS=Arabidopsis thaliana OX=3702 GN=OOP PE=1 SV=1	INVnr_XP_001861876.1_oligopeptidase_A_[Culex_quinquefasciatus]
CPIJ004261	conserved hypothetical protein	19.8669	-1.15501	0.359855	-3.20964	0.001329	0.0052622		conserved hypothetical protein	ICE2_DROMELittle elongation complex subunit 2 OS=Drosophila melanogaster OX=7227 GN=Ice2 PE=1 SV=1	INVnr_XP_001845841.1_conserved_hypothetical_protein_[Culex_quinquefasciatus]
CPIJ000374	elongation factor G 2, mitochondrial precursor	38.3757	-1.1555	0.295695	-3.90775	9.32e-05	0.000515888		elongation factor G mitochondrial	RRF2M_CULQURibosome-releasing factor mitochondrial OS=Culex quinquefasciatus OX=7176 GN=CPIJ000374 PE=3 SV=1	INVnr_XP_001842044.1_elongation_factor_G_2,_mitochondrial_[Culex_quinquefasciatus]
CPIJ003656	luciferin 4-monooxygenase	433.929	-1.15638	0.127953	-9.03756	1.6e-19	9.4e-18		luciferin 4-monooxygenase	LUCI_AQULALuciferin 4-monooxygenase OS=Aquatica lateralis OX=7052 PE=2 SV=1	INVnr_XP_001845435.1_luciferin_4-monooxygenase_[Culex_quinquefasciatus]
CPIJ012122	f-box and wd40 domain protein 7	8.86849	-1.15643	0.477941	-2.4196	0.0155376	0.0424872	cqu04120	f-box and wd40 domain 7	FBXW7_DROMEF-box WD repeat-containing 7 OS=Drosophila melanogaster OX=7227 GN=ago PE=1 SV=1	INVnr_XP_001862870.1_f-box_and_wd40_domain_protein_7_[Culex_quinquefasciatus]
CPIJ005086	glycogen synthase	114.735	-1.15652	0.212365	-5.44594	5.15e-08	6.01e-07	cqu00500,cqu01100	glycogen [starch] synthase	GYS_DROMEGlycogen	INVnr_XP_001846896.1_glycogen_synthase_[Culex_quinquefasciatus]
CPIJ015365	conserved hypothetical protein	8.6979	-1.15774	0.483916	-2.39245	0.0167365	0.0451347		conserved hypothetical protein	---NA---	INVnr_XP_001865839.1_conserved_hypothetical_protein_[Culex_quinquefasciatus]
CPIJ016436	zinc finger protein 277	39.4167	-1.15878	0.288357	-4.01855	5.86e-05	0.000343157		zinc finger 277	ZN277_HUMANZinc finger 277 OS=Homo sapiens OX=9606 GN=ZNF277 PE=1 SV=2	INVnr_XP_001866565.1_zinc_finger_protein_277_[Culex_quinquefasciatus]
CPIJ003688	calmodulin-binding transcription activator	69.427	-1.15923	0.233507	-4.96445	6.89e-07	6.37e-06		calmodulin-binding transcription activator	CMTA1_MOUSECalmodulin-binding transcription activator 1 OS=Mus musculus OX=10090 GN=Camta1 PE=2 SV=1	INVnr_XP_001845515.1_calmodulin-binding_transcription_activator_[Culex_quinquefasciatus]
CPIJ014149	splicing factor 3B subunit 4	11.4536	-1.16198	0.440223	-2.63953	0.00830222	0.0249279	cqu03040	splicing factor 3B subunit 4	SF3B4_HUMANSplicing factor 3B subunit 4 OS=Homo sapiens OX=9606 GN=SF3B4 PE=1 SV=1	INVnr_XP_019559272.1_PREDICTED:_splicing_factor_3B_subunit_4-like_[Aedes_albopictus]
CPIJ017999	malate dehydrogenase	27.0027	-1.16256	0.323423	-3.59454	0.000324971	0.00154564		malate dehydrogenase	MDHM_HUMANMalate mitochondrial OS=Homo sapiens OX=9606 GN=MDH2 PE=1 SV=3	INVnr_XP_001868238.1_malate_dehydrogenase_[Culex_quinquefasciatus]
CPIJ003819	rabenosyn-5	27.7116	-1.16444	0.319012	-3.65015	0.000262092	0.00128424	cqu04144	rabenosyn-5	RBNS5_MOUSERabenosyn-5 OS=Mus musculus OX=10090 GN=Rbsn PE=1 SV=1	INVnr_XP_001845392.1_rabenosyn-5_[Culex_quinquefasciatus]
CPIJ010067	ATP-binding cassette sub-family A member 3	1329.7	-1.16456	0.14162	-8.22318	1.98e-16	8.36e-15	cqu02010	ATP-binding cassette sub-family A member 3	ABCA3_HUMANATP-binding cassette sub-family A member 3 OS=Homo sapiens OX=9606 GN=ABCA3 PE=1 SV=2	INVnr_XP_001851801.1_ATP-binding_cassette_sub-family_A_member_3_[Culex_quinquefasciatus]
CPIJ011642	conserved hypothetical protein	21.4244	-1.16636	0.350089	-3.33161	0.000863466	0.00361609		conserved hypothetical protein	---NA---	INVnr_XP_001861832.1_conserved_hypothetical_protein_[Culex_quinquefasciatus]
CPIJ004237	conserved hypothetical protein	13.1839	-1.16714	0.412307	-2.83075	0.00464384	0.0152287	cqu03460	recQ-mediated genome instability 1-like	RMI1_XENLA -mediated genome instability 1 OS=Xenopus laevis OX=8355 GN=rmi1 PE=2 SV=1	INVnr_XP_001845817.1_conserved_hypothetical_protein_[Culex_quinquefasciatus]
CPIJ017078	conserved hypothetical protein	35.418	-1.16768	0.293637	-3.97663	6.99e-05	0.000402921		split ends isoform X4	CECR2_MOUSECat eye syndrome critical region 2 homolog OS=Mus musculus OX=10090 GN=Cecr2 PE=1 SV=1	INVnr_XP_001867208.1_conserved_hypothetical_protein_[Culex_quinquefasciatus]
CPIJ002300	hypothetical protein	8.0876	-1.17287	0.488602	-2.40047	0.0163741	0.0443613		hypothetical protein CpipJ_CPIJ002300	---NA---	INVnr_XP_001843969.1_hypothetical_protein_CpipJ_CPIJ002300_[Culex_quinquefasciatus]
CPIJ003766	conserved hypothetical protein	37.6272	-1.17466	0.290703	-4.04076	5.33e-05	0.000316164		forkhead box K1	FOXK2_XENLAForkhead box K2 OS=Xenopus laevis OX=8355 GN=foxk2 PE=2 SV=2	INVnr_XP_001845339.1_conserved_hypothetical_protein_[Culex_quinquefasciatus]
CPIJ013520	conserved hypothetical protein	15.7352	-1.17492	0.386819	-3.03739	0.00238635	0.00865129		rabankyrin-5-like isoform X1	ANFY1_MOUSERabankyrin-5 OS=Mus musculus OX=10090 GN=Ankfy1 PE=1 SV=2	INVnr_XP_001863606.1_conserved_hypothetical_protein_[Culex_quinquefasciatus]
CPIJ009034	conserved hypothetical protein	115.732	-1.1753	0.200075	-5.87428	4.25e-09	6.17e-08		conserved hypothetical protein	SECA_AMOA5 translocase subunit OS=Amoebophilus asiaticus (strain 5a2) OX=452471 GN=secA PE=3 SV=1	INVnr_XP_001850702.1_conserved_hypothetical_protein_[Culex_quinquefasciatus]
CPIJ007988	conserved hypothetical protein	122.379	-1.17601	0.200192	-5.87439	4.24e-09	6.17e-08		conserved hypothetical protein	RTC5_LACTCRestriction of telomere capping 5 OS=Lachancea thermotolerans (strain ATCC 56472 CBS 6340 NRRL Y-8284) OX=559295 GN=RTC5 PE=3 SV=1	INVnr_XP_001849942.1_conserved_hypothetical_protein_[Culex_quinquefasciatus]
CPIJ008558	conserved hypothetical protein	1526.14	-1.17725	0.341151	-3.45082	0.000558892	0.002476		conserved hypothetical protein	---NA---	INVnr_XP_001850297.1_conserved_hypothetical_protein_[Culex_quinquefasciatus]
CPIJ008300	zinc finger protein 501	13.2906	-1.17741	0.417759	-2.81839	0.00482646	0.0157396		zinc finger 501	ZSCA2_MOUSEZinc finger and SCAN domain-containing 2 OS=Mus musculus OX=10090 GN=Zscan2 PE=1 SV=1	INVnr_XP_001849416.1_zinc_finger_protein_501_[Culex_quinquefasciatus]
CPIJ012525	conserved hypothetical protein	8.56306	-1.17858	0.475654	-2.47782	0.0132189	0.0369061		nipped-B -like	NIPB_DROMENipped-B OS=Drosophila melanogaster OX=7227 GN=Nipped-B PE=1 SV=3	INVnr_XP_001863077.1_conserved_hypothetical_protein_[Culex_quinquefasciatus]
CPIJ001980	sodium/hydrogen exchanger 7, 9	70.1806	-1.18023	0.225583	-5.23193	1.68e-07	1.76e-06		sodium hydrogen exchanger 9	SL9A7_MOUSESodium hydrogen exchanger 7 OS=Mus musculus OX=10090 GN=Slc9a7 PE=1 SV=1	INVnr_XP_001843757.1_sodium/hydrogen_exchanger_7,_9_[Culex_quinquefasciatus]
CPIJ004732	conserved hypothetical protein	860.704	-1.18057	0.161216	-7.32292	2.43e-13	6.84e-12		conserved hypothetical protein	---NA---	INVnr_XP_001846756.1_conserved_hypothetical_protein_[Culex_quinquefasciatus]
CPIJ018155	luciferin 4-monooxygenase	77.5646	-1.18101	0.217099	-5.43996	5.33e-08	6.18e-07		probable 4-coumarate-- ligase 1	4CL3_DICDIProbable 4-coumarate-- ligase 3 OS=Dictyostelium discoideum OX=44689 GN=4cl3 PE=3 SV=2	INVnr_XP_001868564.1_luciferin_4-monooxygenase_[Culex_quinquefasciatus]
CPIJ012964	APG9: autophagy related gene	76.295	-1.18294	0.222766	-5.31023	1.09e-07	1.19e-06	cqu04136,cqu04137,cqu04140	autophagy 9	ATG9A_BOVINAutophagy-related 9A OS=Bos taurus OX=9913 GN=ATG9A PE=2 SV=1	INVnr_XP_001863826.1_autophagy_protein_9_[Culex_quinquefasciatus]
CPIJ011785	E3 ubiquitin-protein ligase nedd-4	116.162	-1.18386	0.193879	-6.10618	1.02e-09	1.67e-08		E3 ubiquitin- ligase nedd-4	NEDD4_DROMEE3 ubiquitin- ligase Nedd-4 OS=Drosophila melanogaster OX=7227 GN=Nedd4 PE=1 SV=2	INVnr_XP_001862528.1_E3_ubiquitin-protein_ligase_nedd-4_[Culex_quinquefasciatus]
CPIJ009488	conserved hypothetical protein	18.5092	-1.18584	0.373425	-3.17558	0.00149537	0.00579713		conserved hypothetical protein	---NA---	INVnr_XP_001851115.1_conserved_hypothetical_protein_[Culex_quinquefasciatus]
CPIJ015931	regulator of g protein signaling	114.745	-1.18637	0.197055	-6.02053	1.74e-09	2.74e-08		regulator of g signaling	RGS_DROMERegulator of G- signaling loco OS=Drosophila melanogaster OX=7227 GN=loco PE=1 SV=2	INVnr_XP_001866040.1_regulator_of_g_protein_signaling_[Culex_quinquefasciatus]
CPIJ005325	hypothetical protein	12.3018	-1.18665	0.421245	-2.81701	0.00484728	0.0157856		hypothetical protein CpipJ_CPIJ005325	---NA---	INVnr_XP_001846767.1_hypothetical_protein_CpipJ_CPIJ005325_[Culex_quinquefasciatus]
CPIJ000807	conserved hypothetical protein	39.4084	-1.18734	0.281495	-4.21799	2.46e-05	0.000159439		conserved hypothetical protein	---NA---	INVnr_XP_001842430.1_conserved_hypothetical_protein_[Culex_quinquefasciatus]
CPIJ014733	P53 induced protein	28.6305	-1.18744	0.314504	-3.77559	0.000159631	0.000823162		P53 induced	EI24_HUMANEtoposide-induced homolog OS=Homo sapiens OX=9606 GN=EI24 PE=1 SV=4	INVnr_XP_001865325.1_P53_induced_protein_[Culex_quinquefasciatus]
CPIJ016082	conserved hypothetical protein	7.32614	-1.18842	0.493925	-2.40608	0.0161249	0.0439056		transcription factor Ken 2	KEN1_CULQUTranscription factor Ken 1 OS=Culex quinquefasciatus OX=7176 GN=ken1 PE=3 SV=1	INVnr_XP_001866298.1_conserved_hypothetical_protein_[Culex_quinquefasciatus]
CPIJ009799	conserved hypothetical protein	98.7393	-1.19067	0.209193	-5.69173	1.26e-08	1.69e-07		glucose-induced degradation 4 homolog	GID4_MOUSEGlucose-induced degradation 4 homolog OS=Mus musculus OX=10090 GN=Gid4 PE=1 SV=1	INVnr_XP_001870747.1_conserved_hypothetical_protein_[Culex_quinquefasciatus]
CPIJ018864	adenomatous polyposis coli	28.3312	-1.19105	0.314943	-3.7818	0.0001557	0.000808229		adenomatous polyposis	---NA---	INVnr_XP_001869283.1_adenomatous_polyposis_coli,_partial_[Culex_quinquefasciatus]
CPIJ010979	phosphatidylcholine-sterol acyltransferase precursor	49.0731	-1.19128	0.268743	-4.43278	9.3e-06	6.7e-05	cqu00564,cqu04142	phosphatidylcholine-sterol acyltransferase	PAG15_HUMANGroup XV phospholipase A2 OS=Homo sapiens OX=9606 GN=PLA2G15 PE=1 SV=2	INVnr_XP_001861793.1_phosphatidylcholine-sterol_acyltransferase_[Culex_quinquefasciatus]
CPIJ005728	conserved hypothetical protein	248.265	-1.19189	0.167964	-7.09611	1.28e-12	3.3e-11		conserved hypothetical protein	---NA---	INVnr_XP_001847151.1_conserved_hypothetical_protein_[Culex_quinquefasciatus]
CPIJ006917	NFkappaB essential modulator, putative	76.0717	-1.19453	0.221788	-5.38592	7.21e-08	8.19e-07	cqu04624	N essential modulator	NEMO_DROMENF-kappa-B essential modulator OS=Drosophila melanogaster OX=7227 GN=key PE=1 SV=1	INVnr_XP_001848522.1_NFkappaB_essential_modulator_[Culex_quinquefasciatus]
CPIJ004645	conserved hypothetical protein	32.2109	-1.19512	0.30713	-3.89127	9.97e-05	0.000550501		major facilitator superfamily domain-containing 12-like	MFS12_MOUSEMajor facilitator superfamily domain-containing 12 OS=Mus musculus OX=10090 GN=Mfsd12 PE=1 SV=1	INVnr_XP_001846180.1_conserved_hypothetical_protein_[Culex_quinquefasciatus]
CPIJ005256	TFIIH basal transcription factor complex p52 subunit	32.2069	-1.19534	0.296666	-4.02923	5.6e-05	0.000330138	cqu03022,cqu03420	TFIIH basal transcription factor complex p52 subunit	TF2H4_MOUSEGeneral transcription factor IIH subunit 4 OS=Mus musculus OX=10090 GN=Gtf2h4 PE=1 SV=1	INVnr_XP_001847575.1_TFIIH_basal_transcription_factor_complex_p52_subunit_[Culex_quinquefasciatus]
CPIJ007912	tuberous sclerosis complex 2	97.7221	-1.19687	0.208372	-5.74392	9.25e-09	1.27e-07	cqu04140,cqu04150	tuberous sclerosis complex 2	TSC2_RATTuberin OS=Rattus norvegicus OX=10116 GN=Tsc2 PE=1 SV=1	INVnr_XP_001849546.1_tuberous_sclerosis_complex_2_[Culex_quinquefasciatus]
CPIJ015681	CYP4H37: cytochrome P450 4H37	533.382	-1.19694	0.138819	-8.62228	6.56e-18	3.3e-16		cytochrome P450 4d1	CP4D1_DROMECytochrome P450 4d1 OS=Drosophila melanogaster OX=7227 GN=Cyp4d1 PE=2 SV=2	INVnr_XP_001866325.1_cytochrome_P450_4d1_[Culex_quinquefasciatus]
CPIJ003818	conserved hypothetical protein	175.228	-1.19721	0.169609	-7.05862	1.68e-12	4.22e-11		von Willebrand factor A domain-containing 8-like	VWA8_DANREvon Willebrand factor A domain-containing 8 OS=Danio rerio OX=7955 GN=si:dkey- PE=3 SV=1	INVnr_XP_001845391.1_conserved_hypothetical_protein_[Culex_quinquefasciatus]
CPIJ014760	tubulin-specific chaperone D	15.346	-1.19731	0.389397	-3.07479	0.00210653	0.00779737		tubulin-specific chaperone D	TBCD_MOUSETubulin-specific chaperone D OS=Mus musculus OX=10090 GN=Tbcd PE=1 SV=1	INVnr_XP_001865160.1_tubulin-specific_chaperone_D_[Culex_quinquefasciatus]
CPIJ016827	26S proteasome regulatory subunit S3	14.225	-1.19764	0.414162	-2.89172	0.00383134	0.0129625		26S proteasome regulatory subunit S3	CSN3_DROMECOP9 signalosome complex subunit 3 OS=Drosophila melanogaster OX=7227 GN=CSN3 PE=2 SV=2	INVnr_XP_001867287.1_26S_proteasome_regulatory_subunit_S3_[Culex_quinquefasciatus]
CPIJ009945	conserved hypothetical protein	72.0147	-1.19767	0.235975	-5.07541	3.87e-07	3.76e-06		conserved hypothetical protein	---NA---	INVnr_XP_001870742.1_conserved_hypothetical_protein_[Culex_quinquefasciatus]
CPIJ014232	conserved hypothetical protein	82.093	-1.19951	0.216212	-5.54785	2.89e-08	3.61e-07		conserved hypothetical protein	CCCP_DROMECircadian clock-controlled OS=Drosophila melanogaster OX=7227 GN=anon- PE=2 SV=2	INVnr_XP_001864311.1_conserved_hypothetical_protein_[Culex_quinquefasciatus]
CPIJ006203	conserved hypothetical protein	11.7745	-1.20008	0.429252	-2.79576	0.00517785	0.016723		conserved hypothetical protein	NPA1P_HUMANNucleolar pre-ribosomal-associated 1 OS=Homo sapiens OX=9606 GN=URB1 PE=1 SV=4	INVnr_XP_001847938.1_conserved_hypothetical_protein_[Culex_quinquefasciatus]
CPIJ008349	GATA transcription factor GATAc	129.583	-1.20273	0.206011	-5.83818	5.28e-09	7.6e-08		erythroid transcription factor isoform X3	GAT6A_XENLAGATA-binding factor 6-A OS=Xenopus laevis OX=8355 GN=gata6-a PE=2 SV=1	INVnr_XP_001849613.1_GATA_transcription_factor_GATAc_[Culex_quinquefasciatus]
CPIJ002609	protein serine/threonine kinase, putative	69.5356	-1.20361	0.284006	-4.23796	2.26e-05	0.000147659		serine threonine kinase	PEB3_DROMEEjaculatory bulb-specific 3 OS=Drosophila melanogaster OX=7227 GN= PE=2 SV=2	INVnr_XP_001844678.1_serine/threonine_kinase_[Culex_quinquefasciatus]
CPIJ010510	WD repeat protein 59	58.787	-1.20455	0.248712	-4.84315	1.28e-06	1.11e-05	cqu04150	WD repeat 59	WDR59_DROMEGATOR complex WDR59 OS=Drosophila melanogaster OX=7227 GN=CG4705 PE=1 SV=3	INVnr_XP_001870851.1_WD_repeat_protein_59_[Culex_quinquefasciatus]
CPIJ007830	conserved hypothetical protein	94.5662	-1.205	0.201629	-5.97634	2.28e-09	3.49e-08		ester hydrolase C11orf54 homolog isoform X1	CK054_RATEster hydrolase C11orf54 homolog OS=Rattus norvegicus OX=10116 PE=1 SV=1	INVnr_XP_001849494.1_conserved_hypothetical_protein_[Culex_quinquefasciatus]
CPIJ002857	rab-protein	13.4285	-1.20598	0.410165	-2.94023	0.00327966	0.0113635		prenyltransferase alpha subunit repeat-containing 1-B-like isoform X1	PTR1B_XENLA prenyltransferase alpha subunit repeat-containing 1-B (Fragment) OS=Xenopus laevis OX=8355 GN=ptar1-b PE=2 SV=1	INVnr_XP_001844388.1_rab-protein_[Culex_quinquefasciatus]
CPIJ020229	CYP4D42: cytochrome P450 4D42	42.3713	-1.20644	0.271859	-4.43774	9.09e-06	6.55e-05		cytochrome P450 4d8	CP4D2_DROMECytochrome P450 4d2 OS=Drosophila melanogaster OX=7227 GN=Cyp4d2 PE=2 SV=2	INVnr_XP_001870443.1_cytochrome_P450_4d8_[Culex_quinquefasciatus]
CPIJ016899	ns1 binding protein	31.4976	-1.20716	0.314232	-3.84161	0.000122228	0.000658238		ns1 binding	---NA---	INVnr_XP_001867025.1_ns1_binding_protein_[Culex_quinquefasciatus]
CPIJ012271	WD and tetratricopeptide repeats protein 1	76.1397	-1.20735	0.225854	-5.34572	9.01e-08	9.94e-07		WD and tetratricopeptide repeats 1	DCAF6_HUMANDDB1- and CUL4-associated factor 6 OS=Homo sapiens OX=9606 GN=DCAF6 PE=1 SV=1	INVnr_XP_001862619.1_WD_and_tetratricopeptide_repeats_protein_1_[Culex_quinquefasciatus]
CPIJ006954	peptidyl-prolyl cis-trans isomerase	11.2232	-1.20745	0.438385	-2.75431	0.00588163	0.0185484		peptidyl-prolyl cis-trans isomerase	PPIA1_RHIO9Peptidyl-prolyl cis-trans isomerase A1 OS=Rhizopus delemar (strain RA 99-880 ATCC MYA-4621 FGSC 9543 NRRL 43880) OX=246409 GN=cyp2 PE=3 SV=1	INVnr_XP_001849001.1_peptidyl-prolyl_cis-trans_isomerase_[Culex_quinquefasciatus]
CPIJ011452	ku P80 DNA helicase	34.1702	-1.20937	0.304363	-3.97345	7.08e-05	0.00040801	cqu03450	ku P80 DNA helicase	XRCC5_HUMANX-ray repair cross-complementing 5 OS=Homo sapiens OX=9606 GN=XRCC5 PE=1 SV=3	INVnr_XP_001861497.1_ku_P80_DNA_helicase_[Culex_quinquefasciatus]
CPIJ009106	angiotensin-converting enzyme precursor	392.795	-1.2097	0.147462	-8.20344	2.34e-16	9.74e-15		angiotensin-converting enzyme	ACE_DROMEAngiotensin-converting enzyme OS=Drosophila melanogaster OX=7227 GN=Ance PE=1 SV=3	INVnr_XP_001851223.1_angiotensin-converting_enzyme_[Culex_quinquefasciatus]
CPIJ014907	xaa-pro dipeptidase	109.539	-1.21195	0.209595	-5.78236	7.37e-09	1.04e-07		xaa-pro dipeptidase	PEPD_HUMANXaa-Pro dipeptidase OS=Homo sapiens OX=9606 GN=PEPD PE=1 SV=3	INVnr_XP_001865452.1_xaa-pro_dipeptidase_[Culex_quinquefasciatus]
CPIJ001354	exocyst complex component 4	96.7957	-1.21658	0.205	-5.93453	2.95e-09	4.43e-08		exocyst complex component 4	EXOC4_DROMEExocyst complex component 4 OS=Drosophila melanogaster OX=7227 GN=Sec8 PE=1 SV=3	INVnr_XP_001843132.1_exocyst_complex_component_4_[Culex_quinquefasciatus]
CPIJ001757	CYP4H39: cytochrome P450 4H39	133.404	-1.21674	0.208371	-5.83929	5.24e-09	7.57e-08		cytochrome P450 4d1	CP4D1_DROMECytochrome P450 4d1 OS=Drosophila melanogaster OX=7227 GN=Cyp4d1 PE=2 SV=2	INVnr_XP_001843622.1_cytochrome_P450_4d1_[Culex_quinquefasciatus]
CPIJ012123	predicted protein	8.8586	-1.22015	0.473413	-2.57735	0.00995605	0.0290756		ankyrin 2,3	MTPN_XENTRMyotrophin OS=Xenopus tropicalis OX=8364 GN=mtpn PE=3 SV=1	INVnr_XP_001862871.1_predicted_protein_[Culex_quinquefasciatus]
CPIJ015786	programmed cell death	221.942	-1.2202	0.172693	-7.06575	1.6e-12	4.03e-11		programmed cell death 4	PDCD4_CHICKProgrammed cell death 4 OS=Gallus gallus OX=9031 GN=PDCD4 PE=2 SV=1	INVnr_XP_001865859.1_programmed_cell_death_[Culex_quinquefasciatus]
CPIJ007050	N(2),N(2)-dimethylguanosine tRNA methyltransferase	77.4641	-1.22092	0.251267	-4.85906	1.18e-06	1.03e-05		probable tRNA (guanine(26)-N(2))-dimethyltransferase	TRM1_DROMEProbable tRNA (guanine(26)-N(2))-dimethyltransferase OS=Drosophila melanogaster OX=7227 GN=CG6388 PE=2 SV=1	INVnr_XP_001848579.1_N(2),N(2)-dimethylguanosine_tRNA_methyltransferase_[Culex_quinquefasciatus]
CPIJ015817	conserved hypothetical protein	9.10185	-1.22173	0.477162	-2.56041	0.0104547	0.0302279		fatty acyl- reductase CG8306	---NA---	INVnr_XP_001865904.1_conserved_hypothetical_protein_[Culex_quinquefasciatus]
CPIJ011039	amino acid transporter	22.2876	-1.22205	0.359245	-3.40171	0.000669653	0.00290802		proton-coupled amino acid transporter CG1139	PATH_DROMEProton-coupled amino acid transporter pathetic OS=Drosophila melanogaster OX=7227 GN=path PE=1 SV=1	INVnr_XP_001861305.1_amino_acid_transporter_[Culex_quinquefasciatus]
CPIJ003276	deoxynucleoside kinase	25.8235	-1.22344	0.331072	-3.69538	0.000219555	0.00109219		deoxynucleoside kinase	DNK_DROMEDeoxynucleoside kinase OS=Drosophila melanogaster OX=7227 GN=dnk PE=1 SV=1	INVnr_XP_001845002.1_deoxynucleoside_kinase_[Culex_quinquefasciatus]
CPIJ019630	conserved hypothetical protein	53.7534	-1.22368	0.248491	-4.92445	8.46e-07	7.68e-06		testis-expressed sequence 10 homolog	TEX10_DANRETestis-expressed protein 10 homolog OS=Danio rerio OX=7955 GN=tex10 PE=2 SV=2	INVnr_XP_001869841.1_conserved_hypothetical_protein_[Culex_quinquefasciatus]
CPIJ007046	ribonuclease Z, mitochondrial precursor	36.8438	-1.2249	0.308552	-3.96983	7.19e-05	0.000413238	cqu03013	ribonuclease mitochondrial	RNZ_DROMERibonuclease mitochondrial OS=Drosophila melanogaster OX=7227 GN=R PE=2 SV=2	INVnr_XP_001848575.1_ribonuclease_Z,_mitochondrial_[Culex_quinquefasciatus]
CPIJ012084	conserved hypothetical protein	27.7548	-1.22538	0.314214	-3.89982	9.63e-05	0.00053226	cqu00230,cqu00240,cqu01100,cqu03030,cqu03410,cqu03420,cqu03430,cqu03440	neurofilament heavy polypeptide	---NA---	INVnr_XP_001862038.1_conserved_hypothetical_protein_[Culex_quinquefasciatus]
CPIJ015919	conserved hypothetical protein	27.9788	-1.22843	0.322417	-3.81006	0.000138934	0.00073264		conserved hypothetical protein	---NA---	INVnr_XP_001866186.1_conserved_hypothetical_protein_[Culex_quinquefasciatus]
CPIJ015901	conserved hypothetical protein	27.1096	-1.22975	0.322127	-3.81759	0.000134764	0.000715356		ankyrin repeat domain-containing 11	ANR11_HUMANAnkyrin repeat domain-containing 11 OS=Homo sapiens OX=9606 GN=ANKRD11 PE=1 SV=3	INVnr_XP_001866134.1_conserved_hypothetical_protein_[Culex_quinquefasciatus]
CPIJ006542	chymotrypsin-2	252.868	-1.23062	0.366297	-3.35962	0.000780495	0.0033401		urokinase-type plasminogen activator	CTR2_VESCRChymotrypsin-2 OS=Vespa crabro OX=7445 PE=1 SV=1	INVnr_XP_001848039.1_chymotrypsin-2_[Culex_quinquefasciatus]
CPIJ017122	conserved hypothetical protein	8.9701	-1.23131	0.470154	-2.61895	0.00882011	0.0262813		conserved hypothetical protein	SOD1A_XENLASuperoxide dismutase	INVnr_XP_001867789.1_conserved_hypothetical_protein_[Culex_quinquefasciatus]
CPIJ015838	conserved hypothetical protein	6.87966	-1.23148	0.505216	-2.43753	0.0147882	0.0406734		desumoylating isopeptidase 2 isoform X1	DESI2_XENLADeubiquitinase DESI2 OS=Xenopus laevis OX=8355 GN=desi2 PE=2 SV=1	INVnr_XP_001847928.1_conserved_hypothetical_protein_[Culex_quinquefasciatus]
CPIJ004193	conserved hypothetical protein	7.43568	-1.23267	0.498065	-2.47492	0.0133265	0.0371328		furry-like isoform X3	FRY_DROME furry OS=Drosophila melanogaster OX=7227 GN=fry PE=1 SV=2	INVnr_XP_001846206.1_conserved_hypothetical_protein_[Culex_quinquefasciatus]
CPIJ001407	tetratricopeptide repeat protein 37	16.6969	-1.23305	0.389629	-3.16467	0.0015526	0.00598605	cqu03018	tetratricopeptide repeat 37	TTC37_XENLATetratricopeptide repeat 37 OS=Xenopus laevis OX=8355 GN=ttc37 PE=2 SV=1	INVnr_XP_001843305.1_tetratricopeptide_repeat_protein_37_[Culex_quinquefasciatus]
CPIJ000766	conserved hypothetical protein	35.0335	-1.238	0.299698	-4.13083	3.61e-05	0.000224917		conserved hypothetical protein	---NA---	INVnr_XP_001842572.1_conserved_hypothetical_protein_[Culex_quinquefasciatus]
CPIJ005821	multi-sex-combs	14.6185	-1.24153	0.39946	-3.10802	0.00188345	0.00707573		la-related 7-like	LARP7_DANRELa-related 7 OS=Danio rerio OX=7955 GN=larp7 PE=2 SV=1	INVnr_XP_001847842.1_multi-sex-combs_[Culex_quinquefasciatus]
CPIJ008235	conserved hypothetical protein	23.8164	-1.24195	0.345402	-3.59566	0.000323573	0.00154003		conserved hypothetical protein	---NA---	INVnr_XP_001849963.1_conserved_hypothetical_protein_[Culex_quinquefasciatus]
CPIJ000640	Tsc1	174.606	-1.2429	0.177503	-7.00213	2.52e-12	6.17e-11	cqu04140,cqu04150	Tsc1	TSC1_RATHamartin OS=Rattus norvegicus OX=10116 GN=Tsc1 PE=1 SV=1	INVnr_XP_001842403.1_Tsc1_[Culex_quinquefasciatus]
CPIJ015837	conserved hypothetical protein	41.3749	-1.24315	0.274735	-4.52491	6.04e-06	4.55e-05		RNA polymerase-associated Rtf1	RTF1_DROMERNA polymerase-associated Rtf1 OS=Drosophila melanogaster OX=7227 GN=Rtf1 PE=1 SV=1	INVnr_XP_001866828.1_conserved_hypothetical_protein_[Culex_quinquefasciatus]
CPIJ010474	sin3a-associated protein sap130	11.2756	-1.24328	0.436946	-2.84539	0.00443577	0.0146076		sin3a-associated sap130	SP13B_XENLAHistone deacetylase complex subunit SAP130-B OS=Xenopus laevis OX=8355 GN=sap130-b PE=2 SV=1	INVnr_XP_001854878.1_sin3a-associated_protein_sap130_[Culex_quinquefasciatus]
CPIJ005187	phenoloxidase subunit 1	8.93941	-1.24439	0.482881	-2.577	0.00996613	0.029093		phenoloxidase subunit 1	PPO1_HOLDIPhenoloxidase 1 OS=Holotrichia diomphalia OX=33394 GN=PPO1 PE=1 SV=1	INVnr_XP_001847080.1_phenoloxidase_subunit_1_[Culex_quinquefasciatus]
CPIJ012727	conserved hypothetical protein	23.0767	-1.2451	0.344392	-3.61537	0.000299919	0.0014401		split ends-like	ARI5B_MOUSEAT-rich interactive domain-containing 5B OS=Mus musculus OX=10090 GN=Arid5b PE=1 SV=3	INVnr_XP_001863144.1_conserved_hypothetical_protein_[Culex_quinquefasciatus]
CPIJ000280	conserved hypothetical protein	6.38645	-1.24629	0.518515	-2.40358	0.0162354	0.0441211		serine arginine repetitive matrix 2 isoform X3	SRRM2_HUMANSerine arginine repetitive matrix 2 OS=Homo sapiens OX=9606 GN=SRRM2 PE=1 SV=2	INVnr_XP_001841853.1_conserved_hypothetical_protein_[Culex_quinquefasciatus]
CPIJ006676	conserved hypothetical protein	154.606	-1.24822	0.183873	-6.78848	1.13e-11	2.47e-10		nose resistant to fluoxetine 6-like	NRF6_CAEELNose resistant to fluoxetine 6 OS=Caenorhabditis elegans OX=6239 GN=nrf-6 PE=1 SV=3	INVnr_XP_001848234.1_conserved_hypothetical_protein_[Culex_quinquefasciatus]
CPIJ004851	conserved hypothetical protein	26.093	-1.25167	0.333854	-3.74915	0.000177436	0.000905041	cqu04013,cqu04624	cyclic AMP-dependent transcription factor ATF-7-like	ATF2_RATCyclic AMP-dependent transcription factor ATF-2 OS=Rattus norvegicus OX=10116 GN=Atf2 PE=1 SV=2	INVnr_XP_001846500.1_conserved_hypothetical_protein_[Culex_quinquefasciatus]
CPIJ006282	serine/threonine protein kinase, putative	52.7189	-1.25169	0.279293	-4.48164	7.41e-06	5.44e-05		serine threonine kinase	TRIB2_HUMANTribbles homolog 2 OS=Homo sapiens OX=9606 GN=TRIB2 PE=1 SV=1	INVnr_XP_001847748.1_serine/threonine_protein_kinase_[Culex_quinquefasciatus]
CPIJ000180	conserved hypothetical protein	11.6885	-1.25195	0.444693	-2.81531	0.00487298	0.0158619		conserved hypothetical protein	ZEP3_MOUSETranscription factor HIVEP3 OS=Mus musculus OX=10090 GN=Hivep3 PE=1 SV=1	INVnr_XP_001841945.1_conserved_hypothetical_protein_[Culex_quinquefasciatus]
CPIJ004458	ATP-dependent RNA helicase DHX8	5.98553	-1.25212	0.528386	-2.3697	0.0178024	0.047554		ATP-dependent RNA helicase DHX33	DHX33_MOUSEATP-dependent RNA helicase DHX33 OS=Mus musculus OX=10090 GN=Dhx33 PE=1 SV=1	INVnr_XP_001846044.1_ATP-dependent_RNA_helicase_DHX8_[Culex_quinquefasciatus]
CPIJ001498	sprinter	6.35255	-1.25537	0.523853	-2.39642	0.016556	0.0446994		sprinter	WLS_DROVI wntless OS=Drosophila virilis OX=7244 GN=wls PE=3 SV=1	INVnr_XP_001843799.1_sprinter_[Culex_quinquefasciatus]
CPIJ012330	oocyte zinc finger protein XLCOF10	15.4147	-1.2568	0.395204	-3.18014	0.00147203	0.00571924		oocyte zinc finger XLCOF10	GRAU_DROMETranscription factor grauzone OS=Drosophila melanogaster OX=7227 GN=grau PE=1 SV=1	INVnr_XP_001862414.1_oocyte_zinc_finger_protein_XLCOF10_[Culex_quinquefasciatus]
CPIJ013879	DNA polymerase theta, putative	16.1295	-1.25778	0.392625	-3.20351	0.00135765	0.0053426		DNA polymerase theta	DPOLQ_DROMEDNA polymerase theta OS=Drosophila melanogaster OX=7227 GN=mus308 PE=1 SV=1	INVnr_XP_001864122.1_DNA_polymerase_theta_[Culex_quinquefasciatus]
CPIJ010173	testis-specific protein pbs13	65.1378	-1.2594	0.242194	-5.19997	1.99e-07	2.05e-06		T-complex 11 1 isoform X1	T11L1_HUMANT-complex 11 1 OS=Homo sapiens OX=9606 GN=TCP11L1 PE=1 SV=1	INVnr_XP_001853447.1_testis-specific_protein_pbs13_[Culex_quinquefasciatus]
CPIJ002156	chymotrypsin BI precursor	118.156	-1.26016	0.473798	-2.6597	0.00782098	0.0237666		chymotrypsin BI	CTR_PHACEChymotrypsin OS=Phaedon cochleariae OX=80249 PE=2 SV=1	INVnr_XP_001843424.1_chymotrypsin_BI_[Culex_quinquefasciatus]
CPIJ006276	F-box/WD repeat protein 5	91.6588	-1.26061	0.215334	-5.85423	4.79e-09	6.95e-08		F-box WD repeat 5	FBXW5_RATF-box WD repeat-containing 5 OS=Rattus norvegicus OX=10116 GN=Fbxw5 PE=2 SV=1	INVnr_XP_001847742.1_F-box/WD_repeat_protein_5_[Culex_quinquefasciatus]
CPIJ002138	chymotrypsinogen, putative	35.6903	-1.26157	0.292516	-4.31282	1.61e-05	0.000109921		4 chymotrypsinogen	CTRC_HUMANChymotrypsin-C OS=Homo sapiens OX=9606 GN=CTRC PE=1 SV=2	INVnr_XP_001843406.1_chymotrypsinogen_[Culex_quinquefasciatus]
CPIJ006330	conserved hypothetical protein	95.9264	-1.26257	0.202826	-6.2249	4.82e-10	8.24e-09		serine threonine- phosphatase 4 regulatory subunit 3 isoform X1	PP4R3_DROMESerine threonine- phosphatase 4 regulatory subunit 3 OS=Drosophila melanogaster OX=7227 GN=flfl PE=1 SV=4	INVnr_XP_001847867.1_conserved_hypothetical_protein_[Culex_quinquefasciatus]
CPIJ019028	ran	32.8001	-1.26327	0.318812	-3.96241	7.42e-05	0.000423531	cqu03008,cqu03013	GTP-binding nuclear Ran	RAN_DROMEGTP-binding nuclear Ran OS=Drosophila melanogaster OX=7227 GN=Ran PE=1 SV=1	INVnr_XP_001869597.1_ran_[Culex_quinquefasciatus]
CPIJ000299	CYP6AH3: cytochrome P450	399.186	-1.26341	0.146687	-8.61298	7.12e-18	3.56e-16		probable cytochrome P450 308a1	CP308_DROMEProbable cytochrome P450 308a1 OS=Drosophila melanogaster OX=7227 GN=Cyp308a1 PE=2 SV=2	INVnr_XP_001841872.1_cytochrome_P450_6B6_[Culex_quinquefasciatus]
CPIJ008851	maltose phosphorylase	3148.34	-1.26412	0.150093	-8.42223	3.69e-17	1.71e-15		maltose phosphorylase	PGGHG_DICDI -glucosylgalactosylhydroxylysine glucosidase OS=Dictyostelium discoideum OX=44689 GN=pgghg PE=3 SV=2	INVnr_XP_001850769.1_maltose_phosphorylase_[Culex_quinquefasciatus]
CPIJ003062	cornetto	26.7076	-1.26455	0.341765	-3.70006	0.000215548	0.0010753		cornetto	---NA---	INVnr_XP_001844448.1_cornetto_[Culex_quinquefasciatus]
CPIJ015854	hypothetical protein	15.291	-1.26581	0.39471	-3.20694	0.00134155	0.00529997		hypothetical protein CpipJ_CPIJ015854	---NA---	INVnr_XP_001865955.1_hypothetical_protein_CpipJ_CPIJ015854_[Culex_quinquefasciatus]
CPIJ005947	conserved hypothetical protein	5.86324	-1.26613	0.534401	-2.36926	0.0178238	0.0475753		bromodomain-containing 3	PHRF1_MOUSEPHD and RING finger domain-containing 1 OS=Mus musculus OX=10090 GN=Phrf1 PE=1 SV=2	INVnr_XP_001847395.1_conserved_hypothetical_protein_[Culex_quinquefasciatus]
CPIJ002338	conserved hypothetical protein	125.268	-1.26988	0.196717	-6.45536	1.08e-10	2.03e-09		conserved hypothetical protein	GILT1_DROMEGILT 1 OS=Drosophila melanogaster OX=7227 GN=GILT1 PE=2 SV=1	INVnr_XP_001844007.1_conserved_hypothetical_protein_[Culex_quinquefasciatus]
CPIJ005745	c3f	69.9819	-1.27062	0.223883	-5.67539	1.38e-08	1.84e-07	cqu00564	lysophospholipid acyltransferase 5-like	MBOA5_DROMELysophospholipid acyltransferase 5 OS=Drosophila melanogaster OX=7227 GN=nes PE=1 SV=1	INVnr_XP_001847168.1_c3f_[Culex_quinquefasciatus]
CPIJ017203	conserved hypothetical protein	11.4781	-1.27077	0.442838	-2.8696	0.00410997	0.0137468	cqu03460	conserved hypothetical protein	FANCM_MOUSEFanconi anemia group M homolog OS=Mus musculus OX=10090 GN=Fancm PE=1 SV=3	INVnr_XP_001867348.1_conserved_hypothetical_protein_[Culex_quinquefasciatus]
CPIJ016736	cysteine-rich venom protein, putative	312.427	-1.2725	0.174216	-7.30412	2.79e-13	7.77e-12		cysteine-rich venom	VPI2_SCOJEVenom peptide -2 OS=Scorpiops jendeki OX=587368 PE=2 SV=1	INVnr_XP_001866936.1_cysteine-rich_venom_protein_[Culex_quinquefasciatus]
CPIJ012306	zinc finger imprinted 3	12.8749	-1.27263	0.419589	-3.03305	0.00242094	0.00875866		zinc finger imprinted 3	ZFP26_MOUSEZinc finger 26 OS=Mus musculus OX=10090 GN=Zfp26 PE=2 SV=2	INVnr_XP_001862549.1_zinc_finger_imprinted_3_[Culex_quinquefasciatus]
CPIJ006699	wiskott-aldrich syndrome protein	54.5046	-1.27379	0.260269	-4.89413	9.87e-07	8.79e-06	cqu04144	neural Wiskott-Aldrich syndrome	WASL_MOUSENeural Wiskott-Aldrich syndrome OS=Mus musculus OX=10090 GN=Wasl PE=1 SV=1	INVnr_XP_001848257.1_wiskott-aldrich_syndrome_protein_[Culex_quinquefasciatus]
CPIJ013380	sorbitol dehydrogenase	2319.13	-1.27542	0.104988	-12.1482	5.86e-34	1.01e-31	cqu00040,cqu00051,cqu01100	sorbitol dehydrogenase	DHSO_BOVINSorbitol dehydrogenase OS=Bos taurus OX=9913 GN=SORD PE=2 SV=3	INVnr_XP_001863562.1_sorbitol_dehydrogenase_[Culex_quinquefasciatus]
CPIJ008857	conserved hypothetical protein	5.95187	-1.27681	0.532206	-2.39908	0.0164362	0.044444		conserved hypothetical protein	LCP_STRK3Rubber oxygenase OS=Streptomyces (strain K30) OX=256642 GN=lcp PE=1 SV=2	INVnr_XP_001850775.1_conserved_hypothetical_protein_[Culex_quinquefasciatus]
CPIJ002234	conserved hypothetical protein	6.61141	-1.27729	0.513159	-2.48907	0.0128079	0.0359009	cqu04150	folliculin-interacting 2	FNIP2_HUMANFolliculin-interacting 2 OS=Homo sapiens OX=9606 GN=FNIP2 PE=1 SV=2	INVnr_XP_001843903.1_conserved_hypothetical_protein_[Culex_quinquefasciatus]
CPIJ009467	conserved hypothetical protein	82.3886	-1.27872	0.21382	-5.98035	2.23e-09	3.41e-08		WW domain-containing tag-325-like isoform X2	TG325_CAEELWW domain-containing tag-325 OS=Caenorhabditis elegans OX=6239 GN=tag-325 PE=4 SV=1	INVnr_XP_001851415.1_conserved_hypothetical_protein_[Culex_quinquefasciatus]
CPIJ013982	conserved hypothetical protein	61.0162	-1.28441	0.240137	-5.34864	8.86e-08	9.8e-07	cqu03013	mediator of RNA polymerase II transcription subunit 13-like	PAIP1_MOUSEPolyadenylate-binding -interacting 1 OS=Mus musculus OX=10090 GN=Paip1 PE=1 SV=1	INVnr_XP_001863912.1_conserved_hypothetical_protein_[Culex_quinquefasciatus]
CPIJ008487	mitogen activated protein kinase kinase kinase 5, mapkkk5, mekk5	34.1942	-1.28579	0.316232	-4.06599	4.78e-05	0.000288205	cqu04013,cqu04141,cqu04214	mitogen-activated kinase kinase kinase 15-like isoform X2	M3K15_HUMANMitogen-activated kinase kinase kinase 15 OS=Homo sapiens OX=9606 GN=MAP3K15 PE=1 SV=2	INVnr_XP_001850086.1_mitogen_activated_protein_kinase_kinase_kinase_5,_mapkkk5,_mekk5_[Culex_quinquefasciatus]
CPIJ000602	sulfate transporter, putative	13.6616	-1.28837	0.417421	-3.08649	0.00202532	0.0075324		sulfate transporter	S2611_MOUSESodium-independent sulfate anion transporter OS=Mus musculus OX=10090 GN=Slc26a11 PE=2 SV=2	INVnr_XP_001842365.1_sulfate_transporter_[Culex_quinquefasciatus]
CPIJ008449	strumpellin	44.827	-1.28929	0.265581	-4.85459	1.21e-06	1.06e-05	cqu04144	WASH complex subunit strumpellin	WASC5_XENTRWASH complex subunit 5 OS=Xenopus tropicalis OX=8364 GN=washc5 PE=2 SV=1	INVnr_XP_001849993.1_strumpellin_[Culex_quinquefasciatus]
CPIJ013122	phospholipase D2	76.6638	-1.29589	0.235826	-5.49509	3.91e-08	4.68e-07	cqu00564,cqu00565,cqu01100,cqu04144	phospholipase D2	PLD1_HUMANPhospholipase D1 OS=Homo sapiens OX=9606 GN=PLD1 PE=1 SV=1	INVnr_XP_001863263.1_phospholipase_D2_[Culex_quinquefasciatus]
CPIJ018632	glutathione-s-transferase theta, gst	105.554	-1.29788	0.194167	-6.68436	2.32e-11	4.88e-10	cqu00480,cqu00980,cqu00982	glutathione-s-transferase gst	GSTT1_MANSEGlutathione S-transferase 1 OS=Manduca sexta OX=7130 GN=GST1 PE=2 SV=1	INVnr_XP_001868775.1_glutathione-s-transferase_theta,_gst_[Culex_quinquefasciatus]
CPIJ011730	f-box/leucine rich repeat protein	11.7124	-1.29859	0.432664	-3.00138	0.0026876	0.00957584		F-box LRR-repeat 20	FXL20_HUMANF-box LRR-repeat 20 OS=Homo sapiens OX=9606 GN=FBXL20 PE=1 SV=2	INVnr_XP_001862087.1_f-box/leucine_rich_repeat_protein_[Culex_quinquefasciatus]
CPIJ003638	conserved hypothetical protein	14.946	-1.302	0.397894	-3.27223	0.00106703	0.0043396		RNA-binding 40	U1165_ARATHU11 U12 small nuclear ribonucleo 65 kDa OS=Arabidopsis thaliana OX=3702 GN=SNRNP65 PE=1 SV=1	INVnr_XP_001845417.1_conserved_hypothetical_protein_[Culex_quinquefasciatus]
CPIJ017812	hexokinase	171.662	-1.30394	0.178094	-7.32166	2.45e-13	6.87e-12	cqu00010,cqu00051,cqu00052,cqu00500,cqu00520,cqu01100,cqu01200	hexokinase type 2 isoform X5	HXK2_DROMEHexokinase type 2 OS=Drosophila melanogaster OX=7227 GN=Hex-t2 PE=2 SV=4	INVnr_XP_001868045.1_hexokinase_[Culex_quinquefasciatus]
CPIJ015064	conserved hypothetical protein	7.94827	-1.30437	0.489165	-2.66653	0.00766385	0.0234002		ankyrin SAM and basic leucine zipper domain-containing 1	ASZ1_ORNANAnkyrin SAM and basic leucine zipper domain-containing 1 OS=Ornithorhynchus anatinus OX=9258 GN=ASZ1 PE=3 SV=1	INVnr_XP_001865228.1_conserved_hypothetical_protein_[Culex_quinquefasciatus]
CPIJ000500	conserved hypothetical protein	613.51	-1.30488	0.387772	-3.36508	0.000765227	0.00327875		conserved hypothetical protein	---NA---	INVnr_XP_001842170.1_conserved_hypothetical_protein_[Culex_quinquefasciatus]
CPIJ003653	myoneurin	10.1368	-1.30651	0.462154	-2.827	0.00469865	0.0153869		zinc finger 883-like	ZN347_HUMANZinc finger 347 OS=Homo sapiens OX=9606 GN=ZNF347 PE=1 SV=2	INVnr_XP_001845432.1_myoneurin_[Culex_quinquefasciatus]
CPIJ003708	conserved hypothetical protein	137.455	-1.30909	0.192615	-6.79639	1.07e-11	2.35e-10		conserved hypothetical protein	---NA---	INVnr_XP_001845535.1_conserved_hypothetical_protein_[Culex_quinquefasciatus]
CPIJ007516	thiamine transporter 1	32.3754	-1.31404	0.298942	-4.39564	1.1e-05	7.84e-05		thiamine transporter 2-like	S19A3_HUMANThiamine transporter 2 OS=Homo sapiens OX=9606 GN=SLC19A3 PE=1 SV=1	INVnr_XP_001849330.1_thiamine_transporter_1_[Culex_quinquefasciatus]
CPIJ015177	serine/threonine-protein kinase OSR1	71.4284	-1.31518	0.228793	-5.74835	9.01e-09	1.24e-07		serine threonine- kinase OSR1	OXSR1_PONABSerine threonine- kinase OSR1 OS=Pongo abelii OX=9601 GN=OXSR1 PE=2 SV=1	INVnr_XP_001865646.1_serine/threonine-protein_kinase_OSR1_[Culex_quinquefasciatus]
CPIJ020016	conserved hypothetical protein	14.8875	-1.31806	0.415838	-3.16966	0.00152616	0.00589577		tubulin polyglutamylase TTLL4 isoform X3	TTLL4_MOUSETubulin polyglutamylase TTLL4 OS=Mus musculus OX=10090 GN=Ttll4 PE=2 SV=3	INVnr_XP_001870313.1_conserved_hypothetical_protein_[Culex_quinquefasciatus]
CPIJ006344	conserved hypothetical protein	28.5924	-1.32003	0.327374	-4.03219	5.53e-05	0.000326346		conserved hypothetical protein	---NA---	INVnr_XP_001847881.1_conserved_hypothetical_protein_[Culex_quinquefasciatus]
CPIJ000065	cell division protein kinase 5	7.44453	-1.32339	0.497825	-2.65834	0.00785257	0.023842		cyclin-dependent kinase 5 homolog	CDK5_GLOMMCyclin-dependent kinase 5 homolog OS=Glossina morsitans morsitans OX=37546 GN=Cdk5 PE=2 SV=1	INVnr_XP_001841735.1_cell_division_protein_kinase_5_[Culex_quinquefasciatus]
CPIJ013212	conserved hypothetical protein	38.4533	-1.32523	0.281293	-4.7112	2.46e-06	2.02e-05		DCN1 4 isoform X1	DCNL4_MOUSEDCN1 4 OS=Mus musculus OX=10090 GN=Dcun1d4 PE=2 SV=1	INVnr_XP_001863336.1_conserved_hypothetical_protein_[Culex_quinquefasciatus]
CPIJ016563	prophenoloxidase	26.0035	-1.32583	0.335841	-3.94778	7.89e-05	0.000445993		phenoloxidase subunit 1	PPO2_DROMEPhenoloxidase 2 OS=Drosophila melanogaster OX=7227 GN=PPO2 PE=1 SV=1	INVnr_XP_001867411.1_prophenoloxidase_[Culex_quinquefasciatus]
CPIJ016900	ns1 binding protein	378.048	-1.32616	0.13898	-9.54208	1.4e-21	9.76e-20		ns1 binding	NS1BP_HUMANInfluenza virus NS1A-binding OS=Homo sapiens OX=9606 GN=IVNS1ABP PE=1 SV=3	INVnr_XP_001867026.1_ns1_binding_protein_[Culex_quinquefasciatus]
CPIJ020244	conserved hypothetical protein	64.172	-1.33	0.241556	-5.50599	3.67e-08	4.45e-07	cqu04150	CD98hc amino acid transporter	4F2_RABIT4F2 cell-surface antigen heavy chain OS=Oryctolagus cuniculus OX=9986 GN=SLC3A2 PE=1 SV=2	INVnr_XP_001870546.1_conserved_hypothetical_protein_[Culex_quinquefasciatus]
CPIJ019404	WD repeat domain 70	9.41151	-1.33016	0.463795	-2.86798	0.00413098	0.0138039		WD repeat domain 70	GAD1_DROMEGastrulation defective 1 homolog OS=Drosophila melanogaster OX=7227 GN=CG5543 PE=2 SV=1	INVnr_XP_001869742.1_WD_repeat_domain_70_[Culex_quinquefasciatus]
CPIJ018855	specifically Rac-associated protein, putative	14.6828	-1.33241	0.406254	-3.27976	0.00103896	0.0042352	cqu03013	cytoplasmic FMR1-interacting	CYFIP_DROMECytoplasmic FMR1-interacting OS=Drosophila melanogaster OX=7227 GN=Sra-1 PE=1 SV=1	INVnr_XP_001869329.1_specifically_Rac-associated_protein_[Culex_quinquefasciatus]
CPIJ005630	conserved hypothetical protein	1234.81	-1.3325	0.107967	-12.3417	5.4e-35	1e-32		conserved hypothetical protein	PCD16_RATProtocadherin-16 OS=Rattus norvegicus OX=10116 GN=Dchs1 PE=3 SV=2	INVnr_XP_001847510.1_conserved_hypothetical_protein_[Culex_quinquefasciatus]
CPIJ009381	NF-180, putative	8.76546	-1.33452	0.481838	-2.76963	0.00561193	0.0178628		transcription elongation regulator 1-like	SWT1_HUMANTranscriptional SWT1 OS=Homo sapiens OX=9606 GN=SWT1 PE=2 SV=1	INVnr_XP_001850975.1_NF-180_[Culex_quinquefasciatus]
CPIJ012929	conserved hypothetical protein	40.1963	-1.33631	0.280782	-4.75925	1.94e-06	1.62e-05		dopamine N-acetyltransferase	DNAT_DROMEDopamine N-acetyltransferase OS=Drosophila melanogaster OX=7227 GN=AANAT1 PE=1 SV=1	INVnr_XP_001863216.1_conserved_hypothetical_protein_[Culex_quinquefasciatus]
CPIJ013194	conserved hypothetical protein	23.841	-1.33809	0.358562	-3.73181	0.000190109	0.000966877		conserved hypothetical protein	---NA---	INVnr_XP_001864105.1_conserved_hypothetical_protein_[Culex_quinquefasciatus]
CPIJ001375	conserved hypothetical protein	24.092	-1.33981	0.341251	-3.92616	8.63e-05	0.000482523		homeobox Nkx-	---NA---	INVnr_XP_001843273.1_conserved_hypothetical_protein_[Culex_quinquefasciatus]
CPIJ005501	mmr1/hsr1 GTP binding protein	143.323	-1.34018	0.187711	-7.13961	9.36e-13	2.45e-11		mmr1 hsr1 GTP binding	GNL1_MACMUGuanine nucleotide-binding -like 1 OS=Macaca mulatta OX=9544 GN=GNL1 PE=3 SV=1	INVnr_XP_001846978.1_mmr1/hsr1_GTP_binding_protein_[Culex_quinquefasciatus]
CPIJ010646	conserved hypothetical protein	4.80369	-1.34323	0.559261	-2.40179	0.0163152	0.0442868		zinc finger and BTB domain-containing 24	ZN287_HUMANZinc finger 287 OS=Homo sapiens OX=9606 GN=ZNF287 PE=2 SV=1	INVnr_XP_001854413.1_conserved_hypothetical_protein_[Culex_quinquefasciatus]
CPIJ003876	conserved hypothetical protein	5.66393	-1.34507	0.54361	-2.47433	0.0133485	0.0371794		conserved hypothetical protein	---NA---	INVnr_XP_001845544.1_conserved_hypothetical_protein_[Culex_quinquefasciatus]
CPIJ011248	multiple inositol polyphosphate phosphatase 1 precursor	50.693	-1.34689	0.254995	-5.28202	1.28e-07	1.37e-06	cqu00010,cqu00562,cqu01100	multiple inositol polyphosphate phosphatase 1	MINP1_DROMEMultiple inositol polyphosphate phosphatase 1 OS=Drosophila melanogaster OX=7227 GN=Mipp1 PE=1 SV=2	INVnr_XP_001861930.1_multiple_inositol_polyphosphate_phosphatase_1_[Culex_quinquefasciatus]
CPIJ001654	n-acetylgalactosaminyltransferase, putative	17.2276	-1.3493	0.379561	-3.55489	0.000378131	0.00176746		polypeptide N-acetylgalactosaminyltransferase 16-like	GLT16_MOUSEPolypeptide N-acetylgalactosaminyltransferase 16 OS=Mus musculus OX=10090 GN=Galnt16 PE=2 SV=2	INVnr_XP_001843194.1_N-acetylgalactosaminyltransferase_[Culex_quinquefasciatus]
CPIJ001968	orfY, putative	20.4142	-1.35111	0.356744	-3.78734	0.000152271	0.000793341		N-acetylserotonin O-methyltransferase	ASML_HUMANN-acetylserotonin O-methyltransferase OS=Homo sapiens OX=9606 GN=ASMTL PE=1 SV=3	INVnr_XP_001843745.1_conserved_hypothetical_protein_[Culex_quinquefasciatus]
CPIJ016410	conserved hypothetical protein	10.9365	-1.35222	0.447096	-3.02444	0.0024909	0.00897488		alpha- kinase 1	---NA---	INVnr_XP_001866520.1_conserved_hypothetical_protein_[Culex_quinquefasciatus]
CPIJ002740	conserved hypothetical protein	7439.14	-1.35303	0.131805	-10.2654	1.01e-24	9.87e-23		Niemann-Pick Type C-2	---NA---	INVnr_XP_001844323.1_conserved_hypothetical_protein_[Culex_quinquefasciatus]
CPIJ008660	ets domain-containing protein	48.799	-1.35352	0.264707	-5.11329	3.17e-07	3.14e-06	cqu04013,cqu04320	ETS pointed isoform X2	ETS1B_XENLA c-ets-1-B (Fragment) OS=Xenopus laevis OX=8355 GN=ets1-b PE=2 SV=1	INVnr_XP_001850228.1_ets_domain-containing_protein_[Culex_quinquefasciatus]
CPIJ007754	rac serine/threonine kinase	20.575	-1.35413	0.355813	-3.80574	0.000141381	0.0007432	cqu04068,cqu04140,cqu04150,cqu04213,cqu04933	RAC serine threonine- kinase	AKT1_DROMERAC serine threonine- kinase OS=Drosophila melanogaster OX=7227 GN=Akt1 PE=1 SV=3	INVnr_XP_001849257.1_rac_serine/threonine_kinase_[Culex_quinquefasciatus]
CPIJ020183	folate carrier protein	6.38968	-1.35475	0.523129	-2.5897	0.00960594	0.0282202		folate carrier	MFTC_HUMANMitochondrial folate transporter carrier OS=Homo sapiens OX=9606 GN=SLC25A32 PE=1 SV=2	INVnr_XP_001870634.1_folate_carrier_protein_[Culex_quinquefasciatus]
CPIJ000260	p130CAS	18.6083	-1.35537	0.37357	-3.62817	0.000285438	0.00138092		breast cancer anti-estrogen resistance 1 isoform X1	BCAR1_HUMANBreast cancer anti-estrogen resistance 1 OS=Homo sapiens OX=9606 GN=BCAR1 PE=1 SV=2	INVnr_XP_001841833.1_p130CAS_[Culex_quinquefasciatus]
CPIJ011376	hypothetical protein	462.911	-1.35712	0.374654	-3.62233	0.000291961	0.00140861		hypothetical protein CpipJ_CPIJ011376	---NA---	INVnr_XP_001861614.1_hypothetical_protein_CpipJ_CPIJ011376_[Culex_quinquefasciatus]
CPIJ007543	conserved hypothetical protein	13.5164	-1.3588	0.414016	-3.282	0.00103073	0.00420652		transcriptional repressor p66-beta isoform X2	P66B_MOUSETranscriptional repressor p66-beta OS=Mus musculus OX=10090 GN=Gatad2b PE=1 SV=1	INVnr_XP_001849659.1_conserved_hypothetical_protein_[Culex_quinquefasciatus]
CPIJ004644	sorting nexin	14.1324	-1.36029	0.41658	-3.26537	0.00109321	0.00442817		sorting nexin-17	SNX17_HUMANSorting nexin-17 OS=Homo sapiens OX=9606 GN=SNX17 PE=1 SV=1	INVnr_XP_001846179.1_sorting_nexin_[Culex_quinquefasciatus]
CPIJ005945	phosphatidylinositol N-acetylglucosaminyltransferase subunit Q	26.1903	-1.36175	0.330793	-4.11663	3.84e-05	0.000238387	cqu00563,cqu01100	phosphatidyl inositol N-acetylglucosaminyl transferase subunit Q	PIGQ_HUMANPhosphatidylinositol N-acetylglucosaminyltransferase subunit Q OS=Homo sapiens OX=9606 GN=PIGQ PE=1 SV=3	INVnr_XP_001847393.1_phosphatidyl_inositol_N-acetylglucosaminyl_transferase_subunit_Q_[Culex_quinquefasciatus]
CPIJ009141	nuclear pore complex protein nup214	51.1256	-1.36232	0.257725	-5.28597	1.25e-07	1.34e-06	cqu03013	nuclear pore complex nup214	NU214_DROMENuclear pore complex Nup214 OS=Drosophila melanogaster OX=7227 GN=Nup214 PE=1 SV=2	INVnr_XP_001850803.1_nuclear_pore_complex_protein_nup214_[Culex_quinquefasciatus]
CPIJ014416	conserved hypothetical protein	99.2183	-1.36509	0.201292	-6.78165	1.19e-11	2.58e-10		FACT complex subunit spt16-like isoform X1	SPT16_DROMEFACT complex subunit spt16 OS=Drosophila melanogaster OX=7227 GN=dre4 PE=1 SV=2	INVnr_XP_001864604.1_conserved_hypothetical_protein_[Culex_quinquefasciatus]
CPIJ018588	conserved hypothetical protein	22.2084	-1.36689	0.353338	-3.86849	0.00010951	0.000597511		PAX-interacting 1-like	PAXI1_XENLAPAX-interacting 1 OS=Xenopus laevis OX=8355 GN=paxip1 PE=1 SV=1	INVnr_XP_001868827.1_conserved_hypothetical_protein_[Culex_quinquefasciatus]
CPIJ006407	unkempt protein	18.4884	-1.36804	0.389757	-3.50998	0.000448148	0.00204851		RING finger unkempt-like isoform X3	UNK_DROMERING finger unkempt OS=Drosophila melanogaster OX=7227 GN=unk PE=1 SV=1	INVnr_XP_001848280.1_unkempt_protein_[Culex_quinquefasciatus]
CPIJ015695	D330012F22Rik protein	34.4037	-1.36878	0.306939	-4.45946	8.22e-06	5.98e-05		GDP-D-glucose phosphorylase 1	GDPP1_DANREGDP-D-glucose phosphorylase 1 OS=Danio rerio OX=7955 GN=gdpgp1 PE=2 SV=1	INVnr_XP_001865912.1_D330012F22Rik_protein_[Culex_quinquefasciatus]
CPIJ012100	conserved hypothetical protein	12.2301	-1.36906	0.448052	-3.05559	0.00224616	0.00824059		transcription factor hamlet-like	HAM_DROMETranscription factor hamlet OS=Drosophila melanogaster OX=7227 GN=ham PE=2 SV=1	INVnr_XP_001862948.1_conserved_hypothetical_protein_[Culex_quinquefasciatus]
CPIJ009795	conserved hypothetical protein	109.846	-1.36924	0.211394	-6.47721	9.34e-11	1.78e-09	cqu04310,cqu04350,cqu04391	myc -like	MYC_DROMEMyc OS=Drosophila melanogaster OX=7227 GN=Myc PE=1 SV=2	INVnr_XP_001853504.1_conserved_hypothetical_protein_[Culex_quinquefasciatus]
CPIJ002663	glutathione S-transferase 1-1	494.298	-1.36972	0.147477	-9.28773	1.58e-20	1.04e-18		glutathione S-transferase 1-1	GST1D_ANOGAGlutathione S-transferase isoform D OS=Anopheles gambiae OX=7165 GN= 1 PE=1 SV=1	INVnr_XP_001844246.1_glutathione_S-transferase_1-1_[Culex_quinquefasciatus]
CPIJ018048	frizzled-2 precursor	45.1948	-1.37164	0.286864	-4.78148	1.74e-06	1.47e-05	cqu04150,cqu04310	frizzled-2	FRIZ2_DROMEFrizzled-2 OS=Drosophila melanogaster OX=7227 GN=fz2 PE=1 SV=1	INVnr_XP_001868222.1_frizzled-2_[Culex_quinquefasciatus]
CPIJ001346	conserved hypothetical protein	49.183	-1.3728	0.26555	-5.16966	2.35e-07	2.39e-06		another transcription unit	ATU_DROMEAnother transcription unit OS=Drosophila melanogaster OX=7227 GN=Atu PE=1 SV=2	INVnr_XP_001843124.1_conserved_hypothetical_protein_[Culex_quinquefasciatus]
CPIJ007342	conserved hypothetical protein	31.0159	-1.37364	0.31028	-4.42711	9.55e-06	6.86e-05		isoform A	SETD4_MOUSESET domain-containing 4 OS=Mus musculus OX=10090 GN=Setd4 PE=2 SV=1	INVnr_XP_001849144.1_conserved_hypothetical_protein_[Culex_quinquefasciatus]
CPIJ005884	eukaryotic translation initiation factor 2-alpha kinase 1	27.7105	-1.37375	0.325402	-4.2217	2.42e-05	0.000157125	cqu04140,cqu04141	eukaryotic translation initiation factor 2-alpha kinase 1	E2AK4_RA -2-alpha kinase GCN2 OS=Rattus norvegicus OX=10116 GN=Eif2ak4 PE=3 SV=2	INVnr_XP_001847709.1_eukaryotic_translation_initiation_factor_2-alpha_kinase_1_[Culex_quinquefasciatus]
CPIJ014021	cramped protein	12.0623	-1.37812	0.444801	-3.09829	0.00194641	0.00727735		cramped protein	CRM_DROSE cramped OS=Drosophila sechellia OX=7238 GN=crm PE=3 SV=1	INVnr_XP_001864038.1_cramped_protein_[Culex_quinquefasciatus]
CPIJ000949	structural maintenance of chromosomes smc4	5.68506	-1.37877	0.540148	-2.55258	0.010693	0.0307309		structural maintenance of chromosomes smc4	SMC4_XENLAStructural maintenance of chromosomes 4 OS=Xenopus laevis OX=8355 GN=smc4 PE=1 SV=1	INVnr_XP_001842620.1_structural_maintenance_of_chromosomes_smc4_[Culex_quinquefasciatus]
CPIJ009398	conserved hypothetical protein	48.8266	-1.38025	0.299232	-4.61264	3.98e-06	3.09e-05		conserved hypothetical protein	ASB7_HUMANAnkyrin repeat and SOCS box 7 OS=Homo sapiens OX=9606 GN=ASB7 PE=1 SV=2	INVnr_XP_001850992.1_conserved_hypothetical_protein_[Culex_quinquefasciatus]
CPIJ001911	fidipidine	44.1959	-1.38114	0.275169	-5.01924	5.19e-07	4.92e-06		coiled-coil domain-containing 93 isoform X2	CCD93_XENTRCoiled-coil domain-containing 93 OS=Xenopus tropicalis OX=8364 GN=ccdc93 PE=2 SV=1	INVnr_XP_001843688.1_fidipidine_[Culex_quinquefasciatus]
CPIJ015633	conserved hypothetical protein	5.17072	-1.38355	0.555423	-2.49099	0.0127387	0.0357353		probable serine threonine- kinase kinX	---NA---	INVnr_XP_001865894.1_conserved_hypothetical_protein_[Culex_quinquefasciatus]
CPIJ007645	conserved hypothetical protein	321.586	-1.38626	0.145248	-9.54408	1.37e-21	9.67e-20		conserved hypothetical protein	---NA---	INVnr_XP_001849173.1_conserved_hypothetical_protein_[Culex_quinquefasciatus]
CPIJ011862	zinc finger protein	9.17719	-1.38646	0.483538	-2.86733	0.0041395	0.0138258		zinc finger	ZN551_HUMANZinc finger 551 OS=Homo sapiens OX=9606 GN=ZNF551 PE=1 SV=3	INVnr_XP_001862237.1_zinc_finger_protein_[Culex_quinquefasciatus]
CPIJ001243	conserved hypothetical protein	18.2533	-1.38851	0.375096	-3.70175	0.000214119	0.00106908		alkylated DNA repair alkB homolog 8-like	ALKB8_XENTRAlkylated DNA repair alkB homolog 8 OS=Xenopus tropicalis OX=8364 GN=alkbh8 PE=2 SV=2	INVnr_XP_001842912.1_conserved_hypothetical_protein_[Culex_quinquefasciatus]
CPIJ010920	conserved hypothetical protein	180.546	-1.39287	0.185513	-7.5082	5.99e-14	1.85e-12		E3 UFM1- ligase 1 homolog	UFL1_CULQUE3 UFM1- ligase 1 homolog OS=Culex quinquefasciatus OX=7176 GN=CPIJ010920 PE=3 SV=1	INVnr_XP_001857545.1_conserved_hypothetical_protein_[Culex_quinquefasciatus]
CPIJ009395	speckle-type poz protein	7.1626	-1.39341	0.512822	-2.71714	0.00658497	0.0205332		speckle-type poz	SPOPL_MOUSESpeckle-type POZ -like OS=Mus musculus OX=10090 GN=Spopl PE=2 SV=3	INVnr_XP_001850989.1_speckle-type_poz_protein_[Culex_quinquefasciatus]
CPIJ000597	conserved hypothetical protein	13.769	-1.3941	0.417631	-3.33811	0.000843515	0.00354508		proteoglycan 4-like	---NA---	INVnr_XP_001842360.1_conserved_hypothetical_protein_[Culex_quinquefasciatus]
CPIJ001080	leucine-rich repeat-containing protein 40	40.0925	-1.3943	0.287904	-4.84292	1.28e-06	1.11e-05		leucine-rich repeat-containing 40	LRC40_DANRELeucine-rich repeat-containing 40 OS=Danio rerio OX=7955 GN=lrrc40 PE=2 SV=1	INVnr_XP_001842749.1_leucine-rich_repeat-containing_protein_40_[Culex_quinquefasciatus]
CPIJ017907	F-box/WD repeat protein 11	3.69074	-1.39471	0.593051	-2.35175	0.0186855	0.049556	cqu04120,cqu04310,cqu04341,cqu04624	f-box and wd-40 domain	FBW1A_HUMANF-box WD repeat-containing 1A OS=Homo sapiens OX=9606 GN=BTRC PE=1 SV=1	INVnr_XP_001867591.1_f-box_and_wd-40_domain_protein_[Culex_quinquefasciatus]
CPIJ001569	conserved hypothetical protein	216.32	-1.40141	0.188259	-7.44406	9.76e-14	2.91e-12		conserved hypothetical protein	---NA---	INVnr_XP_001843053.1_conserved_hypothetical_protein_[Culex_quinquefasciatus]
CPIJ012946	conserved hypothetical protein	54.4592	-1.40294	0.25519	-5.4976	3.85e-08	4.63e-07		conserved hypothetical protein	KALRN_HUMANKalirin OS=Homo sapiens OX=9606 GN=KALRN PE=1 SV=2	INVnr_XP_001863012.1_conserved_hypothetical_protein_[Culex_quinquefasciatus]
CPIJ013870	hypothetical protein	19.7908	-1.40588	0.365854	-3.84273	0.000121675	0.000655762		hypothetical protein CpipJ_CPIJ013870	---NA---	INVnr_XP_001864113.1_hypothetical_protein_CpipJ_CPIJ013870_[Culex_quinquefasciatus]
CPIJ000636	zinc finger protein 271	9.76864	-1.40612	0.460625	-3.05264	0.00226837	0.00830348		zinc finger 271	ZN729_HUMANZinc finger 729 OS=Homo sapiens OX=9606 GN=ZNF729 PE=2 SV=4	INVnr_XP_001842399.1_zinc_finger_protein_271_[Culex_quinquefasciatus]
CPIJ004198	conserved hypothetical protein	8.72356	-1.40622	0.490816	-2.86506	0.00416929	0.0139055		furry isoform X1	FRY_DROME furry OS=Drosophila melanogaster OX=7227 GN=fry PE=1 SV=2	INVnr_XP_001846211.1_conserved_hypothetical_protein_[Culex_quinquefasciatus]
CPIJ001085	low molecular weight protein-tyrosine-phosphatase	6.49762	-1.40662	0.51992	-2.70546	0.00682104	0.021129	cqu00730,cqu00740,cqu01100	low molecular weight -tyrosine-phosphatase	PPAC1_DROMELow molecular weight phosphotyrosine phosphatase 1 OS=Drosophila melanogaster OX=7227 GN=primo-1 PE=2 SV=1	INVnr_XP_001842754.1_low_molecular_weight_protein-tyrosine-phosphatase_[Culex_quinquefasciatus]
CPIJ007313	myotubularin	131.646	-1.40765	0.19493	-7.22132	5.15e-13	1.41e-11	cqu00562,cqu01100,cqu04070,cqu04140	myotubularin-related 4 isoform X5	MTMR3_HUMANMyotubularin-related 3 OS=Homo sapiens OX=9606 GN=MTMR3 PE=1 SV=3	INVnr_XP_001848681.1_myotubularin_[Culex_quinquefasciatus]
CPIJ000291	conserved hypothetical protein	23.8613	-1.40767	0.344672	-4.08408	4.43e-05	0.000270349	cqu04391,cqu04392	transcriptional coactivator yorkie isoform X1	YAP1_ORYLATranscriptional coactivator YAP1 OS=Oryzias latipes OX=8090 GN=yap1 PE=1 SV=2	INVnr_XP_001841864.1_conserved_hypothetical_protein_[Culex_quinquefasciatus]
CPIJ000005	malate synthase	276.204	-1.40841	0.173688	-8.10883	5.11e-16	2e-14		malate synthase	MASY_DICDIMalate synthase OS=Dictyostelium discoideum OX=44689 GN=masA PE=2 SV=2	INVnr_XP_001841675.1_malate_synthase_[Culex_quinquefasciatus]
CPIJ007271	polybromo-1	35.9622	-1.41077	0.291816	-4.83444	1.34e-06	1.16e-05		polybromo-1-like isoform X2	PB1_HUMAN polybromo-1 OS=Homo sapiens OX=9606 GN=PBRM1 PE=1 SV=1	INVnr_XP_001848807.1_polybromo-1_[Culex_quinquefasciatus]
CPIJ009998	transcriptional regulator ATRX, putative	102.613	-1.41087	0.202297	-6.97427	3.07e-12	7.37e-11		transcriptional regulator ATRX homolog	ATRX_DROMETranscriptional regulator ATRX homolog OS=Drosophila melanogaster OX=7227 GN=XNP PE=1 SV=2	INVnr_XP_001853354.1_transcriptional_regulator_ATRX_[Culex_quinquefasciatus]
CPIJ007521	structural maintenance of chromosomes protein 6	20.929	-1.41236	0.369684	-3.82045	0.000133209	0.000708171		structural maintenance of chromosomes 6	SMC6B_ARATHStructural maintenance of chromosomes 6B OS=Arabidopsis thaliana OX=3702 GN=SMC6B PE=2 SV=1	INVnr_XP_001849335.1_structural_maintenance_of_chromosomes_protein_6_[Culex_quinquefasciatus]
CPIJ005104	conserved hypothetical protein	9.7747	-1.41339	0.460737	-3.06766	0.00215741	0.00796897		PDZ domain-containing 8	PDZD8_HUMANPDZ domain-containing 8 OS=Homo sapiens OX=9606 GN=PDZD8 PE=1 SV=1	INVnr_XP_001846914.1_conserved_hypothetical_protein_[Culex_quinquefasciatus]
CPIJ009140	conserved hypothetical protein	10.6179	-1.41375	0.454688	-3.10929	0.0018754	0.00704926	cqu03018	CCR4-NOT transcription complex subunit 10	CNO10_DROMECCR4-NOT transcription complex subunit 10 OS=Drosophila melanogaster OX=7227 GN=Not10 PE=1 SV=1	INVnr_XP_001850802.1_conserved_hypothetical_protein_[Culex_quinquefasciatus]
CPIJ012798	conserved hypothetical protein	10.6021	-1.41501	0.457403	-3.09356	0.00197769	0.00738253		mantle -like	---NA---	INVnr_XP_001862978.1_conserved_hypothetical_protein_[Culex_quinquefasciatus]
CPIJ006677	conserved hypothetical protein	19.2362	-1.41554	0.369679	-3.82912	0.000128603	0.000686795		nose resistant to fluoxetine 6-like	NRF6_CAEELNose resistant to fluoxetine 6 OS=Caenorhabditis elegans OX=6239 GN=nrf-6 PE=1 SV=3	INVnr_XP_001848235.1_conserved_hypothetical_protein_[Culex_quinquefasciatus]
CPIJ005698	n-acetylgalactosaminyltransferase	42.6941	-1.42002	0.290356	-4.89062	1.01e-06	8.92e-06		N-acetyl galactosaminyl transferase	GALT9_DROME polypeptide N-acetylgalactosaminyltransferase 9 OS=Drosophila melanogaster OX=7227 GN=pgant9 PE=2 SV=2	INVnr_XP_001847121.1_N-acetyl_galactosaminyl_transferase_[Culex_quinquefasciatus]
CPIJ009643	cleavage and polyadenylation specificity factor subunit 2	30.4253	-1.42027	0.314053	-4.52239	6.11e-06	4.58e-05	cqu03015	probable cleavage and polyadenylation specificity factor subunit 2	CPSF2_DROMEProbable cleavage and polyadenylation specificity factor subunit 2 OS=Drosophila melanogaster OX=7227 GN=Cpsf100 PE=1 SV=1	INVnr_XP_001850949.1_cleavage_and_polyadenylation_specificity_factor_subunit_2_[Culex_quinquefasciatus]
CPIJ013989	synaptic ras gtpase activating protein	40.8149	-1.42039	0.278881	-5.0932	3.52e-07	3.46e-06		probable Ras GTPase-activating	GAP2_DROMEProbable Ras GTPase-activating OS=Drosophila melanogaster OX=7227 GN=CG42684 PE=1 SV=3	INVnr_XP_001864050.1_synaptic_ras_GTPase_activating_protein_[Culex_quinquefasciatus]
CPIJ010386	protease m50 membrane-bound transcription factor site 2 protease	4.45594	-1.42089	0.571869	-2.48464	0.0129683	0.0362495	cqu04141	protease m50 membrane-bound transcription factor site 2 protease	MBTP2_MOUSEMembrane-bound transcription factor site-2 protease OS=Mus musculus OX=10090 GN=Mbtps2 PE=2 SV=1	INVnr_XP_001870882.1_protease_m50_membrane-bound_transcription_factor_site_2_protease_[Culex_quinquefasciatus]
CPIJ009241	conserved hypothetical protein	16.4428	-1.42153	0.392039	-3.62599	0.000287854	0.00139166		FIT family CG10671-like	FITM_DROMEFIT family CG10671 OS=Drosophila melanogaster OX=7227 GN=CG10671 PE=1 SV=1	INVnr_XP_001851151.1_conserved_hypothetical_protein_[Culex_quinquefasciatus]
CPIJ004212	phosphorylase b kinase regulatory subunit beta	87.4271	-1.42618	0.210631	-6.77099	1.28e-11	2.75e-10		probable phosphorylase b kinase regulatory subunit beta isoform X6	KPBB_DROMEProbable phosphorylase b kinase regulatory subunit beta OS=Drosophila melanogaster OX=7227 GN=CG8475 PE=2 SV=2	INVnr_XP_001846225.1_phosphorylase_b_kinase_regulatory_subunit_beta_[Culex_quinquefasciatus]
CPIJ013121	conserved hypothetical protein	27.0163	-1.42625	0.32951	-4.32839	1.5e-05	0.000103585		---NA---	---NA---	INVnr_XP_001863262.1_conserved_hypothetical_protein_[Culex_quinquefasciatus]
CPIJ005796	tensin	5.68974	-1.42792	0.538391	-2.6522	0.00799697	0.0241762		tensin	---NA---	INVnr_XP_001847280.1_tensin_[Culex_quinquefasciatus]
CPIJ011774	neurofibromin	17.1698	-1.43017	0.384666	-3.71795	0.000200849	0.00101341		---NA---	NF1_RATNeurofibromin OS=Rattus norvegicus OX=10116 GN=Nf1 PE=1 SV=1	INVnr_XP_001862517.1_neurofibromin_[Culex_quinquefasciatus]
CPIJ000904	conserved hypothetical protein	12.9005	-1.43055	0.431381	-3.3162	0.000912509	0.00378101	cqu03460	Fanconi anemia group I	FANCI_HUMANFanconi anemia group I OS=Homo sapiens OX=9606 GN=FANCI PE=1 SV=4	INVnr_XP_001842527.1_conserved_hypothetical_protein_[Culex_quinquefasciatus]
CPIJ017455	conserved hypothetical protein	16.1459	-1.43119	0.396279	-3.61157	0.000304352	0.0014584		basic proline-rich	CREST_XENLACalcium-responsive transactivator OS=Xenopus laevis OX=8355 GN=ss18l1 PE=2 SV=1	INVnr_XP_001867613.1_conserved_hypothetical_protein_[Culex_quinquefasciatus]
CPIJ016094	conserved hypothetical protein	115.661	-1.43125	0.191065	-7.4909	6.84e-14	2.07e-12		osteopetrosis-associated transmembrane 1	OSTM1_MOUSEOsteopetrosis-associated transmembrane 1 OS=Mus musculus OX=10090 GN=Ostm1 PE=1 SV=1	INVnr_XP_001866623.1_conserved_hypothetical_protein_[Culex_quinquefasciatus]
CPIJ018900	conserved hypothetical protein	6.55878	-1.43151	0.524697	-2.72826	0.00636693	0.0199239		histone type 2	CENPA_NEUCRHistone H3-like centromeric hH3v OS=Neurospora crassa (strain ATCC 24698 74-OR23-1A CBS DSM 1257 FGSC 987) OX=367110 GN=hH3v PE=3 SV=1	INVnr_XP_001869113.1_conserved_hypothetical_protein_[Culex_quinquefasciatus]
CPIJ007814	myosin iii	73.5604	-1.43248	0.242717	-5.90186	3.59e-09	5.34e-08	cqu04745	myosin iii	MYO3A_HUMANMyosin-IIIa OS=Homo sapiens OX=9606 GN=MYO3A PE=1 SV=2	INVnr_XP_001849223.1_myosin_iii_[Culex_quinquefasciatus]
CPIJ006166	deltamethrin resistance-associated NYD-GBE	112.693	-1.43537	0.203666	-7.04766	1.82e-12	4.54e-11	cqu00500,cqu01100	deltamethrin resistance-associated NYD-GBE	GLGB_MOUSE1,4-alpha-glucan-branching enzyme OS=Mus musculus OX=10090 GN=Gbe1 PE=1 SV=1	INVnr_XP_001847610.1_deltamethrin_resistance-associated_NYD-GBE_[Culex_quinquefasciatus]
CPIJ017811	HPS	35.1135	-1.43782	0.297551	-4.83216	1.35e-06	1.17e-05		Hermansky-Pudlak syndrome 1 homolog isoform X2	HPS1_MACFAHermansky-Pudlak syndrome 1 homolog OS=Macaca fascicularis OX=9541 GN=HPS1 PE=2 SV=1	INVnr_XP_001868044.1_HPS_[Culex_quinquefasciatus]
CPIJ001794	conserved hypothetical protein	9.61807	-1.44101	0.472022	-3.05284	0.00226683	0.00830347		isoform A	MSL1_HUMANMale-specific lethal 1 homolog OS=Homo sapiens OX=9606 GN=MSL1 PE=1 SV=3	INVnr_XP_001843468.1_conserved_hypothetical_protein_[Culex_quinquefasciatus]
CPIJ010870	pre-mRNA-splicing factor SLU7	70.3816	-1.44659	0.228885	-6.32016	2.61e-10	4.6e-09	cqu03040	pre-mRNA-splicing factor SLU7	SLU7_DROMEPre-mRNA-splicing factor Slu7 OS=Drosophila melanogaster OX=7227 GN=Slu7 PE=1 SV=2	INVnr_XP_001870964.1_pre-mRNA-splicing_factor_SLU7_[Culex_quinquefasciatus]
CPIJ008946	sugar transporter	14.6329	-1.45119	0.418545	-3.46723	0.000525861	0.00235036		sugar transporter	TRET1_BOMMOFacilitated trehalose transporter Tret1 OS=Bombyx mori OX=7091 GN=Tret1 PE=1 SV=1	INVnr_XP_001850644.1_sugar_transporter_[Culex_quinquefasciatus]
CPIJ019027	phosphatidylinositol 4-kinase	10.0971	-1.45136	0.460334	-3.15284	0.00161689	0.00621014	cqu00562,cqu01100,cqu04070	phosphatidylinositol 4-kinase	PI4KB_DANREPhosphatidylinositol 4-kinase beta OS=Danio rerio OX=7955 GN=pi4kb PE=2 SV=2	INVnr_XP_001869596.1_phosphatidylinositol_4-kinase_[Culex_quinquefasciatus]
CPIJ005368	lysosomal trafficking regulator	57.2413	-1.45224	0.284264	-5.10876	3.24e-07	3.21e-06		lysosomal trafficking regulator	LYST_MOUSELysosomal-trafficking regulator OS=Mus musculus OX=10090 GN=Lyst PE=1 SV=1	INVnr_XP_001847317.1_lysosomal_trafficking_regulator_[Culex_quinquefasciatus]
CPIJ004417	4-hydroxyphenylpyruvate dioxygenase	17.464	-1.45432	0.424369	-3.42702	0.000610249	0.00267756	cqu00130,cqu00350,cqu00360,cqu01100	4-hydroxyphenylpyruvate dioxygenase	HPPD_DANRE4-hydroxyphenylpyruvate dioxygenase OS=Danio rerio OX=7955 GN=hpd PE=2 SV=1	INVnr_XP_001846003.1_4-hydroxyphenylpyruvate_dioxygenase_[Culex_quinquefasciatus]
CPIJ000772	zinc finger protein 189	10.1259	-1.45676	0.458147	-3.17967	0.00147441	0.00572533		zinc finger 189	ZNF35_HUMANZinc finger 35 OS=Homo sapiens OX=9606 GN=ZNF35 PE=1 SV=4	INVnr_XP_001842578.1_zinc_finger_protein_189_[Culex_quinquefasciatus]
CPIJ018689	glutamate receptor	6.80855	-1.46098	0.529426	-2.75956	0.00578794	0.018299		glutamate receptor	GRIK2_HUMANGlutamate receptor kainate 2 OS=Homo sapiens OX=9606 GN=GRIK2 PE=1 SV=1	INVnr_XP_001868841.1_glutamate_receptor_[Culex_quinquefasciatus]
CPIJ016156	conserved hypothetical protein	11.6107	-1.46492	0.438393	-3.34157	0.000833048	0.00351166		zinc finger MYND domain-containing 11	ZMY11_HUMANZinc finger MYND domain-containing 11 OS=Homo sapiens OX=9606 GN=ZMYND11 PE=1 SV=2	INVnr_XP_001866379.1_conserved_hypothetical_protein_[Culex_quinquefasciatus]
CPIJ003312	conserved hypothetical protein	83.3426	-1.46648	0.222589	-6.58828	4.45e-11	8.95e-10		MAP microtubule affinity-regulating kinase 3-like isoform X1	MKNK1_XENTRMAP kinase-interacting serine threonine- kinase 1 OS=Xenopus tropicalis OX=8364 GN=mknk1 PE=2 SV=1	INVnr_XP_001845038.1_conserved_hypothetical_protein_[Culex_quinquefasciatus]
CPIJ015672	Inhibitor of nuclear factor kappa B kinase beta subunit	91.99	-1.46668	0.208181	-7.04521	1.85e-12	4.61e-11	cqu04068,cqu04150,cqu04624	inhibitor of nuclear factor kappa-B kinase subunit alpha-like	IKKB_DROMEInhibitor of nuclear factor kappa-B kinase subunit beta OS=Drosophila melanogaster OX=7227 GN=IKKbeta PE=1 SV=2	INVnr_XP_001865661.1_inhibitor_of_nuclear_factor_kappa_B_kinase_beta_subunit_[Culex_quinquefasciatus]
CPIJ005802	conserved hypothetical protein	354.51	-1.46792	0.205976	-7.12666	1.03e-12	2.67e-11		conserved hypothetical protein	---NA---	INVnr_XP_001847286.1_conserved_hypothetical_protein_[Culex_quinquefasciatus]
CPIJ014043	conserved hypothetical protein	27.4594	-1.47184	0.328992	-4.4738	7.68e-06	5.61e-05	cqu03410,cqu04140	high mobility group DSP1-like	HMG2_DROMEHigh mobility group DSP1 OS=Drosophila melanogaster OX=7227 GN=Dsp1 PE=2 SV=1	INVnr_XP_001864141.1_conserved_hypothetical_protein_[Culex_quinquefasciatus]
CPIJ008258	alsin, putative	11.9191	-1.47528	0.444808	-3.31665	0.000911023	0.00377707		alsin homolog	ALS2_DROMEAlsin homolog OS=Drosophila melanogaster OX=7227 GN=Als2 PE=1 SV=1	INVnr_XP_001849634.1_alsin_[Culex_quinquefasciatus]
CPIJ014715	zinc finger protein	13.4113	-1.47678	0.426841	-3.45979	0.000540588	0.00240702		zinc finger	ZN782_HUMANZinc finger 782 OS=Homo sapiens OX=9606 GN=ZNF782 PE=2 SV=1	INVnr_XP_001865067.1_zinc_finger_protein_[Culex_quinquefasciatus]
CPIJ019360	predicted protein	16.0316	-1.47851	0.399677	-3.69926	0.00021623	0.00107794		predicted protein	---NA---	INVnr_XP_001869565.1_predicted_protein_[Culex_quinquefasciatus]
CPIJ016993	xaa-pro dipeptidase	177.256	-1.48259	0.190828	-7.76928	7.89e-15	2.73e-13		xaa-pro dipeptidase	PEPD_HUMANXaa-Pro dipeptidase OS=Homo sapiens OX=9606 GN=PEPD PE=1 SV=3	INVnr_XP_001867299.1_xaa-pro_dipeptidase_[Culex_quinquefasciatus]
CPIJ000611	sulfate transporter 1.2	52.4023	-1.48313	0.579278	-2.56031	0.0104579	0.0302279		sulfate transporter	S2611_HUMANSodium-independent sulfate anion transporter OS=Homo sapiens OX=9606 GN=SLC26A11 PE=2 SV=2	INVnr_XP_001842374.1_sulfate_transporter_1.2_[Culex_quinquefasciatus]
CPIJ019833	monocarboxylate transporter	25.7941	-1.48373	0.332438	-4.46319	8.07e-06	5.88e-05		monocarboxylate transporter	CABL1_HUMANCDK5 and ABL1 enzyme substrate 1 OS=Homo sapiens OX=9606 GN=CABLES1 PE=1 SV=2	INVnr_XP_001870044.1_monocarboxylate_transporter_[Culex_quinquefasciatus]
CPIJ006748	activating signal cointegrator 1 complex subunit 3	95.7925	-1.48759	0.21706	-6.85338	7.21e-12	1.61e-10		activating signal cointegrator 1 complex subunit 3	ASCC3_CHICKActivating signal cointegrator 1 complex subunit 3 OS=Gallus gallus OX=9031 GN=ascc3 PE=3 SV=2	INVnr_XP_001849123.1_activating_signal_cointegrator_1_complex_subunit_3_[Culex_quinquefasciatus]
CPIJ008746	zinc finger protein 545	5.3031	-1.48938	0.550211	-2.70693	0.00679087	0.0210634		zinc finger 545	ZFP3_MOUSEZinc finger 3 OS=Mus musculus OX=10090 GN=Zfp3 PE=2 SV=1	INVnr_XP_001850401.1_zinc_finger_protein_545_[Culex_quinquefasciatus]
CPIJ015121	APG2: autophagy related gene	96.2431	-1.49004	0.20715	-7.19303	6.34e-13	1.71e-11	cqu04136,cqu04140	autophagy-related 2 homolog A	ATG2A_MOUSEAutophagy-related 2 homolog A OS=Mus musculus OX=10090 GN=Atg2a PE=1 SV=2	INVnr_XP_001865123.1_autophagy-specific_gene_2_[Culex_quinquefasciatus]
CPIJ003198	neuropathy target esterase/swiss cheese(d.melanogaster)	60.8598	-1.4904	0.260372	-5.72414	1.04e-08	1.42e-07	cqu00564	neuropathy target esterase swiss cheese	SWS_DROMENeuropathy target esterase sws OS=Drosophila melanogaster OX=7227 GN=sws PE=1 SV=2	INVnr_XP_001844786.1_neuropathy_target_esterase/swiss_cheese_[Culex_quinquefasciatus]
CPIJ008490	ankyrin repeat domain-containing protein 44	11.263	-1.49282	0.451514	-3.30626	0.000945504	0.00390166		ankyrin repeat	ANK2_HUMANAnkyrin-2 OS=Homo sapiens OX=9606 GN=ANK2 PE=1 SV=4	INVnr_XP_001850136.1_ankyrin_repeat_domain-containing_protein_44_[Culex_quinquefasciatus]
CPIJ016186	conserved hypothetical protein	9.00518	-1.49387	0.480958	-3.10602	0.00189621	0.00711988		E3 ubiquitin- ligase arkadia-B	RN165_HUMANE3 ubiquitin- ligase RNF165 OS=Homo sapiens OX=9606 GN=RNF165 PE=1 SV=1	INVnr_XP_001866274.1_conserved_hypothetical_protein_[Culex_quinquefasciatus]
CPIJ003636	GTP binding protein	47.7735	-1.49738	0.280321	-5.34165	9.21e-08	1.01e-06		GTP binding	GTPB2_MOUSEGTP-binding 2 OS=Mus musculus OX=10090 GN=Gtpbp2 PE=1 SV=1	INVnr_XP_001845415.1_GTP_binding_protein_[Culex_quinquefasciatus]
CPIJ012852	conserved hypothetical protein	8.79254	-1.49785	0.481732	-3.10929	0.00187535	0.00704926	cqu03410	DNA-repair XRCC1	XRCC1_RATDNA repair XRCC1 OS=Rattus norvegicus OX=10116 GN=Xrcc1 PE=1 SV=2	INVnr_XP_001863088.1_conserved_hypothetical_protein_[Culex_quinquefasciatus]
CPIJ017579	conserved hypothetical protein	29.5856	-1.49785	0.321193	-4.6634	3.11e-06	2.48e-05		conserved hypothetical protein	ANKL2_RATAnkyrin repeat and LEM domain-containing 2 OS=Rattus norvegicus OX=10116 GN=Ankle2 PE=2 SV=2	INVnr_XP_001867769.1_conserved_hypothetical_protein_[Culex_quinquefasciatus]
CPIJ006731	numb-associated kinase, putative	36.3227	-1.49794	0.294402	-5.08807	3.62e-07	3.53e-06		numb-associated kinase	BMP2K_MOUSEBMP-2-inducible kinase OS=Mus musculus OX=10090 GN=Bmp2k PE=1 SV=1	INVnr_XP_001849106.1_numb-associated_kinase_[Culex_quinquefasciatus]
CPIJ004254	conserved hypothetical protein	7.87066	-1.49804	0.505641	-2.96266	0.00304994	0.010683		formin CG32138	Y2138_DROMEFormin CG32138 OS=Drosophila melanogaster OX=7227 GN=CG32138 PE=1 SV=3	INVnr_XP_001845834.1_conserved_hypothetical_protein_[Culex_quinquefasciatus]
CPIJ000895	conserved hypothetical protein	53.0086	-1.49916	0.276435	-5.42318	5.85e-08	6.73e-07	cqu00562,cqu01100,cqu04070,cqu04140	myotubularin-related 14	MTMRE_HUMANMyotubularin-related 14 OS=Homo sapiens OX=9606 GN=MTMR14 PE=1 SV=2	INVnr_XP_001842518.1_conserved_hypothetical_protein_[Culex_quinquefasciatus]
CPIJ001273	conserved hypothetical protein	12.6477	-1.50429	0.43391	-3.46682	0.000526655	0.00235242	cqu04136,cqu04140,cqu04150	serine threonine- kinase ULK2-like	ULK2_MOUSESerine threonine- kinase ULK2 OS=Mus musculus OX=10090 GN=Ulk2 PE=1 SV=1	INVnr_XP_001842942.1_conserved_hypothetical_protein_[Culex_quinquefasciatus]
CPIJ001760	jak kinase hopscotch	11.2537	-1.50444	0.448034	-3.35787	0.00078546	0.00335727		jak kinase hopscotch	JAK_DROMETyrosine- kinase hopscotch OS=Drosophila melanogaster OX=7227 GN=hop PE=1 SV=2	INVnr_XP_001843625.1_jak_kinase_hopscotch_[Culex_quinquefasciatus]
CPIJ007750	conserved hypothetical protein	9.60235	-1.50577	0.47089	-3.19772	0.00138518	0.00542067		conserved hypothetical protein	---NA---	INVnr_XP_001849253.1_conserved_hypothetical_protein_[Culex_quinquefasciatus]
CPIJ003677	nadph fad oxidoreductase	59.6829	-1.50581	0.275107	-5.47352	4.41e-08	5.24e-07		NADPH FAD oxidoreductase	NDOR1_DANRENADPH-dependent diflavin oxidoreductase 1 OS=Danio rerio OX=7955 GN=ndor1 PE=2 SV=1	INVnr_XP_001845457.1_NADPH_FAD_oxidoreductase_[Culex_quinquefasciatus]
CPIJ019485	cholinesterase	22.2603	-1.50665	0.35271	-4.27164	1.94e-05	0.000128822		esterase B1-like	EST1_CULPIEsterase B1 OS=Culex pipiens OX=7175 GN=B1 PE=3 SV=1	INVnr_XP_001869625.1_cholinesterase_[Culex_quinquefasciatus]
CPIJ008547	myd88, putative	23.5909	-1.50789	0.353346	-4.26747	1.98e-05	0.000130886	cqu04624	myeloid differentiation primary response 88	MYD88_CHICKMyeloid differentiation primary response 88 OS=Gallus gallus OX=9031 GN=MYD88 PE=1 SV=1	INVnr_XP_001850286.1_myd88_[Culex_quinquefasciatus]
CPIJ003693	glucosyl/glucuronosyl transferases	41.2417	-1.51034	0.282178	-5.35245	8.68e-08	9.67e-07		glucosyl glucuronosyl transferase	CGT_HUMAN2-hydroxyacylsphingosine 1-beta-galactosyltransferase OS=Homo sapiens OX=9606 GN=UGT8 PE=2 SV=2	INVnr_XP_001845520.1_glucosyl/glucuronosyl_transferase_[Culex_quinquefasciatus]
CPIJ004484	conserved hypothetical protein	4.89931	-1.51136	0.569779	-2.65254	0.00798895	0.0241624		actin-related 8	ARP8_AEDAEActin-related 8 OS=Aedes aegypti OX=7159 GN=Arp8 PE=3 SV=1	INVnr_XP_001846070.1_conserved_hypothetical_protein_[Culex_quinquefasciatus]
CPIJ014162	BTB/POZ domain containing protein	9.88133	-1.51167	0.468451	-3.22695	0.00125117	0.00498769		BTB POZ domain containing	BTBD6_XENLABTB POZ domain-containing 6 OS=Xenopus laevis OX=8355 GN=btbd6 PE=1 SV=1	INVnr_XP_001864191.1_BTB/POZ_domain_containing_protein_[Culex_quinquefasciatus]
CPIJ000936	hypothetical protein	17.6125	-1.51836	0.383718	-3.95697	7.59e-05	0.000432241		hypothetical protein CpipJ_CPIJ000936	---NA---	INVnr_XP_001842606.1_hypothetical_protein_CpipJ_CPIJ000936_[Culex_quinquefasciatus]
CPIJ010307	conserved hypothetical protein	147.093	-1.51886	0.236105	-6.43299	1.25e-10	2.31e-09		conserved hypothetical protein	---NA---	INVnr_XP_001858923.1_conserved_hypothetical_protein_[Culex_quinquefasciatus]
CPIJ015050	VPRBP protein	196.242	-1.51939	0.163442	-9.29622	1.46e-20	9.67e-19		mahjong isoform X4	DCAF1_DROME mahjong OS=Drosophila melanogaster OX=7227 GN=mahj PE=1 SV=2	INVnr_XP_001865214.1_VPRBP_protein_[Culex_quinquefasciatus]
CPIJ002976	zinc finger protein 307	21.7393	-1.52049	0.360138	-4.22196	2.42e-05	0.00015709		zinc finger 307	ZN835_HUMANZinc finger 835 OS=Homo sapiens OX=9606 GN=ZNF835 PE=2 SV=2	INVnr_XP_001844868.1_zinc_finger_protein_307_[Culex_quinquefasciatus]
CPIJ000613	sulfate transporter, putative	150.265	-1.52202	0.217412	-7.00064	2.55e-12	6.21e-11		sodium-independent sulfate anion transporter isoform X2	S2611_HUMANSodium-independent sulfate anion transporter OS=Homo sapiens OX=9606 GN=SLC26A11 PE=2 SV=2	INVnr_XP_001842376.1_sulfate_transporter_[Culex_quinquefasciatus]
CPIJ013377	sorbitol dehydrogenase	313.704	-1.52228	0.172913	-8.80372	1.32e-18	7.12e-17	cqu00040,cqu00051,cqu01100	sorbitol dehydrogenase-like	DHSO_RATSorbitol dehydrogenase OS=Rattus norvegicus OX=10116 GN=Sord PE=1 SV=4	INVnr_XP_001863559.1_sorbitol_dehydrogenase_[Culex_quinquefasciatus]
CPIJ016573	aladin	17.8387	-1.52434	0.384954	-3.9598	7.5e-05	0.000427499	cqu03013	aladin	AAAS_MOUSEAladin OS=Mus musculus OX=10090 GN=Aaas PE=1 SV=1	INVnr_XP_001867109.1_aladin_[Culex_quinquefasciatus]
CPIJ008005	annexin x	91.1281	-1.52544	0.227418	-6.70762	1.98e-11	4.2e-10		annexin x	ANX10_DROMEAnnexin B10 OS=Drosophila melanogaster OX=7227 GN= 10 PE=2 SV=3	INVnr_XP_001850034.1_annexin_x_[Culex_quinquefasciatus]
CPIJ018042	conserved hypothetical protein	19.1423	-1.52655	0.373749	-4.08444	4.42e-05	0.00027016		---NA---	TTLL4_MOUSETubulin polyglutamylase TTLL4 OS=Mus musculus OX=10090 GN=Ttll4 PE=2 SV=3	INVnr_XP_001868483.1_conserved_hypothetical_protein_[Culex_quinquefasciatus]
CPIJ008638	kanadaptin	19.2107	-1.53019	0.374246	-4.08873	4.34e-05	0.000265448		kanadaptin	NADAP_HUMANKanadaptin OS=Homo sapiens OX=9606 GN=SLC4A1AP PE=1 SV=1	INVnr_XP_001850206.1_kanadaptin_[Culex_quinquefasciatus]
CPIJ010383	negative cofactor 2 transcriptional co-repressor	7.79401	-1.53076	0.501372	-3.05314	0.0022646	0.0082996		negative cofactor 2 transcriptional co-repressor	---NA---	INVnr_XP_001870879.1_negative_cofactor_2_transcriptional_co-repressor_[Culex_quinquefasciatus]
CPIJ017178	myoinositol oxygenase	910.749	-1.53095	0.154012	-9.94048	2.77e-23	2.36e-21	cqu00053,cqu00562	myoinositol oxygenase	MIOX_DANREInositol oxygenase OS=Danio rerio OX=7955 GN=miox PE=2 SV=1	INVnr_XP_001867463.1_myoinositol_oxygenase_[Culex_quinquefasciatus]
CPIJ014115	conserved hypothetical protein	4.82086	-1.53111	0.569318	-2.68938	0.00715855	0.0220678		conserved hypothetical protein	---NA---	INVnr_XP_001863985.1_conserved_hypothetical_protein_[Culex_quinquefasciatus]
CPIJ006835	conserved hypothetical protein	41.3651	-1.5336	0.290399	-5.28101	1.28e-07	1.38e-06		conserved hypothetical protein	---NA---	INVnr_XP_001848774.1_conserved_hypothetical_protein_[Culex_quinquefasciatus]
CPIJ004116	LST2: lateral signalling target protein 2	31.9141	-1.53434	0.310725	-4.93795	7.89e-07	7.22e-06		lateral signaling target 2 homolog isoform X1	LST2_CULQULateral signaling target 2 homolog OS=Culex quinquefasciatus OX=7176 GN=CPIJ004116 PE=3 SV=1	INVnr_XP_001845784.1_zinc_finger_FYVE_domain-containing_protein_28_[Culex_quinquefasciatus]
CPIJ006761	glucose-6-phosphate 1-dehydrogenase	243.013	-1.53497	0.159034	-9.65187	4.83e-22	3.74e-20	cqu00030,cqu00480,cqu01100,cqu01200	glucose-6-phosphate 1-dehydrogenase	G6PD_DROMEGlucose-6-phosphate 1-dehydrogenase OS=Drosophila melanogaster OX=7227 GN=Zw PE=1 SV=2	INVnr_XP_001848152.1_glucose-6-phosphate_1-dehydrogenase_[Culex_quinquefasciatus]
CPIJ001300	zinc finger protein 780B	10.8177	-1.53523	0.457045	-3.35902	0.000782181	0.00334528		zinc finger 780B	ZNF81_HUMANZinc finger 81 OS=Homo sapiens OX=9606 GN=ZNF81 PE=1 SV=3	INVnr_XP_001842969.1_zinc_finger_protein_780B_[Culex_quinquefasciatus]
CPIJ003313	conserved hypothetical protein	25.4012	-1.5362	0.350859	-4.37841	1.2e-05	8.42e-05		MAP kinase-interacting serine threonine- kinase 1	MKNK1_MOUSEMAP kinase-interacting serine threonine- kinase 1 OS=Mus musculus OX=10090 GN=Mknk1 PE=1 SV=2	INVnr_XP_001845039.1_conserved_hypothetical_protein_[Culex_quinquefasciatus]
CPIJ002851	BEL12_AG transposon polyprotein, putative	18.5363	-1.5387	0.375804	-4.09442	4.23e-05	0.000259461		BEL12_AG transposon poly	---NA---	INVnr_XP_001844382.1_BEL12_AG_transposon_polyprotein_[Culex_quinquefasciatus]
CPIJ003639	S-phase kinase-associated protein 2	6.16022	-1.53882	0.53241	-2.8903	0.00384876	0.0130027	cqu04068,cqu04120,cqu04150	S-phase kinase-associated 2	SKP2_HUMANS-phase kinase-associated 2 OS=Homo sapiens OX=9606 GN=SKP2 PE=1 SV=2	INVnr_XP_001845418.1_S-phase_kinase-associated_protein_2_[Culex_quinquefasciatus]
CPIJ014088	conserved hypothetical protein	61.8743	-1.54087	0.255236	-6.03704	1.57e-09	2.49e-08	cqu04624	conserved hypothetical protein	---NA---	INVnr_XP_001864071.1_conserved_hypothetical_protein_[Culex_quinquefasciatus]
CPIJ007699	conserved hypothetical protein	19.8749	-1.54096	0.374224	-4.11775	3.83e-05	0.000237446		conserved hypothetical protein	---NA---	INVnr_XP_001849593.1_conserved_hypothetical_protein_[Culex_quinquefasciatus]
CPIJ000638	conserved hypothetical protein	18.2889	-1.54304	0.382686	-4.03214	5.53e-05	0.000326346		zinc finger 82 homolog	ZN521_HUMANZinc finger 521 OS=Homo sapiens OX=9606 GN=ZNF521 PE=1 SV=1	INVnr_XP_001842401.1_conserved_hypothetical_protein_[Culex_quinquefasciatus]
CPIJ000779	equilibrative nucleoside transporter	13.155	-1.54828	0.43402	-3.56729	0.000360686	0.00169491		equilibrative nucleoside transporter	S29A3_HUMANEquilibrative nucleoside transporter 3 OS=Homo sapiens OX=9606 GN=SLC29A3 PE=1 SV=3	INVnr_XP_001842585.1_equilibrative_nucleoside_transporter_[Culex_quinquefasciatus]
CPIJ015049	hypothetical protein	16.3707	-1.54989	0.407998	-3.79877	0.000145419	0.000761228		---NA---	---NA---	NA
CPIJ001627	conserved hypothetical protein	4.11262	-1.55065	0.586959	-2.64184	0.00824571	0.0247865		conserved hypothetical protein	---NA---	INVnr_XP_001843167.1_conserved_hypothetical_protein_[Culex_quinquefasciatus]
CPIJ006065	conserved hypothetical protein	30.3694	-1.55282	0.315072	-4.92845	8.29e-07	7.56e-06		probable serine threonine- kinase kinX isoform X1	---NA---	INVnr_XP_001847479.1_conserved_hypothetical_protein_[Culex_quinquefasciatus]
CPIJ012302	conserved hypothetical protein	22.9769	-1.55665	0.348336	-4.46882	7.87e-06	5.74e-05		MAU2 chromatid cohesion factor homolog	SCC4_CULQUMAU2 chromatid cohesion factor homolog OS=Culex quinquefasciatus OX=7176 GN=CPIJ012302 PE=3 SV=1	INVnr_XP_001862545.1_conserved_hypothetical_protein_[Culex_quinquefasciatus]
CPIJ018895	myosin iii	35.3656	-1.55782	0.298832	-5.21302	1.86e-07	1.92e-06		myosin iii	---NA---	INVnr_XP_001869282.1_myosin_iii_[Culex_quinquefasciatus]
CPIJ000469	protein aq_284	34.418	-1.55862	0.304352	-5.12112	3.04e-07	3.03e-06		threonylcarbamoyladenosine tRNA methylthiotransferase	CDKAL_DROMEThreonylcarbamoyladenosine tRNA methylthiotransferase OS=Drosophila melanogaster OX=7227 GN=CG6550 PE=2 SV=1	INVnr_XP_001842139.1_aq_284_[Culex_quinquefasciatus]
CPIJ007401	Autophagy-specific protein, putative	9.98373	-1.55938	0.465488	-3.34998	0.000808169	0.0034335		WD repeat domain phosphoinositide-interacting 2 isoform X1	WIPI2_CHICKWD repeat domain phosphoinositide-interacting 2 OS=Gallus gallus OX=9031 GN=WIPI2 PE=2 SV=1	INVnr_XP_001849026.1_Autophagy-specific_protein_[Culex_quinquefasciatus]
CPIJ017087	conserved hypothetical protein	18.8129	-1.55963	0.379857	-4.10583	4.03e-05	0.000248706		TBC domain-containing kinase	TBCK_CHICKTBC domain-containing kinase OS=Gallus gallus OX=9031 GN=TBCK PE=2 SV=2	INVnr_XP_001867445.1_conserved_hypothetical_protein_[Culex_quinquefasciatus]
CPIJ002000	conserved hypothetical protein	72.6019	-1.55975	0.246882	-6.31779	2.65e-10	4.66e-09		pygopus isoform X1	BCL9_DROME BCL9 homolog OS=Drosophila melanogaster OX=7227 GN=lgs PE=1 SV=1	INVnr_XP_001843539.1_conserved_hypothetical_protein_[Culex_quinquefasciatus]
CPIJ012893	conserved hypothetical protein	14.3806	-1.56096	0.413517	-3.77484	0.000160113	0.000825043	cqu03440,cqu03460	conserved hypothetical protein	BRCA2_FELCABreast cancer type 2 susceptibility homolog OS=Felis catus OX=9685 GN=BRCA2 PE=2 SV=2	INVnr_XP_001863104.1_conserved_hypothetical_protein_[Culex_quinquefasciatus]
CPIJ006883	DNA segment Chr 2 Wayne State University 81 expressed	15.2941	-1.56121	0.407034	-3.83558	0.000125268	0.000672553		methyltransferase C9orf114	CI114_HUMAN methyltransferase C9orf114 OS=Homo sapiens OX=9606 GN=SPOUT1 PE=1 SV=3	INVnr_XP_001848900.1_conserved_hypothetical_protein_[Culex_quinquefasciatus]
CPIJ015879	conserved hypothetical protein	31.7812	-1.56225	0.334425	-4.67146	2.99e-06	2.4e-05		SWI SNF-related matrix-associated actin-dependent regulator of chromatin subfamily A 1	SMAL1_DROMESWI SNF-related matrix-associated actin-dependent regulator of chromatin subfamily A 1 OS=Drosophila melanogaster OX=7227 GN=Marcal1 PE=1 SV=2	INVnr_XP_001866436.1_conserved_hypothetical_protein_[Culex_quinquefasciatus]
CPIJ008436	conserved hypothetical protein	15.6919	-1.56382	0.420699	-3.7172	0.000201441	0.00101341		F-box LRR-repeat 4-like	YKK7_CAEELUncharacterized F-box LRR-repeat OS=Caenorhabditis elegans OX=6239 GN= PE=4 SV=3	INVnr_XP_001849980.1_conserved_hypothetical_protein_[Culex_quinquefasciatus]
CPIJ006406	unkempt protein	15.9431	-1.5642	0.399643	-3.91399	9.08e-05	0.000505511		E3 ubiquitin- ligase UNKL isoform X5	---NA---	INVnr_XP_001848279.1_unkempt_protein_[Culex_quinquefasciatus]
CPIJ006098	conserved hypothetical protein	23.1482	-1.56772	0.34667	-4.52222	6.12e-06	4.58e-05		SH3 domain-containing	---NA---	INVnr_XP_001847981.1_conserved_hypothetical_protein_[Culex_quinquefasciatus]
CPIJ019637	conserved hypothetical protein	45.2274	-1.56958	0.300726	-5.2193	1.8e-07	1.87e-06		vanin 2	BTD_TAKRUBiotinidase OS=Takifugu rubripes OX=31033 GN=btd PE=3 SV=1	INVnr_XP_001869975.1_conserved_hypothetical_protein_[Culex_quinquefasciatus]
CPIJ010231	CYP12F9: cytochrome P450 12F9	68.5973	-1.56984	0.241202	-6.50843	7.59e-11	1.47e-09		cytochrome P450 mitochondrial	C12A5_DROMEProbable cytochrome P450 mitochondrial OS=Drosophila melanogaster OX=7227 GN=Cyp12a5 PE=2 SV=1	INVnr_XP_001855599.1_cytochrome_P450_[Culex_quinquefasciatus]
CPIJ001478	pre-mRNA-splicing factor cwc22	23.9966	-1.57097	0.345475	-4.54729	5.43e-06	4.13e-05		pre-mRNA-splicing factor cwc22	CWC22_MUSDOPre-mRNA-splicing factor CWC22 homolog OS=Musca domestica OX=7370 GN=ncm PE=3 SV=1	INVnr_XP_001843779.1_pre-mRNA-splicing_factor_cwc22_[Culex_quinquefasciatus]
CPIJ012831	fibrinogen and fibronectin	130.879	-1.57219	0.195864	-8.02695	9.99e-16	3.85e-14		fibrinogen and fibronectin	FCN1_MOUSEFicolin-1 OS=Mus musculus OX=10090 GN=Fcn1 PE=1 SV=1	INVnr_XP_001863539.1_fibrinogen_and_fibronectin_[Culex_quinquefasciatus]
CPIJ009877	phenoloxidase subunit 1 precursor	5.68324	-1.575	0.544697	-2.89151	0.00383395	0.0129651		phenoloxidase subunit 1	PPO1_HOLDIPhenoloxidase 1 OS=Holotrichia diomphalia OX=33394 GN=PPO1 PE=1 SV=1	INVnr_XP_001870838.1_phenoloxidase_subunit_1_[Culex_quinquefasciatus]
CPIJ013562	alanine-glyoxylate aminotransferase	9.41299	-1.58311	0.474527	-3.33618	0.000849391	0.0035635	cqu00250,cqu00260,cqu00270,cqu00280,cqu01100	alanine-glyoxylate aminotransferase	AGT2_HUMANAlanine--glyoxylate aminotransferase mitochondrial OS=Homo sapiens OX=9606 GN=AGXT2 PE=1 SV=1	INVnr_XP_001864253.1_alanine-glyoxylate_aminotransferase_[Culex_quinquefasciatus]
CPIJ011605	conserved hypothetical protein	11.4152	-1.58336	0.447431	-3.53878	0.000401978	0.00185674		conserved hypothetical protein	ADF1_DROMETranscription factor Adf-1 OS=Drosophila melanogaster OX=7227 GN=Adf1 PE=2 SV=2	INVnr_XP_001861807.1_conserved_hypothetical_protein_[Culex_quinquefasciatus]
CPIJ016763	short-chain dehydrogenase	13.4799	-1.58908	0.441084	-3.60267	0.000314963	0.00150413		short-chain dehydrogenase	HSD1B_ARATH11-beta-hydroxysteroid dehydrogenase 1B OS=Arabidopsis thaliana OX=3702 GN=HSD1 PE=1 SV=1	INVnr_XP_001867155.1_short-chain_dehydrogenase_[Culex_quinquefasciatus]
CPIJ002370	hypothetical protein	10.4393	-1.58983	0.463111	-3.43293	0.000597089	0.00262377		hypothetical protein CpipJ_CPIJ002370	---NA---	INVnr_XP_001844114.1_hypothetical_protein_CpipJ_CPIJ002370_[Culex_quinquefasciatus]
CPIJ006841	SAPS287	62.3563	-1.59602	0.545294	-2.9269	0.00342355	0.0117669		leucine-rich repeats and immunoglobulin-like domains 2	LRIG3_HUMANLeucine-rich repeats and immunoglobulin-like domains 3 OS=Homo sapiens OX=9606 GN=LRIG3 PE=2 SV=1	INVnr_XP_001848389.1_SAPS287_[Culex_quinquefasciatus]
CPIJ008500	conserved hypothetical protein	881.536	-1.5981	0.120979	-13.2098	7.71e-40	1.87e-37		conserved hypothetical protein	---NA---	INVnr_XP_001850146.1_conserved_hypothetical_protein_[Culex_quinquefasciatus]
CPIJ001364	conserved hypothetical protein	20.5682	-1.5987	0.374298	-4.27119	1.94e-05	0.000128963		RNA polymerase II-associated 1-like	RPAP1_HUMANRNA polymerase II-associated 1 OS=Homo sapiens OX=9606 GN=RPAP1 PE=1 SV=3	INVnr_XP_001843142.1_conserved_hypothetical_protein_[Culex_quinquefasciatus]
CPIJ013079	conserved hypothetical protein	167.577	-1.59925	0.425566	-3.75794	0.000171319	0.000877016		conserved hypothetical protein	---NA---	INVnr_XP_001863381.1_conserved_hypothetical_protein_[Culex_quinquefasciatus]
CPIJ013313	apolipoprotein D, putative	116.469	-1.60186	0.222201	-7.20905	5.63e-13	1.53e-11		apolipo D	APOD_MOUSEApolipo D OS=Mus musculus OX=10090 GN=Apod PE=1 SV=1	INVnr_XP_001866793.1_apolipoprotein_D_[Culex_quinquefasciatus]
CPIJ005082	pyrroline-5-carboxylate reductase	65.2436	-1.60299	0.240883	-6.65465	2.84e-11	5.87e-10	cqu00330,cqu01100,cqu01230	pyrroline-5-carboxylate reductase	P5CR1_MOUSEPyrroline-5-carboxylate reductase mitochondrial OS=Mus musculus OX=10090 GN=Pycr1 PE=1 SV=1	INVnr_XP_001846563.1_pyrroline-5-carboxylate_reductase_[Culex_quinquefasciatus]
CPIJ010018	DNA topoisomerase 2	27.3083	-1.60475	0.334952	-4.791	1.66e-06	1.41e-05		DNA topoisomerase 2	TOP2_DROMEDNA topoisomerase 2 OS=Drosophila melanogaster OX=7227 GN=Top2 PE=1 SV=1	INVnr_XP_001851377.1_DNA_topoisomerase_2_[Culex_quinquefasciatus]
CPIJ015211	imaginal discs arrested, putative	19.0945	-1.6064	0.375478	-4.27828	1.88e-05	0.000125397	cqu04120	imaginal discs arrested	APC5_MOUSEAnaphase-promoting complex subunit 5 OS=Mus musculus OX=10090 GN=Anapc5 PE=1 SV=1	INVnr_XP_001865616.1_imaginal_discs_arrested_[Culex_quinquefasciatus]
CPIJ015206	zinc finger protein 59	5.8811	-1.60672	0.54408	-2.9531	0.003146	0.0109542		zinc finger 59	ZN616_HUMANZinc finger 616 OS=Homo sapiens OX=9606 GN=ZNF616 PE=2 SV=2	INVnr_XP_001865611.1_zinc_finger_protein_59_[Culex_quinquefasciatus]
CPIJ004169	conserved hypothetical protein	60.0454	-1.61537	0.243014	-6.64724	2.99e-11	6.11e-10		conserved hypothetical protein	---NA---	INVnr_XP_001845893.1_conserved_hypothetical_protein_[Culex_quinquefasciatus]
CPIJ006165	general transcription factor 3C polypeptide 3	8.81156	-1.61754	0.483624	-3.34463	0.000823925	0.00348572		general transcription factor 3C polypeptide 3	TF3C3_HUMANGeneral transcription factor 3C polypeptide 3 OS=Homo sapiens OX=9606 GN=GTF3C3 PE=1 SV=1	INVnr_XP_001847609.1_general_transcription_factor_3C_polypeptide_3_[Culex_quinquefasciatus]
CPIJ014791	eukaryotic translation initiation factor 2C 2	676.051	-1.61764	0.145035	-11.1534	6.89e-29	8.51e-27		eukaryotic translation initiation factor 2C 2	AGO2_DROME argonaute-2 OS=Drosophila melanogaster OX=7227 GN=AGO2 PE=1 SV=3	INVnr_XP_001865113.1_eukaryotic_translation_initiation_factor_2C_2_[Culex_quinquefasciatus]
CPIJ002633	conserved hypothetical protein	26.7531	-1.62008	0.340058	-4.76412	1.9e-06	1.59e-05		integrator complex subunit 1-like	INT1_DROMEIntegrator complex subunit 1 OS=Drosophila melanogaster OX=7227 GN= 1 PE=1 SV=2	INVnr_XP_001844702.1_conserved_hypothetical_protein_[Culex_quinquefasciatus]
CPIJ010934	conserved hypothetical protein	30.3187	-1.6202	0.340005	-4.76524	1.89e-06	1.58e-05		conserved hypothetical protein	---NA---	INVnr_XP_001857710.1_conserved_hypothetical_protein_[Culex_quinquefasciatus]
CPIJ004547	lariat debranching enzyme	29.4159	-1.6209	0.321147	-5.04722	4.48e-07	4.34e-06		lariat debranching enzyme	DBR1_DROPSLariat debranching enzyme OS=Drosophila pseudoobscura pseudoobscura OX=46245 GN=DBR1 PE=3 SV=2	INVnr_XP_001846311.1_lariat_debranching_enzyme_[Culex_quinquefasciatus]
CPIJ006066	conserved hypothetical protein	17.5152	-1.62407	0.394623	-4.11551	3.86e-05	0.000239132		probable serine threonine- kinase kinX isoform X1	---NA---	INVnr_XP_001847480.1_conserved_hypothetical_protein_[Culex_quinquefasciatus]
CPIJ008296	zinc finger protein 668	6.68708	-1.62531	0.532703	-3.05106	0.00228031	0.00833551		zinc finger 668	ZG7_XENLAGastrula zinc finger (Fragment) OS=Xenopus laevis OX=8355 PE=3 SV=1	INVnr_XP_001849412.1_zinc_finger_protein_668_[Culex_quinquefasciatus]
CPIJ002630	Phosphorylated adaptor for RNA export, putative	31.1898	-1.62668	0.313197	-5.1938	2.06e-07	2.12e-06	cqu03013	Phosphorylated adaptor for RNA export	PHAX_CHICKPhosphorylated adapter RNA export OS=Gallus gallus OX=9031 GN=PHAX PE=2 SV=1	INVnr_XP_001844699.1_Phosphorylated_adaptor_for_RNA_export_[Culex_quinquefasciatus]
CPIJ014281	carbonic anhydrase precursor	205.713	-1.62748	0.53578	-3.0376	0.00238473	0.00864985	cqu00910	carbonic anhydrase	CAH4_HUMANCarbonic anhydrase 4 OS=Homo sapiens OX=9606 GN=CA4 PE=1 SV=2	INVnr_XP_001864721.1_carbonic_anhydrase_[Culex_quinquefasciatus]
CPIJ008670	wd-repeat protein	21.9532	-1.62845	0.3667	-4.44083	8.96e-06	6.47e-05	cqu03022	wd-repeat protein	TAF5L_MOUSETAF5-like RNA polymerase II p300 CBP-associated factor-associated factor 65 kDa subunit 5L OS=Mus musculus OX=10090 GN=Taf5l PE=2 SV=1	INVnr_XP_001850238.1_wd-repeat_protein_[Culex_quinquefasciatus]
CPIJ016945	conserved hypothetical protein	10.4987	-1.63138	0.461481	-3.5351	0.000407616	0.00188032		histone H4 transcription factor	---NA---	INVnr_XP_001867231.1_conserved_hypothetical_protein_[Culex_quinquefasciatus]
CPIJ013862	phosphoglucomutase	52.8993	-1.634	0.257796	-6.33836	2.32e-10	4.14e-09	cqu00520,cqu01100	phosphoacetylglucosamine mutase-like	AGM1_PIGPhosphoacetylglucosamine mutase OS=Sus scrofa OX=9823 GN=PGM3 PE=1 SV=2	INVnr_XP_001864454.1_phosphoglucomutase_[Culex_quinquefasciatus]
CPIJ004565	wd-repeat protein	57.6798	-1.63422	0.249621	-6.54679	5.88e-11	1.16e-09		DDB1- and CUL4-associated factor 8 isoform X2	DCAF8_MOUSEDDB1- and CUL4-associated factor 8 OS=Mus musculus OX=10090 GN=Dcaf8 PE=1 SV=1	INVnr_XP_001846329.1_wd-repeat_protein_[Culex_quinquefasciatus]
CPIJ007259	conserved hypothetical protein	21.0673	-1.6374	0.369848	-4.42724	9.54e-06	6.86e-05	cqu03450	DNA-dependent kinase catalytic subunit-like	PRKDC_CANLFDNA-dependent kinase catalytic subunit OS=Canis lupus familiaris OX=9615 GN=PRKDC PE=2 SV=1	INVnr_XP_001848795.1_conserved_hypothetical_protein_[Culex_quinquefasciatus]
CPIJ008245	conserved hypothetical protein	62.7626	-1.64366	0.242739	-6.77131	1.28e-11	2.75e-10		regulator of microtubule dynamics 1	RMD1_HUMANRegulator of microtubule dynamics 1 OS=Homo sapiens OX=9606 GN=RMDN1 PE=1 SV=1	INVnr_XP_001849621.1_conserved_hypothetical_protein_[Culex_quinquefasciatus]
CPIJ012872	conserved hypothetical protein	8.82193	-1.64483	0.486955	-3.37779	0.000730713	0.0031481		conserved hypothetical protein	---NA---	INVnr_XP_001862921.1_conserved_hypothetical_protein_[Culex_quinquefasciatus]
CPIJ002098	chymotrypsin BI precursor	19.9756	-1.65191	0.376557	-4.38687	1.15e-05	8.13e-05		chymotrypsin BI	CTRB1_LITVAChymotrypsin BI OS=Litopenaeus vannamei OX=6689 PE=1 SV=1	INVnr_XP_001843365.1_chymotrypsin_BI_[Culex_quinquefasciatus]
CPIJ011036	helicase	10.7993	-1.65306	0.470064	-3.51666	0.000437005	0.00200408		chromatin-remodeling complex ATPase chain Iswi-like	ISWI_DROMEChromatin-remodeling complex ATPase chain Iswi OS=Drosophila melanogaster OX=7227 GN=Iswi PE=1 SV=1	INVnr_XP_001861302.1_helicase_[Culex_quinquefasciatus]
CPIJ001120	DLP: Daxx-like protein	76.5961	-1.6542	0.254675	-6.49534	8.28e-11	1.59e-09		death domain-associated 6	DAXX_RATDeath domain-associated 6 OS=Rattus norvegicus OX=10116 GN=Daxx PE=1 SV=1	INVnr_XP_001842789.1_conserved_hypothetical_protein_[Culex_quinquefasciatus]
CPIJ012188	epsilon-trimethyllysine 2-oxoglutarate dioxygenase	5.96695	-1.65522	0.545762	-3.03287	0.00242242	0.00875951		epsilon-trimethyllysine 2-oxoglutarate dioxygenase	---NA---	INVnr_XP_001862386.1_epsilon-trimethyllysine_2-oxoglutarate_dioxygenase_[Culex_quinquefasciatus]
CPIJ019184	conserved hypothetical protein	135.42	-1.65567	0.209257	-7.91215	2.53e-15	9.23e-14		conserved hypothetical protein	AKT2_ORYSJPotassium channel AKT2 OS=Oryza sativa japonica OX=39947 GN=Os05g0428700 PE=2 SV=1	INVnr_XP_001869451.1_conserved_hypothetical_protein_[Culex_quinquefasciatus]
CPIJ002777	conserved hypothetical protein	366.513	-1.65612	0.139932	-11.8352	2.57e-32	4.21e-30		transmembrane 192-like isoform X1	TM192_MOUSETransmembrane 192 OS=Mus musculus OX=10090 GN=Tmem192 PE=1 SV=1	INVnr_XP_001844360.1_conserved_hypothetical_protein_[Culex_quinquefasciatus]
CPIJ010845	conserved hypothetical protein	4.65139	-1.65677	0.58217	-2.84584	0.00442939	0.0145934		UPF0565 C2orf69 homolog	CB069_MOUSEUPF0565 C2orf69 homolog OS=Mus musculus OX=10090 PE=2 SV=3	INVnr_XP_001860326.1_conserved_hypothetical_protein_[Culex_quinquefasciatus]
CPIJ002648	protein tyrosine phosphatase, non-receptor type nt6	77.1071	-1.66034	0.238198	-6.97045	3.16e-12	7.52e-11		tyrosine- phosphatase non-receptor type 21 isoform X1	PTN14_HUMANTyrosine- phosphatase non-receptor type 14 OS=Homo sapiens OX=9606 GN=PTPN14 PE=1 SV=2	INVnr_XP_001844717.1_tyrosine_phosphatase,_non-receptor_type_nt6_[Culex_quinquefasciatus]
CPIJ018768	conserved hypothetical protein	33.3055	-1.66496	0.310636	-5.35984	8.33e-08	9.31e-07		zinc finger 180-like	MYNN_MOUSEMyoneurin OS=Mus musculus OX=10090 GN=Mynn PE=2 SV=2	INVnr_XP_001869071.1_conserved_hypothetical_protein_[Culex_quinquefasciatus]
CPIJ017276	suppressor of ty3	8.31193	-1.66689	0.499386	-3.33789	0.000844178	0.00354508		suppressor of ty3	SUPT3_HUMANTranscription initiation SPT3 homolog OS=Homo sapiens OX=9606 GN=SUPT3H PE=1 SV=3	INVnr_XP_001867567.1_suppressor_of_ty3_[Culex_quinquefasciatus]
CPIJ010972	zinc finger protein	27.0959	-1.66941	0.353797	-4.71856	2.38e-06	1.96e-05		zinc finger	ZN253_HUMANZinc finger 253 OS=Homo sapiens OX=9606 GN=ZNF253 PE=2 SV=2	INVnr_XP_001861786.1_zinc_finger_protein_[Culex_quinquefasciatus]
CPIJ013399	diphthamide biosynthesis protein 2	50.8599	-1.67015	0.262436	-6.36403	1.97e-10	3.54e-09		diphthamide biosynthesis 2	DPH2_DANRE2-(3-amino-3-carboxypropyl)histidine synthase subunit 2 OS=Danio rerio OX=7955 GN=dph2 PE=2 SV=1	INVnr_XP_001863593.1_diphthamide_biosynthesis_protein_2_[Culex_quinquefasciatus]
CPIJ018680	conserved hypothetical protein	59.3289	-1.67228	0.250673	-6.67119	2.54e-11	5.26e-10		conserved hypothetical protein	---NA---	INVnr_XP_001869144.1_conserved_hypothetical_protein_[Culex_quinquefasciatus]
CPIJ000639	conserved hypothetical protein	9.03991	-1.675	0.482667	-3.47029	0.000519893	0.00232516		zinc finger 366	ZBT40_HUMANZinc finger and BTB domain-containing 40 OS=Homo sapiens OX=9606 GN=ZBTB40 PE=1 SV=4	INVnr_XP_001842402.1_conserved_hypothetical_protein_[Culex_quinquefasciatus]
CPIJ015685	3-oxoacyl-[acyl-carrier-protein] reductase	35.1421	-1.68252	0.302159	-5.56834	2.57e-08	3.23e-07		3-oxoacyl-[acyl-carrier- ] reductase	DHB14_HUMAN17-beta-hydroxysteroid dehydrogenase 14 OS=Homo sapiens OX=9606 GN=HSD17B14 PE=1 SV=1	INVnr_XP_001866146.1_3-oxoacyl-[acyl-carrier-protein]_reductase_[Culex_quinquefasciatus]
CPIJ009451	conserved hypothetical protein	10.3791	-1.68629	0.481964	-3.49879	0.000467366	0.0021267		conserved hypothetical protein	---NA---	INVnr_XP_001851191.1_conserved_hypothetical_protein_[Culex_quinquefasciatus]
CPIJ004542	conserved hypothetical protein	6.16764	-1.69027	0.545112	-3.10079	0.00193008	0.00722038		mediator of RNA polymerase II transcription subunit 26 isoform X1	---NA---	INVnr_XP_001846306.1_conserved_hypothetical_protein_[Culex_quinquefasciatus]
CPIJ012788	zinc finger protein	6.74744	-1.69048	0.527226	-3.20636	0.00134428	0.00530482		transcription factor grauzone-like	GRAU_DROMETranscription factor grauzone OS=Drosophila melanogaster OX=7227 GN=grau PE=1 SV=1	INVnr_XP_001863404.1_zinc_finger_protein_[Culex_quinquefasciatus]
CPIJ014284	conserved hypothetical protein	4.48266	-1.69416	0.580261	-2.91966	0.00350411	0.0120053		conserved hypothetical protein	---NA---	INVnr_XP_001864724.1_conserved_hypothetical_protein_[Culex_quinquefasciatus]
CPIJ000595	conserved hypothetical protein	24.0738	-1.6988	0.349475	-4.86101	1.17e-06	1.03e-05		zinc finger 853	ZN236_HUMANZinc finger 236 OS=Homo sapiens OX=9606 GN=ZNF236 PE=2 SV=2	INVnr_XP_001842358.1_conserved_hypothetical_protein_[Culex_quinquefasciatus]
CPIJ014283	heat shock protein 70 B2	83.0577	-1.70521	0.220968	-7.71704	1.19e-14	4.01e-13	cqu03040,cqu04141,cqu04144,cqu04213	heat shock 70 kDa cognate 2	HSP7B_DROMEHeat shock 70 kDa cognate 2 OS=Drosophila melanogaster OX=7227 GN=Hsc70-2 PE=1 SV=2	INVnr_XP_001864723.1_heat_shock_protein_70_B2_[Culex_quinquefasciatus]
CPIJ005332	CYP9J43: cytochrome P450 9J43	12.6636	-1.70802	0.449423	-3.80046	0.000144425	0.000756944		cytochrome P450 9b1	CP9E2_BLAGECytochrome P450 9e2 OS=Blattella germanica OX=6973 GN=CYP9E2 PE=2 SV=1	INVnr_XP_001846774.1_cytochrome_P450_9b1_[Culex_quinquefasciatus]
CPIJ009631	zinc finger protein 24	6.92778	-1.70854	0.526619	-3.24435	0.0011772	0.00472221		zinc finger 24	ZN506_HUMANZinc finger 506 OS=Homo sapiens OX=9606 GN=ZNF506 PE=2 SV=2	INVnr_XP_001850937.1_zinc_finger_protein_24_[Culex_quinquefasciatus]
CPIJ018194	conserved hypothetical protein	22.2054	-1.70992	0.361211	-4.73384	2.2e-06	1.83e-05		KAT8 regulatory NSL complex subunit 2 isoform X3	KANL2_BOVINKAT8 regulatory NSL complex subunit 2 OS=Bos taurus OX=9913 GN=KANSL2 PE=2 SV=1	INVnr_XP_001868870.1_conserved_hypothetical_protein_[Culex_quinquefasciatus]
CPIJ012013	serine protease inhibitor, serpin	10.2073	-1.71045	0.473103	-3.61538	0.000299911	0.0014401		serine protease inhibitor 28Dc	SP28D_DROMESerine protease inhibitor 28Dc OS=Drosophila melanogaster OX=7227 GN=Spn28Dc PE=2 SV=2	INVnr_XP_001861985.1_serine_protease_inhibitor,_serpin_[Culex_quinquefasciatus]
CPIJ001516	conserved hypothetical protein	39.2411	-1.71115	0.301436	-5.67667	1.37e-08	1.83e-07		conserved hypothetical protein	---NA---	INVnr_XP_001843817.1_conserved_hypothetical_protein_[Culex_quinquefasciatus]
CPIJ006434	dihydroxyacetone kinase	141.339	-1.71277	0.194132	-8.82271	1.12e-18	6.1e-17	cqu00051,cqu00561,cqu01100,cqu01200	triokinase FMN cyclase-like	TKFC_MOUSETriokinase FMN cyclase OS=Mus musculus OX=10090 GN=Tkfc PE=1 SV=1	INVnr_XP_001848307.1_dihydroxyacetone_kinase_[Culex_quinquefasciatus]
CPIJ017116	conserved hypothetical protein	44.9794	-1.71696	0.279398	-6.14521	7.99e-10	1.32e-08		conserved hypothetical protein	---NA---	INVnr_XP_001867420.1_conserved_hypothetical_protein_[Culex_quinquefasciatus]
CPIJ007550	FCH and double SH3 domains protein 2	20.4199	-1.72227	0.3802	-4.52992	5.9e-06	4.45e-05		FCH and double SH3 domains 2	FCSD2_HUMANF-BAR and double SH3 domains 2 OS=Homo sapiens OX=9606 GN=FCHSD2 PE=1 SV=3	INVnr_XP_001849666.1_FCH_and_double_SH3_domains_protein_2_[Culex_quinquefasciatus]
CPIJ012260	conserved hypothetical protein	3.81699	-1.72492	0.6037	-2.85724	0.00427337	0.0141922		zinc finger 544	ZG26_XENLAGastrula zinc finger (Fragment) OS=Xenopus laevis OX=8355 PE=3 SV=1	INVnr_XP_001862608.1_conserved_hypothetical_protein_[Culex_quinquefasciatus]
CPIJ001920	conserved hypothetical protein	4.73862	-1.72504	0.581078	-2.96869	0.00299073	0.0104966		E3 ubiquitin- ligase TRIM37	---NA---	INVnr_XP_001843697.1_conserved_hypothetical_protein_[Culex_quinquefasciatus]
CPIJ016412	conserved hypothetical protein	3.91489	-1.72833	0.600231	-2.87945	0.00398371	0.0133944		gastrula zinc finger -like	---NA---	INVnr_XP_001866522.1_conserved_hypothetical_protein_[Culex_quinquefasciatus]
CPIJ014040	conserved hypothetical protein	6.26887	-1.72885	0.539298	-3.20575	0.00134713	0.0053101		XK-related 6	XKR6_HUMANXK-related 6 OS=Homo sapiens OX=9606 GN=XKR6 PE=2 SV=1	INVnr_XP_001864138.1_conserved_hypothetical_protein_[Culex_quinquefasciatus]
CPIJ009369	conserved hypothetical protein	30.4689	-1.73125	0.324967	-5.32746	9.96e-08	1.09e-06		TBC1 domain family member 20	TBC20_MOUSETBC1 domain family member 20 OS=Mus musculus OX=10090 GN=Tbc1d20 PE=1 SV=1	INVnr_XP_001850864.1_conserved_hypothetical_protein_[Culex_quinquefasciatus]
CPIJ012944	fad nad binding oxidoreductases	7.34492	-1.73515	0.52166	-3.3262	0.000880382	0.00368036		yippee-like CG15309 isoform X1	YPL1_DROME yippee-like CG15309 OS=Drosophila melanogaster OX=7227 GN=CG15309 PE=3 SV=1	INVnr_XP_019552764.1_PREDICTED:_protein_yippee-like_CG15309_isoform_X1_[Aedes_albopictus]
CPIJ002750	conserved hypothetical protein	6.32171	-1.73884	0.543106	-3.20166	0.00136639	0.00536504		conserved hypothetical protein	---NA---	INVnr_XP_001844333.1_conserved_hypothetical_protein_[Culex_quinquefasciatus]
CPIJ000827	elbow	18.0587	-1.74032	0.402182	-4.3272	1.51e-05	0.000103884		zinc finger Elbow-like	ELBOW_DROMEZinc finger Elbow OS=Drosophila melanogaster OX=7227 GN=elB PE=1 SV=4	INVnr_XP_001842450.1_elbow_[Culex_quinquefasciatus]
CPIJ012304	poly	82.3939	-1.74989	0.236034	-7.41372	1.23e-13	3.6e-12	cqu03410,cqu04214	poly [ADP-ribose] polymerase	PARP_SARPEPoly	INVnr_XP_001862547.1_poly_[Culex_quinquefasciatus]
CPIJ000972	DNA-directed RNA polymerase, mitochondrial precursor	87.1879	-1.75077	0.233065	-7.51195	5.83e-14	1.82e-12		DNA-directed RNA mitochondrial	RPOM_HUMANDNA-directed RNA mitochondrial OS=Homo sapiens OX=9606 GN=POLRMT PE=1 SV=2	INVnr_XP_001842642.1_DNA-directed_RNA_polymerase,_mitochondrial_[Culex_quinquefasciatus]
CPIJ007658	werner syndrome helicase	12.0722	-1.75097	0.447477	-3.91299	9.12e-05	0.000506012		werner syndrome helicase	WRN_HUMANWerner syndrome ATP-dependent helicase OS=Homo sapiens OX=9606 GN=WRN PE=1 SV=2	INVnr_XP_001849186.1_werner_syndrome_helicase_[Culex_quinquefasciatus]
CPIJ002312	conserved hypothetical protein	73.2912	-1.75112	0.270649	-6.47008	9.8e-11	1.85e-09		FAM13A-like isoform X2	FA13B_MOUSE FAM13B OS=Mus musculus OX=10090 GN=Fam13b PE=1 SV=1	INVnr_XP_001843981.1_conserved_hypothetical_protein_[Culex_quinquefasciatus]
CPIJ006606	molybdopterin cofactor synthesis protein a	307.926	-1.75179	0.149048	-11.7532	6.8e-32	1.09e-29	cqu00790,cqu01100	molybdopterin cofactor synthesis a	MOCS1_DROMEMolybdenum cofactor biosynthesis 1 OS=Drosophila melanogaster OX=7227 GN=Mocs1 PE=2 SV=1	INVnr_XP_001848384.1_molybdopterin_cofactor_synthesis_protein_a_[Culex_quinquefasciatus]
CPIJ010600	conserved hypothetical protein	17.6884	-1.75251	0.398799	-4.39445	1.11e-05	7.88e-05		conserved hypothetical protein	BTBD6_MOUSEBTB POZ domain-containing 6 OS=Mus musculus OX=10090 GN=Btbd6 PE=2 SV=2	INVnr_XP_001870836.1_conserved_hypothetical_protein_[Culex_quinquefasciatus]
CPIJ013878	hypothetical protein	38.4976	-1.75435	0.291685	-6.01454	1.8e-09	2.83e-08		hypothetical protein CpipJ_CPIJ013878	---NA---	INVnr_XP_001864121.1_hypothetical_protein_CpipJ_CPIJ013878_[Culex_quinquefasciatus]
CPIJ010546	CYP9J34: cytochrome P450 9J34	440.395	-1.75646	0.155864	-11.2692	1.86e-29	2.39e-27		cytochrome P450 9c1	CP9E2_BLAGECytochrome P450 9e2 OS=Blattella germanica OX=6973 GN=CYP9E2 PE=2 SV=1	INVnr_XP_001855254.1_cytochrome_P450_9c1_[Culex_quinquefasciatus]
CPIJ006267	LRIM16: leucine-rich immune protein (TM)	25.9005	-1.75656	0.343936	-5.10725	3.27e-07	3.23e-06		leucine-rich repeats and immunoglobulin-like domains 1	CPN2_HUMANCarboxypeptidase N subunit 2 OS=Homo sapiens OX=9606 GN=CPN2 PE=1 SV=3	INVnr_XP_019526840.1_PREDICTED:_leucine-rich_repeats_and_immunoglobulin-like_domains_protein_1_[Aedes_albopictus]
CPIJ013686	signal transduction protein lnk-realted	31.4179	-1.75796	0.317389	-5.53881	3.05e-08	3.79e-07		SH2B adapter 2 isoform X1	SH2B1_RATSH2B adapter 1 OS=Rattus norvegicus OX=10116 GN=Sh2b1 PE=1 SV=1	INVnr_XP_001864019.1_signal_transduction_protein_lnk-realted_[Culex_quinquefasciatus]
CPIJ018923	conserved hypothetical protein	94.2581	-1.76635	0.214769	-8.22444	1.96e-16	8.32e-15		conserved hypothetical protein	---NA---	INVnr_XP_001869176.1_conserved_hypothetical_protein_[Culex_quinquefasciatus]
CPIJ008603	conserved hypothetical protein	16.0666	-1.76964	0.424911	-4.16473	3.12e-05	0.000196399		conserved hypothetical protein	SAAL1_DANRE saal1 OS=Danio rerio OX=7955 GN=saal1 PE=2 SV=2	INVnr_XP_001850345.1_conserved_hypothetical_protein_[Culex_quinquefasciatus]
CPIJ011527	VAC14	28.0798	-1.77133	0.345511	-5.1267	2.95e-07	2.94e-06		VAC14 homolog	VAC14_DANRE VAC14 homolog OS=Danio rerio OX=7955 GN=vac14 PE=2 SV=1	INVnr_XP_001861850.1_VAC14_[Culex_quinquefasciatus]
CPIJ011525	conserved hypothetical protein	52.4847	-1.77241	0.28527	-6.21309	5.2e-10	8.75e-09		exonuclease mut-7 homolog	MUT7_AEDAEExonuclease mut-7 homolog OS=Aedes aegypti OX=7159 GN=AAEL005527 PE=3 SV=1	INVnr_XP_001861848.1_conserved_hypothetical_protein_[Culex_quinquefasciatus]
CPIJ002629	sensory appendage protein, putative	77.6571	-1.77303	0.275637	-6.4325	1.26e-10	2.31e-09		sensory appendage	PEB3_DROMEEjaculatory bulb-specific 3 OS=Drosophila melanogaster OX=7227 GN= PE=2 SV=2	INVnr_XP_001844698.1_sensory_appendage_protein_[Culex_quinquefasciatus]
CPIJ001512	zinc finger protein	7.2813	-1.77317	0.529639	-3.34788	0.000814315	0.00345544		zinc finger	ZN615_HUMANZinc finger 615 OS=Homo sapiens OX=9606 GN=ZNF615 PE=2 SV=2	INVnr_XP_001843813.1_zinc_finger_protein_[Culex_quinquefasciatus]
CPIJ008292	conserved hypothetical protein	26.5057	-1.77628	0.359287	-4.9439	7.66e-07	7.01e-06		zinc finger weckle-like	ZFP26_MOUSEZinc finger 26 OS=Mus musculus OX=10090 GN=Zfp26 PE=2 SV=2	INVnr_XP_001849408.1_conserved_hypothetical_protein_[Culex_quinquefasciatus]
CPIJ007517	protein kinase C-binding protein 1	74.6109	-1.78006	0.230518	-7.72201	1.15e-14	3.88e-13		kinase C-binding 1-like isoform X1	PKCB1_HUMAN kinase C-binding 1 OS=Homo sapiens OX=9606 GN=ZMYND8 PE=1 SV=2	INVnr_XP_001849331.1_kinase_C-binding_protein_1_[Culex_quinquefasciatus]
CPIJ009644	anaphase-promoting complex subunit 4	16.3909	-1.78562	0.410615	-4.34864	1.37e-05	9.52e-05	cqu04120	anaphase-promoting complex subunit 4	APC4_HUMANAnaphase-promoting complex subunit 4 OS=Homo sapiens OX=9606 GN=ANAPC4 PE=1 SV=2	INVnr_XP_001850950.1_anaphase-promoting_complex_subunit_4_[Culex_quinquefasciatus]
CPIJ001820	larval serum protein 2 precursor	60.7348	-1.79665	0.630554	-2.84931	0.00438136	0.0144826		larval serum 2	HEXA_ANOGAHexamerin- OS=Anopheles gambiae OX=7165 GN= PE=2 SV=2	INVnr_XP_001843494.1_larval_serum_protein_2_[Culex_quinquefasciatus]
CPIJ011864	zinc finger protein 14	21.7803	-1.79771	0.370815	-4.848	1.25e-06	1.09e-05		zinc finger 14	ZN484_HUMANZinc finger 484 OS=Homo sapiens OX=9606 GN=ZNF484 PE=1 SV=1	INVnr_XP_001862239.1_zinc_finger_protein_14_[Culex_quinquefasciatus]
CPIJ020318	conserved hypothetical protein	5.82311	-1.80187	0.553145	-3.25749	0.00112401	0.00453207		cAMP-responsive element-binding -like 2	CRBL2_RA -responsive element-binding -like 2 OS=Rattus norvegicus OX=10116 GN=Crebl2 PE=2 SV=1	INVnr_XP_001870591.1_conserved_hypothetical_protein_[Culex_quinquefasciatus]
CPIJ015878	conserved hypothetical protein	4.01447	-1.80588	0.598241	-3.01866	0.00253896	0.00912471		conserved hypothetical protein	---NA---	INVnr_XP_001866435.1_conserved_hypothetical_protein_[Culex_quinquefasciatus]
CPIJ016316	pupal cuticle protein 78E, putative	4.05622	-1.81386	0.597646	-3.03501	0.00240525	0.00871084		pupal cuticle 78E	CUD5_SCHGREndocuticle structural glyco bd-5 OS=Schistocerca gregaria OX=7010 PE=1 SV=1	INVnr_XP_001866497.1_pupal_cuticle_protein_78E_[Culex_quinquefasciatus]
CPIJ000942	Misexpression suppressor of ras, putative	6.67337	-1.81409	0.539218	-3.3643	0.000767375	0.00328595		Misexpression suppressor of ras	---NA---	INVnr_XP_001842612.1_Misexpression_suppressor_of_ras_[Culex_quinquefasciatus]
CPIJ001777	ataxia telangiectasia mutated, putative	18.5007	-1.82209	0.390768	-4.66285	3.12e-06	2.48e-05	cqu03440,cqu04068,cqu04214	ataxia telangiectasia mutated	ATM_DROMESerine threonine- kinase ATM OS=Drosophila melanogaster OX=7227 GN=tefu PE=2 SV=1	INVnr_XP_001843451.1_ataxia_telangiectasia_mutated_[Culex_quinquefasciatus]
CPIJ006273	conserved hypothetical protein	17.0366	-1.82321	0.405489	-4.49634	6.91e-06	5.11e-05		class 1 class 3 D E isoforms	BUN1_DROME class 1 class 3 D E isoforms OS=Drosophila melanogaster OX=7227 GN=bun PE=2 SV=2	INVnr_XP_001847739.1_conserved_hypothetical_protein_[Culex_quinquefasciatus]
CPIJ007984	f-box/lrr protein, putative	118.783	-1.8261	0.22028	-8.2899	1.13e-16	4.99e-15		f-box lrr	LRC29_HUMANLeucine-rich repeat-containing 29 OS=Homo sapiens OX=9606 GN=LRRC29 PE=1 SV=1	INVnr_XP_001849938.1_f-box/lrr_protein_[Culex_quinquefasciatus]
CPIJ007260	conserved hypothetical protein	5.97806	-1.8402	0.551141	-3.3389	0.000841115	0.0035372		DNA-dependent kinase catalytic subunit-like	PRKDC_CHICKDNA-dependent kinase catalytic subunit OS=Gallus gallus OX=9031 GN=PRKDC PE=2 SV=1	INVnr_XP_001848796.1_conserved_hypothetical_protein_[Culex_quinquefasciatus]
CPIJ002735	conserved hypothetical protein	8.46881	-1.84049	0.500338	-3.67849	0.000234617	0.00115894		conserved hypothetical protein	---NA---	INVnr_XP_001844318.1_conserved_hypothetical_protein_[Culex_quinquefasciatus]
CPIJ009567	ornithine decarboxylase	98.6961	-1.84173	0.242016	-7.60996	2.74e-14	8.9e-13		ornithine decarboxylase	DCOR_RATOrnithine decarboxylase OS=Rattus norvegicus OX=10116 GN=Odc1 PE=1 SV=1	INVnr_XP_001851194.1_ornithine_decarboxylase_[Culex_quinquefasciatus]
CPIJ010509	conserved hypothetical protein	5.23291	-1.84441	0.575069	-3.20729	0.00133992	0.00529652		neuralized 2	NEUL2_MOUSENeuralized 2 OS=Mus musculus OX=10090 GN=Neurl2 PE=1 SV=1	INVnr_XP_001853641.1_conserved_hypothetical_protein_[Culex_quinquefasciatus]
CPIJ016555	conserved hypothetical protein	11.3832	-1.84769	0.466191	-3.96338	7.39e-05	0.000422169		conserved hypothetical protein	SIAH1_CAEBRE3 ubiquitin- ligase siah-1 OS=Caenorhabditis briggsae OX=6238 GN=siah-1 PE=3 SV=2	INVnr_XP_001867212.1_conserved_hypothetical_protein_[Culex_quinquefasciatus]
CPIJ001764	chorion peroxidase precursor	9.33691	-1.84976	0.489503	-3.77886	0.000157548	0.000814211		chorion peroxidase	PERO_DROMEPeroxidase OS=Drosophila melanogaster OX=7227 GN=Pxd PE=2 SV=2	INVnr_XP_001843438.1_chorion_peroxidase_[Culex_quinquefasciatus]
CPIJ004766	transmembrane protein 87A precursor	11.0702	-1.85107	0.469095	-3.94604	7.95e-05	0.000448464		transmembrane 87A	TM87A_XENTRTransmembrane 87A OS=Xenopus tropicalis OX=8364 GN=tmem87a PE=2 SV=1	INVnr_XP_001846376.1_transmembrane_protein_87A_[Culex_quinquefasciatus]
CPIJ003765	fanconi anemia group J protein	42.9633	-1.85496	0.287802	-6.44527	1.15e-10	2.14e-09		regulator of telomere elongation helicase 1 homolog	RTEL1_CULQURegulator of telomere elongation helicase 1 homolog OS=Culex quinquefasciatus OX=7176 GN=CPIJ003765 PE=3 SV=1	INVnr_XP_001845338.1_fanconi_anemia_group_J_protein_[Culex_quinquefasciatus]
CPIJ010277	calpain, putative	4.25257	-1.85524	0.595535	-3.11526	0.00183786	0.00693405		calpain-B isoform X4	CANA_DROMECalpain-A OS=Drosophila melanogaster OX=7227 GN= PE=1 SV=2	INVnr_XP_001853086.1_calpain_[Culex_quinquefasciatus]
CPIJ018222	alpha-amylase B precursor	699.618	-1.85993	0.160659	-11.5769	5.4e-31	8.09e-29	cqu00500,cqu01100	alpha-amylase A	AMYA_DROMAAlpha-amylase A OS=Drosophila mauritiana OX=7226 GN=Amy-d PE=3 SV=1	INVnr_XP_001868570.1_alpha-amylase_B_[Culex_quinquefasciatus]
CPIJ002025	conserved hypothetical protein	178.397	-1.86075	0.192434	-9.66956	4.06e-22	3.18e-20	cqu04140	zinc finger FYVE domain-containing 1-like isoform X1	ZFYV1_MOUSEZinc finger FYVE domain-containing 1 OS=Mus musculus OX=10090 GN=Zfyve1 PE=1 SV=2	INVnr_XP_001843564.1_conserved_hypothetical_protein_[Culex_quinquefasciatus]
CPIJ014239	conserved hypothetical protein	4.26699	-1.86267	0.594274	-3.13436	0.00172229	0.00654713		conserved hypothetical protein	TAKT_DROME takeout OS=Drosophila melanogaster OX=7227 GN=to PE=2 SV=1	INVnr_XP_001864318.1_conserved_hypothetical_protein_[Culex_quinquefasciatus]
CPIJ003381	protein SERAC1	76.38	-1.8636	0.242498	-7.68499	1.53e-14	5.06e-13		SERAC1-like isoform X1	SRAC1_BOVIN SERAC1 OS=Bos taurus OX=9913 GN=SERAC1 PE=2 SV=1	INVnr_XP_001844826.1_SERAC1_[Culex_quinquefasciatus]
CPIJ006419	monocarboxylate transporter	5.18554	-1.86482	0.570657	-3.26785	0.00108367	0.00439963		monocarboxylate transporter	MOT8_RATMonocarboxylate transporter 8 OS=Rattus norvegicus OX=10116 GN=SLC16A2 PE=1 SV=1	INVnr_XP_001848293.1_monocarboxylate_transporter_[Culex_quinquefasciatus]
CPIJ000600	conserved hypothetical protein	5.14985	-1.86737	0.571811	-3.2657	0.00109192	0.00442804		conserved hypothetical protein	---NA---	INVnr_XP_001842363.1_conserved_hypothetical_protein_[Culex_quinquefasciatus]
CPIJ017892	replication factor C large subunit, putative	22.0406	-1.87619	0.373153	-5.02794	4.96e-07	4.72e-06	cqu03030,cqu03420,cqu03430	replication factor C large subunit	RFC1_DROMEReplication factor C subunit 1 OS=Drosophila melanogaster OX=7227 GN=Gnf1 PE=1 SV=2	INVnr_XP_001868075.1_replication_factor_C_large_subunit_[Culex_quinquefasciatus]
CPIJ019319	F-actin capping protein subunit beta	5.2896	-1.88139	0.575045	-3.27173	0.00106891	0.00434473	cqu04144	F-actin capping subunit beta	CAPZB_DROMEF-actin-capping subunit beta OS=Drosophila melanogaster OX=7227 GN=cpb PE=2 SV=1	INVnr_XP_001869601.1_F-actin_capping_protein_subunit_beta_[Culex_quinquefasciatus]
CPIJ005737	ubiquitin specific protease 52 / poly(a) ribonuclease subunit pan2	31.5509	-1.88158	0.322398	-5.8362	5.34e-09	7.68e-08	cqu03018	ubiquitin specific protease 52	PAN2_DROMEPAN2-PAN3 deadenylation complex catalytic subunit PAN2 OS=Drosophila melanogaster OX=7227 GN=PAN2 PE=1 SV=1	INVnr_XP_001847161.1_ubiquitin_specific_protease_52_[Culex_quinquefasciatus]
CPIJ004852	conserved hypothetical protein	195.425	-1.88692	0.213943	-8.81976	1.15e-18	6.22e-17		conserved hypothetical protein	WAPA_BACP 3(Ser)-specific nuclease OS=Bacillus subtilis spizizenii (strain TU-B-10) OX=1052585 GN=wapA PE=1 SV=1	INVnr_XP_001846501.1_conserved_hypothetical_protein_[Culex_quinquefasciatus]
CPIJ008260	alsin, putative	32.0709	-1.8916	0.320964	-5.8935	3.78e-09	5.57e-08		alsin homolog	ALS2_DROMEAlsin homolog OS=Drosophila melanogaster OX=7227 GN=Als2 PE=1 SV=1	INVnr_XP_001849637.1_alsin_[Culex_quinquefasciatus]
CPIJ003643	conserved hypothetical protein	4.29705	-1.89565	0.59446	-3.18886	0.00142835	0.00556794		conserved hypothetical protein	---NA---	INVnr_XP_001845422.1_conserved_hypothetical_protein_[Culex_quinquefasciatus]
CPIJ013990	conserved hypothetical protein	7.17047	-1.89666	0.531904	-3.56579	0.000362766	0.00170241		probable Ras GTPase-activating isoform X1	---NA---	INVnr_XP_001864051.1_conserved_hypothetical_protein_[Culex_quinquefasciatus]
CPIJ004184	DNA-repair protein complementing XP-G cells	22.393	-1.90005	0.373133	-5.09214	3.54e-07	3.47e-06	cqu03420	DNA-repair complementing XP-G cells	ERCC5_HUMANDNA repair complementing XP-G cells OS=Homo sapiens OX=9606 GN=ERCC5 PE=1 SV=3	INVnr_XP_001845908.1_DNA-repair_protein_complementing_XP-G_cells_[Culex_quinquefasciatus]
CPIJ003793	BTB/POZ domain-containing protein 9	116.594	-1.90215	0.209579	-9.07604	1.13e-19	6.84e-18		BTB POZ domain-containing 9	BTBD9_DROMEBTB POZ domain-containing 9 OS=Drosophila melanogaster OX=7227 GN=BTBD9 PE=1 SV=1	INVnr_XP_001845366.1_BTB/POZ_domain-containing_protein_9_[Culex_quinquefasciatus]
CPIJ012067	orphan sodium	8.92979	-1.90602	0.498873	-3.82065	0.000133098	0.000708112		sodium-dependent nutrient amino acid transporter 1	NAAT1_DROWISodium-dependent nutrient amino acid transporter 1 OS=Drosophila willistoni OX=7260 GN=NAAT1 PE=3 SV=1	INVnr_XP_001862446.1_conserved_hypothetical_protein_[Culex_quinquefasciatus]
CPIJ018620	conserved hypothetical protein	18.7405	-1.9072	0.396158	-4.81425	1.48e-06	1.27e-05		cysteine and histidine-rich 1 homolog	CYHR1_DROMECysteine and histidine-rich 1 homolog OS=Drosophila melanogaster OX=7227 GN=CG32486 PE=2 SV=2	INVnr_XP_001868815.1_conserved_hypothetical_protein_[Culex_quinquefasciatus]
CPIJ005253	conserved hypothetical protein	23.8248	-1.90824	0.357705	-5.33468	9.57e-08	1.05e-06		neuralized 4	NEUL4_XENTRNeuralized 4 OS=Xenopus tropicalis OX=8364 GN=neurl4 PE=2 SV=1	INVnr_XP_001847572.1_conserved_hypothetical_protein_[Culex_quinquefasciatus]
CPIJ004730	conserved hypothetical protein	814.376	-1.90879	0.32904	-5.80109	6.59e-09	9.36e-08		conserved hypothetical protein	---NA---	INVnr_XP_001846754.1_conserved_hypothetical_protein_[Culex_quinquefasciatus]
CPIJ004443	origin recognition complex subunit	16.1547	-1.91539	0.412158	-4.64722	3.36e-06	2.65e-05		origin recognition complex subunit	ORC5_DROMEOrigin recognition complex subunit 5 OS=Drosophila melanogaster OX=7227 GN=Orc5 PE=1 SV=1	INVnr_XP_001846029.1_origin_recognition_complex_subunit_[Culex_quinquefasciatus]
CPIJ006112	conserved hypothetical protein	6.29221	-1.92035	0.552478	-3.47588	0.000509177	0.00228158		conserved hypothetical protein	---NA---	INVnr_XP_001847995.1_conserved_hypothetical_protein_[Culex_quinquefasciatus]
CPIJ001746	conserved hypothetical protein	51.0954	-1.92058	0.645145	-2.97698	0.00291103	0.0102475		conserved hypothetical protein	---NA---	INVnr_XP_001843611.1_conserved_hypothetical_protein_[Culex_quinquefasciatus]
CPIJ011086	conserved hypothetical protein	4.37722	-1.9219	0.594516	-3.23272	0.00122618	0.0048936		zinc finger 777	---NA---	INVnr_XP_001861441.1_conserved_hypothetical_protein_[Culex_quinquefasciatus]
CPIJ003787	conserved hypothetical protein	93.2575	-1.92648	0.259045	-7.43683	1.03e-13	3.07e-12		conserved hypothetical protein	---NA---	INVnr_XP_001845360.1_conserved_hypothetical_protein_[Culex_quinquefasciatus]
CPIJ011293	conserved hypothetical protein	7.19072	-1.93272	0.529628	-3.6492	0.000263056	0.001285		gamma-tubulin complex component 6	GCP6_HUMANGamma-tubulin complex component 6 OS=Homo sapiens OX=9606 GN=TUBGCP6 PE=1 SV=3	INVnr_XP_001861522.1_conserved_hypothetical_protein_[Culex_quinquefasciatus]
CPIJ005906	conserved hypothetical protein	4.5322	-1.93533	0.592468	-3.26656	0.00108863	0.00441722		conserved hypothetical protein	---NA---	INVnr_XP_001847731.1_conserved_hypothetical_protein_[Culex_quinquefasciatus]
CPIJ009553	hypothetical protein	56.4306	-1.93549	0.2578	-7.5077	6.02e-14	1.85e-12		hypothetical protein CpipJ_CPIJ009553	---NA---	INVnr_XP_001851038.1_hypothetical_protein_CpipJ_CPIJ009553_[Culex_quinquefasciatus]
CPIJ003907	conserved hypothetical protein	35.4744	-1.95057	0.311556	-6.26072	3.83e-10	6.63e-09	cqu04068,cqu04137,cqu04140	BCL2 adenovirus E1B 19 kDa -interacting 3 isoform X1	BNIP3_MOUSEBCL2 adenovirus E1B 19 kDa -interacting 3 OS=Mus musculus OX=10090 GN=Bnip3 PE=1 SV=1	INVnr_XP_001845575.1_conserved_hypothetical_protein_[Culex_quinquefasciatus]
CPIJ004115	DNA repair protein RAD50	39.7595	-1.95084	0.307133	-6.35177	2.13e-10	3.82e-09	cqu03440,cqu03450	DNA repair RAD50	RAD50_DROMEDNA repair RAD50 OS=Drosophila melanogaster OX=7227 GN=rad50 PE=2 SV=4	INVnr_XP_001845783.1_DNA_repair_protein_RAD50_[Culex_quinquefasciatus]
CPIJ005229	N-acetylgalactosaminyltransferase 6	9.9696	-1.95369	0.493804	-3.95641	7.61e-05	0.000432901	cqu00512,cqu01100	N-acetyl galactosaminyl transferase 6	GALT6_DROMEN-acetylgalactosaminyltransferase 6 OS=Drosophila melanogaster OX=7227 GN=pgant6 PE=2 SV=2	INVnr_XP_001847548.1_N-acetyl_galactosaminyl_transferase_6_[Culex_quinquefasciatus]
CPIJ016093	conserved hypothetical protein	74.5634	-1.96189	0.240731	-8.14972	3.65e-16	1.46e-14		osteopetrosis-associated transmembrane 1	OSTM1_MOUSEOsteopetrosis-associated transmembrane 1 OS=Mus musculus OX=10090 GN=Ostm1 PE=1 SV=1	INVnr_XP_001866622.1_conserved_hypothetical_protein_[Culex_quinquefasciatus]
CPIJ005246	abhydrolase domain-containing protein 7	25.7859	-1.96478	0.368499	-5.33184	9.72e-08	1.07e-06		abhydrolase domain-containing 7	CEEH1_CAEELEpoxide hydrolase 1 OS=Caenorhabditis elegans OX=6239 GN=ceeh-1 PE=1 SV=1	INVnr_XP_001847565.1_abhydrolase_domain-containing_protein_7_[Culex_quinquefasciatus]
CPIJ003392	morphine 6-dehydrogenase .	24.1314	-1.96658	0.383537	-5.12748	2.94e-07	2.93e-06	cqu00040,cqu00051,cqu00052,cqu00561,cqu00790,cqu01100	aldose reductase	A1A1A_DANREAlcohol dehydrogenase	INVnr_XP_001844837.1_morphine_6-dehydrogenase_[Culex_quinquefasciatus]
CPIJ015734	conserved hypothetical protein	165.712	-1.96809	0.401914	-4.8968	9.74e-07	8.7e-06		conserved hypothetical protein	---NA---	INVnr_XP_001865881.1_conserved_hypothetical_protein_[Culex_quinquefasciatus]
CPIJ006605	endothelial precursor protein B9	143.537	-1.96877	0.189053	-10.4139	2.14e-25	2.22e-23		endothelial precursor B9	B9D1_XENLAB9 domain-containing 1 OS=Xenopus laevis OX=8355 GN=b9d1 PE=2 SV=1	INVnr_XP_001848383.1_endothelial_precursor_protein_B9_[Culex_quinquefasciatus]
CPIJ000538	tuftelin-interacting protein 11	60.2935	-1.96908	0.254458	-7.73834	1.01e-14	3.44e-13		tuftelin-interacting 11	TFP11_DROMESeptin-interacting 1 OS=Drosophila melanogaster OX=7227 GN=sip1 PE=1 SV=1	INVnr_XP_001842208.1_tuftelin-interacting_protein_11_[Culex_quinquefasciatus]
CPIJ019282	NudC domain containing 1	150.829	-1.97587	0.186352	-10.6029	2.89e-26	3.13e-24		nudC domain-containing 1	NUDC1_MOUSE domain-containing 1 OS=Mus musculus OX=10090 GN=Nudcd1 PE=1 SV=2	INVnr_XP_001869569.1_NudC_domain_containing_1_[Culex_quinquefasciatus]
CPIJ019523	conserved hypothetical protein	36.8849	-1.97696	0.309731	-6.38283	1.74e-10	3.14e-09		conserved hypothetical protein, partial	SECA2_NITMU translocase subunit 2 OS=Nitrosospira multiformis (strain ATCC 25196 NCIMB 11849 C 71) OX=323848 GN=secA2 PE=3 SV=1	INVnr_XP_001870434.1_conserved_hypothetical_protein,_partial_[Culex_quinquefasciatus]
CPIJ012218	rhogtpase	115.358	-1.97799	0.22763	-8.68949	3.64e-18	1.87e-16	cqu04120	rho GTPase	RHBT1_HUMANRho-related BTB domain-containing 1 OS=Homo sapiens OX=9606 GN=RHOBTB1 PE=2 SV=2	INVnr_XP_001862359.1_rho_GTPase_[Culex_quinquefasciatus]
CPIJ004349	predicted protein	3.71234	-1.98241	0.614662	-3.22521	0.00125881	0.00500963		zinc finger	PLAL2_HUMANZinc finger PLAGL2 OS=Homo sapiens OX=9606 GN=PLAGL2 PE=1 SV=1	INVnr_XP_001846108.1_predicted_protein_[Culex_quinquefasciatus]
CPIJ010806	conserved hypothetical protein	522.32	-1.98701	0.577329	-3.44173	0.000578	0.00255422		conserved hypothetical protein	CBPB_ASTASCarboxypeptidase B OS=Astacus astacus OX=6715 PE=1 SV=1	INVnr_XP_001856196.1_conserved_hypothetical_protein_[Culex_quinquefasciatus]
CPIJ012914	cyclin t	70.4479	-1.9954	0.254144	-7.85145	4.11e-15	1.48e-13		cyclin T	CCNT_DROMECyclin-T OS=Drosophila melanogaster OX=7227 GN= PE=1 SV=2	INVnr_XP_001863201.1_cyclin_T_[Culex_quinquefasciatus]
CPIJ006105	cyclin-dependent kinases regulatory subunit 1	3.82728	-1.99738	0.612995	-3.25839	0.00112047	0.00452382		cyclin-dependent kinaseregulatory subunit 1	CKS1_DROMECyclin-dependent kinases regulatory subunit OS=Drosophila melanogaster OX=7227 GN=Cks30A PE=3 SV=1	INVnr_XP_001847988.1_cyclin-dependent_kinaseregulatory_subunit_1_[Culex_quinquefasciatus]
CPIJ005106	conserved hypothetical protein	7.78803	-2.00115	0.529268	-3.78098	0.000156214	0.000809692		leucine-rich repeat-containing 20 isoform X1	SHOC2_CAEELLeucine-rich repeat soc-2 OS=Caenorhabditis elegans OX=6239 GN=soc-2 PE=1 SV=3	INVnr_XP_001846916.1_conserved_hypothetical_protein_[Culex_quinquefasciatus]
CPIJ017371	phd finger protein	19.6058	-2.00324	0.389422	-5.14413	2.69e-07	2.71e-06		phd finger	BRPF1_MOUSEPeregrin OS=Mus musculus OX=10090 GN=Brpf1 PE=1 SV=1	INVnr_XP_001867456.1_phd_finger_protein_[Culex_quinquefasciatus]
CPIJ017035	zinc finger protein 141	6.84389	-2.00408	0.544839	-3.6783	0.00023479	0.00115898		zinc finger 141	ZSC22_HUMANZinc finger and SCAN domain-containing 22 OS=Homo sapiens OX=9606 GN=ZSCAN22 PE=1 SV=2	INVnr_XP_001867506.1_zinc_finger_protein_141_[Culex_quinquefasciatus]
CPIJ019751	CYP6AG16: cytochrome P450 6AG16	12.4718	-2.00614	0.455968	-4.39974	1.08e-05	7.7e-05		cytochrome P450 6A1	C28D1_DROMEProbable cytochrome P450 28d1 OS=Drosophila melanogaster OX=7227 GN=Cyp28d1 PE=2 SV=1	INVnr_XP_001869955.1_cytochrome_P450_6A1_[Culex_quinquefasciatus]
CPIJ000178	zinc finger protein 60	15.2014	-2.02873	0.433402	-4.68094	2.86e-06	2.31e-05		zinc finger 60	ZN710_MOUSEZinc finger 710 OS=Mus musculus OX=10090 GN=Znf710 PE=2 SV=1	INVnr_XP_001841943.1_zinc_finger_protein_60_[Culex_quinquefasciatus]
CPIJ005565	nucleosomal histone kinase 1	17.6411	-2.03932	0.410818	-4.96405	6.9e-07	6.37e-06		nucleosomal histone kinase 1	NHK1_DROMENucleosomal histone kinase 1 OS=Drosophila melanogaster OX=7227 GN=ball PE=1 SV=1	INVnr_XP_001847805.1_nucleosomal_histone_kinase_1_[Culex_quinquefasciatus]
CPIJ020236	dipeptidyl peptidase iii	8.89905	-2.04504	0.510646	-4.0048	6.21e-05	0.000360019		dipeptidyl peptidase III	DPP3_DROMEDipeptidyl peptidase 3 OS=Drosophila melanogaster OX=7227 GN= PE=2 SV=2	INVnr_XP_001870646.1_dipeptidyl_peptidase_III_[Culex_quinquefasciatus]
CPIJ007777	conserved hypothetical protein	297.526	-2.046	0.200634	-10.1977	2.03e-24	1.93e-22		salivary secreted peptide	---NA---	INVnr_XP_001849280.1_conserved_hypothetical_protein_[Culex_quinquefasciatus]
CPIJ000365	conserved hypothetical protein	7.00533	-2.0672	0.542335	-3.81167	0.000138031	0.000729399		transcriptional repressor CTCF	---NA---	INVnr_XP_001842035.1_conserved_hypothetical_protein_[Culex_quinquefasciatus]
CPIJ013499	zinc finger and SCAN domain-containing protein 21	38.5641	-2.06944	0.312396	-6.62442	3.49e-11	7.08e-10		zinc finger 708	ZN235_HUMANZinc finger 235 OS=Homo sapiens OX=9606 GN=ZNF235 PE=2 SV=3	INVnr_XP_001863734.1_zinc_finger_and_SCAN_domain-containing_protein_21_[Culex_quinquefasciatus]
CPIJ012029	conserved hypothetical protein	57.7608	-2.07253	0.261977	-7.91111	2.55e-15	9.26e-14		golgin-45 isoform X1	GO45_HUMANGolgin-45 OS=Homo sapiens OX=9606 GN=BLZF1 PE=1 SV=2	INVnr_XP_001862296.1_conserved_hypothetical_protein_[Culex_quinquefasciatus]
CPIJ020224	conserved hypothetical protein	5.01261	-2.08831	0.58531	-3.56787	0.000359898	0.00169234		telomere-associated RIF1-like isoform X2	---NA---	INVnr_XP_001870419.1_conserved_hypothetical_protein_[Culex_quinquefasciatus]
CPIJ011816	ccr4-not transcription complex	32.1601	-2.09418	0.331066	-6.32555	2.52e-10	4.47e-09		ccr4-not transcription complex	RL18A_DROME60S ribosomal L18a OS=Drosophila melanogaster OX=7227 GN= 18A PE=1 SV=1	INVnr_XP_001861996.1_ccr4-not_transcription_complex_[Culex_quinquefasciatus]
CPIJ016727	muskelin	105.998	-2.09651	0.229096	-9.15123	5.63e-20	3.54e-18		muskelin isoform X2	MKLN1_RATMuskelin OS=Rattus norvegicus OX=10116 GN=Mkln1 PE=1 SV=1	INVnr_XP_001867373.1_muskelin_[Culex_quinquefasciatus]
CPIJ001822	larval serum protein 2 precursor	25.6949	-2.09743	0.608093	-3.44919	0.000562264	0.00248781		larval serum 2	HEXA_ANOGAHexamerin- OS=Anopheles gambiae OX=7165 GN= PE=2 SV=2	INVnr_XP_001843496.1_larval_serum_protein_2_[Culex_quinquefasciatus]
CPIJ008074	glucosamine-6-phosphate isomerase	160.204	-2.10434	0.196364	-10.7165	8.52e-27	9.37e-25	cqu00520,cqu01100	glucosamine-6-phosphate isomerase isoform X1	GNPI_AEDAEGlucosamine-6-phosphate isomerase OS=Aedes aegypti OX=7159 GN=Gnpda1 PE=3 SV=1	INVnr_XP_001849348.1_glucosamine-6-phosphate_isomerase_[Culex_quinquefasciatus]
CPIJ008308	conserved hypothetical protein	106.59	-2.10493	0.220289	-9.55532	1.23e-21	8.82e-20		aprataxin and PNK-like factor isoform X4	APLF_DROMEAprataxin and PNK-like factor OS=Drosophila melanogaster OX=7227 GN=CG6171 PE=1 SV=1	INVnr_XP_001849424.1_conserved_hypothetical_protein_[Culex_quinquefasciatus]
CPIJ003983	conserved hypothetical protein	23.7023	-2.11644	0.410166	-5.15996	2.47e-07	2.5e-06		proteoglycan 4-like	---NA---	INVnr_XP_001845665.1_conserved_hypothetical_protein_[Culex_quinquefasciatus]
CPIJ007054	alpha-tocopherol transfer protein	84.562	-2.14066	0.262822	-8.1449	3.8e-16	1.51e-14		alpha-tocopherol transfer	CLVS1_HUMANClavesin-1 OS=Homo sapiens OX=9606 GN=CLVS1 PE=1 SV=1	INVnr_XP_001848583.1_alpha-tocopherol_transfer_protein_[Culex_quinquefasciatus]
CPIJ002361	sodium/solute symporter, putative	421.432	-2.14159	0.393873	-5.43727	5.41e-08	6.27e-07		sodium solute symporter	SC5A8_MOUSESodium-coupled monocarboxylate transporter 1 OS=Mus musculus OX=10090 GN=Slc5a8 PE=1 SV=1	INVnr_XP_001844105.1_sodium/solute_symporter_[Culex_quinquefasciatus]
CPIJ013215	conserved hypothetical protein	64.506	-2.14257	0.273772	-7.82613	5.03e-15	1.77e-13		NEDD4-binding 2	N42L1_MOUSENEDD4-binding 2-like 1 OS=Mus musculus OX=10090 GN=N4bp2l1 PE=2 SV=1	INVnr_XP_001863339.1_conserved_hypothetical_protein_[Culex_quinquefasciatus]
CPIJ016903	signal peptidase complex subunit 3	20.3933	-2.14735	0.39099	-5.49209	3.97e-08	4.75e-07	cqu03060	signal peptidase complex subunit 3	SPCS3_DROMESignal peptidase complex subunit 3 OS=Drosophila melanogaster OX=7227 GN=Spase22-23 PE=2 SV=1	INVnr_XP_001870059.1_signal_peptidase_complex_subunit_3_[Culex_quinquefasciatus]
CPIJ005907	conserved hypothetical protein	2962.11	-2.15939	0.127755	-16.9026	4.3e-64	2.75e-61		conserved hypothetical protein	---NA---	INVnr_XP_001847732.1_conserved_hypothetical_protein_[Culex_quinquefasciatus]
CPIJ013616	trypsin 5 precursor	52.588	-2.17124	0.57542	-3.77332	0.000161091	0.000829477		trypsin 5	TRY7_ANOGATrypsin-7 OS=Anopheles gambiae OX=7165 GN=TRYP7 PE=2 SV=2	INVnr_XP_001864433.1_trypsin_5_[Culex_quinquefasciatus]
CPIJ019765	CYP9M14: cytochrome P450 9M14	8.49988	-2.17819	0.520423	-4.18542	2.85e-05	0.000181938		cytochrome P450	CP9E2_BLAGECytochrome P450 9e2 OS=Blattella germanica OX=6973 GN=CYP9E2 PE=2 SV=1	INVnr_XP_001869970.1_cytochrome_P450_9c1_[Culex_quinquefasciatus]
CPIJ015785	transferrin precursor	58.4219	-2.18333	0.506423	-4.31128	1.62e-05	0.000110359		transferrin precursor	TRF_SARPETransferrin OS=Sarcophaga peregrina OX=7386 PE=1 SV=1	INVnr_XP_001865858.1_transferrin_[Culex_quinquefasciatus]
CPIJ006721	CYP4H37: cytochrome P450 4H37	371.679	-2.18579	0.14843	-14.7261	4.38e-49	1.63e-46		cytochrome P450 4V3	CP4D2_DROMECytochrome P450 4d2 OS=Drosophila melanogaster OX=7227 GN=Cyp4d2 PE=2 SV=2	INVnr_XP_001849096.1_cytochrome_P450_4V3_[Culex_quinquefasciatus]
CPIJ003119	conserved hypothetical protein	5.63222	-2.18693	0.580794	-3.76541	0.000166275	0.000854297		dual oxidase maturation factor 1	DOXA1_HUMANDual oxidase maturation factor 1 OS=Homo sapiens OX=9606 GN=DUOXA1 PE=1 SV=1	INVnr_XP_001844505.1_conserved_hypothetical_protein_[Culex_quinquefasciatus]
CPIJ004251	myelin proteolipid	29.2051	-2.18737	0.360477	-6.068	1.3e-09	2.08e-08		myelin proteolipid	GPM6B_MOUSENeuronal membrane glyco M6-b OS=Mus musculus OX=10090 GN=Gpm6b PE=1 SV=2	INVnr_XP_001845831.1_myelin_proteolipid_[Culex_quinquefasciatus]
CPIJ007311	conserved hypothetical protein	384.135	-2.18826	0.154914	-14.1256	2.64e-45	8.09e-43	cqu00480	conserved hypothetical protein	OPLA_RAT5-oxoprolinase OS=Rattus norvegicus OX=10116 GN=Oplah PE=1 SV=2	INVnr_XP_001848679.1_conserved_hypothetical_protein_[Culex_quinquefasciatus]
CPIJ008523	serine-type enodpeptidase, putative	5.83462	-2.20621	0.583231	-3.78274	0.000155109	0.000806341		serine protease SP24D	SP24D_ANOGASerine protease SP24D OS=Anopheles gambiae OX=7165 GN=Sp24D PE=2 SV=3	INVnr_XP_001850312.1_serine-type_enodpeptidase,_partial_[Culex_quinquefasciatus]
CPIJ007783	arylphorin subunit alpha precursor	28.1348	-2.20829	0.646618	-3.41514	0.000637487	0.00278219		arylphorin subunit alpha	HEXA_ANOGAHexamerin- OS=Anopheles gambiae OX=7165 GN= PE=2 SV=2	INVnr_XP_001849286.1_arylphorin_subunit_alpha_[Culex_quinquefasciatus]
CPIJ008654	phosphatidylethanolamine-binding protein	3.52846	-2.22518	0.63078	-3.52766	0.000419249	0.00193272		phosphatidylethanolamine-binding protein	PEBPH_CAEELPhosphatidylethanolamine-binding homolog OS=Caenorhabditis elegans OX=6239 GN= PE=3 SV=1	INVnr_XP_001850222.1_phosphatidylethanolamine-binding_protein_[Culex_quinquefasciatus]
CPIJ006684	predicted protein	45.1092	-2.22727	0.296613	-7.50902	5.96e-14	1.85e-12		zinc finger	---NA---	INVnr_XP_001848242.1_predicted_protein_[Culex_quinquefasciatus]
CPIJ009622	conserved hypothetical protein	46.7894	-2.23715	0.290131	-7.71081	1.25e-14	4.17e-13	cqu04150	TELO2-interacting 1 homolog	TTI1_HUMANTELO2-interacting 1 homolog OS=Homo sapiens OX=9606 GN=TTI1 PE=1 SV=3	INVnr_XP_001850928.1_conserved_hypothetical_protein_[Culex_quinquefasciatus]
CPIJ012146	ribose-phosphate pyrophosphokinase 1,2	4.60593	-2.24141	0.603314	-3.71516	0.000203075	0.00101885		phosphoribosyl pyrophosphate synthase-associated 2 isoform X2	KPRB_CHICKPhosphoribosyl pyrophosphate synthase-associated 2 OS=Gallus gallus OX=9031 GN=PRPSAP2 PE=2 SV=1	INVnr_XP_001862760.1_ribose-phosphate_pyrophosphokinase_1,2_[Culex_quinquefasciatus]
CPIJ011200	aggrecan core protein precursor	5.86345	-2.28662	0.579858	-3.94341	8.03e-05	0.000452679		aggrecan core	---NA---	INVnr_XP_001870990.1_aggrecan_core_protein_[Culex_quinquefasciatus]
CPIJ008363	DNA replication licensing factor MCM1	7.04923	-2.30252	0.55234	-4.16867	3.06e-05	0.000193905		DNA replication licensing factor MCM1	MCM9_XENTRDNA helicase MCM9 OS=Xenopus tropicalis OX=8364 GN=mcm9 PE=3 SV=1	INVnr_XP_001849859.1_DNA_replication_licensing_factor_MCM1_[Culex_quinquefasciatus]
CPIJ012055	sodium/shloride dependent amino acid transporter, putative	31.3289	-2.31135	0.352142	-6.5637	5.25e-11	1.04e-09		sodium Chloride dependent amino acid transporter	NAAT1_DROANSodium-dependent nutrient amino acid transporter 1 OS=Drosophila ananassae OX=7217 GN=NAAT1 PE=3 SV=1	INVnr_XP_001862434.1_sodium/Chloride_dependent_amino_acid_transporter_[Culex_quinquefasciatus]
CPIJ006152	conserved hypothetical protein	11.6997	-2.31483	0.479671	-4.82586	1.39e-06	1.2e-05		conserved hypothetical protein	---NA---	INVnr_XP_001847596.1_conserved_hypothetical_protein_[Culex_quinquefasciatus]
CPIJ010345	conserved hypothetical protein	9.47243	-2.31757	0.512949	-4.51813	6.24e-06	4.66e-05		zinc finger 275	ZN574_MOUSEZinc finger 574 OS=Mus musculus OX=10090 GN=Znf574 PE=1 SV=1	INVnr_XP_001870985.1_conserved_hypothetical_protein_[Culex_quinquefasciatus]
CPIJ009976	conserved hypothetical protein	38.0525	-2.32299	0.314836	-7.3784	1.6e-13	4.64e-12		cation-dependent mannose-6-phosphate receptor	---NA---	INVnr_XP_001853201.1_conserved_hypothetical_protein_[Culex_quinquefasciatus]
CPIJ015701	32 kDa beta-galactoside-binding lectin lec-3	27.3266	-2.32835	0.361018	-6.4494	1.12e-10	2.1e-09		32 kDa beta-galactoside-binding lectin lec-3	LEG4_MOUSEGalectin-4 OS=Mus musculus OX=10090 GN=Lgals4 PE=1 SV=2	INVnr_XP_001865727.1_32_kDa_beta-galactoside-binding_lectin_lec-3_[Culex_quinquefasciatus]
CPIJ004956	conserved hypothetical protein	97.1254	-2.33851	0.231981	-10.0806	6.73e-24	6.08e-22		---NA---	---NA---	INVnr_XP_001846477.1_conserved_hypothetical_protein_[Culex_quinquefasciatus]
CPIJ000426	acetyl-coenzyme A synthetase	69.6449	-2.3419	0.253787	-9.22783	2.76e-20	1.8e-18		acetyl-coenzyme A synthetase	ACSF2_MACFAAcyl- synthetase family member mitochondrial OS=Macaca fascicularis OX=9541 GN=ACSF2 PE=2 SV=1	INVnr_XP_001842096.1_acetyl-coenzyme_A_synthetase_[Culex_quinquefasciatus]
CPIJ011725	conserved hypothetical protein	575.346	-2.37432	0.178138	-13.3285	1.58e-40	3.97e-38		cAMP-responsive element-binding -like 2	CRBL2_RA -responsive element-binding -like 2 OS=Rattus norvegicus OX=10116 GN=Crebl2 PE=2 SV=1	INVnr_XP_001862082.1_conserved_hypothetical_protein_[Culex_quinquefasciatus]
CPIJ006774	arylsulfatase B precursor	11.4686	-2.38544	0.499518	-4.77549	1.79e-06	1.51e-05		arylsulfatase B	ARSB_MOUSEArylsulfatase B OS=Mus musculus OX=10090 GN=Arsb PE=1 SV=3	INVnr_XP_001848165.1_arylsulfatase_B_[Culex_quinquefasciatus]
CPIJ018287	DNA polymerase delta catalytic subunit	42.5744	-2.4024	0.304571	-7.88781	3.08e-15	1.11e-13	cqu00230,cqu00240,cqu01100,cqu03030,cqu03410,cqu03420,cqu03430,cqu03440	DNA polymerase delta catalytic subunit	DPOD1_DROMEDNA polymerase delta catalytic subunit OS=Drosophila melanogaster OX=7227 GN=DNApol-delta PE=2 SV=2	INVnr_XP_001868453.1_DNA_polymerase_delta_catalytic_subunit_[Culex_quinquefasciatus]
CPIJ009147	serine/threonine-protein kinase chk2	4.40741	-2.51604	0.619336	-4.06247	4.86e-05	0.000291831		ovarian-specific serine threonine- kinase Lok isoform X1	LOK_DROMEOvarian-specific serine threonine- kinase Lok OS=Drosophila melanogaster OX=7227 GN=lok PE=2 SV=1	INVnr_XP_001850809.1_serine/threonine-protein_kinase_chk2_[Culex_quinquefasciatus]
CPIJ017305	sterol desaturase	9.9762	-2.54824	0.523232	-4.87018	1.11e-06	9.8e-06	cqu00100,cqu01100	sterol desaturase	FXDC2_MACFAFatty acid hydroxylase domain-containing 2 OS=Macaca fascicularis OX=9541 GN=FAXDC2 PE=2 SV=1	INVnr_XP_001867830.1_sterol_desaturase_[Culex_quinquefasciatus]
CPIJ003226	actin	7.7989	-2.61597	0.562407	-4.65138	3.3e-06	2.6e-05		ARP5_AEDAE ame: Full=Actin-related 5	ARP5_AEDAEActin-related 5 OS=Aedes aegypti OX=7159 GN=Arp5 PE=3 SV=1	INVnr_XP_001844597.1_actin_[Culex_quinquefasciatus]
CPIJ005091	DNA replication licensing factor MCM8	13.6072	-2.65569	0.486415	-5.45973	4.77e-08	5.6e-07		DNA replication licensing factor MCM8	MCM8_RATDNA helicase MCM8 OS=Rattus norvegicus OX=10116 GN=Mcm8 PE=3 SV=1	INVnr_XP_001846901.1_DNA_replication_licensing_factor_MCM8_[Culex_quinquefasciatus]
CPIJ013861	hypothetical protein	3.57236	-2.65842	0.642398	-4.13827	3.5e-05	0.000218524		hypothetical protein CpipJ_CPIJ013861	---NA---	INVnr_XP_001864453.1_hypothetical_protein_CpipJ_CPIJ013861_[Culex_quinquefasciatus]
CPIJ000427	AMP dependent coa ligase, putative	158.453	-2.66065	0.203882	-13.05	6.36e-39	1.36e-36		AMP dependent coa ligase	ACSF2_DANREAcyl- synthetase family member mitochondrial OS=Danio rerio OX=7955 GN=acsf2 PE=2 SV=1	INVnr_XP_001842097.1_AMP_dependent_coa_ligase_[Culex_quinquefasciatus]
CPIJ010394	PET191 polypeptide, putative	3.58915	-2.68235	0.641675	-4.18024	2.91e-05	0.0001853		PET191 polypeptide	COA5_BOVINCytochrome c oxidase assembly factor 5 OS=Bos taurus OX=9913 GN=COA5 PE=3 SV=1	INVnr_XP_001870890.1_PET191_polypeptide_[Culex_quinquefasciatus]
CPIJ018865	conserved hypothetical protein	12.2753	-2.69895	0.497323	-5.42697	5.73e-08	6.61e-07		dentin sialophospho isoform X2	3BP5L_MOUSESH3 domain-binding 5-like OS=Mus musculus OX=10090 GN=Sh3bp5l PE=1 SV=1	INVnr_XP_001869284.1_conserved_hypothetical_protein_[Culex_quinquefasciatus]
CPIJ010185	ras association domain protein, putative	3.98826	-2.78133	0.638548	-4.35571	1.33e-05	9.25e-05		ras association domain	RASF2_RATRas association domain-containing 2 OS=Rattus norvegicus OX=10116 GN=Rassf2 PE=2 SV=1	INVnr_XP_001870719.1_ras_association_domain_protein_[Culex_quinquefasciatus]
CPIJ003458	conserved hypothetical protein	5.78576	-2.82808	0.608116	-4.65056	3.31e-06	2.61e-05		conserved hypothetical protein	---NA---	INVnr_XP_001845098.1_conserved_hypothetical_protein_[Culex_quinquefasciatus]
CPIJ012895	LRIM3: leucine-rich immune protein (Long)	4.57354	-2.91092	0.634813	-4.58547	4.53e-06	3.48e-05		leucine-rich repeat transmembrane neuronal 2	LRRT2_MOUSELeucine-rich repeat transmembrane neuronal 2 OS=Mus musculus OX=10090 GN=Lrrtm2 PE=2 SV=1	INVnr_XP_001863106.1_leucine-rich_repeat_transmembrane_neuronal_protein_2_[Culex_quinquefasciatus]
CPIJ000496	conserved hypothetical protein	3967.61	-2.91496	0.294766	-9.88905	4.64e-23	3.89e-21		conserved hypothetical protein	---NA---	INVnr_XP_001842166.1_conserved_hypothetical_protein_[Culex_quinquefasciatus]
CPIJ010618	pyrazinamidase/nicotinamidase	38.7955	-2.95886	0.345706	-8.55889	1.14e-17	5.46e-16		pyrazinamidase nicotinamidase	PNCA_ECOLINicotinamidase OS=Escherichia coli (strain K12) OX=83333 GN=pncA PE=1 SV=1	INVnr_XP_001859965.1_pyrazinamidase/nicotinamidase_[Culex_quinquefasciatus]
CPIJ000495	conserved hypothetical protein	889.787	-2.96784	0.163561	-18.1451	1.4e-73	1.65e-70		conserved hypothetical protein	---NA---	INVnr_XP_001842165.1_conserved_hypothetical_protein_[Culex_quinquefasciatus]
CPIJ000494	conserved hypothetical protein	3289.03	-2.9746	0.149184	-19.9391	1.86e-88	2.63e-85		conserved hypothetical protein	---NA---	INVnr_XP_001842164.1_conserved_hypothetical_protein_[Culex_quinquefasciatus]
CPIJ019787	ficolin-3 precursor	5.13783	-3.02504	0.630936	-4.79453	1.63e-06	1.39e-05		fibrinogen and fibronectin	ANGP2_RATAngiopoietin-2 OS=Rattus norvegicus OX=10116 GN=Angpt2 PE=2 SV=2	INVnr_XP_001870012.1_ficolin-3_[Culex_quinquefasciatus]
CPIJ004795	mitochondrial carrier protein, putative	58.1246	-3.03996	0.301871	-10.0704	7.47e-24	6.66e-22		mitochondrial carrier	RIM2_DROMEMitochondrial carrier Rim2 OS=Drosophila melanogaster OX=7227 GN=Rim2 PE=2 SV=2	INVnr_XP_001846405.1_mitochondrial_carrier_protein_[Culex_quinquefasciatus]
CPIJ000056	larval serum protein 1 beta chain precursor	30.4906	-3.04572	0.6536	-4.65991	3.16e-06	2.51e-05		larval serum 1 beta chain	HEXA_ANOGAHexamerin- OS=Anopheles gambiae OX=7165 GN= PE=2 SV=2	INVnr_XP_001841726.1_larval_serum_protein_1_beta_chain_[Culex_quinquefasciatus]
CPIJ010470	conserved hypothetical protein	5.4852	-3.1141	0.628323	-4.9562	7.19e-07	6.61e-06		transmembrane 19 isoform X1	---NA---	INVnr_XP_001854851.1_conserved_hypothetical_protein_[Culex_quinquefasciatus]
CPIJ009033	arylphorin subunit C223 precursor	206.033	-3.12831	0.63524	-4.92462	8.45e-07	7.68e-06		arylphorin subunit C223	HEXA_ANOGAHexamerin- OS=Anopheles gambiae OX=7165 GN= PE=2 SV=2	INVnr_XP_001850701.1_arylphorin_subunit_C223_[Culex_quinquefasciatus]
CPIJ013538	ficolin-1 precursor	5.7216	-3.14177	0.62695	-5.01119	5.41e-07	5.11e-06		fibrinogen and fibronectin	FCN1_PIGFicolin-1 OS=Sus scrofa OX=9823 GN=FCN1 PE=1 SV=1	INVnr_XP_001864229.1_ficolin-1_[Culex_quinquefasciatus]
CPIJ018811	disulfide oxidoreductase	5.63239	-3.14812	0.626151	-5.02774	4.96e-07	4.72e-06		apoptosis-inducing factor mitochondrial	AIFM1_MOUSEApoptosis-inducing factor mitochondrial OS=Mus musculus OX=10090 GN=Aifm1 PE=1 SV=1	INVnr_XP_001869122.1_disulfide_oxidoreductase_[Culex_quinquefasciatus]
CPIJ007000	hypothetical protein	5.66845	-3.15382	0.625873	-5.03908	4.68e-07	4.48e-06		matrix metallo ase	---NA---	INVnr_XP_001866366.1_conserved_hypothetical_protein_[Culex_quinquefasciatus]
CPIJ010133	structural maintenance of chromosomes smc2	9.65693	-3.17856	0.564683	-5.62893	1.81e-08	2.38e-07		structural maintenance of chromosomes 2	SMC2_XENLAStructural maintenance of chromosomes 2 OS=Xenopus laevis OX=8355 GN=smc2 PE=1 SV=1	INVnr_XP_001851491.1_structural_maintenance_of_chromosomes_smc2_[Culex_quinquefasciatus]
CPIJ011720	dipeptidyl-peptidase	5.75432	-3.18223	0.624613	-5.09472	3.49e-07	3.44e-06		prolyl endopeptidase FAP	VDDP4_VESVUVenom dipeptidyl peptidase 4 OS=Vespula vulgaris OX=7454 PE=1 SV=1	INVnr_XP_001862077.1_dipeptidyl-peptidase_[Culex_quinquefasciatus]
CPIJ015649	DNA-binding protein smubp-2, putative	6.96662	-3.38431	0.617463	-5.48099	4.23e-08	5.04e-07		DNA-binding smubp-2	M10B1_DANRE helicase mov-10- OS=Danio rerio OX=7955 GN= PE=2 SV=2	INVnr_XP_001865948.1_DNA-binding_protein_smubp-2_[Culex_quinquefasciatus]
CPIJ019303	transcription termination factor 2	7.28192	-3.44737	0.614883	-5.60654	2.06e-08	2.66e-07		transcription termination factor 2	TTF2_DROMETranscription termination factor 2 OS=Drosophila melanogaster OX=7227 GN=lds PE=1 SV=2	INVnr_XP_001869656.1_transcription_termination_factor_2_[Culex_quinquefasciatus]
CPIJ014743	GTP-binding protein-invertebrate	46.6505	-3.70786	0.380215	-9.752	1.81e-22	1.46e-20	cqu03008	GTP-binding -invertebrate	GNL3_DROMEGuanine nucleotide-binding -like 3 homolog OS=Drosophila melanogaster OX=7227 GN=Ns1 PE=1 SV=2	INVnr_XP_001865335.1_GTP-binding_protein-invertebrate_[Culex_quinquefasciatus]
CPIJ004489	potassium-dependent sodium-calcium exchanger, putative	67.6807	-3.75077	0.359867	-10.4227	1.95e-25	2.05e-23		potassium-dependent sodium-calcium exchanger	NCKX5_HUMANSodium potassium calcium exchanger 5 OS=Homo sapiens OX=9606 GN=SLC24A5 PE=1 SV=1	INVnr_XP_001846075.1_potassium-dependent_sodium-calcium_exchanger_[Culex_quinquefasciatus]
CPIJ002522	serine 3-dehydrogenase	15.2407	-3.76296	0.542636	-6.93459	4.07e-12	9.41e-11		farnesol dehydrogenase-like	SDR1_AEDAEFarnesol dehydrogenase OS=Aedes aegypti OX=7159 GN=SDR-1 PE=1 SV=2	INVnr_XP_001844191.1_serine_3-dehydrogenase_[Culex_quinquefasciatus]
CPIJ013708	conserved hypothetical protein	13.8333	-3.82536	0.573166	-6.6741	2.49e-11	5.18e-10		conserved hypothetical protein	---NA---	INVnr_XP_001864374.1_conserved_hypothetical_protein_[Culex_quinquefasciatus]	Farnesoic acid 0-methyl transferase
CPIJ014195	conserved hypothetical protein	38.2076	-4.1011	0.628176	-6.52859	6.64e-11	1.29e-09		conserved hypothetical protein	---NA---	INVnr_XP_001864224.1_conserved_hypothetical_protein_[Culex_quinquefasciatus]	Chitin binding protein
CPIJ006306	ion channel nompc	17.8941	-4.20188	0.554289	-7.58067	3.44e-14	1.1e-12		ion channel nompc	PYX_DROMETransient receptor potential channel pyrexia OS=Drosophila melanogaster OX=7227 GN=pyx PE=2 SV=2	INVnr_XP_001848012.1_ion_channel_nompc_[Culex_quinquefasciatus]
CPIJ014172	2-hydroxyacyl-CoA lyase 1	45.894	-5.3288	0.521406	-10.2201	1.61e-24	1.56e-22	cqu04146	2-hydroxyacyl- lyase 1	HACL1_HUMAN2-hydroxyacyl- lyase 1 OS=Homo sapiens OX=9606 GN=HACL1 PE=1 SV=2	INVnr_XP_001864201.1_2-hydroxyacyl-CoA_lyase_1_[Culex_quinquefasciatus]
