# Supplementary material for: A differential transcriptional profile by Culex quinquefasciatus larvae resistant to Lysinibacillus sphaericus IAB59 highlights genes and pathways associated with the resistance phenotype
Source: Parasit Vectors. 2019 Aug 20;12:407. doi: 10.1186/s13071-019-3661-y (PMC6702717; doi:10.1186/s13071-019-3661-y)
Supplement: Supplementary file 4 — Additional file 4: Table S3. Description of STRING clusters found for downregulated and upregulated genes of Culex quinquefasciatus larvae from a Lysinibacillus sphaericus resistant colony (RIAB59) compared to a susceptible colony. [file 13071_2019_3661_MOESM4_ESM.xls]

## Sheet: down-regulated
Additional file 4: Table S3. Description of eight STRING clusters found for downregulated genes of Culex quinquefasciatus larvae from a Lysinibacillus sphaericus resistant colony (RIAB59) compared to a susceptible colony.
X_mclCluster	Gene id	Annotation	blast2go_nr_annotation	blast2go_uniprot_annotation	blast_nr_annotation
1. Wd-repeat repeat spliceosome	CPIJ015560-PA	Nudix hydrolase 3	nudix hydrolase 3	NUDT8_MOUSENucleoside diphosphate-linked moiety X motif 8 OS=Mus musculus OX=10090 GN=Nudt8 PE=1 SV=1	INVnr_XP_001865984.1_nudix_hydrolase_3_[Culex_quinquefasciatus]
(169 genes)	CPIJ003331-PA	Conserved hypothetical protein	OPA3 CG13603 isoform X1	OPA32_DROME OPA3 CG13603 OS=Drosophila melanogaster OX=7227 GN=CG13601 PE=2 SV=1	INVnr_XP_001845057.1_conserved_hypothetical_protein_[Culex_quinquefasciatus]
	CPIJ006316-PA	Conserved hypothetical protein	interferon-related developmental regulator 2-like	IFRD1_MOUSEInterferon-related developmental regulator 1 OS=Mus musculus OX=10090 GN=Ifrd1 PE=1 SV=2	INVnr_XP_001848022.1_conserved_hypothetical_protein_[Culex_quinquefasciatus]
	CPIJ003888-PA	Conserved hypothetical protein	serine arginine repetitive matrix 2 isoform X1	PPRC1_MOUSEPeroxisome proliferator-activated receptor gamma coactivator-related 1 OS=Mus musculus OX=10090 GN=Pprc1 PE=1 SV=1	INVnr_XP_001845556.1_conserved_hypothetical_protein_[Culex_quinquefasciatus]
	CPIJ011915-PA	Multisynthetase complex, auxiliary protein, p38, putative	probable aminoacyl tRNA synthase complex-interacting multifunctional 2 isoform X2	AIMP2_DROMEProbable aminoacyl tRNA synthase complex-interacting multifunctional 2 OS=Drosophila melanogaster OX=7227 GN=AIMP2 PE=3 SV=1	INVnr_XP_001862128.1_multisynthetase_complex,_auxiliary_protein,_p38_[Culex_quinquefasciatus]
	CPIJ002956-PA	Sugar transporter	sugar transporter	TRET1_DROVIFacilitated trehalose transporter Tret1 OS=Drosophila virilis OX=7244 GN=Tret1 PE=3 SV=2	INVnr_XP_001844574.1_sugar_transporter_[Culex_quinquefasciatus]
	CPIJ002957-PA	Sugar transporter	sugar transporter	TRET1_BOMMOFacilitated trehalose transporter Tret1 OS=Bombyx mori OX=7091 GN=Tret1 PE=1 SV=1	INVnr_XP_001844575.1_sugar_transporter_[Culex_quinquefasciatus]
	CPIJ000191-PA	Sugar transporter	facilitated trehalose transporter Tret1-like	TRET1_CULQUFacilitated trehalose transporter Tret1 OS=Culex quinquefasciatus OX=7176 GN=Tret1 PE=3 SV=1	INVnr_XP_001841956.1_sugar_transporter_[Culex_quinquefasciatus]
	CPIJ802260-PA	ATP synthase mitochondrial F1 complex assembly factor 2	NA	NA	NA
	CPIJ012633-PA	Conserved hypothetical protein	conserved hypothetical protein	REF2P_DROME ref(2)P OS=Drosophila melanogaster OX=7227 GN=ref(2)P PE=1 SV=2	INVnr_XP_001862557.1_conserved_hypothetical_protein_[Culex_quinquefasciatus]
	CPIJ009818-PA	Heat shock protein	heat shock	HSPB1_BOVINHeat shock beta-1 OS=Bos taurus OX=9913 GN=HSPB1 PE=2 SV=1	INVnr_XP_001870766.1_heat_shock_protein_[Culex_quinquefasciatus]
	CPIJ005644-PA	Protein lethal(2)essential for life	lethal(2)essential for life	L2EFL_DROME lethal(2)essential for life OS=Drosophila melanogaster OX=7227 GN=l(2)efl PE=1 SV=1	INVnr_XP_001847193.1_lethal(2)essential_for_life_[Culex_quinquefasciatus]
	CPIJ005643-PA	Protein lethal(2)essential for life	lethal(2)essential for life	L2EFL_DROME lethal(2)essential for life OS=Drosophila melanogaster OX=7227 GN=l(2)efl PE=1 SV=1	INVnr_XP_001847192.1_lethal(2)essential_for_life_[Culex_quinquefasciatus]
	CPIJ010526-PA	cysteinyl-tRNA synthetase	cysteinyl-tRNA synthetase	SYCC_DROPSCysteine--tRNA cytoplasmic OS=Drosophila pseudoobscura pseudoobscura OX=46245 GN=Aats-cys PE=3 SV=1	INVnr_XP_001855148.1_cysteinyl-tRNA_synthetase_[Culex_quinquefasciatus]
	CPIJ007481-PA	SET and MYND domain-containing protein 5	SET and MYND domain-containing 5	SMYD5_XENLASET and MYND domain-containing 5 OS=Xenopus laevis OX=8355 GN=smyd5 PE=2 SV=1	INVnr_XP_001848651.1_SET_and_MYND_domain-containing_protein_5_[Culex_quinquefasciatus]
	CPIJ012653-PA	Septin	septin-4	SEPT4_MOUSESeptin-4 OS=Mus musculus OX=10090 GN=Sept4 PE=1 SV=1	INVnr_XP_001862952.1_septin_[Culex_quinquefasciatus]
	CPIJ005730-PA	Conserved hypothetical protein	conserved hypothetical protein	XBP1_BOVINX-box-binding 1 OS=Bos taurus OX=9913 GN=XBP1 PE=2 SV=1	INVnr_XP_001847153.1_conserved_hypothetical_protein_[Culex_quinquefasciatus]
	CPIJ013804-PA	Hypothetical protein	NADH dehydrogenase [ubiquinone] 1 alpha subcomplex subunit 7	NDUA7_MOUSENADH dehydrogenase	INVnr_XP_001863783.1_hypothetical_protein_CpipJ_CPIJ013804_[Culex_quinquefasciatus]
	CPIJ000119-PA	Kelch domain-containing protein 4	kelch domain-containing 4	KLDC4_MOUSEKelch domain-containing 4 OS=Mus musculus OX=10090 GN=Klhdc4 PE=2 SV=2	INVnr_XP_001841789.1_kelch_domain-containing_protein_4_[Culex_quinquefasciatus]
	CPIJ015622-PA	Dynein light chain 1, cytoplasmic-like protein	dynein light chain cytoplasmic isoform X2	DYL1_DROMEDynein light chain cytoplasmic OS=Drosophila melanogaster OX=7227 GN=ctp PE=1 SV=1	INVnr_XP_001865724.1_dynein_light_chain_1,_cytoplasmic-like_protein_[Culex_quinquefasciatus]
	CPIJ020069-PA	Methionine aminopeptidase 2	methionine aminopeptidase 2	MAP2_MOUSEMethionine aminopeptidase 2 OS=Mus musculus OX=10090 GN=Metap2 PE=1 SV=1	INVnr_XP_001870451.1_methionine_aminopeptidase_2_[Culex_quinquefasciatus]
	CPIJ010271-PA	Conserved hypothetical protein	zinc finger 622-like	ZN622_HUMANZinc finger 622 OS=Homo sapiens OX=9606 GN=ZNF622 PE=1 SV=1	INVnr_XP_001870854.1_conserved_hypothetical_protein_[Culex_quinquefasciatus]
	CPIJ008800-PA	ATP-dependent protease La	ATP-dependent protease La	LONM_DROMELon protease mitochondrial OS=Drosophila melanogaster OX=7227 GN=Lon PE=1 SV=1	INVnr_XP_001850455.1_ATP-dependent_protease_La_[Culex_quinquefasciatus]
	CPIJ008799-PA	ATP-dependent Lon protease, putative	ATP-dependent Lon protease	LONM_DROMELon protease mitochondrial OS=Drosophila melanogaster OX=7227 GN=Lon PE=1 SV=1	INVnr_XP_001850454.1_ATP-dependent_Lon_protease_[Culex_quinquefasciatus]
	CPIJ003279-PA	tryptophanyl-tRNA synthetase	tryptophanyl-tRNA synthetase	SYWC_HUMANTryptophan--tRNA cytoplasmic OS=Homo sapiens OX=9606 GN=WARS PE=1 SV=2	INVnr_XP_001845005.1_tryptophanyl-tRNA_synthetase_[Culex_quinquefasciatus]
	CPIJ003835-PA	Conserved hypothetical protein	microsomal triglyceride transfer large subunit	MTP_BOVINMicrosomal triglyceride transfer large subunit (Fragment) OS=Bos taurus OX=9913 GN=MTTP PE=1 SV=1	INVnr_XP_001845472.1_conserved_hypothetical_protein_[Culex_quinquefasciatus]
	CPIJ009942-PA	Density-regulated protein	density-regulated homolog	DENR_DROMEDensity-regulated homolog OS=Drosophila melanogaster OX=7227 GN=DENR PE=1 SV=3	INVnr_XP_001870739.1_density-regulated_protein_[Culex_quinquefasciatus]
	CPIJ013498-PA	Sui1	translation factor SUI1 homolog	ETIF1_ANOGAEukaryotic translation initiation factor eIF1 OS=Anopheles gambiae OX=7165 GN=eIF1 PE=3 SV=1	INVnr_XP_001863733.1_sui1_[Culex_quinquefasciatus]
	CPIJ005646-PA	alphaA-crystallin, putative	lethal(2)essential for life	L2EFL_DROME lethal(2)essential for life OS=Drosophila melanogaster OX=7227 GN=l(2)efl PE=1 SV=1	INVnr_XP_001847195.1_alphaA-crystallin_[Culex_quinquefasciatus]
	CPIJ005645-PA	Heat shock protein 22	lethal(2)essential for life	L2EFL_DROME lethal(2)essential for life OS=Drosophila melanogaster OX=7227 GN=l(2)efl PE=1 SV=1	INVnr_XP_001847194.1_heat_shock_protein_22_[Culex_quinquefasciatus]
	CPIJ009186-PA	Complement component	complement component	C1QBP_BOVINComplement component 1 Q subcomponent-binding mitochondrial OS=Bos taurus OX=9913 GN=C1QBP PE=2 SV=1	INVnr_XP_001850674.1_complement_component_[Culex_quinquefasciatus]
	CPIJ012226-PA	Augmenter of liver regeneration	augmenter of liver regeneration	ALR_MOUSEFAD-linked sulfhydryl oxidase ALR OS=Mus musculus OX=10090 GN=Gfer PE=1 SV=2	INVnr_XP_001862367.1_augmenter_of_liver_regeneration_[Culex_quinquefasciatus]
	CPIJ002679-PA	Glutathione S-transferase theta-2	glutathione S-transferase theta-2	GSTT1_MUSDOGlutathione S-transferase 1 OS=Musca domestica OX=7370 GN=Gst1 PE=2 SV=1	INVnr_XP_001844262.1_glutathione_S-transferase_theta-2_[Culex_quinquefasciatus]
	CPIJ002675-PA	Glutathione S-transferase 1	glutathione S-transferase 1	GSTT1_MUSDOGlutathione S-transferase 1 OS=Musca domestica OX=7370 GN=Gst1 PE=2 SV=1	INVnr_XP_001844258.1_glutathione_S-transferase_1_[Culex_quinquefasciatus]
	CPIJ018627-PA	Glutathione S-transferase 1-1	glutathione S-transferase epsilon 2	GSTT1_MANSEGlutathione S-transferase 1 OS=Manduca sexta OX=7130 GN=GST1 PE=2 SV=1	INVnr_XP_001868770.1_glutathione_S-transferase_1-1_[Culex_quinquefasciatus]
	CPIJ002678-PA	Glutathione transferase I	glutathione transferase I	GSTT1_MUSDOGlutathione S-transferase 1 OS=Musca domestica OX=7370 GN=Gst1 PE=2 SV=1	INVnr_XP_001844261.1_glutathione_transferase_I_[Culex_quinquefasciatus]
	CPIJ018624-PA	Glutathione-s-transferase theta, gst	glutathione-s-transferase gst	GSTT1_MANSEGlutathione S-transferase 1 OS=Manduca sexta OX=7130 GN=GST1 PE=2 SV=1	INVnr_XP_001868767.1_glutathione-s-transferase_theta,_gst_[Culex_quinquefasciatus]
	CPIJ018626-PA	Glutathione-s-transferase theta, gst	glutathione-s-transferase gst	GSTT1_MANSEGlutathione S-transferase 1 OS=Manduca sexta OX=7130 GN=GST1 PE=2 SV=1	INVnr_XP_001868769.1_glutathione-s-transferase_theta,_gst_[Culex_quinquefasciatus]
	CPIJ014577-PA	Phosphoglycerate mutase 2	phosphoglycerate mutase 2	PGAM2_HUMANPhosphoglycerate mutase 2 OS=Homo sapiens OX=9606 GN=PGAM2 PE=1 SV=3	INVnr_XP_001864878.1_phosphoglycerate_mutase_2_[Culex_quinquefasciatus]
	CPIJ015971-PA	26S proteasome non-ATPase regulatory subunit 11	26S proteasome non-ATPase regulatory subunit 11	PSD11_DROME26S proteasome non-ATPase regulatory subunit 11 OS=Drosophila melanogaster OX=7227 GN=Rpn6 PE=1 SV=1	INVnr_XP_001866360.1_26S_proteasome_non-ATPase_regulatory_subunit_11_[Culex_quinquefasciatus]
	CPIJ001272-PA	Leucine-rich transmembrane protein	trophoblast glyco	LRRC3_BOVINLeucine-rich repeat-containing 3 OS=Bos taurus OX=9913 GN=LRRC3 PE=2 SV=1	INVnr_XP_001842941.1_leucine-rich_transmembrane_protein_[Culex_quinquefasciatus]
	CPIJ014953-PA	Membrane glycoprotein LIG-1, putative	toll-like receptor 6 isoform X1	NISCH_RATNischarin OS=Rattus norvegicus OX=10116 GN=Nisch PE=2 SV=2	INVnr_XP_001865846.1_membrane_glycoprotein_LIG-1_[Culex_quinquefasciatus]
	CPIJ801432-PA	Conserved hypothetical protein	NA	NA	NA
	CPIJ016258-PA	Probable ER retained protein	probable ER retained	SDF2_MOUSEStromal cell-derived factor 2 OS=Mus musculus OX=10090 GN=Sdf2 PE=1 SV=1	INVnr_XP_001866801.1_probable_ER_retained_protein_[Culex_quinquefasciatus]
	CPIJ019233-PA	Cerebral protein 1	cerebral 1	RRP8_DROMERibosomal RNA-processing 8 OS=Drosophila melanogaster OX=7227 GN=CG7137 PE=1 SV=1	INVnr_XP_001869661.1_cerebral_protein_1_[Culex_quinquefasciatus]
	CPIJ016638-PA	Glycine cleavage system h protein	glycine cleavage system h	GCSH_DROMEGlycine cleavage system H mitochondrial OS=Drosophila melanogaster OX=7227 GN=ppl PE=2 SV=1	INVnr_XP_001866806.1_glycine_cleavage_system_h_protein_[Culex_quinquefasciatus]
	CPIJ802238-PA	Cabut	NA	NA	NA
	CPIJ016789-PA	Zinc finger protein	zinc finger	ZN271_MOUSEZinc finger 271 OS=Mus musculus OX=10090 GN=Znf271 PE=2 SV=1	INVnr_XP_001866945.1_zinc_finger_protein_[Culex_quinquefasciatus]
	CPIJ007339-PA	RNA-binding protein 8A	RNA-binding 8A	RBM8A_DROMERNA-binding 8A OS=Drosophila melanogaster OX=7227 GN=tsu PE=1 SV=1	INVnr_XP_001849141.1_RNA-binding_protein_8A_[Culex_quinquefasciatus]
	CPIJ006569-PA	Glutaminase	glutaminase kidney mitochondrial-like isoform X3	GLSK_RATGlutaminase kidney mitochondrial OS=Rattus norvegicus OX=10116 GN=Gls PE=1 SV=2	INVnr_XP_001848066.1_glutaminase_[Culex_quinquefasciatus]
	CPIJ007693-PA	Conserved hypothetical protein	ER with RDEL retention signal	SEELE_DROME seele OS=Drosophila melanogaster OX=7227 GN=sel PE=1 SV=1	INVnr_XP_001849587.1_conserved_hypothetical_protein_[Culex_quinquefasciatus]
	CPIJ006912-PA	Maggie	mitochondrial import receptor subunit TOM22 homolog isoform X2	TOM22_MACFAMitochondrial import receptor subunit TOM22 homolog OS=Macaca fascicularis OX=9541 GN=TOMM22 PE=2 SV=3	INVnr_XP_001848517.1_maggie_[Culex_quinquefasciatus]
	CPIJ802402-PA	Lupus la ribonucleoprotein, putative	NA	NA	NA
	CPIJ001131-PA	Erythrocyte band 7 integral membrane protein	stomatin mitochondrial	STML2_MOUSEStomatin mitochondrial OS=Mus musculus OX=10090 GN=Stoml2 PE=1 SV=1	INVnr_XP_001842800.1_erythrocyte_band_7_integral_membrane_protein_[Culex_quinquefasciatus]
	CPIJ002809-PA	Conserved hypothetical protein	BAG domain-containing Samui	BAGS_BOMMOBAG domain-containing Samui OS=Bombyx mori OX=7091 GN=Samui PE=2 SV=1	INVnr_XP_001844965.1_conserved_hypothetical_protein_[Culex_quinquefasciatus]
	CPIJ002063-PA	Mitochondrial ribosomal protein L42	39S ribosomal mitochondrial	RM42_PONAB39S ribosomal mitochondrial OS=Pongo abelii OX=9601 GN=MRPL42 PE=2 SV=1	INVnr_XP_001843331.1_mitochondrial_ribosomal_protein_L42_[Culex_quinquefasciatus]
	CPIJ014691-PA	FK506-binding protein 59	FK506-binding 59	FKB59_DROMEFK506-binding 59 OS=Drosophila melanogaster OX=7227 GN=FKBP59 PE=1 SV=1	INVnr_XP_001865043.1_FK506-binding_protein_59_[Culex_quinquefasciatus]
	CPIJ003580-PA	Cle7, putative	UPF0568 C14orf166	RTRAF_PONABRNA translation and transport factor OS=Pongo abelii OX=9601 GN=RTRAF PE=2 SV=1	INVnr_XP_001845248.1_cle7_[Culex_quinquefasciatus]
	CPIJ005012-PA	Conserved hypothetical protein	conserved hypothetical protein	FA98B_MOUSE FAM98B OS=Mus musculus OX=10090 GN=Fam98b PE=1 SV=1	INVnr_XP_001846653.1_conserved_hypothetical_protein_[Culex_quinquefasciatus]
	CPIJ018157-PA	Exosome complex exonuclease RRP46	---NA---	EXOS5_HUMANExosome complex component RRP46 OS=Homo sapiens OX=9606 GN=EXOSC5 PE=1 SV=1	INVnr_XP_001868566.1_exosome_complex_exonuclease_RRP46_[Culex_quinquefasciatus]
	CPIJ007943-PA	Peroxiredoxin 5, prdx5	peroxiredoxin prdx5	PRDX5_HUMANPeroxiredoxin- mitochondrial OS=Homo sapiens OX=9606 GN=PRDX5 PE=1 SV=4	INVnr_XP_001849745.1_peroxiredoxin_5,_prdx5_[Culex_quinquefasciatus]
	CPIJ013743-PA	Integrin beta-1-binding protein 2	integrin beta-1-binding 2	CHRD1_DROMECysteine and histidine-rich domain-containing OS=Drosophila melanogaster OX=7227 GN=CHORD PE=1 SV=1	INVnr_XP_001864518.1_integrin_beta-1-binding_protein_2_[Culex_quinquefasciatus]
	CPIJ003897-PA	Transmembrane protein, putative	thioredoxin domain-containing	TXND_THEPAThioredoxin domain-containing OS=Theileria parva OX=5875 GN=TP02_0602 PE=1 SV=1	INVnr_XP_001845565.1_transmembrane_protein_[Culex_quinquefasciatus]
	CPIJ010586-PA	Transcription elongation factor SPT4	transcription elongation factor SPT4	SPT4H_DROMETranscription elongation factor SPT4 OS=Drosophila melanogaster OX=7227 GN=spt4 PE=1 SV=1	INVnr_XP_001870822.1_transcription_elongation_factor_SPT4_[Culex_quinquefasciatus]
	CPIJ018241-PA	Microsomal glutathione S-transferase 1	microsomal glutathione S-transferase 1-like	MGST1_MOUSEMicrosomal glutathione S-transferase 1 OS=Mus musculus OX=10090 GN=Mgst1 PE=1 SV=3	INVnr_XP_001868657.1_microsomal_glutathione_S-transferase_1_[Culex_quinquefasciatus]
	CPIJ002918-PA	Eukaryotic translation initiation factor 4 gamma	eukaryotic translation initiation factor 4 gamma 2	IF4G2_PONABEukaryotic translation initiation factor 4 gamma 2 OS=Pongo abelii OX=9601 GN=EIF4G2 PE=2 SV=2	INVnr_XP_001844536.1_eukaryotic_translation_initiation_factor_4_gamma_[Culex_quinquefasciatus]
	CPIJ004849-PA	Eukaryotic translation initiation factor 4 gamma	eukaryotic translation initiation factor 4 gamma	IF4G3_MOUSEEukaryotic translation initiation factor 4 gamma 3 OS=Mus musculus OX=10090 GN=Eif4g3 PE=1 SV=2	INVnr_XP_001846498.1_eukaryotic_translation_initiation_factor_4_gamma_[Culex_quinquefasciatus]
	CPIJ011578-PA	Mitochondrial ribosomal protein L30	mitochondrial ribosomal L30	RM30_BOVIN39S ribosomal mitochondrial OS=Bos taurus OX=9913 GN=MRPL30 PE=1 SV=1	INVnr_XP_001862205.1_mitochondrial_ribosomal_protein_L30_[Culex_quinquefasciatus]
	CPIJ007629-PA	Splicing factor, putative	splicing factor	IF4H_PONABEukaryotic translation initiation factor 4H OS=Pongo abelii OX=9601 GN=EIF4H PE=2 SV=1	INVnr_XP_001848859.1_splicing_factor_[Culex_quinquefasciatus]
	CPIJ012670-PA	Nucleotide exchange factor SIL1 precursor	nucleotide exchange factor SIL1	SIL1_DROMENucleotide exchange factor SIL1 OS=Drosophila melanogaster OX=7227 GN=CG10420 PE=2 SV=1	INVnr_XP_001862933.1_nucleotide_exchange_factor_SIL1_[Culex_quinquefasciatus]
	CPIJ008983-PA	ATP-dependent RNA helicase DBP8	probable ATP-dependent RNA helicase Dbp45A	DDX49_DROMEProbable ATP-dependent RNA helicase Dbp45A OS=Drosophila melanogaster OX=7227 GN=Dbp45A PE=2 SV=2	INVnr_XP_001850610.1_ATP-dependent_RNA_helicase_DBP8_[Culex_quinquefasciatus]
	CPIJ007255-PA	Cytidylate kinase	UMP-CMP kinase	KCY_XENTRUMP-CMP kinase OS=Xenopus tropicalis OX=8364 GN=cmpk1 PE=2 SV=2	INVnr_XP_001848791.1_cytidylate_kinase_[Culex_quinquefasciatus]
	EIF6	Translation initiation factor	NA	NA	NA
	CPIJ012513-PA	Tetratricopeptide repeat protein 4	tetratricopeptide repeat 4	TTC4_HUMANTetratricopeptide repeat 4 OS=Homo sapiens OX=9606 GN=TTC4 PE=1 SV=3	INVnr_XP_001862488.1_tetratricopeptide_repeat_protein_4_[Culex_quinquefasciatus]
	CPIJ018211-PA	Mitochondrial inner membrane protein translocase, 13kD-subunit, putative	mitochondrial import inner membrane translocase subunit Tim13	TIM13_DROMEMitochondrial import inner membrane translocase subunit Tim13 OS=Drosophila melanogaster OX=7227 GN=Tim13 PE=3 SV=1	INVnr_XP_001868540.1_mitochondrial_inner_membrane_protein_translocase,_13kD-subunit_[Culex_quinquefasciatus]
	CPIJ018687-PA	Mitochondrial import inner membrane translocase subunit Tim9	mitochondrial import inner membrane translocase subunit Tim9	TIM9_DROMEMitochondrial import inner membrane translocase subunit Tim9 OS=Drosophila melanogaster OX=7227 GN=Tim9a PE=3 SV=1	INVnr_XP_001868839.1_mitochondrial_import_inner_membrane_translocase_subunit_Tim9_[Culex_quinquefasciatus]
	CPIJ011366-PA	Mitochondrial ribosomal protein S31	mitochondrial ribosomal S31	RT31_HUMAN28S ribosomal mitochondrial OS=Homo sapiens OX=9606 GN=MRPS31 PE=1 SV=3	INVnr_XP_001861604.1_mitochondrial_ribosomal_protein_S31_[Culex_quinquefasciatus]
	CPIJ802450-PA	Gamma glutamyl transpeptidases	NA	NA	NA
	CPIJ005886-PA	Polyribonucleotide nucleotidyltransferase 1, mitochondrial precursor	polyribonucleotide nucleotidyltransferase mitochondrial	PNPT1_PONABPolyribonucleotide nucleotidyltransferase mitochondrial OS=Pongo abelii OX=9601 GN=PNPT1 PE=2 SV=2	INVnr_XP_001847711.1_polyribonucleotide_nucleotidyltransferase_1,_mitochondrial_[Culex_quinquefasciatus]
	CPIJ001564-PA	Selenide	water dikinase	water dikinase OS=Drosophila melanogaster OX=7227 GN= PE=2 SV=1	INVnr_XP_001843048.1_selenide_[Culex_quinquefasciatus]
	CPIJ005552-PA	Thioredoxin reductase 1, mitochondrial precursor	thioredoxin reductase mitochondrial	TRXR1_DROMEThioredoxin reductase mitochondrial OS=Drosophila melanogaster OX=7227 GN=Trxr-1 PE=1 SV=2	INVnr_XP_001847793.1_thioredoxin_reductase_1,_mitochondrial_[Culex_quinquefasciatus]
	CPIJ009423-PA	WD repeat protein	WD repeat	NLE_DROME Notchless OS=Drosophila melanogaster OX=7227 GN=Nle PE=1 SV=2	INVnr_XP_001851092.1_WD_repeat_protein_[Culex_quinquefasciatus]
	CPIJ009679-PA	Peroxiredoxin-2	peroxiredoxin-2	PRDX3_PONABThioredoxin-dependent peroxide mitochondrial OS=Pongo abelii OX=9601 GN=PRDX3 PE=2 SV=1	INVnr_XP_001852614.1_peroxiredoxin-2_[Culex_quinquefasciatus]
	CPIJ003399-PA	Peroxiredoxins, prx-1, prx-2, prx-3	peroxiredoxin 1	PRDX1_DROMEPeroxiredoxin 1 OS=Drosophila melanogaster OX=7227 GN=Jafrac1 PE=1 SV=1	INVnr_XP_001844844.1_peroxiredoxins,_prx-1,_prx-2,_prx-3_[Culex_quinquefasciatus]
	CPIJ009003-PA	Conserved hypothetical protein	sulfiredoxin isoform X3	SRX_DROME sulfiredoxin OS=Drosophila melanogaster OX=7227 GN=CG6762 PE=2 SV=1	INVnr_XP_001850565.1_conserved_hypothetical_protein_[Culex_quinquefasciatus]
	CPIJ000031-PA	Glutathione S-transferase	glutathione S-transferase	SEPIA_DROMEPyrimidodiazepine synthase OS=Drosophila melanogaster OX=7227 GN=se PE=1 SV=1	INVnr_XP_001841701.1_glutathione_S-transferase_[Culex_quinquefasciatus]
	CPIJ014054-PA	Glutathione S-transferase theta-1	glutathione S-transferase theta-1	GSTT3_MOUSEGlutathione S-transferase theta-3 OS=Mus musculus OX=10090 GN=Gstt3 PE=1 SV=1	INVnr_XP_001864152.1_glutathione_S-transferase_theta-1_[Culex_quinquefasciatus]
	CPIJ007376-PA	Calreticulin	calreticulin	CALR_DROMECalreticulin OS=Drosophila melanogaster OX=7227 GN=Calr PE=1 SV=2	INVnr_XP_001848824.1_calreticulin_[Culex_quinquefasciatus]
	CPIJ006509-PA	Tetratricopeptide repeat protein, putative	Bardet-Biedl syndrome 4 homolog	BBS4_DROMEBardet-Biedl syndrome 4 homolog OS=Drosophila melanogaster OX=7227 GN=BBS4 PE=3 SV=1	INVnr_XP_001848193.1_tetratricopeptide_repeat_protein_[Culex_quinquefasciatus]
	CPIJ006734-PA	DNA-directed RNA polymerase II 16 kDa polypeptide	DNA-directed RNA polymerase II 16 kDa polypeptide isoform X2	RPB4_DROMEDNA-directed RNA polymerase II subunit Rpb4 OS=Drosophila melanogaster OX=7227 GN=Rpb4 PE=2 SV=5	INVnr_XP_001849109.1_DNA-directed_RNA_polymerase_II_16_kDa_polypeptide_[Culex_quinquefasciatus]
	CPIJ008858-PA	Conserved hypothetical protein	conserved hypothetical protein	LCP_STRK3Rubber oxygenase OS=Streptomyces (strain K30) OX=256642 GN=lcp PE=1 SV=2	INVnr_XP_001850776.1_conserved_hypothetical_protein_[Culex_quinquefasciatus]
	CPIJ016781-PA	Conserved hypothetical protein	H ACA ribonucleo complex non-core subunit NAF1	NAF1_DROMEH ACA ribonucleo complex non-core subunit NAF1 OS=Drosophila melanogaster OX=7227 GN=CG10341 PE=1 SV=2	INVnr_XP_001867727.1_conserved_hypothetical_protein_[Culex_quinquefasciatus]
	CPIJ018848-PA	Mitochondrial protein import protein MAS5	mitochondrial import MAS5	DNAJ1_DROME homolog 1 OS=Drosophila melanogaster OX=7227 GN= -1 PE=1 SV=3	INVnr_XP_001869188.1_mitochondrial_protein_import_protein_MAS5_[Culex_quinquefasciatus]
	CPIJ009657-PA	Conserved hypothetical protein	serine protease	NOP16_TETNGNucleolar 16 OS=Tetraodon nigroviridis OX=99883 GN=nop16 PE=3 SV=1	INVnr_XP_001851355.1_conserved_hypothetical_protein_[Culex_quinquefasciatus]
	CPIJ008190-PA	39S ribosomal protein L14, mitochondrial precursor	39S ribosomal mitochondrial	RM14_DANRE39S ribosomal mitochondrial OS=Danio rerio OX=7955 GN=mrpl14 PE=2 SV=1	INVnr_XP_001849440.1_39S_ribosomal_protein_L14,_mitochondrial_[Culex_quinquefasciatus]
	CPIJ000729-PA	Mitochondrial ribosomal protein, L17, putative	mitochondrial ribosomal L17	RM18_MOUSE39S ribosomal mitochondrial OS=Mus musculus OX=10090 GN=Mrpl18 PE=1 SV=1	INVnr_XP_001842294.1_mitochondrial_ribosomal_protein,_L17_[Culex_quinquefasciatus]
	CPIJ009389-PA	P21-activated protein kinase-interacting protein 1	p21-activated kinase-interacting 1-like	PK1IP_XENLAp21-activated kinase-interacting 1-like OS=Xenopus laevis OX=8355 GN=pak1ip1 PE=2 SV=1	INVnr_XP_001850983.1_p21-activated_protein_kinase-interacting_protein_1_[Culex_quinquefasciatus]
	CPIJ009793-PA	Glioma tumor suppressor candidate region gene 2 protein	glioma tumor suppressor candidate region gene 2	NOP53_DROMERibosome biogenesis NOP53 OS=Drosophila melanogaster OX=7227 GN=CG1785 PE=2 SV=1	INVnr_XP_001851341.1_glioma_tumor_suppressor_candidate_region_gene_2_protein_[Culex_quinquefasciatus]
	CPIJ005219-PA	Protein disulfide isomerase	disulfide isomerase	PDI_DROME disulfide-isomerase OS=Drosophila melanogaster OX=7227 GN=Pdi PE=2 SV=1	INVnr_XP_001847538.1_disulfide_isomerase_[Culex_quinquefasciatus]
	CPIJ007327-PA	Protein disulfide-isomerase A6 precursor	disulfide-isomerase A6 homolog	PDIA6_DROME disulfide-isomerase A6 homolog OS=Drosophila melanogaster OX=7227 GN= 1 PE=1 SV=1	INVnr_XP_001848695.1_disulfide-isomerase_A6_[Culex_quinquefasciatus]
	CPIJ008583-PA	DnaJ domain containing protein	domain containing	TIM14_DROMEMitochondrial import inner membrane translocase subunit TIM14 OS=Drosophila melanogaster OX=7227 GN=Tim14 PE=3 SV=2	INVnr_XP_001850179.1_DnaJ_domain_containing_protein_[Culex_quinquefasciatus]
	CPIJ004081-PA	Protein Peter pan	Peter pan	PPAN_DROME Peter pan OS=Drosophila melanogaster OX=7227 GN=ppan PE=1 SV=1	INVnr_XP_001845711.1_Peter_pan_[Culex_quinquefasciatus]
	CPIJ018609-PA	Mitochondrial import inner membrane translocase subunit tim44	mitochondrial import inner membrane translocase subunit tim44	TIM44_MOUSEMitochondrial import inner membrane translocase subunit TIM44 OS=Mus musculus OX=10090 GN=Timm44 PE=1 SV=2	INVnr_XP_001868783.1_mitochondrial_import_inner_membrane_translocase_subunit_tim44_[Culex_quinquefasciatus]
	CPIJ801790-PA	DEAD box ATP-dependent RNA helicase	NA	NA	NA
	CPIJ802116-PA	Protein AFG2	NA	NA	NA
	CPIJ802431-PA	DNA-J/hsp40	NA	NA	NA
	CPIJ003898-PA	Mitochondrial import inner membrane translocase subunit Tim17-A	mitochondrial import inner membrane translocase subunit Tim17-A	TI17B_HUMANMitochondrial import inner membrane translocase subunit Tim17-B OS=Homo sapiens OX=9606 GN=TIMM17B PE=1 SV=1	INVnr_XP_001845566.1_mitochondrial_import_inner_membrane_translocase_subunit_Tim17-A_[Culex_quinquefasciatus]
	CPIJ010413-PA	Mitochondrial import inner membrane translocase subunit Tim23	mitochondrial import inner membrane translocase subunit Tim23	TIM23_PONABMitochondrial import inner membrane translocase subunit Tim23 OS=Pongo abelii OX=9601 GN=TIMM23 PE=2 SV=1	INVnr_XP_001870925.1_mitochondrial_import_inner_membrane_translocase_subunit_Tim23_[Culex_quinquefasciatus]
	CPIJ003204-PA	DNAJ chaperone	DNAJ chaperone	DNJA1_HUMAN homolog subfamily A member 1 OS=Homo sapiens OX=9606 GN=DNAJA1 PE=1 SV=2	INVnr_XP_001844792.1_DNAJ_chaperone_[Culex_quinquefasciatus]
	CPIJ801577-PA	Mitosis protein dim1	NA	NA	NA
	CPIJ003174-PA	Ubiquitin fusion degradation protein 2	ubiquitin fusion degradation 2	RNF37_HUMANRING finger 37 OS=Homo sapiens OX=9606 GN=UBOX5 PE=1 SV=1	INVnr_XP_001844762.1_ubiquitin_fusion_degradation_protein_2_[Culex_quinquefasciatus]
	CPIJ011081-PA	Heat shock protein 70 B2	heat shock 70 B2	HSP74_ANOALHeat shock 70 B2 OS=Anopheles albimanus OX=7167 GN=HSP70B2 PE=3 SV=1	INVnr_XP_001861437.1_heat_shock_protein_70_B2_[Culex_quinquefasciatus]
	CPIJ011083-PA	Heat shock protein 70 B2	heat shock 70 B2	HSP74_ANOALHeat shock 70 B2 OS=Anopheles albimanus OX=7167 GN=HSP70B2 PE=3 SV=1	INVnr_XP_001861438.1_heat_shock_protein_70_B2_[Culex_quinquefasciatus]
	CPIJ008915-PA	Heat shock 70 kDa protein cognate 4	heat shock 70 kDa cognate 4	HSP7D_DROMEHeat shock 70 kDa cognate 4 OS=Drosophila melanogaster OX=7227 GN=Hsc70-4 PE=1 SV=3	INVnr_XP_001850527.1_heat_shock_70_kDa_protein_cognate_4_[Culex_quinquefasciatus]
	CPIJ003123-PA	DNA-directed RNA polymerase I 40 kDa polypeptide	DNA-directed RNA polymerase I 40 kDa polypeptide	RPAC1_BOVINDNA-directed RNA polymerases I and III subunit RPAC1 OS=Bos taurus OX=9913 GN=POLR1C PE=2 SV=1	INVnr_XP_001844509.1_DNA-directed_RNA_polymerase_I_40_kDa_polypeptide_[Culex_quinquefasciatus]
	CPIJ015639-PA	39S ribosomal protein L21, mitochondrial precursor	39S ribosomal mitochondrial	RM21_BOVIN39S ribosomal mitochondrial OS=Bos taurus OX=9913 GN=MRPL21 PE=1 SV=1	INVnr_XP_001865900.1_39S_ribosomal_protein_L21,_mitochondrial_[Culex_quinquefasciatus]
	CPIJ011247-PA	Heat shock protein 82	heat shock 82	HSP83_DROMIHeat shock 83 (Fragment) OS=Drosophila miranda OX=7229 GN=Hsp83 PE=3 SV=1	INVnr_XP_001861929.1_heat_shock_protein_82_[Culex_quinquefasciatus]
	CPIJ009822-PA	DNA-directed RNA polymerase III subunit C	DNA-directed RNA polymerase III subunit C	RPC3_HUMANDNA-directed RNA polymerase III subunit RPC3 OS=Homo sapiens OX=9606 GN=POLR3C PE=1 SV=1	INVnr_XP_001851545.1_DNA-directed_RNA_polymerase_III_subunit_C_[Culex_quinquefasciatus]
	CPIJ015892-PA	DNA-directed RNA polymerases III 12.5 kDa polypeptide	DNA-directed RNA polymeraseIII kDa polypeptide	RPC10_HUMANDNA-directed RNA polymerase III subunit RPC10 OS=Homo sapiens OX=9606 GN=POLR3K PE=1 SV=2	INVnr_XP_001866125.1_DNA-directed_RNA_polymeraseIII_12.5_kDa_polypeptide_[Culex_quinquefasciatus]
	CPIJ801575-PA	Protein l(2)37Cc	NA	NA	NA
	CPIJ000981-PA	Prohibitin-2	prohibitin-2 isoform X4	PHB2_MOUSEProhibitin-2 OS=Mus musculus OX=10090 GN=Phb2 PE=1 SV=1	INVnr_XP_001842651.1_prohibitin-2_[Culex_quinquefasciatus]
	CPIJ801571-PA	Protein l(2)37Cc	NA	NA	NA
	CPIJ015157-PA	Lsm6 protein; Associated with the spliceosome snRNP U1, U2, U4/U6 and U5	U6 snRNA-associated Sm LSm6	LSM6_MOUSEU6 snRNA-associated Sm LSm6 OS=Mus musculus OX=10090 GN=Lsm6 PE=1 SV=1	INVnr_XP_013112899.1_PREDICTED:_U6_snRNA-associated_Sm-like_protein_LSm6_[Stomoxys_calcitrans]
	CPIJ018539-PA	Wd-repeat protein	periodic tryptophan 1 homolog	PWP1_BOVINPeriodic tryptophan 1 homolog OS=Bos taurus OX=9913 GN=PWP1 PE=2 SV=1	INVnr_XP_001868901.1_wd-repeat_protein_[Culex_quinquefasciatus]
	CPIJ006616-PA	Small nuclear ribonucleoprotein-associated protein B	small nuclear ribonucleo -associated B	RSMB_DROMESmall nuclear ribonucleo -associated B OS=Drosophila melanogaster OX=7227 GN= PE=1 SV=1	INVnr_XP_001848091.1_small_nuclear_ribonucleoprotein-associated_protein_B_[Culex_quinquefasciatus]
	CPIJ019868-PA	Heat shock 70 kDa protein 4	heat shock 70 kDa 4	HSP74_HUMANHeat shock 70 kDa 4 OS=Homo sapiens OX=9606 GN=HSPA4 PE=1 SV=4	INVnr_XP_001870146.1_heat_shock_70_kDa_protein_4_[Culex_quinquefasciatus]
	CPIJ007987-PA	ATP-dependent RNA helicase DRS1	probable ATP-dependent RNA helicase DDX27	DDX27_HUMANProbable ATP-dependent RNA helicase DDX27 OS=Homo sapiens OX=9606 GN=DDX27 PE=1 SV=2	INVnr_XP_001849941.1_ATP-dependent_RNA_helicase_DRS1_[Culex_quinquefasciatus]
	CPIJ011261-PA	Cell cycle control protein cwf8	cell cycle control cwf8	PRP19_HUMANPre-mRNA-processing factor 19 OS=Homo sapiens OX=9606 GN=PRPF19 PE=1 SV=1	INVnr_XP_001861543.1_cell_cycle_control_protein_cwf8_[Culex_quinquefasciatus]
	CPIJ012850-PA	Splicing factor u2af large subunit	splicing factor u2af large subunit	U2AF2_DROMESplicing factor U2AF 50 kDa subunit OS=Drosophila melanogaster OX=7227 GN=U2af50 PE=1 SV=1	INVnr_XP_001863087.1_splicing_factor_u2af_large_subunit_[Culex_quinquefasciatus]
	CPIJ006169-PA	WD repeat protein 74	WD repeat 74	WDR74_BOVINWD repeat-containing 74 OS=Bos taurus OX=9913 GN=WDR74 PE=2 SV=1	INVnr_XP_001847613.1_WD_repeat_protein_74_[Culex_quinquefasciatus]
	CPIJ002854-PA	U3 small nucleolar RNA-associated protein 15	U3 small nucleolar RNA-associated 15 homolog	UTP15_RATU3 small nucleolar RNA-associated 15 homolog OS=Rattus norvegicus OX=10116 GN=Utp15 PE=2 SV=1	INVnr_XP_001844385.1_U3_small_nucleolar_RNA-associated_protein_15_[Culex_quinquefasciatus]
	CPIJ016072-PA	SEC63 protein, putative	translocation SEC63 homolog	SEC63_PONABTranslocation SEC63 homolog OS=Pongo abelii OX=9601 GN=SEC63 PE=2 SV=1	INVnr_XP_001867124.1_SEC63_protein_[Culex_quinquefasciatus]
	CPIJ801431-PA	13 kDa ribonucleoprotein-associated protein	NA	NA	NA
	CPIJ010003-PA	T-complex protein 1 subunit gamma	T-complex 1 subunit gamma	TCPG_DROMET-complex 1 subunit gamma OS=Drosophila melanogaster OX=7227 GN=CCT3 PE=2 SV=2	INVnr_XP_001870703.1_T-complex_protein_1_subunit_gamma_[Culex_quinquefasciatus]
	CPIJ008191-PA	Protein grpE	grpE mitochondrial	GRPE_DROME mitochondrial OS=Drosophila melanogaster OX=7227 GN=Roe1 PE=2 SV=2	INVnr_XP_001849441.1_grpE_[Culex_quinquefasciatus]
	CPIJ015075-PA	Heat shock protein 83	heat shock 83	HSP83_ANOGAHeat shock 83 OS=Anopheles gambiae OX=7165 GN=Hsp83 PE=3 SV=3	INVnr_XP_001865484.1_heat_shock_protein_83_[Culex_quinquefasciatus]
	CPIJ801643-PA	U3 small nucleolar ribonucleoprotein protein MPP10	NA	NA	NA
	CPIJ005330-PA	60S ribosome subunit biogenesis protein NIP7	60S ribosome subunit biogenesis NIP7	NIP7_TETNG60S ribosome subunit biogenesis NIP7 homolog OS=Tetraodon nigroviridis OX=99883 GN=nip7 PE=3 SV=1	INVnr_XP_001846772.1_60S_ribosome_subunit_biogenesis_protein_NIP7_[Culex_quinquefasciatus]
	CPIJ012840-PA	39S ribosomal protein L24, mitochondrial precursor	39S ribosomal mitochondrial	RM24_DROMEProbable 39S ribosomal mitochondrial OS=Drosophila melanogaster OX=7227 GN=m 24 PE=2 SV=1	INVnr_XP_001842014.1_39S_ribosomal_protein_L24,_mitochondrial_[Culex_quinquefasciatus]
	CPIJ002384-PA	Endoplasmin precursor	endoplasmin	ENPL_BOVINEndoplasmin OS=Bos taurus OX=9913 GN=HSP90B1 PE=2 SV=1	INVnr_XP_001844128.1_endoplasmin_[Culex_quinquefasciatus]
	CPIJ003550-PA	78 kDa glucose-regulated protein precursor	heat shock 70 kDa cognate 3	BIP_DROMEEndoplasmic reticulum chaperone OS=Drosophila melanogaster OX=7227 GN=Hsc70-3 PE=1 SV=2	INVnr_XP_001845218.1_78_kDa_glucose-regulated_protein_[Culex_quinquefasciatus]
	CPIJ011585-PA	Glutamate-cysteine ligase	glutamate--cysteine ligase	GSH1_DROMEGlutamate--cysteine ligase OS=Drosophila melanogaster OX=7227 GN=Gclc PE=2 SV=1	INVnr_XP_001862212.1_glutamate-cysteine_ligase_[Culex_quinquefasciatus]
	CPIJ012503-PA	Gamma-glutamylcysteine synthetase, putative	glutamate--cysteine ligase regulatory subunit	GSH0_RATGlutamate--cysteine ligase regulatory subunit OS=Rattus norvegicus OX=10116 GN=Gclm PE=1 SV=1	INVnr_XP_001862478.1_gamma-glutamylcysteine_synthetase_[Culex_quinquefasciatus]
	CPIJ013588-PA	Mitochondrial 28S ribosomal protein S2	28S ribosomal mitochondrial	RT02_BOVIN28S ribosomal mitochondrial OS=Bos taurus OX=9913 GN=MRPS2 PE=1 SV=2	INVnr_XP_001863960.1_mitochondrial_28S_ribosomal_protein_S2_[Culex_quinquefasciatus]
	CPIJ005675-PA	NBP2b protein, putative	surfeit locus 6 homolog	SURF6_DROMESurfeit locus 6 homolog OS=Drosophila melanogaster OX=7227 GN=Surf6 PE=1 SV=1	INVnr_XP_001847224.1_NBP2b_protein_[Culex_quinquefasciatus]
	CPIJ014363-PA	Rrp15 protein	RRP15 isoform X2	RRP15_DROPSRRP15 OS=Drosophila pseudoobscura pseudoobscura OX=46245 GN=GA17706 PE=3 SV=1	INVnr_XP_001864631.1_Rrp15_protein_[Culex_quinquefasciatus]
	CPIJ005010-PA	Fibrillarin	rRNA 2 -O-methyltransferase fibrillarin	FBRL_DROM 2 -O-methyltransferase fibrillarin OS=Drosophila melanogaster OX=7227 GN=Fib PE=2 SV=1	INVnr_XP_001846651.1_fibrillarin_[Culex_quinquefasciatus]
	CPIJ007556-PA	Regulator of ribosome biosynthesis	ribosome biogenesis regulatory homolog	RRS1_HUMANRibosome biogenesis regulatory homolog OS=Homo sapiens OX=9606 GN=RRS1 PE=1 SV=2	INVnr_XP_001849672.1_regulator_of_ribosome_biosynthesis_[Culex_quinquefasciatus]
	CPIJ008588-PA	mRNA turnover protein 4	mRNA turnover 4	MRT4_MOUS turnover 4 homolog OS=Mus musculus OX=10090 GN=Mrto4 PE=1 SV=1	INVnr_XP_001850330.1_mRNA_turnover_protein_4_[Culex_quinquefasciatus]
	CPIJ013673-PA	39S ribosomal protein L11, mitochondrial precursor	39S ribosomal mitochondrial	RM11_DROME39S ribosomal mitochondrial OS=Drosophila melanogaster OX=7227 GN=m 11 PE=1 SV=1	INVnr_XP_001863766.1_39S_ribosomal_protein_L11,_mitochondrial_[Culex_quinquefasciatus]
	CPIJ004454-PA	Conserved hypothetical protein	heat shock 70 kDa cognate 5	HSP7E_DROMEHeat shock 70 kDa cognate 5 OS=Drosophila melanogaster OX=7227 GN=Hsc70-5 PE=1 SV=2	INVnr_XP_001846040.1_conserved_hypothetical_protein_[Culex_quinquefasciatus]
	CPIJ008935-PA	39S ribosomal protein L17, mitochondrial precursor	39S ribosomal mitochondrial	RM17_HUMAN39S ribosomal mitochondrial OS=Homo sapiens OX=9606 GN=MRPL17 PE=1 SV=1	INVnr_XP_001851021.1_39S_ribosomal_protein_L17,_mitochondrial_[Culex_quinquefasciatus]
	CPIJ017840-PA	39S ribosomal protein L12, mitochondrial precursor	50S ribosomal L7 L12	RM12_BOVIN39S ribosomal mitochondrial OS=Bos taurus OX=9913 GN=MRPL12 PE=1 SV=1	INVnr_XP_001867980.1_39S_ribosomal_protein_L12,_mitochondrial_[Culex_quinquefasciatus]
	CPIJ009916-PA	Brix domain-containing protein 2	brix domain-containing 2	BRX1_DROMERibosome biogenesis BRX1 homolog OS=Drosophila melanogaster OX=7227 GN=CG11583 PE=2 SV=2	INVnr_XP_001862861.1_brix_domain-containing_protein_2_[Culex_quinquefasciatus]
	CPIJ008199-PA	Conserved hypothetical protein	conserved hypothetical protein	DAF41_CAEELCo-chaperone daf-41 OS=Caenorhabditis elegans OX=6239 GN=daf-41 PE=2 SV=1	INVnr_XP_001849449.1_conserved_hypothetical_protein_[Culex_quinquefasciatus]
	CPIJ012888-PA	rRNA processing protein Ebp2	rRNA processing Ebp2	EBP2_DROMEProbable rRNA-processing EBP2 homolog OS=Drosophila melanogaster OX=7227 GN=CG1542 PE=2 SV=1	INVnr_XP_001863228.1_rRNA_processing_protein_Ebp2_[Culex_quinquefasciatus]
	CPIJ015549-PA	Ribosomal biogenesis protein Gar2	ribosomal biogenesis Gar2	MK67I_DANREMKI67 FHA domain-interacting nucleolar phospho OS=Danio rerio OX=7955 GN=nifk PE=2 SV=2	INVnr_XP_001865709.1_ribosomal_biogenesis_protein_Gar2_[Culex_quinquefasciatus]
	CPIJ000795-PA	H/ACA ribonucleoprotein complex subunit 4	H ACA ribonucleo complex subunit 4	DKC1_DROMEH ACA ribonucleo complex subunit 4 OS=Drosophila melanogaster OX=7227 GN=Nop60B PE=1 SV=1	INVnr_XP_001842601.1_H/ACA_ribonucleoprotein_complex_subunit_4_[Culex_quinquefasciatus]
	CPIJ005033-PA	Nucleolar protein NHP2	H ACA ribonucleo complex subunit 2	NHP2_DROMEH ACA ribonucleo complex subunit 2 OS=Drosophila melanogaster OX=7227 GN=NHP2 PE=1 SV=1	INVnr_XP_001846874.1_nucleolar_protein_NHP2_[Culex_quinquefasciatus]
	CPIJ019794-PA	Prov protein, putative	Tetratricopeptide repeat	DNJC3_CHICK homolog subfamily C member 3 OS=Gallus gallus OX=9031 GN=DNAJC3 PE=2 SV=1	INVnr_XP_001870072.1_prov_protein_[Culex_quinquefasciatus]
	CPIJ011244-PA	Heat shock protein 83	heat shock 83	HSP83_ANOGAHeat shock 83 OS=Anopheles gambiae OX=7165 GN=Hsp83 PE=3 SV=3	INVnr_XP_001861926.1_heat_shock_protein_83_[Culex_quinquefasciatus]
	CPIJ003678-PA	U3 small nucleolar ribonucleoprotein protein IMP4	U3 small nucleolar ribonucleo IMP4	IMP4_RATU3 small nucleolar ribonucleo IMP4 OS=Rattus norvegicus OX=10116 GN=Imp4 PE=2 SV=1	INVnr_XP_001845456.1_U3_small_nucleolar_ribonucleoprotein_protein_IMP4_[Culex_quinquefasciatus]
	CPIJ017520-PA	U3 small nucleolar ribonucleoprotein protein IMP3	U3 small nucleolar ribonucleo IMP3	IMP3_MOUSEU3 small nucleolar ribonucleo IMP3 OS=Mus musculus OX=10090 GN=Imp3 PE=2 SV=1	INVnr_XP_001867852.1_U3_small_nucleolar_ribonucleoprotein_protein_IMP3_[Culex_quinquefasciatus]
	CPIJ007196-PA	Conserved hypothetical protein	hypoxia up-regulated 1	HYOU1_DANREHypoxia up-regulated 1 OS=Danio rerio OX=7955 GN=hyou1 PE=2 SV=1	INVnr_XP_001849302.1_conserved_hypothetical_protein_[Culex_quinquefasciatus]
	CPIJ017844-PA	Tetratricopeptide repeat protein, putative	Tetratricopeptide repeat	DNJC3_CHICK homolog subfamily C member 3 OS=Gallus gallus OX=9031 GN=DNAJC3 PE=2 SV=1	INVnr_XP_001868052.1_Tetratricopeptide_repeat_protein_[Culex_quinquefasciatus]
	CPIJ007228-PA	Heat shock protein, putative	heat shock	CH10_SCHJA10 kDa heat shock mitochondrial OS=Schistosoma japonicum OX=6182 GN=SJCHGC01960 PE=3 SV=2	INVnr_XP_001848951.1_heat_shock_protein_[Culex_quinquefasciatus]
	CPIJ008889-PA	60 kDa heat shock protein, mitochondrial precursor	60 kDa heat shock mitochondrial	CH60A_DROMEHeat shock 60A OS=Drosophila melanogaster OX=7227 GN=Hsp60A PE=1 SV=3	INVnr_XP_001850501.1_60_kDa_heat_shock_protein,_mitochondrial_[Culex_quinquefasciatus]
	CPIJ010925-PA	Heat shock protein 70	heat shock 70	STIP1_BOVINStress-induced-phospho 1 OS=Bos taurus OX=9913 GN=STIP1 PE=2 SV=1	INVnr_XP_001857580.1_heat_shock_protein_70_[Culex_quinquefasciatus]
	CPIJ011246-PA	Heat shock protein 83	heat shock 83	HSP83_ANOGAHeat shock 83 OS=Anopheles gambiae OX=7165 GN=Hsp83 PE=3 SV=3	INVnr_XP_001861928.1_heat_shock_protein_83_[Culex_quinquefasciatus]
2. Cytochrome P450 71 b3	CPIJ016922-PA	Serine 3-dehydrogenase	serine 3-dehydrogenase	SDR1_AEDAEFarnesol dehydrogenase OS=Aedes aegypti OX=7159 GN=SDR-1 PE=1 SV=2	INVnr_XP_001867078.1_serine_3-dehydrogenase_[Culex_quinquefasciatus]
(27 genes)	CPIJ002517-PA	Oxidoreductase	farnesol dehydrogenase-like	SDR1_AEDAEFarnesol dehydrogenase OS=Aedes aegypti OX=7159 GN=SDR-1 PE=1 SV=2	INVnr_XP_001844186.1_oxidoreductase_[Culex_quinquefasciatus]
	CPIJ005656-PA	Oxidoreductase	farnesol dehydrogenase-like	SDR1_AEDAEFarnesol dehydrogenase OS=Aedes aegypti OX=7159 GN=SDR-1 PE=1 SV=2	INVnr_XP_001847205.1_oxidoreductase_[Culex_quinquefasciatus]
	CPIJ016740-PA	Conserved hypothetical protein	acyl-coenzyme A thioesterase 13-like	ACO13_MOUSEAcyl-coenzyme A thioesterase 13 OS=Mus musculus OX=10090 GN=Acot13 PE=1 SV=1	INVnr_XP_001866940.1_conserved_hypothetical_protein_[Culex_quinquefasciatus]
	CPIJ016920-PA	NADP-dependent L-serine/L-allo-threonine dehydrogenase ydfG	NADP-dependent L-serine L-allo-threonine dehydrogenase ydfG	SDR1_AEDAEFarnesol dehydrogenase OS=Aedes aegypti OX=7159 GN=SDR-1 PE=1 SV=2	INVnr_XP_001867076.1_NADP-dependent_L-serine/L-allo-threonine_dehydrogenase_ydfG_[Culex_quinquefasciatus]
	CPIJ802304-PA	Conserved hypothetical protein	NA	NA	NA
	CPIJ800180-PA	Cytochrome P450	NA	NA	NA
	CPIJ016849-PA	Cytochrome P450 71B36	cytochrome P450 71B36	C6A23_DROMEProbable cytochrome P450 6a23 OS=Drosophila melanogaster OX=7227 GN=Cyp6a23 PE=2 SV=2	INVnr_XP_001867274.1_cytochrome_P450_71B36_[Culex_quinquefasciatus]
	CPIJ800238-PA	Cytochrome P450	NA	NA	NA
	CPIJ800175-PA	Cytochrome P450	NA	NA	NA
	CPIJ800176-PA	Cytochrome P450	NA	NA	NA
	CPIJ016853-PA	Cytochrome P450 4F12	cytochrome P450 4F12	C6A23_DROMEProbable cytochrome P450 6a23 OS=Drosophila melanogaster OX=7227 GN=Cyp6a23 PE=2 SV=2	INVnr_XP_001867278.1_cytochrome_P450_4F12_[Culex_quinquefasciatus]
	CPIJ016851-PA	Cytochrome P450 6a9	cytochrome P450	CP6A2_DROMECytochrome P450 6a2 OS=Drosophila melanogaster OX=7227 GN=Cyp6a2 PE=2 SV=2	INVnr_XP_001867276.1_cytochrome_P450_6a9_[Culex_quinquefasciatus]
	CPIJ019704-PA	Cytochrome P450 6A1	cytochrome P450 6A1	C6A17_DROMEProbable cytochrome P450 6a17 OS=Drosophila melanogaster OX=7227 GN=Cyp6a17 PE=2 SV=1	INVnr_XP_001870176.1_cytochrome_P450_6A1_[Culex_quinquefasciatus]
	CPIJ800242-PA	Cytochrome P450	NA	NA	NA
	CPIJ020092-PA	Conserved hypothetical protein	lactoylglutathione lyase	LGUL_RATLactoylglutathione lyase OS=Rattus norvegicus OX=10116 GN=Glo1 PE=1 SV=3	INVnr_XP_001870320.1_conserved_hypothetical_protein_[Culex_quinquefasciatus]
	CPIJ002685-PA	POSSIBLE ENOYL-CoA HYDRATASE ECHA12	enoyl- hydratase ECHA12	ECH1_MOUSEDelta(3,5)-Delta(2,4)-dienoyl- mitochondrial OS=Mus musculus OX=10090 GN=Ech1 PE=1 SV=1	INVnr_XP_001844268.1_enoyl-CoA_hydratase_ECHA12_[Culex_quinquefasciatus]
	CPIJ012907-PA	Luciferin 4-monooxygenase	luciferin 4-monooxygenase	4CL3_DICDIProbable 4-coumarate-- ligase 3 OS=Dictyostelium discoideum OX=44689 GN=4cl3 PE=3 SV=2	INVnr_XP_001862983.1_luciferin_4-monooxygenase_[Culex_quinquefasciatus]
	CPIJ015686-PA	Cyclopentanol dehydrogenase	cyclopentanol dehydrogenase	DHB14_HUMAN17-beta-hydroxysteroid dehydrogenase 14 OS=Homo sapiens OX=9606 GN=HSD17B14 PE=1 SV=1	INVnr_XP_001866147.1_cyclopentanol_dehydrogenase_[Culex_quinquefasciatus]
	CPIJ017634-PA	Disulfide oxidoreductase	apoptosis-inducing factor mitochondrial	AIFM1_DROME apoptosis-inducing factor mitochondrial OS=Drosophila melanogaster OX=7227 GN=AIF PE=2 SV=2	INVnr_XP_001868357.1_disulfide_oxidoreductase_[Culex_quinquefasciatus]
	CPIJ016451-PA	crotonobetainyl-CoA dehydrogenase	crotonobetainyl- dehydrogenase	ACADV_MOUSEVery long-chain specific acyl- mitochondrial OS=Mus musculus OX=10090 GN=Acadvl PE=1 SV=3	INVnr_XP_001866600.1_crotonobetainyl-CoA_dehydrogenase_[Culex_quinquefasciatus]
	CPIJ802051-PA	acyl-CoA oxidase	NA	NA	NA
	CPIJ002642-PA	Apoptosis-inducing factor 1, mitochondrial precursor	apoptosis-inducing factor mitochondrial	AIFM1_DROME apoptosis-inducing factor mitochondrial OS=Drosophila melanogaster OX=7227 GN=AIF PE=2 SV=2	INVnr_XP_001844711.1_apoptosis-inducing_factor_1,_mitochondrial_[Culex_quinquefasciatus]
	CPIJ015538-PA	Endonuclease G, mitochondrial precursor	endonuclease mitochondrial	NUCG_CAEELEndonuclease mitochondrial OS=Caenorhabditis elegans OX=6239 GN=cps-6 PE=1 SV=1	INVnr_XP_001865830.1_endonuclease_G,_mitochondrial_[Culex_quinquefasciatus]
	CPIJ011934-PA	Succinyl-coa:3-ketoacid-coenzyme a transferase	succinyl- :3-ketoacid coenzyme A transferase mitochondrial isoform X2	SCOT1_HUMANSuccinyl- :3-ketoacid coenzyme A transferase mitochondrial OS=Homo sapiens OX=9606 GN=OXCT1 PE=1 SV=1	INVnr_XP_001862147.1_succinyl-coa:3-ketoacid-coenzyme_a_transferase_[Culex_quinquefasciatus]
	CPIJ006320-PA	Rieske-domain protein Neverland	rieske-domain Neverland	DAF36_CAEELCholesterol 7-desaturase OS=Caenorhabditis elegans OX=6239 GN=daf-36 PE=1 SV=2	INVnr_XP_001848026.1_rieske-domain_protein_Neverland_[Culex_quinquefasciatus]
	CPIJ014897-PA	Disulfide oxidoreductase	disulfide oxidoreductase	AIFM3_HUMANApoptosis-inducing factor 3 OS=Homo sapiens OX=9606 GN=AIFM3 PE=1 SV=1	INVnr_XP_001864945.1_disulfide_oxidoreductase_[Culex_quinquefasciatus]
3. Malate conversion pyruvate	CPIJ013697-PA	Tricarboxylate transport protein, mitochondrial precursor	tricarboxylate transport mitochondrial	TXTP_CAEEL tricarboxylate transport mitochondrial OS=Caenorhabditis elegans OX=6239 GN= PE=3 SV=1	INVnr_XP_001864030.1_tricarboxylate_transport_protein,_mitochondrial_[Culex_quinquefasciatus]
(8 genes)	CPIJ014557-PA	Nitrilase and fragile histidine triad fusion protein NitFhit	nitrilase and fragile histidine triad fusion hit	NIT2_HUMANOmega-amidase NIT2 OS=Homo sapiens OX=9606 GN=NIT2 PE=1 SV=1	INVnr_XP_001864903.1_nitrilase_and_fragile_histidine_triad_fusion_protein_NitFhit_[Culex_quinquefasciatus]
	CPIJ016639-PA	Acetyl-coa synthetase	acetyl- synthetase	ACSA_DROMEAcetyl-coenzyme A synthetase OS=Drosophila melanogaster OX=7227 GN= oAS PE=2 SV=1	INVnr_XP_001866807.1_acetyl-CoA_synthetase_[Culex_quinquefasciatus]
	CPIJ010518-PA	Phosphoenolpyruvate carboxykinase	phosphoenolpyruvate carboxykinase	PCKG_DROMEPhosphoenolpyruvate carboxykinase	INVnr_XP_001859378.1_phosphoenolpyruvate_carboxykinase_[Culex_quinquefasciatus]
	CPIJ010515-PA	Phosphoenolpyruvate carboxykinase	phosphoenolpyruvate carboxykinase	PCKG_DROMEPhosphoenolpyruvate carboxykinase	INVnr_XP_001859363.1_phosphoenolpyruvate_carboxykinase_[Culex_quinquefasciatus]
	CPIJ014889-PA	Pyruvate dehydrogenase	pyruvate dehydrogenase	ODPT_ASCSUPyruvate dehydrogenase E1 component subunit alpha type mitochondrial (Fragment) OS=Ascaris suum OX=6253 PE=2 SV=1	INVnr_XP_001864937.1_pyruvate_dehydrogenase_[Culex_quinquefasciatus]
	CPIJ008366-PA	Mitochondrial malate dehydrogenase 2	mitochondrial malate dehydrogenase 2	MDHM_RATMalate mitochondrial OS=Rattus norvegicus OX=10116 GN=Mdh2 PE=1 SV=2	INVnr_XP_001849862.1_mitochondrial_malate_dehydrogenase_2_[Culex_quinquefasciatus]
	CPIJ012341-PA	Malic enzyme	malic enzyme	MAOX_ANAPLNADP-dependent malic enzyme OS=Anas platyrhynchos OX=8839 GN=ME1 PE=1 SV=1	INVnr_XP_001862425.1_malic_enzyme_[Culex_quinquefasciatus]
4. Signal peptidase translocon-associated	CPIJ002181-PA	Endoplasmic reticulum-Golgi intermediate compartment protein 3	endoplasmic reticulum-Golgi intermediate compartment 3	ERGI3_XENLAEndoplasmic reticulum-Golgi intermediate compartment 3 OS=Xenopus laevis OX=8355 GN=ergic3 PE=2 SV=1	INVnr_XP_001843851.1_endoplasmic_reticulum-Golgi_intermediate_compartment_protein_3_[Culex_quinquefasciatus]
	CPIJ000872-PA	Signal peptide peptidase	signal peptide peptidase	HM13_MOUSEMinor histocompatibility antigen H13 OS=Mus musculus OX=10090 GN=Hm13 PE=1 SV=1	INVnr_XP_001842495.1_signal_peptide_peptidase_[Culex_quinquefasciatus]
(8 genes)	CPIJ004839-PA	Transmembrane and coiled-coil domain-containing protein 1	transmembrane and coiled-coil domain-containing 1	TMCO1_DANRECalcium load-activated calcium channel OS=Danio rerio OX=7955 GN=tmco1 PE=2 SV=1	INVnr_XP_001846488.1_transmembrane_and_coiled-coil_domain-containing_protein_1_[Culex_quinquefasciatus]
	CPIJ005783-PA	Signal peptidase complex subunit 1	signal peptidase complex subunit 1	SPCS1_DROMESignal peptidase complex subunit 1 OS=Drosophila melanogaster OX=7227 GN=Spase12 PE=1 SV=2	INVnr_XP_001847267.1_signal_peptidase_complex_subunit_1_[Culex_quinquefasciatus]
	CPIJ002042-PA	Translocon-associated protein, delta subunit	translocon-associated delta subunit	SSRD_PONABTranslocon-associated subunit delta OS=Pongo abelii OX=9601 GN=SSR4 PE=2 SV=2	INVnr_XP_001843582.1_translocon-associated_protein,_delta_subunit_[Culex_quinquefasciatus]
	CPIJ801934-PA	Translocon-associated protein subunit gamma	NA	NA	NA
	CPIJ005137-PA	Sec61 protein complex gamma subunit, putative	transport Sec61 subunit gamma	S61G1_DROME transport Sec61 gamma-1 subunit OS=Drosophila melanogaster OX=7227 GN=SEC61G1 PE=3 SV=1	INVnr_XP_019565483.1_PREDICTED:_protein_transport_protein_Sec61_subunit_gamma_[Aedes_albopictus]
	CPIJ009025-PA	Hypothetical protein	transport Sec61 subunit beta-like	SC61B_PONAB transport Sec61 subunit beta OS=Pongo abelii OX=9601 GN=SEC61B PE=3 SV=3	INVnr_XP_019873967.1_PREDICTED:_LOW_QUALITY_PROTEIN:_protein_transport_protein_Sec61_subunit_beta-like_[Aethina_tumida]
5. Catalyse phosphorolytic purine	CPIJ005587-PA	S-adenosylmethionine decarboxylase	s-adenosyl methionine decarboxylase	DCAM_HUMANS-adenosylmethionine decarboxylase proenzyme OS=Homo sapiens OX=9606 GN=AMD1 PE=1 SV=2	INVnr_XP_001847039.1_s-adenosyl_methionine_decarboxylase_[Culex_quinquefasciatus]
	CPIJ017593-PA	Pantetheinase precursor	Vanin 1	VNNL1_DROMEVanin 1 OS=Drosophila melanogaster OX=7227 GN=vanin-like PE=1 SV=1	INVnr_XP_001867961.1_pantetheinase_[Culex_quinquefasciatus]
(7 genes)	CPIJ017592-PA	Vanin-like protein 1 precursor, putative	Vanin 1	VNNL1_DROMEVanin 1 OS=Drosophila melanogaster OX=7227 GN=vanin-like PE=1 SV=1	INVnr_XP_001867960.1_Vanin-like_protein_1_[Culex_quinquefasciatus]
	CPIJ002278-PA	S-methyl-5-thioadenosine phosphorylase	S-methyl-5 -thioadenosine phosphorylase	MTAP_AEDAES-methyl-5 -thioadenosine phosphorylase OS=Aedes aegypti OX=7159 GN=AAEL012172 PE=3 SV=1	INVnr_XP_001843947.1_S-methyl-5-thioadenosine_phosphorylase_[Culex_quinquefasciatus]
	CPIJ002523-PA	Spermidine synthase	spermidine synthase	SPEE_MOUSESpermidine synthase OS=Mus musculus OX=10090 GN=Srm PE=1 SV=1	INVnr_XP_001844192.1_spermidine_synthase_[Culex_quinquefasciatus]
	CPIJ801876-PA	Cytidine deaminase	NA	NA	NA
	CPIJ007359-PA	Purine nucleoside phosphorylase	NA	NA	NA
6. Nuclear pore complex	CPIJ012737-PA	Nucleoporin 50kDa	nucleoporin 50kDa	NUP50_DROMENuclear pore complex Nup50 OS=Drosophila melanogaster OX=7227 GN=Nup50 PE=2 SV=1	INVnr_XP_001863028.1_nucleoporin_50kDa_[Culex_quinquefasciatus]
(7 genes)	CPIJ010425-PA	Transportin-3	transportin-3 isoform X2	TNPO3_HUMANTransportin-3 OS=Homo sapiens OX=9606 GN=TNPO3 PE=1 SV=3	INVnr_XP_001853537.1_transportin-3_[Culex_quinquefasciatus]
	CPIJ002096-PA	Importin-7	importin-7 isoform X2	IPO7_MOUSEImportin-7 OS=Mus musculus OX=10090 GN=Ipo7 PE=1 SV=2	INVnr_XP_001843364.1_importin-7_[Culex_quinquefasciatus]
	CPIJ008595-PA	Ran	GTP-binding nuclear Ran	RAN_DROMEGTP-binding nuclear Ran OS=Drosophila melanogaster OX=7227 GN=Ran PE=1 SV=1	INVnr_XP_019538297.1_PREDICTED:_GTP-binding_nuclear_protein_Ran_[Aedes_albopictus]
	CPIJ801427-PA	GTPase activating protein RanGAP1	NA	NA	NA
	CPIJ003997-PA	Nuclear pore complex protein Nup107	nuclear pore complex Nup107	NU107_DROMENuclear pore complex Nup107 OS=Drosophila melanogaster OX=7227 GN=Nup107 PE=1 SV=1	INVnr_XP_001845583.1_nuclear_pore_complex_protein_Nup107_[Culex_quinquefasciatus]
	CPIJ018427-PA	Nuclear pore complex protein nup93	nuclear pore complex nup93	NU931_DROMENuclear pore complex Nup93-1 OS=Drosophila melanogaster OX=7227 GN=Nup93-1 PE=1 SV=1	INVnr_XP_001868558.1_nuclear_pore_complex_protein_nup93_[Culex_quinquefasciatus]
7. Leukotriene B4 desydrogenase	CPIJ014672-PA	Conserved hypothetical protein	alpha-tocopherol transfer -like	PINTA_DROMERetinol-binding pinta OS=Drosophila melanogaster OX=7227 GN=pinta PE=2 SV=1	INVnr_XP_001865347.1_conserved_hypothetical_protein_[Culex_quinquefasciatus]
(6 genes)	CPIJ003802-PA	NADP-dependent leukotriene B4 12-hydroxydehydrogenase	NADP-dependent leukotriene B4 12-hydroxydehydrogenase	PTGR1_MOUSEProstaglandin reductase 1 OS=Mus musculus OX=10090 GN=Ptgr1 PE=1 SV=2	INVnr_XP_001845375.1_NADP-dependent_leukotriene_B4_12-hydroxydehydrogenase_[Culex_quinquefasciatus]
	CPIJ003801-PA	NADP-dependent leukotriene B4 12-hydroxydehydrogenase	NADP-dependent leukotriene B4 12-hydroxydehydrogenase	PTGR1_CAVPOProstaglandin reductase 1 OS=Cavia porcellus OX=10141 GN=Ptgr1 PE=1 SV=1	INVnr_XP_001845374.1_NADP-dependent_leukotriene_B4_12-hydroxydehydrogenase_[Culex_quinquefasciatus]
	CPIJ010835-PA	Short-chain dehydrogenase	short-chain dehydrogenase	RDH13_HUMANRetinol dehydrogenase 13 OS=Homo sapiens OX=9606 GN=RDH13 PE=1 SV=2	INVnr_XP_001861330.1_short-chain_dehydrogenase_[Culex_quinquefasciatus]
	CPIJ802302-PA	Short-chain dehydrogenase	NA	NA	NA
	CPIJ011502-PA	Short-chain dehydrogenase	short-chain dehydrogenase	RDH11_HUMANRetinol dehydrogenase 11 OS=Homo sapiens OX=9606 GN=RDH11 PE=1 SV=2	INVnr_XP_001861515.1_short-chain_dehydrogenase_[Culex_quinquefasciatus]
8. 1-acyl-sn-glycerol-3-phosphate acyltransferase beta	CPIJ002958-PA	Sterol o-acyltransferase	sterol o-acyltransferase	SOAT1_HUMANSterol O-acyltransferase 1 OS=Homo sapiens OX=9606 GN=SOAT1 PE=1 SV=3	INVnr_XP_001844576.1_sterol_o-acyltransferase_[Culex_quinquefasciatus]
	CPIJ802153-PA	1-acyl-sn-glycerol-3-phosphate acyltransferase beta	NA	NA	NA
(6 genes)	CPIJ019694-PA	Ceramide glucosyltransferase	ceramide glucosyltransferase	CEGT_HUMANCeramide glucosyltransferase OS=Homo sapiens OX=9606 GN=UGCG PE=1 SV=1	INVnr_XP_001869890.1_ceramide_glucosyltransferase_[Culex_quinquefasciatus]
	CPIJ000415-PA	Phosphatidyltransferase	ethanolaminephosphotransferase 1-like isoform X1	EPT1_HUMANEthanolaminephosphotransferase 1 OS=Homo sapiens OX=9606 GN=SELENOI PE=1 SV=3	INVnr_XP_001842085.1_phosphatidyltransferase_[Culex_quinquefasciatus]
	CPIJ000134-PA	Phosphatidate phosphatase	phosphatidate phosphatase	WUN_DROME phosphatidate phosphatase OS=Drosophila melanogaster OX=7227 GN=wun PE=1 SV=2	INVnr_XP_001841804.1_phosphatidate_phosphatase_[Culex_quinquefasciatus]
	CPIJ802146-PA	1-acyl-sn-glycerol-3-phosphate acyltransferase	NA	NA	NA

## Sheet: up-regulated
Table S2. Description of ten STRING clusters found for upregulated genes of Culex quinquefasciatus larvae from a Lysinibacillus sphaericus resistant colony (RIAB59) compared to a susceptible colony.
X_mclCluster	Gene id	Annotation	blast2go_nr_annotation	blast2go_uniprot_annotation	blast_nr_annotation
1. Protease Factor DNA	CPIJ010133-PA	Structural maintenance of chromosomes smc2	structural maintenance of chromosomes 2	SMC2_XENLAStructural maintenance of chromosomes 2 OS=Xenopus laevis OX=8355 GN=smc2 PE=1 SV=1	INVnr_XP_001851491.1_structural_maintenance_of_chromosomes_smc2_[Culex_quinquefasciatus]
(69 genes)	CPIJ000949-PA	Structural maintenance of chromosomes smc4	structural maintenance of chromosomes smc4	SMC4_XENLAStructural maintenance of chromosomes 4 OS=Xenopus laevis OX=8355 GN=smc4 PE=1 SV=1	INVnr_XP_001842620.1_structural_maintenance_of_chromosomes_smc4_[Culex_quinquefasciatus]
	CPIJ001689-PA	Condensin	condensin complex subunit 1 isoform X2	CND1_MOUSECondensin complex subunit 1 OS=Mus musculus OX=10090 GN=Ncapd2 PE=1 SV=2	INVnr_XP_001843229.1_condensin_[Culex_quinquefasciatus]
	CPIJ008363-PA	DNA replication licensing factor MCM1	DNA replication licensing factor MCM1	MCM9_XENTRDNA helicase MCM9 OS=Xenopus tropicalis OX=8364 GN=mcm9 PE=3 SV=1	INVnr_XP_001849859.1_DNA_replication_licensing_factor_MCM1_[Culex_quinquefasciatus]
	CPIJ005091-PA	DNA replication licensing factor MCM8	DNA replication licensing factor MCM8	MCM8_RATDNA helicase MCM8 OS=Rattus norvegicus OX=10116 GN=Mcm8 PE=3 SV=1	INVnr_XP_001846901.1_DNA_replication_licensing_factor_MCM8_[Culex_quinquefasciatus]
	CPIJ006166-PA	Deltamethrin resistance-associated NYD-GBE	deltamethrin resistance-associated NYD-GBE	GLGB_MOUSE1,4-alpha-glucan-branching enzyme OS=Mus musculus OX=10090 GN=Gbe1 PE=1 SV=1	INVnr_XP_001847610.1_deltamethrin_resistance-associated_NYD-GBE_[Culex_quinquefasciatus]
	CPIJ010018-PA	DNA topoisomerase 2	DNA topoisomerase 2	TOP2_DROMEDNA topoisomerase 2 OS=Drosophila melanogaster OX=7227 GN=Top2 PE=1 SV=1	INVnr_XP_001851377.1_DNA_topoisomerase_2_[Culex_quinquefasciatus]
	CPIJ018222-PA	Alpha-amylase B precursor	alpha-amylase A	AMYA_DROMAAlpha-amylase A OS=Drosophila mauritiana OX=7226 GN=Amy-d PE=3 SV=1	INVnr_XP_001868570.1_alpha-amylase_B_[Culex_quinquefasciatus]
	CPIJ017078-PA	Conserved hypothetical protein	split ends isoform X4	CECR2_MOUSECat eye syndrome critical region 2 homolog OS=Mus musculus OX=10090 GN=Cecr2 PE=1 SV=1	INVnr_XP_001867208.1_conserved_hypothetical_protein_[Culex_quinquefasciatus]
	CPIJ017077-PA	Conserved hypothetical protein	split ends-like isoform X4	CECR2_MOUSECat eye syndrome critical region 2 homolog OS=Mus musculus OX=10090 GN=Cecr2 PE=1 SV=1	INVnr_XP_001867207.1_conserved_hypothetical_protein_[Culex_quinquefasciatus]
	CPIJ801820-PA	Ku P80 DNA helicase	NA	NA	NA
	CPIJ004115-PA	DNA repair protein RAD50	DNA repair RAD50	RAD50_DROMEDNA repair RAD50 OS=Drosophila melanogaster OX=7227 GN=rad50 PE=2 SV=4	INVnr_XP_001845783.1_DNA_repair_protein_RAD50_[Culex_quinquefasciatus]
	CPIJ007521-PA	Structural maintenance of chromosomes protein 6	structural maintenance of chromosomes 6	SMC6B_ARATHStructural maintenance of chromosomes 6B OS=Arabidopsis thaliana OX=3702 GN=SMC6B PE=2 SV=1	INVnr_XP_001849335.1_structural_maintenance_of_chromosomes_protein_6_[Culex_quinquefasciatus]
	CPIJ802449-PA	Gamma-glutamyltranspeptidase precursor	NA	NA	NA
	CPIJ004237-PA	Conserved hypothetical protein	recQ-mediated genome instability 1-like	RMI1_XENLA -mediated genome instability 1 OS=Xenopus laevis OX=8355 GN=rmi1 PE=2 SV=1	INVnr_XP_001845817.1_conserved_hypothetical_protein_[Culex_quinquefasciatus]
	CPIJ004443-PA	Origin recognition complex subunit	origin recognition complex subunit	ORC5_DROMEOrigin recognition complex subunit 5 OS=Drosophila melanogaster OX=7227 GN=Orc5 PE=1 SV=1	INVnr_XP_001846029.1_origin_recognition_complex_subunit_[Culex_quinquefasciatus]
	CPIJ014043-PA	Conserved hypothetical protein	high mobility group DSP1-like	HMG2_DROMEHigh mobility group DSP1 OS=Drosophila melanogaster OX=7227 GN=Dsp1 PE=2 SV=1	INVnr_XP_001864141.1_conserved_hypothetical_protein_[Culex_quinquefasciatus]
	CPIJ006165-PA	General transcription factor 3C polypeptide 3	general transcription factor 3C polypeptide 3	TF3C3_HUMANGeneral transcription factor 3C polypeptide 3 OS=Homo sapiens OX=9606 GN=GTF3C3 PE=1 SV=1	INVnr_XP_001847609.1_general_transcription_factor_3C_polypeptide_3_[Culex_quinquefasciatus]
	CPIJ007658-PA	Werner syndrome helicase	werner syndrome helicase	WRN_HUMANWerner syndrome ATP-dependent helicase OS=Homo sapiens OX=9606 GN=WRN PE=1 SV=2	INVnr_XP_001849186.1_werner_syndrome_helicase_[Culex_quinquefasciatus]
	CPIJ001777-PA	Ataxia telangiectasia mutated, putative	ataxia telangiectasia mutated	ATM_DROMESerine threonine- kinase ATM OS=Drosophila melanogaster OX=7227 GN=tefu PE=2 SV=1	INVnr_XP_001843451.1_ataxia_telangiectasia_mutated_[Culex_quinquefasciatus]
	CPIJ017892-PA	Replication factor C large subunit, putative	replication factor C large subunit	RFC1_DROMEReplication factor C subunit 1 OS=Drosophila melanogaster OX=7227 GN=Gnf1 PE=1 SV=2	INVnr_XP_001868075.1_replication_factor_C_large_subunit_[Culex_quinquefasciatus]
	CPIJ012750-PA	Gamma-tubulin complex component 3	gamma-tubulin complex component 3	GCP3_DROMEGamma-tubulin complex component 3 OS=Drosophila melanogaster OX=7227 GN=Grip91 PE=1 SV=2	INVnr_XP_001863041.1_gamma-tubulin_complex_component_3_[Culex_quinquefasciatus]
	CPIJ011293-PA	Conserved hypothetical protein	gamma-tubulin complex component 6	GCP6_HUMANGamma-tubulin complex component 6 OS=Homo sapiens OX=9606 GN=TUBGCP6 PE=1 SV=3	INVnr_XP_001861522.1_conserved_hypothetical_protein_[Culex_quinquefasciatus]
	CPIJ018632-PA	Glutathione-s-transferase theta, gst	glutathione-s-transferase gst	GSTT1_MANSEGlutathione S-transferase 1 OS=Manduca sexta OX=7130 GN=GST1 PE=2 SV=1	INVnr_XP_001868775.1_glutathione-s-transferase_theta,_gst_[Culex_quinquefasciatus]
	CPIJ019900-PA	Inositol-1-monophosphatase	inositol monophosphatase 2-like	SUHB_VIBCHInositol-1-monophosphatase OS=Vibrio cholerae serotype O1 (strain ATCC 39315 El Tor Inaba N16961) OX=243277 GN=VC_0745 PE=3 SV=2	INVnr_XP_001870231.1_inositol-1-monophosphatase_[Culex_quinquefasciatus]
	CPIJ017178-PA	Myoinositol oxygenase	myoinositol oxygenase	MIOX_DANREInositol oxygenase OS=Danio rerio OX=7955 GN=miox PE=2 SV=1	INVnr_XP_001867463.1_myoinositol_oxygenase_[Culex_quinquefasciatus]
	CPIJ007543-PA	Conserved hypothetical protein	transcriptional repressor p66-beta isoform X2	P66B_MOUSETranscriptional repressor p66-beta OS=Mus musculus OX=10090 GN=Gatad2b PE=1 SV=1	INVnr_XP_001849659.1_conserved_hypothetical_protein_[Culex_quinquefasciatus]
	CPIJ019303-PA	Transcription termination factor 2	transcription termination factor 2	TTF2_DROMETranscription termination factor 2 OS=Drosophila melanogaster OX=7227 GN=lds PE=1 SV=2	INVnr_XP_001869656.1_transcription_termination_factor_2_[Culex_quinquefasciatus]
	CPIJ802274-PA	Conserved hypothetical protein	NA	NA	NA
	CPIJ009998-PA	Transcriptional regulator ATRX, putative	transcriptional regulator ATRX homolog	ATRX_DROMETranscriptional regulator ATRX homolog OS=Drosophila melanogaster OX=7227 GN=XNP PE=1 SV=2	INVnr_XP_001853354.1_transcriptional_regulator_ATRX_[Culex_quinquefasciatus]
	CPIJ015633-PA	Conserved hypothetical protein	probable serine threonine- kinase kinX	---NA---	INVnr_XP_001865894.1_conserved_hypothetical_protein_[Culex_quinquefasciatus]
	CPIJ000263-PA	DNA repair protein RAD16	DNA repair RAD16	SHPRH_MOUSEE3 ubiquitin- ligase SHPRH OS=Mus musculus OX=10090 GN=Shprh PE=1 SV=1	INVnr_XP_001841836.1_DNA_repair_protein_RAD16_[Culex_quinquefasciatus]
	CPIJ017371-PA	Phd finger protein	phd finger	BRPF1_MOUSEPeregrin OS=Mus musculus OX=10090 GN=Brpf1 PE=1 SV=1	INVnr_XP_001867456.1_phd_finger_protein_[Culex_quinquefasciatus]
	CPIJ009147-PA	Serine/threonine-protein kinase chk2	ovarian-specific serine threonine- kinase Lok isoform X1	LOK_DROMEOvarian-specific serine threonine- kinase Lok OS=Drosophila melanogaster OX=7227 GN=lok PE=2 SV=1	INVnr_XP_001850809.1_serine/threonine-protein_kinase_chk2_[Culex_quinquefasciatus]
	CPIJ012525-PA	Conserved hypothetical protein	nipped-B -like	NIPB_DROMENipped-B OS=Drosophila melanogaster OX=7227 GN=Nipped-B PE=1 SV=3	INVnr_XP_001863077.1_conserved_hypothetical_protein_[Culex_quinquefasciatus]
	CPIJ017085-PA	2-oxoglutarate dehydrogenase E1 component	probable 2-oxoglutarate dehydrogenase E1 component DHKTD1 mitochondrial	DHTK1_DROMEProbable 2-oxoglutarate dehydrogenase E1 component DHKTD1 mitochondrial OS=Drosophila melanogaster OX=7227 GN=CG1544 PE=2 SV=2	INVnr_XP_001867443.1_2-oxoglutarate_dehydrogenase_E1_component_[Culex_quinquefasciatus]
	CPIJ002118-PA	Iron-responsive element-binding protein 1	iron-responsive element-binding 1	ACOC_MOUSECytoplasmic aconitate hydratase OS=Mus musculus OX=10090 GN=Aco1 PE=1 SV=3	INVnr_XP_001843386.1_iron-responsive_element-binding_protein_1_[Culex_quinquefasciatus]
	CPIJ007271-PA	Polybromo-1	polybromo-1-like isoform X2	PB1_HUMAN polybromo-1 OS=Homo sapiens OX=9606 GN=PBRM1 PE=1 SV=1	INVnr_XP_001848807.1_polybromo-1_[Culex_quinquefasciatus]
	CPIJ004184-PA	DNA-repair protein complementing XP-G cells	DNA-repair complementing XP-G cells	ERCC5_HUMANDNA repair complementing XP-G cells OS=Homo sapiens OX=9606 GN=ERCC5 PE=1 SV=3	INVnr_XP_001845908.1_DNA-repair_protein_complementing_XP-G_cells_[Culex_quinquefasciatus]
	CPIJ012304-PA	Poly	poly [ADP-ribose] polymerase	PARP_SARPEPoly	INVnr_XP_001862547.1_poly_[Culex_quinquefasciatus]
	CPIJ010618-PA	Pyrazinamidase/nicotinamidase	pyrazinamidase nicotinamidase	PNCA_ECOLINicotinamidase OS=Escherichia coli (strain K12) OX=83333 GN=pncA PE=1 SV=1	INVnr_XP_001859965.1_pyrazinamidase/nicotinamidase_[Culex_quinquefasciatus]
	CPIJ012300-PA	Nonsense-mediated mrna decay protein 1	regulator of nonsense transcripts 1 homolog	RENT1_DROMERegulator of nonsense transcripts 1 homolog OS=Drosophila melanogaster OX=7227 GN=Upf1 PE=1 SV=2	INVnr_XP_001862543.1_nonsense-mediated_mRNA_decay_protein_1_[Culex_quinquefasciatus]
	CPIJ018287-PA	DNA polymerase delta catalytic subunit	DNA polymerase delta catalytic subunit	DPOD1_DROMEDNA polymerase delta catalytic subunit OS=Drosophila melanogaster OX=7227 GN=DNApol-delta PE=2 SV=2	INVnr_XP_001868453.1_DNA_polymerase_delta_catalytic_subunit_[Culex_quinquefasciatus]
	CPIJ012084-PA	Conserved hypothetical protein	neurofilament heavy polypeptide	---NA---	INVnr_XP_001862038.1_conserved_hypothetical_protein_[Culex_quinquefasciatus]
	CPIJ012893-PA	Conserved hypothetical protein	conserved hypothetical protein	BRCA2_FELCABreast cancer type 2 susceptibility homolog OS=Felis catus OX=9685 GN=BRCA2 PE=2 SV=2	INVnr_XP_001863104.1_conserved_hypothetical_protein_[Culex_quinquefasciatus]
	CPIJ005884-PA	Eukaryotic translation initiation factor 2-alpha kinase 1	eukaryotic translation initiation factor 2-alpha kinase 1	E2AK4_RA -2-alpha kinase GCN2 OS=Rattus norvegicus OX=10116 GN=Eif2ak4 PE=3 SV=2	INVnr_XP_001847709.1_eukaryotic_translation_initiation_factor_2-alpha_kinase_1_[Culex_quinquefasciatus]
	CPIJ012852-PA	Conserved hypothetical protein	DNA-repair XRCC1	XRCC1_RATDNA repair XRCC1 OS=Rattus norvegicus OX=10116 GN=Xrcc1 PE=1 SV=2	INVnr_XP_001863088.1_conserved_hypothetical_protein_[Culex_quinquefasciatus]
	CPIJ008308-PA	Conserved hypothetical protein	aprataxin and PNK-like factor isoform X4	APLF_DROMEAprataxin and PNK-like factor OS=Drosophila melanogaster OX=7227 GN=CG6171 PE=1 SV=1	INVnr_XP_001849424.1_conserved_hypothetical_protein_[Culex_quinquefasciatus]
	CPIJ008322-PA	Conserved hypothetical protein	lin-54 homolog	LIN54_RAT lin-54 homolog OS=Rattus norvegicus OX=10116 GN=Lin54 PE=1 SV=2	INVnr_XP_001849706.1_conserved_hypothetical_protein_[Culex_quinquefasciatus]
	CPIJ013879-PA	DNA polymerase theta, putative	DNA polymerase theta	DPOLQ_DROMEDNA polymerase theta OS=Drosophila melanogaster OX=7227 GN=mus308 PE=1 SV=1	INVnr_XP_001864122.1_DNA_polymerase_theta_[Culex_quinquefasciatus]
	CPIJ801673-PA	Conserved hypothetical protein	NA	NA	NA
	CPIJ020244-PA	Conserved hypothetical protein	CD98hc amino acid transporter	4F2_RABIT4F2 cell-surface antigen heavy chain OS=Oryctolagus cuniculus OX=9986 GN=SLC3A2 PE=1 SV=2	INVnr_XP_001870546.1_conserved_hypothetical_protein_[Culex_quinquefasciatus]
	CPIJ008743-PA	valyl-tRNA synthetase	valyl-tRNA synthetase	SYVC_RATValine--tRNA ligase OS=Rattus norvegicus OX=10116 GN=Vars PE=2 SV=2	INVnr_XP_001850398.1_valyl-tRNA_synthetase_[Culex_quinquefasciatus]
	CPIJ009567-PA	Ornithine decarboxylase	ornithine decarboxylase	DCOR_RATOrnithine decarboxylase OS=Rattus norvegicus OX=10116 GN=Odc1 PE=1 SV=1	INVnr_XP_001851194.1_ornithine_decarboxylase_[Culex_quinquefasciatus]
	CPIJ012146-PA	Ribose-phosphate pyrophosphokinase 1,2	phosphoribosyl pyrophosphate synthase-associated 2 isoform X2	KPRB_CHICKPhosphoribosyl pyrophosphate synthase-associated 2 OS=Gallus gallus OX=9031 GN=PRPSAP2 PE=2 SV=1	INVnr_XP_001862760.1_ribose-phosphate_pyrophosphokinase_1,2_[Culex_quinquefasciatus]
	CPIJ013919-PA	Xanthine dehydrogenase/oxidase	xanthine dehydrogenase oxidase	XDH_DROMEXanthine dehydrogenase OS=Drosophila melanogaster OX=7227 GN=ry PE=2 SV=2	INVnr_XP_001864333.1_xanthine_dehydrogenase/oxidase_[Culex_quinquefasciatus]
	CPIJ002582-PA	Conserved hypothetical protein	AMP deaminase 2 isoform X1	AMPD2_RATAMP deaminase 2 OS=Rattus norvegicus OX=10116 GN=Ampd2 PE=1 SV=2	INVnr_XP_001844651.1_conserved_hypothetical_protein_[Culex_quinquefasciatus]
	CPIJ014907-PA	Xaa-pro dipeptidase	xaa-pro dipeptidase	PEPD_HUMANXaa-Pro dipeptidase OS=Homo sapiens OX=9606 GN=PEPD PE=1 SV=3	INVnr_XP_001865452.1_xaa-pro_dipeptidase_[Culex_quinquefasciatus]
	CPIJ014397-PA	Xaa-pro dipeptidase	xaa-pro dipeptidase	PEPD_HUMANXaa-Pro dipeptidase OS=Homo sapiens OX=9606 GN=PEPD PE=1 SV=3	INVnr_XP_001864675.1_xaa-pro_dipeptidase_[Culex_quinquefasciatus]
	CPIJ005082-PA	Pyrroline-5-carboxylate reductase	pyrroline-5-carboxylate reductase	P5CR1_MOUSEPyrroline-5-carboxylate reductase mitochondrial OS=Mus musculus OX=10090 GN=Pycr1 PE=1 SV=1	INVnr_XP_001846563.1_pyrroline-5-carboxylate_reductase_[Culex_quinquefasciatus]
	CPIJ010067-PA	ATP-binding cassette sub-family A member 3	ATP-binding cassette sub-family A member 3	ABCA3_HUMANATP-binding cassette sub-family A member 3 OS=Homo sapiens OX=9606 GN=ABCA3 PE=1 SV=2	INVnr_XP_001851801.1_ATP-binding_cassette_sub-family_A_member_3_[Culex_quinquefasciatus]
	CPIJ002663-PA	Glutathione S-transferase 1-1	glutathione S-transferase 1-1	GST1D_ANOGAGlutathione S-transferase isoform D OS=Anopheles gambiae OX=7165 GN= 1 PE=1 SV=1	INVnr_XP_001844246.1_glutathione_S-transferase_1-1_[Culex_quinquefasciatus]
	CPIJ005246-PA	Abhydrolase domain-containing protein 7	abhydrolase domain-containing 7	CEEH1_CAEELEpoxide hydrolase 1 OS=Caenorhabditis elegans OX=6239 GN=ceeh-1 PE=1 SV=1	INVnr_XP_001847565.1_abhydrolase_domain-containing_protein_7_[Culex_quinquefasciatus]
	CPIJ801520-PA	Low molecular weight protein-tyrosine-phosphatase	NA	NA	NA
	CPIJ012664-PA	Conserved hypothetical protein	RING finger 17-like	TDRD1_ORYLATudor domain-containing 1 OS=Oryzias latipes OX=8090 GN=tdrd1 PE=2 SV=1	INVnr_XP_001862963.1_conserved_hypothetical_protein_[Culex_quinquefasciatus]
	CPIJ801553-PA	Ribonuclease Z, mitochondrial precursor	NA	NA	NA
	CPIJ008851-PA	Maltose phosphorylase	maltose phosphorylase	PGGHG_DICDI -glucosylgalactosylhydroxylysine glucosidase OS=Dictyostelium discoideum OX=44689 GN=pgghg PE=3 SV=2	INVnr_XP_001850769.1_maltose_phosphorylase_[Culex_quinquefasciatus]
	CPIJ011492-PA	JmjC domain-containing histone demethylation protein 3C	domain-containing histone demethylation 3C	KDM4B_DROMEProbable lysine-specific demethylase 4B OS=Drosophila melanogaster OX=7227 GN=Kdm4B PE=3 SV=3	INVnr_XP_001861505.1_JmjC_domain-containing_histone_demethylation_protein_3C_[Culex_quinquefasciatus]
	CPIJ010386-PA	Protease m50 membrane-bound transcription factor site 2 protease	protease m50 membrane-bound transcription factor site 2 protease	MBTP2_MOUSEMembrane-bound transcription factor site-2 protease OS=Mus musculus OX=10090 GN=Mbtps2 PE=2 SV=1	INVnr_XP_001870882.1_protease_m50_membrane-bound_transcription_factor_site_2_protease_[Culex_quinquefasciatus]
2. Protein f-box wd40	CPIJ010980-PA	Anaphase-promoting complex subunit 8	anaphase-promoting complex subunit 8	CDC23_HUMANCell division cycle 23 homolog OS=Homo sapiens OX=9606 GN=CDC23 PE=1 SV=3	INVnr_XP_001861794.1_anaphase-promoting_complex_subunit_8_[Culex_quinquefasciatus]
(41 genes)	CPIJ009644-PA	Anaphase-promoting complex subunit 4	anaphase-promoting complex subunit 4	APC4_HUMANAnaphase-promoting complex subunit 4 OS=Homo sapiens OX=9606 GN=ANAPC4 PE=1 SV=2	INVnr_XP_001850950.1_anaphase-promoting_complex_subunit_4_[Culex_quinquefasciatus]
	CPIJ015211-PA	Imaginal discs arrested, putative	imaginal discs arrested	APC5_MOUSEAnaphase-promoting complex subunit 5 OS=Mus musculus OX=10090 GN=Anapc5 PE=1 SV=1	INVnr_XP_001865616.1_imaginal_discs_arrested_[Culex_quinquefasciatus]
	CPIJ004484-PA	Conserved hypothetical protein	actin-related 8	ARP8_AEDAEActin-related 8 OS=Aedes aegypti OX=7159 GN=Arp8 PE=3 SV=1	INVnr_XP_001846070.1_conserved_hypothetical_protein_[Culex_quinquefasciatus]
	CPIJ003226-PA	Actin	ARP5_AEDAE ame: Full=Actin-related 5	ARP5_AEDAEActin-related 5 OS=Aedes aegypti OX=7159 GN=Arp5 PE=3 SV=1	INVnr_XP_001844597.1_actin_[Culex_quinquefasciatus]
	CPIJ008670-PA	Wd-repeat protein	wd-repeat protein	TAF5L_MOUSETAF5-like RNA polymerase II p300 CBP-associated factor-associated factor 65 kDa subunit 5L OS=Mus musculus OX=10090 GN=Taf5l PE=2 SV=1	INVnr_XP_001850238.1_wd-repeat_protein_[Culex_quinquefasciatus]
	CPIJ006105-PA	Cyclin-dependent kinases regulatory subunit 1	cyclin-dependent kinaseregulatory subunit 1	CKS1_DROMECyclin-dependent kinases regulatory subunit OS=Drosophila melanogaster OX=7227 GN=Cks30A PE=3 SV=1	INVnr_XP_001847988.1_cyclin-dependent_kinaseregulatory_subunit_1_[Culex_quinquefasciatus]
	CPIJ000065-PA	Cell division protein kinase 5	cyclin-dependent kinase 5 homolog	CDK5_GLOMMCyclin-dependent kinase 5 homolog OS=Glossina morsitans morsitans OX=37546 GN=Cdk5 PE=2 SV=1	INVnr_XP_001841735.1_cell_division_protein_kinase_5_[Culex_quinquefasciatus]
	CPIJ012122-PA	F-box and wd40 domain protein 7	f-box and wd40 domain 7	FBXW7_DROMEF-box WD repeat-containing 7 OS=Drosophila melanogaster OX=7227 GN=ago PE=1 SV=1	INVnr_XP_001862870.1_f-box_and_wd40_domain_protein_7_[Culex_quinquefasciatus]
	CPIJ003639-PA	S-phase kinase-associated protein 2	S-phase kinase-associated 2	SKP2_HUMANS-phase kinase-associated 2 OS=Homo sapiens OX=9606 GN=SKP2 PE=1 SV=2	INVnr_XP_001845418.1_S-phase_kinase-associated_protein_2_[Culex_quinquefasciatus]
	CPIJ802190-PA	Sin3b	NA	NA	NA
	CPIJ012311-PA	Histone deacetylase	histone deacetylase	HDAC6_HUMANHistone deacetylase 6 OS=Homo sapiens OX=9606 GN=HDAC6 PE=1 SV=2	INVnr_XP_001862395.1_histone_deacetylase_[Culex_quinquefasciatus]
	CPIJ004606-PA	Phd finger domain	phd finger domain	P20L1_MOUSEPHD finger 20 1 OS=Mus musculus OX=10090 GN=Phf20l1 PE=1 SV=2	INVnr_XP_001846370.1_phd_finger_domain_[Culex_quinquefasciatus]
	CPIJ018900-PA	Conserved hypothetical protein	histone type 2	CENPA_NEUCRHistone H3-like centromeric hH3v OS=Neurospora crassa (strain ATCC 24698 74-OR23-1A CBS DSM 1257 FGSC 987) OX=367110 GN=hH3v PE=3 SV=1	INVnr_XP_001869113.1_conserved_hypothetical_protein_[Culex_quinquefasciatus]
	CPIJ012812-PA	Thyroid hormone receptor interactor 12	E3 ubiquitin- ligase TRIP12	TRIPC_XENTRE3 ubiquitin- ligase TRIP12 OS=Xenopus tropicalis OX=8364 GN=trip12 PE=2 SV=1	INVnr_XP_001863312.1_thyroid_hormone_receptor_interactor_12_[Culex_quinquefasciatus]
	CPIJ011785-PA	E3 ubiquitin-protein ligase nedd-4	E3 ubiquitin- ligase nedd-4	NEDD4_DROMEE3 ubiquitin- ligase Nedd-4 OS=Drosophila melanogaster OX=7227 GN=Nedd4 PE=1 SV=2	INVnr_XP_001862528.1_E3_ubiquitin-protein_ligase_nedd-4_[Culex_quinquefasciatus]
	CPIJ018355-PA	Smad, putative	smad	SMAD2_DANREMothers against decapentaplegic homolog 2 OS=Danio rerio OX=7955 GN=smad2 PE=2 SV=1	INVnr_XP_001868726.1_smad_[Culex_quinquefasciatus]
	CPIJ003766-PA	Conserved hypothetical protein	forkhead box K1	FOXK2_XENLAForkhead box K2 OS=Xenopus laevis OX=8355 GN=foxk2 PE=2 SV=2	INVnr_XP_001845339.1_conserved_hypothetical_protein_[Culex_quinquefasciatus]
	CPIJ010005-PA	RING finger protein 126-B	RING finger 126-B	RN126_XENTRE3 ubiquitin- ligase RNF126 OS=Xenopus tropicalis OX=8364 GN=rnf126 PE=2 SV=1	INVnr_XP_001870705.1_RING_finger_protein_126-B_[Culex_quinquefasciatus]
	CPIJ016186-PA	Conserved hypothetical protein	E3 ubiquitin- ligase arkadia-B	RN165_HUMANE3 ubiquitin- ligase RNF165 OS=Homo sapiens OX=9606 GN=RNF165 PE=1 SV=1	INVnr_XP_001866274.1_conserved_hypothetical_protein_[Culex_quinquefasciatus]
	CPIJ012914-PA	Cyclin t	cyclin T	CCNT_DROMECyclin-T OS=Drosophila melanogaster OX=7227 GN= PE=1 SV=2	INVnr_XP_001863201.1_cyclin_T_[Culex_quinquefasciatus]
	CPIJ012920-PA	F-box only protein 9	F-box only 9	FBX9_BOVINF-box only 9 OS=Bos taurus OX=9913 GN=FBXO9 PE=2 SV=2	INVnr_XP_001863207.1_F-box_only_protein_9_[Culex_quinquefasciatus]
	CPIJ014283-PA	Heat shock protein 70 B2	heat shock 70 kDa cognate 2	HSP7B_DROMEHeat shock 70 kDa cognate 2 OS=Drosophila melanogaster OX=7227 GN=Hsc70-2 PE=1 SV=2	INVnr_XP_001864723.1_heat_shock_protein_70_B2_[Culex_quinquefasciatus]
	CPIJ008349-PA	GATA transcription factor GATAc	erythroid transcription factor isoform X3	GAT6A_XENLAGATA-binding factor 6-A OS=Xenopus laevis OX=8355 GN=gata6-a PE=2 SV=1	INVnr_XP_001849613.1_GATA_transcription_factor_GATAc_[Culex_quinquefasciatus]
	CPIJ016134-PA	Ubiquitin carboxyl-terminal hydrolase 64E	ubiquitin carboxyl-terminal hydrolase 64E isoform X1	UBPE_DROMEUbiquitin carboxyl-terminal hydrolase 47 OS=Drosophila melanogaster OX=7227 GN=Usp47 PE=1 SV=2	INVnr_XP_001866927.1_ubiquitin_carboxyl-terminal_hydrolase_64E_[Culex_quinquefasciatus]
	CPIJ802499-PA	Leucine-rich repeat transmembrane neuronal protein 2 precursor	NA	NA	NA
	CPIJ018194-PA	Conserved hypothetical protein	KAT8 regulatory NSL complex subunit 2 isoform X3	KANL2_BOVINKAT8 regulatory NSL complex subunit 2 OS=Bos taurus OX=9913 GN=KANSL2 PE=2 SV=1	INVnr_XP_001868870.1_conserved_hypothetical_protein_[Culex_quinquefasciatus]
	CPIJ012916-PA	Conserved hypothetical protein	KAT8 regulatory NSL complex subunit 2 isoform X1	KANL2_BOVINKAT8 regulatory NSL complex subunit 2 OS=Bos taurus OX=9913 GN=KANSL2 PE=2 SV=1	INVnr_XP_001863203.1_conserved_hypothetical_protein_[Culex_quinquefasciatus]
	CPIJ801923-PA	F-box/leucine rich repeat protein	NA	NA	NA
	CPIJ018620-PA	Conserved hypothetical protein	cysteine and histidine-rich 1 homolog	CYHR1_DROMECysteine and histidine-rich 1 homolog OS=Drosophila melanogaster OX=7227 GN=CG32486 PE=2 SV=2	INVnr_XP_001868815.1_conserved_hypothetical_protein_[Culex_quinquefasciatus]
	CPIJ004193-PA	Conserved hypothetical protein	furry-like isoform X3	FRY_DROME furry OS=Drosophila melanogaster OX=7227 GN=fry PE=1 SV=2	INVnr_XP_001846206.1_conserved_hypothetical_protein_[Culex_quinquefasciatus]
	CPIJ004192-PA	Conserved hypothetical protein	furry isoform X3	FRY_DROME furry OS=Drosophila melanogaster OX=7227 GN=fry PE=1 SV=2	INVnr_XP_001846205.1_conserved_hypothetical_protein_[Culex_quinquefasciatus]
	CPIJ006407-PA	Unkempt protein	RING finger unkempt-like isoform X3	UNK_DROMERING finger unkempt OS=Drosophila melanogaster OX=7227 GN=unk PE=1 SV=1	INVnr_XP_001848280.1_unkempt_protein_[Culex_quinquefasciatus]
	CPIJ004198-PA	Conserved hypothetical protein	furry isoform X1	FRY_DROME furry OS=Drosophila melanogaster OX=7227 GN=fry PE=1 SV=2	INVnr_XP_001846211.1_conserved_hypothetical_protein_[Culex_quinquefasciatus]
	CPIJ006276-PA	F-box/WD repeat protein 5	F-box WD repeat 5	FBXW5_RATF-box WD repeat-containing 5 OS=Rattus norvegicus OX=10116 GN=Fbxw5 PE=2 SV=1	INVnr_XP_001847742.1_F-box/WD_repeat_protein_5_[Culex_quinquefasciatus]
	CPIJ016827-PA	26S proteasome regulatory subunit S3	26S proteasome regulatory subunit S3	CSN3_DROMECOP9 signalosome complex subunit 3 OS=Drosophila melanogaster OX=7227 GN=CSN3 PE=2 SV=2	INVnr_XP_001867287.1_26S_proteasome_regulatory_subunit_S3_[Culex_quinquefasciatus]
	CPIJ010277-PA	Calpain, putative	calpain-B isoform X4	CANA_DROMECalpain-A OS=Drosophila melanogaster OX=7227 GN= PE=1 SV=2	INVnr_XP_001853086.1_calpain_[Culex_quinquefasciatus]
	CPIJ802157-PA	Nuclear hormone receptor FTZ-F1 beta	NA	NA	NA
	CPIJ000469-PA	Protein aq_284	threonylcarbamoyladenosine tRNA methylthiotransferase	CDKAL_DROMEThreonylcarbamoyladenosine tRNA methylthiotransferase OS=Drosophila melanogaster OX=7227 GN=CG6550 PE=2 SV=1	INVnr_XP_001842139.1_aq_284_[Culex_quinquefasciatus]
	CPIJ019833-PA	Monocarboxylate transporter	monocarboxylate transporter	CABL1_HUMANCDK5 and ABL1 enzyme substrate 1 OS=Homo sapiens OX=9606 GN=CABLES1 PE=1 SV=2	INVnr_XP_001870044.1_monocarboxylate_transporter_[Culex_quinquefasciatus]
	CPIJ013392-PA	Conserved hypothetical protein	zinc finger CCCH domain-containing 14	ZC3HE_CHICKZinc finger CCCH domain-containing 14 OS=Gallus gallus OX=9031 GN=ZC3H14 PE=2 SV=1	INVnr_XP_001863574.1_conserved_hypothetical_protein_[Culex_quinquefasciatus]
	CPIJ801958-PA	Conserved hypothetical protein	NA	NA	NA
3. Finger scan zinc	CPIJ000639-PA	Conserved hypothetical protein	zinc finger 366	ZBT40_HUMANZinc finger and BTB domain-containing 40 OS=Homo sapiens OX=9606 GN=ZBTB40 PE=1 SV=4	INVnr_XP_001842402.1_conserved_hypothetical_protein_[Culex_quinquefasciatus]
(32 genes)	CPIJ013499-PA	Zinc finger and SCAN domain-containing protein 21	zinc finger 708	ZN235_HUMANZinc finger 235 OS=Homo sapiens OX=9606 GN=ZNF235 PE=2 SV=3	INVnr_XP_001863734.1_zinc_finger_and_SCAN_domain-containing_protein_21_[Culex_quinquefasciatus]
	CPIJ000636-PA	Zinc finger protein 271	zinc finger 271	ZN729_HUMANZinc finger 729 OS=Homo sapiens OX=9606 GN=ZNF729 PE=2 SV=4	INVnr_XP_001842399.1_zinc_finger_protein_271_[Culex_quinquefasciatus]
	CPIJ001300-PA	Zinc finger protein 780B	zinc finger 780B	ZNF81_HUMANZinc finger 81 OS=Homo sapiens OX=9606 GN=ZNF81 PE=1 SV=3	INVnr_XP_001842969.1_zinc_finger_protein_780B_[Culex_quinquefasciatus]
	CPIJ018423-PA	Zinc finger protein	zinc finger	ZNF81_HUMANZinc finger 81 OS=Homo sapiens OX=9606 GN=ZNF81 PE=1 SV=3	INVnr_XP_001869125.1_zinc_finger_protein_[Culex_quinquefasciatus]
	CPIJ003653-PA	Myoneurin	zinc finger 883-like	ZN347_HUMANZinc finger 347 OS=Homo sapiens OX=9606 GN=ZNF347 PE=1 SV=2	INVnr_XP_001845432.1_myoneurin_[Culex_quinquefasciatus]
	CPIJ008292-PA	Conserved hypothetical protein	zinc finger weckle-like	ZFP26_MOUSEZinc finger 26 OS=Mus musculus OX=10090 GN=Zfp26 PE=2 SV=2	INVnr_XP_001849408.1_conserved_hypothetical_protein_[Culex_quinquefasciatus]
	CPIJ008746-PA	Zinc finger protein 545	zinc finger 545	ZFP3_MOUSEZinc finger 3 OS=Mus musculus OX=10090 GN=Zfp3 PE=2 SV=1	INVnr_XP_001850401.1_zinc_finger_protein_545_[Culex_quinquefasciatus]
	CPIJ008300-PA	Zinc finger protein 501	zinc finger 501	ZSCA2_MOUSEZinc finger and SCAN domain-containing 2 OS=Mus musculus OX=10090 GN=Zscan2 PE=1 SV=1	INVnr_XP_001849416.1_zinc_finger_protein_501_[Culex_quinquefasciatus]
	CPIJ002810-PA	PR domain zinc finger protein 1	PR domain zinc finger 1	ZFP26_MOUSEZinc finger 26 OS=Mus musculus OX=10090 GN=Zfp26 PE=2 SV=2	INVnr_XP_001844966.1_PR_domain_zinc_finger_protein_1_[Culex_quinquefasciatus]
	CPIJ009631-PA	Zinc finger protein 24	zinc finger 24	ZN506_HUMANZinc finger 506 OS=Homo sapiens OX=9606 GN=ZNF506 PE=2 SV=2	INVnr_XP_001850937.1_zinc_finger_protein_24_[Culex_quinquefasciatus]
	CPIJ010646-PA	Conserved hypothetical protein	zinc finger and BTB domain-containing 24	ZN287_HUMANZinc finger 287 OS=Homo sapiens OX=9606 GN=ZNF287 PE=2 SV=1	INVnr_XP_001854413.1_conserved_hypothetical_protein_[Culex_quinquefasciatus]
	CPIJ000180-PA	Conserved hypothetical protein	conserved hypothetical protein	ZEP3_MOUSETranscription factor HIVEP3 OS=Mus musculus OX=10090 GN=Hivep3 PE=1 SV=1	INVnr_XP_001841945.1_conserved_hypothetical_protein_[Culex_quinquefasciatus]
	CPIJ012306-PA	Zinc finger imprinted 3	zinc finger imprinted 3	ZFP26_MOUSEZinc finger 26 OS=Mus musculus OX=10090 GN=Zfp26 PE=2 SV=2	INVnr_XP_001862549.1_zinc_finger_imprinted_3_[Culex_quinquefasciatus]
	CPIJ015206-PA	Zinc finger protein 59	zinc finger 59	ZN616_HUMANZinc finger 616 OS=Homo sapiens OX=9606 GN=ZNF616 PE=2 SV=2	INVnr_XP_001865611.1_zinc_finger_protein_59_[Culex_quinquefasciatus]
	CPIJ011862-PA	Zinc finger protein	zinc finger	ZN551_HUMANZinc finger 551 OS=Homo sapiens OX=9606 GN=ZNF551 PE=1 SV=3	INVnr_XP_001862237.1_zinc_finger_protein_[Culex_quinquefasciatus]
	CPIJ000178-PA	Zinc finger protein 60	zinc finger 60	ZN710_MOUSEZinc finger 710 OS=Mus musculus OX=10090 GN=Znf710 PE=2 SV=1	INVnr_XP_001841943.1_zinc_finger_protein_60_[Culex_quinquefasciatus]
	CPIJ008296-PA	Zinc finger protein 668	zinc finger 668	ZG7_XENLAGastrula zinc finger (Fragment) OS=Xenopus laevis OX=8355 PE=3 SV=1	INVnr_XP_001849412.1_zinc_finger_protein_668_[Culex_quinquefasciatus]
	CPIJ001512-PA	Zinc finger protein	zinc finger	ZN615_HUMANZinc finger 615 OS=Homo sapiens OX=9606 GN=ZNF615 PE=2 SV=2	INVnr_XP_001843813.1_zinc_finger_protein_[Culex_quinquefasciatus]
	CPIJ011864-PA	Zinc finger protein 14	zinc finger 14	ZN484_HUMANZinc finger 484 OS=Homo sapiens OX=9606 GN=ZNF484 PE=1 SV=1	INVnr_XP_001862239.1_zinc_finger_protein_14_[Culex_quinquefasciatus]
	CPIJ000772-PA	Zinc finger protein 189	zinc finger 189	ZNF35_HUMANZinc finger 35 OS=Homo sapiens OX=9606 GN=ZNF35 PE=1 SV=4	INVnr_XP_001842578.1_zinc_finger_protein_189_[Culex_quinquefasciatus]
	CPIJ010972-PA	Zinc finger protein	zinc finger	ZN253_HUMANZinc finger 253 OS=Homo sapiens OX=9606 GN=ZNF253 PE=2 SV=2	INVnr_XP_001861786.1_zinc_finger_protein_[Culex_quinquefasciatus]
	CPIJ014715-PA	Zinc finger protein	zinc finger	ZN782_HUMANZinc finger 782 OS=Homo sapiens OX=9606 GN=ZNF782 PE=2 SV=1	INVnr_XP_001865067.1_zinc_finger_protein_[Culex_quinquefasciatus]
	CPIJ002976-PA	Zinc finger protein 307	zinc finger 307	ZN835_HUMANZinc finger 835 OS=Homo sapiens OX=9606 GN=ZNF835 PE=2 SV=2	INVnr_XP_001844868.1_zinc_finger_protein_307_[Culex_quinquefasciatus]
	CPIJ018768-PA	Conserved hypothetical protein	zinc finger 180-like	MYNN_MOUSEMyoneurin OS=Mus musculus OX=10090 GN=Mynn PE=2 SV=2	INVnr_XP_001869071.1_conserved_hypothetical_protein_[Culex_quinquefasciatus]
	CPIJ012260-PA	Conserved hypothetical protein	zinc finger 544	ZG26_XENLAGastrula zinc finger (Fragment) OS=Xenopus laevis OX=8355 PE=3 SV=1	INVnr_XP_001862608.1_conserved_hypothetical_protein_[Culex_quinquefasciatus]
	CPIJ016412-PA	Conserved hypothetical protein	gastrula zinc finger -like	---NA---	INVnr_XP_001866522.1_conserved_hypothetical_protein_[Culex_quinquefasciatus]
	CPIJ012330-PA	Oocyte zinc finger protein XLCOF10	oocyte zinc finger XLCOF10	GRAU_DROMETranscription factor grauzone OS=Drosophila melanogaster OX=7227 GN=grau PE=1 SV=1	INVnr_XP_001862414.1_oocyte_zinc_finger_protein_XLCOF10_[Culex_quinquefasciatus]
	CPIJ010345-PA	Conserved hypothetical protein	zinc finger 275	ZN574_MOUSEZinc finger 574 OS=Mus musculus OX=10090 GN=Znf574 PE=1 SV=1	INVnr_XP_001870985.1_conserved_hypothetical_protein_[Culex_quinquefasciatus]
	CPIJ017035-PA	Zinc finger protein 141	zinc finger 141	ZSC22_HUMANZinc finger and SCAN domain-containing 22 OS=Homo sapiens OX=9606 GN=ZSCAN22 PE=1 SV=2	INVnr_XP_001867506.1_zinc_finger_protein_141_[Culex_quinquefasciatus]
	CPIJ007837-PA	Zinc finger protein	zinc finger	GLIS2_DROMEZinc finger GLIS2 homolog OS=Drosophila melanogaster OX=7227 GN=sug PE=2 SV=1	INVnr_XP_001849501.1_zinc_finger_protein_[Culex_quinquefasciatus]
	CPIJ012788-PA	Zinc finger protein	transcription factor grauzone-like	GRAU_DROMETranscription factor grauzone OS=Drosophila melanogaster OX=7227 GN=grau PE=1 SV=1	INVnr_XP_001863404.1_zinc_finger_protein_[Culex_quinquefasciatus]
4. Part electron fe-s	CPIJ000640-PA	Tsc1	Tsc1	TSC1_RATHamartin OS=Rattus norvegicus OX=10116 GN=Tsc1 PE=1 SV=1	INVnr_XP_001842403.1_Tsc1_[Culex_quinquefasciatus]
(19 genes)	CPIJ007754-PA	Rac serine/threonine kinase	RAC serine threonine- kinase	AKT1_DROMERAC serine threonine- kinase OS=Drosophila melanogaster OX=7227 GN=Akt1 PE=1 SV=3	INVnr_XP_001849257.1_rac_serine/threonine_kinase_[Culex_quinquefasciatus]
	CPIJ008547-PA	Myd88, putative	myeloid differentiation primary response 88	MYD88_CHICKMyeloid differentiation primary response 88 OS=Gallus gallus OX=9031 GN=MYD88 PE=1 SV=1	INVnr_XP_001850286.1_myd88_[Culex_quinquefasciatus]
	CPIJ006282-PA	Serine/threonine protein kinase, putative	serine threonine kinase	TRIB2_HUMANTribbles homolog 2 OS=Homo sapiens OX=9606 GN=TRIB2 PE=1 SV=1	INVnr_XP_001847748.1_serine/threonine_protein_kinase_[Culex_quinquefasciatus]
	CPIJ012218-PA	Rhogtpase	rho GTPase	RHBT1_HUMANRho-related BTB domain-containing 1 OS=Homo sapiens OX=9606 GN=RHOBTB1 PE=2 SV=2	INVnr_XP_001862359.1_rho_GTPase_[Culex_quinquefasciatus]
	CPIJ015177-PA	Serine/threonine-protein kinase OSR1	serine threonine- kinase OSR1	OXSR1_PONABSerine threonine- kinase OSR1 OS=Pongo abelii OX=9601 GN=OXSR1 PE=2 SV=1	INVnr_XP_001865646.1_serine/threonine-protein_kinase_OSR1_[Culex_quinquefasciatus]
	CPIJ006699-PA	Wiskott-aldrich syndrome protein	neural Wiskott-Aldrich syndrome	WASL_MOUSENeural Wiskott-Aldrich syndrome OS=Mus musculus OX=10090 GN=Wasl PE=1 SV=1	INVnr_XP_001848257.1_wiskott-aldrich_syndrome_protein_[Culex_quinquefasciatus]
	CPIJ001760-PA	Jak kinase hopscotch	jak kinase hopscotch	JAK_DROMETyrosine- kinase hopscotch OS=Drosophila melanogaster OX=7227 GN=hop PE=1 SV=2	INVnr_XP_001843625.1_jak_kinase_hopscotch_[Culex_quinquefasciatus]
	CPIJ001354-PA	Exocyst complex component 4	exocyst complex component 4	EXOC4_DROMEExocyst complex component 4 OS=Drosophila melanogaster OX=7227 GN=Sec8 PE=1 SV=3	INVnr_XP_001843132.1_exocyst_complex_component_4_[Culex_quinquefasciatus]
	CPIJ003276-PA	Deoxynucleoside kinase	deoxynucleoside kinase	DNK_DROMEDeoxynucleoside kinase OS=Drosophila melanogaster OX=7227 GN=dnk PE=1 SV=1	INVnr_XP_001845002.1_deoxynucleoside_kinase_[Culex_quinquefasciatus]
	CPIJ000260-PA	p130CAS	breast cancer anti-estrogen resistance 1 isoform X1	BCAR1_HUMANBreast cancer anti-estrogen resistance 1 OS=Homo sapiens OX=9606 GN=BCAR1 PE=1 SV=2	INVnr_XP_001841833.1_p130CAS_[Culex_quinquefasciatus]
	CPIJ801901-PA	Rho-associated protein kinase 1	NA	NA	NA
	CPIJ007550-PA	FCH and double SH3 domains protein 2	FCH and double SH3 domains 2	FCSD2_HUMANF-BAR and double SH3 domains 2 OS=Homo sapiens OX=9606 GN=FCHSD2 PE=1 SV=3	INVnr_XP_001849666.1_FCH_and_double_SH3_domains_protein_2_[Culex_quinquefasciatus]
	CPIJ009467-PA	Conserved hypothetical protein	WW domain-containing tag-325-like isoform X2	TG325_CAEELWW domain-containing tag-325 OS=Caenorhabditis elegans OX=6239 GN=tag-325 PE=4 SV=1	INVnr_XP_001851415.1_conserved_hypothetical_protein_[Culex_quinquefasciatus]
	CPIJ013989-PA	Synaptic ras gtpase activating protein	probable Ras GTPase-activating	GAP2_DROMEProbable Ras GTPase-activating OS=Drosophila melanogaster OX=7227 GN=CG42684 PE=1 SV=3	INVnr_XP_001864050.1_synaptic_ras_GTPase_activating_protein_[Culex_quinquefasciatus]
	CPIJ011774-PA	Neurofibromin	---NA---	NF1_RATNeurofibromin OS=Rattus norvegicus OX=10116 GN=Nf1 PE=1 SV=1	INVnr_XP_001862517.1_neurofibromin_[Culex_quinquefasciatus]
	CPIJ007323-PA	Formin 3	formin 3	FHDC1_HUMANFH2 domain-containing 1 OS=Homo sapiens OX=9606 GN=FHDC1 PE=1 SV=2	INVnr_XP_001848691.1_formin_3_[Culex_quinquefasciatus]
	CPIJ004254-PA	Conserved hypothetical protein	formin CG32138	Y2138_DROMEFormin CG32138 OS=Drosophila melanogaster OX=7227 GN=CG32138 PE=1 SV=3	INVnr_XP_001845834.1_conserved_hypothetical_protein_[Culex_quinquefasciatus]
	CPIJ003677-PA	Nadph fad oxidoreductase	NADPH FAD oxidoreductase	NDOR1_DANRENADPH-dependent diflavin oxidoreductase 1 OS=Danio rerio OX=7955 GN=ndor1 PE=2 SV=1	INVnr_XP_001845457.1_NADPH_FAD_oxidoreductase_[Culex_quinquefasciatus]
5. P450 4d8 cytochrome	CPIJ800145-PA	Cytochrome P450	NA	NA	NA
(17 genes)	CPIJ001759-PA	Cytochrome P450 4c21	cytochrome P450 4c21	C4D14_DROMEProbable cytochrome P450 4d14 OS=Drosophila melanogaster OX=7227 GN=Cyp4d14 PE=3 SV=1	INVnr_XP_001843624.1_cytochrome_P450_4c21_[Culex_quinquefasciatus]
	CPIJ800259-PA	Cytochrome P450	NA	NA	NA
	CPIJ015681-PA	Cytochrome P450 4d1	cytochrome P450 4d1	CP4D1_DROMECytochrome P450 4d1 OS=Drosophila melanogaster OX=7227 GN=Cyp4d1 PE=2 SV=2	INVnr_XP_001866325.1_cytochrome_P450_4d1_[Culex_quinquefasciatus]
	CPIJ020229-PA	Cytochrome P450 4d8	cytochrome P450 4d8	CP4D2_DROMECytochrome P450 4d2 OS=Drosophila melanogaster OX=7227 GN=Cyp4d2 PE=2 SV=2	INVnr_XP_001870443.1_cytochrome_P450_4d8_[Culex_quinquefasciatus]
	CPIJ800261-PA	Cytochrome P450	NA	NA	NA
	CPIJ006606-PA	Molybdopterin cofactor synthesis protein a	molybdopterin cofactor synthesis a	MOCS1_DROMEMolybdenum cofactor biosynthesis 1 OS=Drosophila melanogaster OX=7227 GN=Mocs1 PE=2 SV=1	INVnr_XP_001848384.1_molybdopterin_cofactor_synthesis_protein_a_[Culex_quinquefasciatus]
	CPIJ001243-PA	Conserved hypothetical protein	alkylated DNA repair alkB homolog 8-like	ALKB8_XENTRAlkylated DNA repair alkB homolog 8 OS=Xenopus tropicalis OX=8364 GN=alkbh8 PE=2 SV=2	INVnr_XP_001842912.1_conserved_hypothetical_protein_[Culex_quinquefasciatus]
	CPIJ002361-PA	Sodium/solute symporter, putative	sodium solute symporter	SC5A8_MOUSESodium-coupled monocarboxylate transporter 1 OS=Mus musculus OX=10090 GN=Slc5a8 PE=1 SV=1	INVnr_XP_001844105.1_sodium/solute_symporter_[Culex_quinquefasciatus]
	CPIJ000863-PA	6-pyruvoyl tetrahydrobiopterin synthase	6-pyruvoyl tetrahydrobiopterin synthase	PTPS_DROME6-pyruvoyl tetrahydrobiopterin synthase OS=Drosophila melanogaster OX=7227 GN=pr PE=1 SV=1	INVnr_XP_001842486.1_6-pyruvoyl_tetrahydrobiopterin_synthase_[Culex_quinquefasciatus]
	CPIJ800153-PA	Cytochrome P450	NA	NA	NA
	CPIJ800203-PA	Cytochrome P450	NA	NA	NA
	CPIJ800232-PA	Cytochrome P450	NA	NA	NA
	CPIJ800206-PA	Cytochrome P450	NA	NA	NA
	CPIJ800223-PA	Cytochrome P450	NA	NA	NA
	CPIJ800197-PA	Cytochrome P450	NA	NA	NA
	CPIJ800204-PA	Cytochrome P450	NA	NA	NA
6. Signal cointegrator pre-mrna-splicing	CPIJ016885-PA	pre-mRNA-splicing factor prp1	pre-mRNA-splicing factor prp1	PRP6_HUMANPre-mRNA-processing factor 6 OS=Homo sapiens OX=9606 GN=PRPF6 PE=1 SV=1	INVnr_XP_001866982.1_pre-mRNA-splicing_factor_prp1_[Culex_quinquefasciatus]
	CPIJ006748-PA	Activating signal cointegrator 1 complex subunit 3	activating signal cointegrator 1 complex subunit 3	ASCC3_CHICKActivating signal cointegrator 1 complex subunit 3 OS=Gallus gallus OX=9031 GN=ascc3 PE=3 SV=2	INVnr_XP_001849123.1_activating_signal_cointegrator_1_complex_subunit_3_[Culex_quinquefasciatus]
(15 genes)	CPIJ014149-PA	Splicing factor 3B subunit 4	splicing factor 3B subunit 4	SF3B4_HUMANSplicing factor 3B subunit 4 OS=Homo sapiens OX=9606 GN=SF3B4 PE=1 SV=1	INVnr_XP_019559272.1_PREDICTED:_splicing_factor_3B_subunit_4-like_[Aedes_albopictus]
	CPIJ000538-PA	Tuftelin-interacting protein 11	tuftelin-interacting 11	TFP11_DROMESeptin-interacting 1 OS=Drosophila melanogaster OX=7227 GN=sip1 PE=1 SV=1	INVnr_XP_001842208.1_tuftelin-interacting_protein_11_[Culex_quinquefasciatus]
	CPIJ006954-PA	Peptidyl-prolyl cis-trans isomerase	peptidyl-prolyl cis-trans isomerase	PPIA1_RHIO9Peptidyl-prolyl cis-trans isomerase A1 OS=Rhizopus delemar (strain RA 99-880 ATCC MYA-4621 FGSC 9543 NRRL 43880) OX=246409 GN=cyp2 PE=3 SV=1	INVnr_XP_001849001.1_peptidyl-prolyl_cis-trans_isomerase_[Culex_quinquefasciatus]
	CPIJ001478-PA	pre-mRNA-splicing factor cwc22	pre-mRNA-splicing factor cwc22	CWC22_MUSDOPre-mRNA-splicing factor CWC22 homolog OS=Musca domestica OX=7370 GN=ncm PE=3 SV=1	INVnr_XP_001843779.1_pre-mRNA-splicing_factor_cwc22_[Culex_quinquefasciatus]
	CPIJ801423-PA	Multi-sex-combs	NA	NA	NA
	CPIJ000280-PA	Conserved hypothetical protein	serine arginine repetitive matrix 2 isoform X3	SRRM2_HUMANSerine arginine repetitive matrix 2 OS=Homo sapiens OX=9606 GN=SRRM2 PE=1 SV=2	INVnr_XP_001841853.1_conserved_hypothetical_protein_[Culex_quinquefasciatus]
	CPIJ010870-PA	pre-mRNA-splicing factor SLU7	pre-mRNA-splicing factor SLU7	SLU7_DROMEPre-mRNA-splicing factor Slu7 OS=Drosophila melanogaster OX=7227 GN=Slu7 PE=1 SV=2	INVnr_XP_001870964.1_pre-mRNA-splicing_factor_SLU7_[Culex_quinquefasciatus]
	CPIJ004458-PA	ATP-dependent RNA helicase DHX8	ATP-dependent RNA helicase DHX33	DHX33_MOUSEATP-dependent RNA helicase DHX33 OS=Mus musculus OX=10090 GN=Dhx33 PE=1 SV=1	INVnr_XP_001846044.1_ATP-dependent_RNA_helicase_DHX8_[Culex_quinquefasciatus]
	CPIJ003439-PA	Intron-binding protein aquarius	intron-binding aquarius	AQR_HUMANRNA helicase aquarius OS=Homo sapiens OX=9606 GN=AQR PE=1 SV=4	INVnr_XP_001845209.1_intron-binding_protein_aquarius_[Culex_quinquefasciatus]
	CPIJ003636-PA	GTP binding protein	GTP binding	GTPB2_MOUSEGTP-binding 2 OS=Mus musculus OX=10090 GN=Gtpbp2 PE=1 SV=1	INVnr_XP_001845415.1_GTP_binding_protein_[Culex_quinquefasciatus]
	CPIJ801523-PA	Leucine-rich repeat-containing protein 40	NA	NA	NA
	CPIJ006841-PA	SAPS287	leucine-rich repeats and immunoglobulin-like domains 2	LRIG3_HUMANLeucine-rich repeats and immunoglobulin-like domains 3 OS=Homo sapiens OX=9606 GN=LRIG3 PE=2 SV=1	INVnr_XP_001848389.1_SAPS287_[Culex_quinquefasciatus]
	CPIJ003638-PA	Conserved hypothetical protein	RNA-binding 40	U1165_ARATHU11 U12 small nuclear ribonucleo 65 kDa OS=Arabidopsis thaliana OX=3702 GN=SNRNP65 PE=1 SV=1	INVnr_XP_001845417.1_conserved_hypothetical_protein_[Culex_quinquefasciatus]
7. Luciferin 4-monooxygenase ligase	CPIJ017305-PA	Sterol desaturase	sterol desaturase	FXDC2_MACFAFatty acid hydroxylase domain-containing 2 OS=Macaca fascicularis OX=9541 GN=FAXDC2 PE=2 SV=1	INVnr_XP_001867830.1_sterol_desaturase_[Culex_quinquefasciatus]
	CPIJ019765-PA	Cytochrome P450 9c1	cytochrome P450	CP9E2_BLAGECytochrome P450 9e2 OS=Blattella germanica OX=6973 GN=CYP9E2 PE=2 SV=1	INVnr_XP_001869970.1_cytochrome_P450_9c1_[Culex_quinquefasciatus]
(9 genes)	CPIJ000427-PA	AMP dependent coa ligase, putative	AMP dependent coa ligase	ACSF2_DANREAcyl- synthetase family member mitochondrial OS=Danio rerio OX=7955 GN=acsf2 PE=2 SV=1	INVnr_XP_001842097.1_AMP_dependent_coa_ligase_[Culex_quinquefasciatus]
	CPIJ003656-PA	Luciferin 4-monooxygenase	luciferin 4-monooxygenase	LUCI_AQULALuciferin 4-monooxygenase OS=Aquatica lateralis OX=7052 PE=2 SV=1	INVnr_XP_001845435.1_luciferin_4-monooxygenase_[Culex_quinquefasciatus]
	CPIJ015088-PA	4-coumarate-CoA ligase 1	4-coumarate-- ligase 1	LUCI_LUCMILuciferin 4-monooxygenase OS=Luciola mingrelica OX=27446 PE=1 SV=1	INVnr_XP_001865675.1_4-coumarate-CoA_ligase_1_[Culex_quinquefasciatus]
	CPIJ002867-PA	AMP dependent coa ligase, putative	4-coumarate-- ligase-like 7	4CL3_ORYSJProbable 4-coumarate-- ligase 3 OS=Oryza sativa japonica OX=39947 GN=4CL3 PE=2 SV=1	INVnr_XP_001844398.1_AMP_dependent_coa_ligase_[Culex_quinquefasciatus]
	CPIJ018155-PA	Luciferin 4-monooxygenase	probable 4-coumarate-- ligase 1	4CL3_DICDIProbable 4-coumarate-- ligase 3 OS=Dictyostelium discoideum OX=44689 GN=4cl3 PE=3 SV=2	INVnr_XP_001868564.1_luciferin_4-monooxygenase_[Culex_quinquefasciatus]
	CPIJ000426-PA	Acetyl-coenzyme A synthetase	acetyl-coenzyme A synthetase	ACSF2_MACFAAcyl- synthetase family member mitochondrial OS=Macaca fascicularis OX=9541 GN=ACSF2 PE=2 SV=1	INVnr_XP_001842096.1_acetyl-coenzyme_A_synthetase_[Culex_quinquefasciatus]
	CPIJ009095-PA	Luciferin 4-monooxygenase	luciferin 4-monooxygenase	LUCI_PHOPELuciferin 4-monooxygenase OS=Photuris pensylvanica OX=1710587 PE=2 SV=2	INVnr_XP_001850634.1_luciferin_4-monooxygenase_[Culex_quinquefasciatus]
8. Trithorax huntingtin tpr	CPIJ016677-PA	TPR repeat-containing protein	RNA polymerase-associated CTR9 homolog	CTR9_XENLARNA polymerase-associated CTR9 homolog OS=Xenopus laevis OX=8355 GN=ctr9 PE=2 SV=1	INVnr_XP_001866910.1_TPR_repeat-containing_protein_[Culex_quinquefasciatus]
	CPIJ001346-PA	Conserved hypothetical protein	another transcription unit	ATU_DROMEAnother transcription unit OS=Drosophila melanogaster OX=7227 GN=Atu PE=1 SV=2	INVnr_XP_001843124.1_conserved_hypothetical_protein_[Culex_quinquefasciatus]
(8 genes)	CPIJ015837-PA	Conserved hypothetical protein	RNA polymerase-associated Rtf1	RTF1_DROMERNA polymerase-associated Rtf1 OS=Drosophila melanogaster OX=7227 GN=Rtf1 PE=1 SV=1	INVnr_XP_001866828.1_conserved_hypothetical_protein_[Culex_quinquefasciatus]
	CPIJ014416-PA	Conserved hypothetical protein	FACT complex subunit spt16-like isoform X1	SPT16_DROMEFACT complex subunit spt16 OS=Drosophila melanogaster OX=7227 GN=dre4 PE=1 SV=2	INVnr_XP_001864604.1_conserved_hypothetical_protein_[Culex_quinquefasciatus]
	CPIJ005876-PA	Huntingtin interacting protein, putative	probable histone-lysine N-methyltransferase CG1716	C1716_DROMEProbable histone-lysine N-methyltransferase CG1716 OS=Drosophila melanogaster OX=7227 GN=Set2 PE=1 SV=2	INVnr_XP_001847701.1_huntingtin_interacting_protein_[Culex_quinquefasciatus]
	CPIJ801889-PA	Conserved hypothetical protein	NA	NA	NA
	CPIJ005772-PA	Trithorax protein ash2	trithorax ash2	ASH2_DROMESet1 Ash2 histone methyltransferase complex subunit ASH2 OS=Drosophila melanogaster OX=7227 GN=ash2 PE=1 SV=2	INVnr_XP_001847256.1_trithorax_protein_ash2_[Culex_quinquefasciatus]
	CPIJ013584-PA	G patch domain containing 1	G patch domain containing 1	GPTC1_DROMEG patch domain-containing 1 homolog OS=Drosophila melanogaster OX=7227 GN=CG8833 PE=2 SV=1	INVnr_XP_001863956.1_G_patch_domain_containing_1_[Culex_quinquefasciatus]
9. Trypsin and chymotrypsin Bi	CPIJ012013-PA	Serine protease inhibitor, serpin	serine protease inhibitor 28Dc	SP28D_DROMESerine protease inhibitor 28Dc OS=Drosophila melanogaster OX=7227 GN=Spn28Dc PE=2 SV=2	INVnr_XP_001861985.1_serine_protease_inhibitor,_serpin_[Culex_quinquefasciatus]
	CPIJ011298-PA	Brachyurin	venom serine protease-like	SP34_APIMEVenom serine protease 34 OS=Apis mellifera OX=7460 PE=2 SV=1	INVnr_XP_001861527.1_brachyurin_[Culex_quinquefasciatus]
(9 genes)	CPIJ002138-PA	Chymotrypsinogen, putative	4 chymotrypsinogen	CTRC_HUMANChymotrypsin-C OS=Homo sapiens OX=9606 GN=CTRC PE=1 SV=2	INVnr_XP_001843406.1_chymotrypsinogen_[Culex_quinquefasciatus]
	CPIJ013616-PA	Trypsin 5 precursor	trypsin 5	TRY7_ANOGATrypsin-7 OS=Anopheles gambiae OX=7165 GN=TRYP7 PE=2 SV=2	INVnr_XP_001864433.1_trypsin_5_[Culex_quinquefasciatus]
	CPIJ002156-PA	Chymotrypsin BI precursor	chymotrypsin BI	CTR_PHACEChymotrypsin OS=Phaedon cochleariae OX=80249 PE=2 SV=1	INVnr_XP_001843424.1_chymotrypsin_BI_[Culex_quinquefasciatus]
	CPIJ002098-PA	Chymotrypsin BI precursor	chymotrypsin BI	CTRB1_LITVAChymotrypsin BI OS=Litopenaeus vannamei OX=6689 PE=1 SV=1	INVnr_XP_001843365.1_chymotrypsin_BI_[Culex_quinquefasciatus]
	CPIJ006542-PA	Chymotrypsin-2	urokinase-type plasminogen activator	CTR2_VESCRChymotrypsin-2 OS=Vespa crabro OX=7445 PE=1 SV=1	INVnr_XP_001848039.1_chymotrypsin-2_[Culex_quinquefasciatus]
	CPIJ011378-PA	Cationic trypsin precursor	cationic trypsin	CTR2_VESCRChymotrypsin-2 OS=Vespa crabro OX=7445 PE=1 SV=1	INVnr_XP_001861616.1_cationic_trypsin_[Culex_quinquefasciatus]
10. Autophagy-specific gene 2	CPIJ015121-PA	Autophagy-specific gene 2	autophagy-related 2 homolog A	ATG2A_MOUSEAutophagy-related 2 homolog A OS=Mus musculus OX=10090 GN=Atg2a PE=1 SV=2	INVnr_XP_001865123.1_autophagy-specific_gene_2_[Culex_quinquefasciatus]
	CPIJ007401-PA	Autophagy-specific protein, putative	WD repeat domain phosphoinositide-interacting 2 isoform X1	WIPI2_CHICKWD repeat domain phosphoinositide-interacting 2 OS=Gallus gallus OX=9031 GN=WIPI2 PE=2 SV=1	INVnr_XP_001849026.1_Autophagy-specific_protein_[Culex_quinquefasciatus]
(7 genes)	CPIJ012964-PA	Autophagy protein 9	autophagy 9	ATG9A_BOVINAutophagy-related 9A OS=Bos taurus OX=9913 GN=ATG9A PE=2 SV=1	INVnr_XP_001863826.1_autophagy_protein_9_[Culex_quinquefasciatus]
	CPIJ016476-PA	Calcium-dependent protein kinase	calcium-dependent kinase	ULK3_XENLASerine threonine- kinase ULK3 OS=Xenopus laevis OX=8355 GN=ulk3 PE=2 SV=1	INVnr_XP_001866612.1_calcium-dependent_protein_kinase_[Culex_quinquefasciatus]
	CPIJ001273-PA	Conserved hypothetical protein	serine threonine- kinase ULK2-like	ULK2_MOUSESerine threonine- kinase ULK2 OS=Mus musculus OX=10090 GN=Ulk2 PE=1 SV=1	INVnr_XP_001842942.1_conserved_hypothetical_protein_[Culex_quinquefasciatus]
	CPIJ801895-PA	VAC14	NA	NA	NA
	CPIJ003693-PA	Glucosyl/glucuronosyl transferases	glucosyl glucuronosyl transferase	CGT_HUMAN2-hydroxyacylsphingosine 1-beta-galactosyltransferase OS=Homo sapiens OX=9606 GN=UGT8 PE=2 SV=2	INVnr_XP_001845520.1_glucosyl/glucuronosyl_transferase_[Culex_quinquefasciatus]
